# Supplementary material for: The Genetics of a Behavioral Speciation Phenotype in an Island System
Source: Genes (Basel). 2018 Jul 10;9(7):346. doi: 10.3390/genes9070346 (PMC6070818; doi:10.3390/genes9070346)
Supplement: Supplementary file 1 [file genes-09-00346-s001.zip › SupplementaryTables_20180525.xlsx]

## Sheet: S1
Table S1. QTL dominance effects of the HC1 and HC2 cross seperately. QTL are listed as 'linkage group @ position', est = effects size estimate, SE =standard error of estimate, t = statistic for T-test
Dominance Effects
HC1
QTL	est	SE	t	P-value
1@119.0d	0.03708	0.02736	1.355	0.112238
3@72.0d	0.05962	0.02781	2.144	0.0568742
				0.31831
HC2
QTL	est	SE	t	P-value
1@56.9d	0.04219	0.02395	1.761	0.0776153
3@65.0d	0.04489	0.02359	1.903	0.0688772
5@38.4d	-0.04053	0.02354	-1.721	0.0803439
Combined
QTL	est	SE	t	P-value
1@59.0	0.014167	0.01802	0.786	0.196755
2@71.0	0.019957	0.01819	1.097	0.144462
3@79.9	0.03871	0.017274	2.241	0.0528571
4@59.8	0.008198	0.017924	0.457	0.263316
5@36.9	0.017227	0.017243	0.999	0.159314
7@5.0	0.009686	0.020334	0.476	0.259511

## Sheet: S2
Table S2. QTL peak markers ('peak') and flanking markers ('left' and 'right') for the seven LGs with QTL in the two hybrid crosses and the combined data. Shared markers are shown in bold.
		LG1			LG2			LG3			LG4			LG5			LG7			LGX
	HC1	HC2	Combined	HC1	HC2	Combined	HC1	HC2	Combined	HC1	HC2	Combined	HC1	HC2	Combined	HC1	HC2	Combined	HC1	HC2	Combined
left	S000277	S000061	S000270	-	-	S001921	S000355	S002883	S000835	-	-	S002058	-	S000562	S004947*	-		S000257	-	S000913	S000188*
peak	S004794	S002490	S001131	-	-	S001602	S001552	S000355	S000385	-	-	S016452	-	S001294	S002445	-		S003103	-	S001780	S003132
right	S001891	S001891	S001891*	-	-	S000793	S000927	S002699	S003125	-	-	S000591	-	S004947	S001239	-		S007011	-	S000188	S001725
* means secondary flanking marker (the marker directly flanking the flanking marker); these markers are shown when there are no shared markers among the peak and flanking markers

## Sheet: S3
Table S3. all annotated transcripts underneath QTL peaks (peak loci, loci immediately flanking peak loci, and those within LOD1 or LOD2 interval) after collapsing duplicates, isoforms, and partial/full hits.
transcript(s)	scaffold	LG	proximity	gene	length	description	accession	e.value	similarity	bit.score	align_length	matches	GO	GO_name	IPS_GO
TRINITY_GG_621_c1_g1_i1;TRINITY_GG_621_c3_g1_i1	Lko057S000835	1	flanking	cadherin 99C [Drosophila melanogaster]	450	gi|59936685|gb|AAX12106.1|cadherin 99C [Drosophila melanogaster] gi|59936706|gb|AAX12107.1| cadherin 99C [Drosophila melanogaster]	AAX12106, AAX12107	3.99e-32	56.5476	120.939	168	95	P:GO:0045926;P:GO:0007010;F:GO:0050839;P:GO:0007476;P:GO:0022603;P:GO:0002385;P:GO:0048100;P:GO:0048584;P:GO:0032529;C:GO:0005768;P:GO:0051960;C:GO:0005902;P:GO:0045176;F:GO:0017022;P:GO:0019722;P:GO:0016337;P:GO:0000904;P:GO:0031175;P:GO:2000370;P:GO:0007224;P:GO:0042067;P:GO:0046620;P:GO:0048523;P:GO:0007305;P:GO:0009966;P:GO:0007424;C:GO:0031526;P:GO:0098742;C:GO:0016021;C:GO:0016324;P:GO:0032…	P:negativeregulationofgrowth;P:cytoskeletonorganization;F:celladhesionmoleculebinding;P:imaginaldisc-derivedwingmorphogenesis;P:regulationofanatomicalstructuremorphogenesis;P:mucosalimmuneresponse;P:wingdiscanterior/posteriorpatternformation;P:positiveregulationofresponsetostimulus;P:folliclecellmicrovillusorganization;C:endosome;P:regulationofnervoussystemdevelopment;C:microvillus;P:apicalprotei…	F:GO:0005509;C:GO:0016020;P:GO:0007156
TRINITY_GG_621_c6_g1_i1	Lko057S000835	1	flanking	dachsous Ex isoform [Drosophila melanogaster]	227	gi|944547624|gb|ALL98470.1|dachsous Ex isoform [Drosophila melanogaster]	ALL98470	7.57e-08	64.2857	48.1358	56	36	P:GO:0008283; P:GO:0007293; P:GO:0035222; P:GO:0007157; P:GO:0045467; P:GO:0090175; P:GO:0090176; P:GO:0007156; P:GO:0007431; P:GO:0007412; P:GO:0007413; C:GO:0005887; C:GO:0030425; P:GO:0050774; C:GO:0009925; C:GO:0005925; P:GO:0048841; F:GO:0005509; F:GO:0045296; P:GO:0045198; P:GO:0035159; C:GO:0030424; P:GO:0007480; P:GO:0016339; F:GO:0042803; P:GO:0016318; P:GO:0031290; P:GO:0050829; P:GO:00…	P:cell proliferation; P:germarium-derived egg chamber formation; P:wing disc pattern formation; P:heterophilic cell-cell adhesion via plasma membrane cell adhesion molecules; P:R7 cell development; P:regulation of establishment of planar polarity; P:microtubule cytoskeleton organization involved in establishment of planar polarity; P:homophilic cell adhesion via plasma membrane adhesion molecules…	F:GO:0005509; C:GO:0016020; P:GO:0007156
TRINITY_GG_621_c4_g1_i1	Lko057S000835	1	flanking	kugelei	213	gi|442633556|ref|NP_649171.3|kugelei, isoform C [Drosophila melanogaster] gi|665410620|ref|NP_001287126.1| kugelei, isoform E [Drosophila melanogaster] gi|440216048|gb|AAF49078.3| kugelei, isoform C [Drosophila melanogaster] gi|599131347|gb|AHN58151.1| kugelei, isoform E [Drosophila melanogaster]	NP_649171, NP_001287126, AAF49078, AHN58151	0.000138	60.7843	38.891	51	31	P:GO:0045926; P:GO:0007293; F:GO:0050839; P:GO:0090176; P:GO:0032529; C:GO:0005902; F:GO:0005509; P:GO:0045571; F:GO:0045296; P:GO:0045176; P:GO:0035239; F:GO:0017022; P:GO:0019722; P:GO:0035159; P:GO:0016318; P:GO:0000904; P:GO:0032880; P:GO:2000370; P:GO:0042067; P:GO:0007224; P:GO:0046620; F:GO:0004872; P:GO:0007304; P:GO:0040008; P:GO:0007305; P:GO:0007424; P:GO:0044331; P:GO:0030178; P:GO:00…	P:negative regulation of growth; P:germarium-derived egg chamber formation; F:cell adhesion molecule binding; P:microtubule cytoskeleton organization involved in establishment of planar polarity; P:follicle cell microvillus organization; C:microvillus; F:calcium ion binding; P:negative regulation of imaginal disc growth; F:cadherin binding; P:apical protein localization; P:tube morphogenesis; F:m…	F:GO:0005509; C:GO:0016020; P:GO:0007155; C:GO:0005886
TRINITY_GG_621_c0_g1_i1	Lko057S000835	1	flanking	LD23052p [Drosophila melanogaster]	1878	gi|15291671|gb|AAK93104.1|LD23052p [Drosophila melanogaster]	AAK93104	5.3e-43	58.6806	165.236	288	169	P:GO:2000370; P:GO:0007224; P:GO:0002385; P:GO:0007305; P:GO:0048100; P:GO:0032529; C:GO:0005768; C:GO:0031526; C:GO:0005902; P:GO:0045176; F:GO:0017022; P:GO:0035239; P:GO:0019722; P:GO:0098609; C:GO:0016324; P:GO:0032533	P:positive regulation of clathrin-dependent endocytosis; P:smoothened signaling pathway; P:mucosal immune response; P:vitelline membrane formation involved in chorion-containing eggshell formation; P:wing disc anterior/posterior pattern formation; P:follicle cell microvillus organization; C:endosome; C:brush border membrane; C:microvillus; P:apical protein localization; F:myosin binding; P:tube m…	no GO terms
TRINITY_GG_624_c0_g1_i1;TRINITY_GG_624_c0_g1_i2;TRINITY_GG_624_c1_g1_i1	Lko057S000835	1	flanking	lethal (2) 01289	4440	gi|24586058|ref|NP_724492.1|lethal (2) 01289, isoform B [Drosophila melanogaster] gi|6984065|gb|AAF34746.1| l(2)01289 long form [Drosophila melanogaster] gi|23240199|gb|AAN16126.1| lethal (2) 01289, isoform B [Drosophila melanogaster]	NP_724492, AAF34746, AAN16126	0	87.1612	957.592	701	611	P:GO:0045454	P:cellredoxhomeostasis	P:GO:0045454
TRINITY_GG_621_c2_g1_i1;TRINITY_GG_621_c5_g1_i1	Lko057S000835	1	flanking	LP14319p	574	gi|54650730|gb|AAV36944.1|LP14319p, partial [Drosophila melanogaster]	AAV36944	1.04e-73	80.1047	241.891	191	153	P:GO:0007010;F:GO:0050839;P:GO:0007476;P:GO:0007411;P:GO:0002385;P:GO:0048100;P:GO:0048584;C:GO:0005887;P:GO:0032529;C:GO:0005768;P:GO:0009968;P:GO:0050772;C:GO:0005902;F:GO:0005509;P:GO:0045176;F:GO:0017022;P:GO:0019722;P:GO:0016358;P:GO:0016339;P:GO:2000370;P:GO:0008038;P:GO:0007224;P:GO:0042067;P:GO:1902667;P:GO:0048589;F:GO:0004871;P:GO:0007305;P:GO:0007424;P:GO:0048056;P:GO:0030516;C:GO:0031…	P:cytoskeletonorganization;F:celladhesionmoleculebinding;P:imaginaldisc-derivedwingmorphogenesis;P:axonguidance;P:mucosalimmuneresponse;P:wingdiscanterior/posteriorpatternformation;P:positiveregulationofresponsetostimulus;C:integralcomponentofplasmamembrane;P:folliclecellmicrovillusorganization;C:endosome;P:negativeregulationofsignaltransduction;P:positiveregulationofaxonogenesis;C:microvillus;F:…	F:GO:0005509;C:GO:0016020;P:GO:0007155;P:GO:0007156;C:GO:0005886
TRINITY_GG_619_c0_g1_i1	Lko057S000835	1	flanking	mitochondrial ribosomal protein L1 [Drosophila melanogaster]	1478	gi|17737843|ref|NP_524275.1|mitochondrial ribosomal protein L1 [Drosophila melanogaster] gi|15291911|gb|AAK93224.1| LD31571p [Drosophila melanogaster] gi|23175907|gb|AAF54214.2| mitochondrial ribosomal protein L1 [Drosophila melanogaster]	NP_524275, AAK93224, AAF54214	8.91e-80	70.2929	253.447	239	168	F:GO:0003735; P:GO:0019233; P:GO:0032543; C:GO:0005762	F:structural constituent of ribosome; P:sensory perception of pain; P:mitochondrial translation; C:mitochondrial large ribosomal subunit	no GO terms
TRINITY_GG_620_c0_g1_i1	Lko057S000835	1	flanking	stress-sensitive B	1394	gi|24641090|ref|NP_727448.1|stress-sensitive B, isoform C [Drosophila melanogaster] gi|24641092|ref|NP_727449.1| stress-sensitive B, isoform D [Drosophila melanogaster] gi|92090586|sp|Q26365.4|ADT_DROME RecName: Full=ADP,ATP carrier protein; AltName: Full=ADP/ATP translocase; AltName: Full=Adenine nucleotide translocator; Short=ANT; AltName: Full=Stress-sensitive protein B gi|22832050|gb|AAN09267…	NP_727448, NP_727449, Q26365, AAN09267, AAN09268, ACZ98473	1.09e-135	82.392	394.045	301	248	P:GO:0046716; P:GO:0055085; P:GO:0040011; F:GO:0005471; P:GO:0008340; P:GO:2001171; P:GO:0051480; P:GO:0007268; C:GO:0005743; P:GO:0009612; C:GO:0005811; P:GO:0070050; P:GO:0051124; P:GO:0006839; P:GO:0048489; P:GO:0048477; P:GO:0007629; P:GO:0010507; P:GO:0051560; P:GO:0034599; P:GO:0001508; P:GO:0015867; P:GO:0015866; P:GO:0051900	P:muscle cell cellular homeostasis; P:transmembrane transport; P:locomotion; F:ATP:ADP antiporter activity; P:determination of adult lifespan; P:positive regulation of ATP biosynthetic process; P:regulation of cytosolic calcium ion concentration; P:chemical synaptic transmission; C:mitochondrial inner membrane; P:response to mechanical stimulus; C:lipid particle; P:neuron cellular homeostasis; P:…	P:GO:0055085; P:GO:0006810; F:GO:0005215; C:GO:0005743
TRINITY_GG_619_c3_g1_i1	Lko057S000835	1	flanking	twin	4208	gi|24649579|ref|NP_732964.1|twin, isoform C [Drosophila melanogaster] gi|23172140|gb|AAN13986.1| twin, isoform C [Drosophila melanogaster] gi|33589482|gb|AAQ22508.1| LD39302p [Drosophila melanogaster]	NP_732964, AAN13986, AAQ22508	0	83.8768	759.599	552	463	F:GO:0004535; P:GO:0048132; F:GO:0005515; C:GO:0005829; C:GO:0030014; P:GO:0017148; P:GO:0000289	F:poly(A)-specific ribonuclease activity; P:female germ-line stem cell asymmetric division; F:protein binding; C:cytosol; C:CCR4-NOT complex; P:negative regulation of translation; P:nuclear-transcribed mRNA poly(A) tail shortening	F:GO:0005515
TRINITY_GG_11488_c0_g1_i1	Lko057S003125	1	flanking	widerborst	2443	gi|21357653|ref|NP_651569.1|widerborst, isoform C [Drosophila melanogaster] gi|24650645|ref|NP_733215.1| widerborst, isoform A [Drosophila melanogaster] gi|24650647|ref|NP_733216.1| widerborst, isoform B [Drosophila melanogaster] gi|24650650|ref|NP_733217.1| widerborst, isoform D [Drosophila melanogaster] gi|24650652|ref|NP_733218.1| widerborst, isoform E [Drosophila melanogaster] gi|24650654|ref…	NP_651569, NP_733215, NP_733216, NP_733217, NP_733218, NP_733219, AAD38671, AAF56720, AAN14113, AAN14114, AAN14115, AAN14116, AAN14117	0	91.7738	593.193	389	357	P:GO:0007274; P:GO:0007165; P:GO:0008340; P:GO:0006470; P:GO:0007059; P:GO:0045498; C:GO:0000159; P:GO:0007528; P:GO:0051225; P:GO:0006914; P:GO:0043066; P:GO:0097479; P:GO:0019233; P:GO:0051726; P:GO:0070328; F:GO:0019888	P:neuromuscular synaptic transmission; P:signal transduction; P:determination of adult lifespan; P:protein dephosphorylation; P:chromosome segregation; P:sex comb development; C:protein phosphatase type 2A complex; P:neuromuscular junction development; P:spindle assembly; P:autophagy; P:negative regulation of apoptotic process; P:synaptic vesicle localization; P:sensory perception of pain; P:regu…	P:GO:0007165; C:GO:0000159; F:GO:0005488; F:GO:0019888
TRINITY_GG_11486_c2_g1_i1	Lko057S003125	1	flanking	zinc finger protein [Oryctes borbonicus]	302	gi|952541078|gb|KRT86022.1|zinc finger protein [Oryctes borbonicus]	KRT86022	9.85e-21	90.3846	92.8189	52	47	F:GO:0003676; F:GO:0046872	F:nucleic acid binding; F:metal ion binding	no GO terms
TRINITY_GG_2721_c1_g1_i1;TRINITY_GG_2721_c1_g1_i2	Lko057S001265	1	LOD1	CG7791 [Drosophila melanogaster]	2262	gi|20129717|ref|NP_610183.1|CG7791 [Drosophila melanogaster] gi|7302217|gb|AAF57312.1| CG7791 [Drosophila melanogaster]	NP_610183, AAF57312	0	77.0408	737.258	588	453	C:GO:0005739;P:GO:0016485;F:GO:0004222	C:mitochondrion;P:proteinprocessing;F:metalloendopeptidaseactivity	P:GO:0006627;C:GO:0005759;P:GO:0006508;F:GO:0004222
TRINITY_GG_2721_c0_g1_i1	Lko057S001265	1	LOD1	CG9246 [Drosophila melanogaster]	2528	gi|19921616|ref|NP_610095.1|CG9246 [Drosophila melanogaster] gi|8928529|sp|Q9VIF0.1|NOC2L_DROME RecName: Full=Nucleolar complex protein 2 homolog; Short=Protein NOC2 homolog gi|7298760|gb|AAF53971.1| CG9246 [Drosophila melanogaster] gi|16769668|gb|AAL29053.1| LD46269p [Drosophila melanogaster]	NP_610095, Q9VIF0, AAF53971, AAL29053	0	64.7516	545.814	644	417	P:GO:0022008	P:neurogenesis	F:GO:0005488
TRINITY_GG_2718_c0_g1_i1	Lko057S001265	1	LOD1	cullin 4	3332	gi|24586500|ref|NP_610352.2|cullin 4, isoform A [Drosophila melanogaster] gi|281360373|ref|NP_001163084.1| cullin 4, isoform B [Drosophila melanogaster] gi|21627699|gb|AAF59135.2| cullin 4, isoform A [Drosophila melanogaster] gi|60678031|gb|AAX33522.1| LP02965p [Drosophila melanogaster] gi|211938571|gb|ACJ13182.1| FI05474p [Drosophila melanogaster] gi|272432386|gb|ACZ94363.1| cullin 4, isoform B …	NP_610352, NP_001163084, AAF59135, AAX33522, ACJ13182, ACZ94363	0	82.4742	1079.7	776	640	P:GO:0007095; P:GO:0007291; P:GO:0007476; P:GO:0045732; C:GO:0080008; P:GO:0007423; P:GO:0042787; P:GO:0048813; P:GO:0051533; F:GO:0031625; P:GO:0007307; P:GO:0009968; C:GO:0005737; P:GO:0045475; P:GO:0007409; P:GO:0045187; P:GO:0030431; C:GO:0031463; P:GO:0006919; C:GO:0035324	P:mitotic G2 DNA damage checkpoint; P:sperm individualization; P:imaginal disc-derived wing morphogenesis; P:positive regulation of protein catabolic process; C:Cul4-RING E3 ubiquitin ligase complex; P:sensory organ development; P:protein ubiquitination involved in ubiquitin-dependent protein catabolic process; P:dendrite morphogenesis; P:positive regulation of NFAT protein import into nucleus; F…	F:GO:0031625; C:GO:0031461; P:GO:0006511
TRINITY_GG_2720_c0_g1_i1	Lko057S001265	1	LOD1	GH09468p [Drosophila melanogaster]	4329	gi|15291145|gb|AAK92841.1|GH09468p [Drosophila melanogaster]	AAK92841	5.94e-08	55.2941	58.151	85	47			no GO terms
TRINITY_GG_2718_c2_g1_i1;TRINITY_GG_2718_c2_g1_i2	Lko057S001265	1	LOD1	histone deacetylase 6	7408	gi|386764457|ref|NP_001245681.1|histone deacetylase 6, isoform F [Drosophila melanogaster] gi|383293407|gb|AFH07395.1| histone deacetylase 6, isoform F [Drosophila melanogaster]	NP_001245681, AFH07395	0	68.5846	917.146	869	596	F:GO:0004407;C:GO:0005737;P:GO:0022904;P:GO:0006355;P:GO:0006099;P:GO:0016575;P:GO:0007269	F:histonedeacetylaseactivity;C:cytoplasm;P:respiratoryelectrontransportchain;P:regulationoftranscription,DNA-templated;P:tricarboxylicacidcycle;P:histonedeacetylation;P:neurotransmittersecretion	F:GO:0008270
TRINITY_GG_2715_c0_g1_i1;TRINITY_GG_2716_c1_g1_i1	Lko057S001265	1	LOD1	lectin-24A [Drosophila melanogaster]	283	gi|345452429|gb|AEN94452.1|lectin-24A [Drosophila melanogaster]	AEN94452	9.61e-08	55.4348	48.521	92	51	P:GO:0048085;F:GO:0030246;F:GO:0005534;F:GO:0005537;F:GO:0042806	P:adultchitin-containingcuticlepigmentation;F:carbohydratebinding;F:galactosebinding;F:mannosebinding;F:fucosebinding	noGOterms
TRINITY_GG_2714_c0_g1_i1	Lko057S001265	1	LOD1	lectin-24A [Drosophila melanogaster]	391	gi|345452423|gb|AEN94449.1|lectin-24A [Drosophila melanogaster] gi|345452435|gb|AEN94455.1| lectin-24A [Drosophila melanogaster]	AEN94449, AEN94455	5.19e-12	53.0435	62.003	115	61	P:GO:0032504; F:GO:0030246; C:GO:0005576; F:GO:0005534	P:multicellular organism reproduction; F:carbohydrate binding; C:extracellular region; F:galactose binding	no GO terms
TRINITY_GG_2722_c0_g1_i1;TRINITY_GG_2722_c1_g1_i1;TRINITY_GG_2722_c2_g1_i1	Lko057S001265	1	LOD1	Leucine-rich repeat kinase	2988	gi|442620116|ref|NP_001262771.1|Leucine-rich repeat kinase, isoform C [Drosophila melanogaster] gi|440217672|gb|AGB96151.1| Leucine-rich repeat kinase, isoform C [Drosophila melanogaster]	NP_001262771, AGB96151	1.25e-115	58.046	394.045	522	303	P:GO:0008088;P:GO:0040011;P:GO:0050808;P:GO:1900242;P:GO:1901215;F:GO:0004674;P:GO:0042147;C:GO:0005795;C:GO:0005765;C:GO:1990033;P:GO:0032418;C:GO:0031902;P:GO:0050774;P:GO:0051683;C:GO:0043198;P:GO:0006914;C:GO:0044297;P:GO:0018105;F:GO:0017137;P:GO:0007391;P:GO:0007293;P:GO:0043506;P:GO:0007476;P:GO:0007254;P:GO:0007611;P:GO:0048682;P:GO:0032147;P:GO:0000902;P:GO:0007300;P:GO:0090066;P:GO:0007…	P:axo-dendritictransport;P:locomotion;P:synapseorganization;P:regulationofsynapticvesicleendocytosis;P:negativeregulationofneurondeath;F:proteinserine/threoninekinaseactivity;P:retrogradetransport,endosometoGolgi;C:Golgistack;C:lysosomalmembrane;C:dendriticbranchpoint;P:lysosomelocalization;C:lateendosomemembrane;P:negativeregulationofdendritemorphogenesis;P:establishmentofGolgilocalization;C:den…	F:GO:0005515;F:GO:0005524;F:GO:0004672;P:GO:0006468
TRINITY_GG_2722_c3_g1_i1	Lko057S001265	1	LOD1	pyrexia	738	gi|24654624|ref|NP_612015.1|pyrexia, isoform A [Drosophila melanogaster] gi|62900887|sp|Q9W0T5.2|PYX_DROME RecName: Full=Transient receptor potential channel pyrexia gi|23092676|gb|AAF47356.2| pyrexia, isoform A [Drosophila melanogaster] gi|33636675|gb|AAQ23635.1| AT05393p [Drosophila melanogaster]	NP_612015, Q9W0T5, AAF47356, AAQ23635	1.02e-11	57.4074	65.0846	108	62	F:GO:0005261; P:GO:0048513; P:GO:0044763; C:GO:0005886; P:GO:0006813; C:GO:0098793; P:GO:0009408; F:GO:0005515; P:GO:0044087; P:GO:0006816; P:GO:0016043; C:GO:0034703; P:GO:0050877; P:GO:0048060; P:GO:0051128	F:cation channel activity; P:animal organ development; P:single-organism cellular process; C:plasma membrane; P:potassium ion transport; C:presynapse; P:response to heat; F:protein binding; P:regulation of cellular component biogenesis; P:calcium ion transport; P:cellular component organization; C:cation channel complex; P:neurological system process; P:negative gravitaxis; P:regulation of cellul…	F:GO:0005515
TRINITY_GG_2719_c0_g1_i1	Lko057S001265	1	LOD1	SD18286p [Drosophila melanogaster]	2888	gi|21430830|gb|AAM51093.1|SD18286p [Drosophila melanogaster]	AAM51093	6.94e-09	54.1096	58.9214	146	79	F:GO:0005515; P:GO:0007165; P:GO:0045087; P:GO:0006915; P:GO:0044237; P:GO:0044710; P:GO:0071704; C:GO:0005886; P:GO:0008105	F:protein binding; P:signal transduction; P:innate immune response; P:apoptotic process; P:cellular metabolic process; P:single-organism metabolic process; P:organic substance metabolic process; C:plasma membrane; P:asymmetric protein localization	F:GO:0005515; P:GO:0006955; C:GO:0016020; F:GO:0005164
TRINITY_GG_2713_c1_g1_i1;TRINITY_GG_2713_c1_g1_i2	Lko057S001265	1	LOD1	TBP-associated factor 13 [Drosophila melanogaster]	1707	gi|19921578|ref|NP_610024.1|TBP-associated factor 13 [Drosophila melanogaster] gi|7298660|gb|AAF53875.1| TBP-associated factor 13 [Drosophila melanogaster] gi|17946036|gb|AAL49061.1| RE52427p [Drosophila melanogaster] gi|1049300357|gb|ANY27122.1| GEO07843p1, partial [Drosophila melanogaster]	NP_610024, AAF53875, AAL49061, ANY27122	6.35e-54	96.8421	180.259	95	92	C:GO:0005669;F:GO:0001075;F:GO:0046982;P:GO:0006367	C:transcriptionfactorTFIIDcomplex;F:transcriptionfactoractivity,RNApolymeraseIIcorepromotersequence-specificbindinginvolvedinpreinitiationcomplexassembly;F:proteinheterodimerizationactivity;P:transcriptioninitiationfromRNApolymeraseIIpromoter	F:GO:0046982;P:GO:0006366
TRINITY_GG_2713_c0_g1_i1	Lko057S001265	1	LOD1	uncharacterized protein Dmel_CG11523 [Drosophila melanogaster]	1516	gi|24668519|ref|NP_649386.1|uncharacterized protein Dmel_CG11523 [Drosophila melanogaster] gi|7296531|gb|AAF51815.1| uncharacterized protein Dmel_CG11523 [Drosophila melanogaster] gi|21428344|gb|AAM49832.1| GM01793p [Drosophila melanogaster] gi|1049300745|gb|ANY27316.1| GEO05133p1, partial [Drosophila melanogaster]	NP_649386, AAF51815, AAM49832, ANY27316	9.77e-20	54.1667	87.0409	120	65	P:GO:0008150; C:GO:0005575; F:GO:0003674	P:biological_process; C:cellular_component; F:molecular_function	no GO terms
TRINITY_GG_2718_c4_g1_i1	Lko057S001265	1	LOD1	uncharacterized protein Dmel_CG45068 [Drosophila melanogaster]	3341	gi|665403448|ref|NP_001286840.1|uncharacterized protein Dmel_CG45068 [Drosophila melanogaster] gi|74865939|sp|Q8MT80.1|PIGZ_DROME RecName: Full=GPI mannosyltransferase 4; AltName: Full=GPI mannosyltransferase IV; Short=GPI-MT-IV gi|21391990|gb|AAM48349.1| LD06204p [Drosophila melanogaster] gi|599127425|gb|AHN56635.1| uncharacterized protein Dmel_CG45068 [Drosophila melanogaster]	NP_001286840, Q8MT80, AAM48349, AHN56635	1.12e-177	63.8138	538.11	666	425	F:GO:0000030	F:mannosyltransferase activity	F:GO:0016757
TRINITY_GG_10065_c5_g1_i1	Lko057S002439	1	LOD1	Dak1 [Drosophila melanogaster]	2278	gi|21356893|ref|NP_651456.1|Dak1 [Drosophila melanogaster] gi|7301434|gb|AAF56560.1| Dak1 [Drosophila melanogaster] gi|21429114|gb|AAM50276.1| LD46840p [Drosophila melanogaster] gi|31747231|gb|AAP57411.1| UMP-CMP kinase [Drosophila melanogaster]	NP_651456, AAF56560, AAM50276, AAP57411	2.83e-78	75.5208	253.062	192	145	C:GO:0005634; F:GO:0004127; F:GO:0009041; P:GO:0006207; P:GO:0009165; C:GO:0005739; P:GO:0032501	C:nucleus; F:cytidylate kinase activity; F:uridylate kinase activity; P:'de novo' pyrimidine nucleobase biosynthetic process; P:nucleotide biosynthetic process; C:mitochondrion; P:multicellular organismal process	F:GO:0005524; F:GO:0009041; F:GO:0004127; P:GO:0006207; P:GO:0006221; F:GO:0019205; P:GO:0006139
TRINITY_GG_6333_c10_g1_i1;TRINITY_GG_6333_c11_g1_i1	Lko057S000212	1	LOD2	RT02575p	257	gi|236752329|gb|ACQ91624.1|RT02575p, partial [Drosophila melanogaster]	ACQ91624	1.15e-20	65.4762	85.1149	84	55	P:GO:0061321;P:GO:0036059;P:GO:0007286;P:GO:0007157;P:GO:0007520;P:GO:0007156;P:GO:0060429;C:GO:0044459;P:GO:0007523;F:GO:0005515;P:GO:0048522;P:GO:0001745;C:GO:0005917;P:GO:0097206;P:GO:0030036;F:GO:0050839;P:GO:0061330;P:GO:0045747;C:GO:0005768;P:GO:1901739;F:GO:0030165;C:GO:0070765;P:GO:0010950;P:GO:0007220;P:GO:0046666;P:GO:0042067;C:GO:0009986;P:GO:0001751;C:GO:0005913;P:GO:0046331;P:GO:0016…	P:garlandnephrocytedifferentiation;P:nephrocytediaphragmassembly;P:spermatiddevelopment;P:heterophiliccell-celladhesionviaplasmamembranecelladhesionmolecules;P:myoblastfusion;P:homophiliccelladhesionviaplasmamembraneadhesionmolecules;P:epitheliumdevelopment;C:plasmamembranepart;P:larvalvisceralmuscledevelopment;F:proteinbinding;P:positiveregulationofcellularprocess;P:compoundeyemorphogenesis;C:ne…	noGOterms;noIPSmatch
TRINITY_GG_6333_c0_g1_i1;TRINITY_GG_6333_c2_g1_i1	Lko057S000212	1	LOD2	SNS [Drosophila melanogaster]	572	gi|8572742|gb|AAF77184.1|SNS [Drosophila melanogaster]	AAF77184	1.4e-47	64.9215	167.162	191	124	P:GO:0061321;P:GO:0036059;P:GO:0007286;P:GO:0035295;P:GO:0007157;P:GO:0007520;C:GO:0044444;P:GO:0007156;P:GO:0048523;P:GO:0048699;P:GO:0009966;C:GO:0044459;P:GO:0007523;P:GO:0030855;C:GO:0005912;F:GO:0005515;P:GO:0048522;P:GO:0001745;P:GO:0002009;C:GO:0005917;P:GO:0097206;P:GO:0030036;P:GO:2000026;C:GO:0005886	P:garlandnephrocytedifferentiation;P:nephrocytediaphragmassembly;P:spermatiddevelopment;P:tubedevelopment;P:heterophiliccell-celladhesionviaplasmamembranecelladhesionmolecules;P:myoblastfusion;C:cytoplasmicpart;P:homophiliccelladhesionviaplasmamembraneadhesionmolecules;P:negativeregulationofcellularprocess;P:generationofneurons;P:regulationofsignaltransduction;C:plasmamembranepart;P:larvalviscera…	F:GO:0005515;noGOterms
TRINITY_GG_6332_c0_g1_i1;TRINITY_GG_6332_c0_g1_i2	Lko057S000212	1	LOD2	Sprouty-related protein with EVH-1 domain	3146	gi|19922268|ref|NP_610988.1|Sprouty-related protein with EVH-1 domain, isoform A [Drosophila melanogaster] gi|17863068|gb|AAL40011.1| SD10629p [Drosophila melanogaster] gi|21627183|gb|AAF58207.2| Sprouty-related protein with EVH-1 domain, isoform A [Drosophila melanogaster]	NP_610988, AAL40011, AAF58207	1.51e-117	61.3744	369.392	422	259	P:GO:0007391;P:GO:0065008;C:GO:0031252;P:GO:0040011;P:GO:0002064;P:GO:0048513;P:GO:0009966;P:GO:0051489;P:GO:0050793;F:GO:0005515;P:GO:0032956;P:GO:0051179;P:GO:0006928;P:GO:0048477;C:GO:0044463;P:GO:0007409;C:GO:0016020;C:GO:0005829;C:GO:0030054;P:GO:0030036;C:GO:0030424;P:GO:0031346	P:dorsalclosure;P:regulationofbiologicalquality;C:cellleadingedge;P:locomotion;P:epithelialcelldevelopment;P:animalorgandevelopment;P:regulationofsignaltransduction;P:regulationoffilopodiumassembly;P:regulationofdevelopmentalprocess;F:proteinbinding;P:regulationofactincytoskeletonorganization;P:localization;P:movementofcellorsubcellularcomponent;P:oogenesis;C:cellprojectionpart;P:axonogenesis;C:m…	noGOterms
TRINITY_GG_6333_c8_g1_i1	Lko057S000212	1	LOD2	sticks and stones	269	gi|116007672|ref|NP_001036532.1|sticks and stones, isoform B [Drosophila melanogaster] gi|113194638|gb|ABI31083.1| sticks and stones, isoform B [Drosophila melanogaster]	NP_001036532, ABI31083	1.2e-18	81.1321	79.7221	53	43	P:GO:0061321; P:GO:0036059; P:GO:0007220; P:GO:0007286; P:GO:0061330; P:GO:0007157; P:GO:0007520; P:GO:0042067; P:GO:0007156; P:GO:0045747; P:GO:0007523; P:GO:0001751; C:GO:0005768; F:GO:0005515; C:GO:0005913; C:GO:0005917; C:GO:0070765; P:GO:0097206; P:GO:0016202; P:GO:0030036; C:GO:0016324; P:GO:0010950	P:garland nephrocyte differentiation; P:nephrocyte diaphragm assembly; P:Notch receptor processing; P:spermatid development; P:Malpighian tubule stellate cell differentiation; P:heterophilic cell-cell adhesion via plasma membrane cell adhesion molecules; P:myoblast fusion; P:establishment of ommatidial planar polarity; P:homophilic cell adhesion via plasma membrane adhesion molecules; P:positive …	no GO terms
TRINITY_GG_7534_c1_g1_i1	Lko057S000500	1	LOD2	AChain A, Crystal Structure Of D. Melanogaster Rab6 Gtpase Bound To Gmppnp	861	gi|339717366|pdb|2Y8E|AChain A, Crystal Structure Of D. Melanogaster Rab6 Gtpase Bound To Gmppnp gi|339717367|pdb|2Y8E|B Chain B, Crystal Structure Of D. Melanogaster Rab6 Gtpase Bound To Gmppnp	2Y8E, 2Y8E	1.49e-115	98.773	330.872	163	161	P:GO:0035088; P:GO:0007293; C:GO:0008021; P:GO:0008582; P:GO:0007295; P:GO:0007015; P:GO:0007411; P:GO:0008103; C:GO:0005794; P:GO:0007298; C:GO:0043025; P:GO:0006325; P:GO:0030866; C:GO:0045178; P:GO:0048488; F:GO:0003924; P:GO:0045175; P:GO:0045494; P:GO:0045451; P:GO:0030100; P:GO:0050832; P:GO:0060078; P:GO:0007220; P:GO:0032482; P:GO:0007067; P:GO:0046664; P:GO:1990182; P:GO:0007349; C:GO:00…	P:establishment or maintenance of apical/basal cell polarity; P:germarium-derived egg chamber formation; C:synaptic vesicle; P:regulation of synaptic growth at neuromuscular junction; P:growth of a germarium-derived egg chamber; P:actin filament organization; P:axon guidance; P:oocyte microtubule cytoskeleton polarization; C:Golgi apparatus; P:border follicle cell migration; C:neuronal cell body;…	F:GO:0005525; F:GO:0003924
TRINITY_GG_7534_c0_g1_i1;TRINITY_GG_7534_c0_g1_i2	Lko057S000500	1	LOD2	CG9288 [Drosophila melanogaster]	973	gi|21358197|ref|NP_650316.1|CG9288 [Drosophila melanogaster] gi|74947893|sp|Q9VFR1.1|F206_DROME RecName: Full=FAM206 family protein CG9288 gi|7299810|gb|AAF54989.1| CG9288 [Drosophila melanogaster] gi|17862500|gb|AAL39727.1| LD32260p2 [Drosophila melanogaster]	NP_650316, Q9VFR1, AAF54989, AAL39727	1.39e-24	57.732	99.7525	194	112			noGOterms
TRINITY_GG_7533_c0_g1_i1;TRINITY_GG_7533_c0_g1_i2	Lko057S000500	1	LOD2	kurtz	4071	gi|17998687|ref|NP_524988.1|kurtz, isoform A [Drosophila melanogaster] gi|386766862|ref|NP_001247400.1| kurtz, isoform B [Drosophila melanogaster] gi|6942223|gb|AAF32365.1|AF221066_1 kurtz arrestin [Drosophila melanogaster] gi|7302112|gb|AAF57212.1| kurtz, isoform A [Drosophila melanogaster] gi|21430256|gb|AAM50806.1| LD31082p [Drosophila melanogaster] gi|383293059|gb|AFH06717.1| kurtz, isoform B…	NP_524988, NP_001247400, AAF32365, AAF57212, AAM50806, AFH06717	0	82.5	617.846	440	363	C:GO:0016029;P:GO:0060189;P:GO:0035641;P:GO:0050728;P:GO:0061099;P:GO:0045751;P:GO:0006897;P:GO:0045746;P:GO:0042335;C:GO:0005886;F:GO:0002046;P:GO:0002168;P:GO:0007369;P:GO:0007605;P:GO:0016060;P:GO:0031647;P:GO:0016062;P:GO:0045494;P:GO:0019233;P:GO:0035204	C:subrhabdomeralcisterna;P:positiveregulationofproteindesumoylation;P:locomotoryexplorationbehavior;P:negativeregulationofinflammatoryresponse;P:negativeregulationofproteintyrosinekinaseactivity;P:negativeregulationofTollsignalingpathway;P:endocytosis;P:negativeregulationofNotchsignalingpathway;P:cuticledevelopment;C:plasmamembrane;F:opsinbinding;P:instarlarvaldevelopment;P:gastrulation;P:sensory…	P:GO:0007165
TRINITY_GG_7525_c0_g1_i1	Lko057S000500	1	LOD2	PREDICTED: uncharacterized protein LOC107036473 isoform X6 [Diachasma alloeum]	1675	gi|970889459|ref|XP_015109942.1|PREDICTED: uncharacterized protein LOC107036473 isoform X6 [Diachasma alloeum]	XP_015109942	0.000364	81.0345	50.8322	58	47			no IPS match
TRINITY_GG_7532_c0_g1_i1	Lko057S000500	1	LOD2	putative tumor suppressor homolog [Drosophila melanogaster]	227	gi|3435314|gb|AAC32397.1|putative tumor suppressor homolog [Drosophila melanogaster]	AAC32397	1.71e-30	84.2857	112.464	70	59	P:GO:0015014; P:GO:0050808; F:GO:0050508; F:GO:0050509; P:GO:0007224; P:GO:0007411; C:GO:0005783; C:GO:0005794; P:GO:0006044; P:GO:0008101; P:GO:0008354; P:GO:0008589; P:GO:0030206; F:GO:0005515; P:GO:0048312; P:GO:0048488; C:GO:0016021; P:GO:0016055; P:GO:0030210	P:heparan sulfate proteoglycan biosynthetic process, polysaccharide chain biosynthetic process; P:synapse organization; F:glucuronosyl-N-acetylglucosaminyl-proteoglycan 4-alpha-N-acetylglucosaminyltransferase activity; F:N-acetylglucosaminyl-proteoglycan 4-beta-glucuronosyltransferase activity; P:smoothened signaling pathway; P:axon guidance; C:endoplasmic reticulum; C:Golgi apparatus; P:N-acetyl…	no IPS match
TRINITY_GG_7534_c1_g1_i2;TRINITY_GG_7534_c1_g1_i3	Lko057S000500	1	LOD2	Rab6	2004	gi|17137220|ref|NP_477172.1|Rab6, isoform A [Drosophila melanogaster] gi|665407767|ref|NP_001285869.1| Rab6, isoform B [Drosophila melanogaster] gi|74958204|sp|O18334.1|RAB6_DROME RecName: Full=Ras-related protein Rab6; AltName: Full=Protein warthog gi|2313037|dbj|BAA21707.1| rab6 [Drosophila melanogaster] gi|7297923|gb|AAF53168.1| Rab6, isoform A [Drosophila melanogaster] gi|16648070|gb|AAL25300…	NP_477172, NP_001285869, O18334, BAA21707, AAF53168, AAL25300, AHN54383	6.41e-142	97.1014	413.305	207	201	P:GO:0035088;P:GO:0007293;C:GO:0008021;P:GO:0008582;P:GO:0007295;P:GO:0007015;P:GO:0007411;P:GO:0008103;P:GO:0007298;C:GO:0043025;P:GO:0006325;P:GO:0030866;C:GO:0045178;P:GO:0048488;F:GO:0003924;P:GO:0045175;P:GO:0045494;P:GO:0045451;P:GO:0030100;P:GO:0050832;P:GO:0060078;P:GO:0007220;P:GO:0032482;P:GO:0007067;P:GO:0046664;P:GO:1990182;P:GO:0007349;C:GO:0005886;P:GO:0048803;P:GO:0006888;P:GO:0010…	P:establishmentormaintenanceofapical/basalcellpolarity;P:germarium-derivedeggchamberformation;C:synapticvesicle;P:regulationofsynapticgrowthatneuromuscularjunction;P:growthofagermarium-derivedeggchamber;P:actinfilamentorganization;P:axonguidance;P:oocytemicrotubulecytoskeletonpolarization;P:borderfolliclecellmigration;C:neuronalcellbody;P:chromatinorganization;P:corticalactincytoskeletonorganizat…	F:GO:0005525;F:GO:0003924
TRINITY_GG_7536_c1_g1_i1	Lko057S000500	1	LOD2	tout-velu	742	gi|442623686|ref|NP_001260972.1|tout-velu, isoform C [Drosophila melanogaster] gi|295913034|gb|ADG57806.1| MIP20656p [Drosophila melanogaster] gi|440214387|gb|AGB93504.1| tout-velu, isoform C [Drosophila melanogaster]	NP_001260972, ADG57806, AGB93504	4.51e-115	82.449	332.413	245	202	P:GO:0015014; P:GO:0050808; F:GO:0050508; F:GO:0050509; P:GO:0007224; P:GO:0007411; C:GO:0005783; C:GO:0005794; P:GO:0006044; P:GO:0008101; P:GO:0008354; P:GO:0008589; P:GO:0030206; F:GO:0005515; P:GO:0048312; P:GO:0048488; C:GO:0016021; P:GO:0016055; P:GO:0030210	P:heparan sulfate proteoglycan biosynthetic process, polysaccharide chain biosynthetic process; P:synapse organization; F:glucuronosyl-N-acetylglucosaminyl-proteoglycan 4-alpha-N-acetylglucosaminyltransferase activity; F:N-acetylglucosaminyl-proteoglycan 4-beta-glucuronosyltransferase activity; P:smoothened signaling pathway; P:axon guidance; C:endoplasmic reticulum; C:Golgi apparatus; P:N-acetyl…	F:GO:0016757; C:GO:0016021
TRINITY_GG_7662_c0_g1_i1	Lko057S000529	1	LOD2	cueball [Drosophila melanogaster]	3115	gi|28574998|ref|NP_612113.2|cueball [Drosophila melanogaster] gi|74866435|sp|Q95RU0.1|CUE_DROME RecName: Full=Protein cueball; Flags: Precursor gi|16768936|gb|AAL28687.1| LD11871p [Drosophila melanogaster] gi|28380418|gb|AAF47503.2| cueball [Drosophila melanogaster]	NP_612113, Q95RU0, AAL28687, AAF47503	1.22e-32	41.0204	136.346	490	201	P:GO:0048731; C:GO:0016020; P:GO:0007166; C:GO:0044444; P:GO:0044763; F:GO:0005488	P:system development; C:membrane; P:cell surface receptor signaling pathway; C:cytoplasmic part; P:single-organism cellular process; F:binding	no GO terms
TRINITY_GG_7668_c0_g1_i1	Lko057S000529	1	LOD2	flapwing	1404	gi|17864332|ref|NP_524738.1|flapwing, isoform B [Drosophila melanogaster] gi|442615786|ref|NP_001259407.1| flapwing, isoform C [Drosophila melanogaster] gi|1346761|sp|P48462.1|PP1B_DROME RecName: Full=Serine/threonine-protein phosphatase beta isoform; AltName: Full=Protein flap wing gi|8368|emb|CAA39821.1| protein phosphatase 1 [Drosophila melanogaster] gi|6138976|emb|CAB59732.1| type 1 serine/th…	NP_524738, NP_001259407, P48462, CAA39821, CAB59732, AAF46583, AFA28437, AGB95250	3.75e-144	78.8927	416.387	289	228	P:GO:0007476; P:GO:0007498; P:GO:0007312; P:GO:0007411; P:GO:0046579; P:GO:0008344; P:GO:0008542; C:GO:0005700; P:GO:0051225; C:GO:0000164; P:GO:0031991; P:GO:0050829; P:GO:0006470; P:GO:0030261; P:GO:0090263; P:GO:0007301; P:GO:0008355; P:GO:1904886; P:GO:0046329; C:GO:0005634; P:GO:0046692; P:GO:0045089; P:GO:0014706; P:GO:0070374; P:GO:0006909; P:GO:0007080; F:GO:0017018	P:imaginal disc-derived wing morphogenesis; P:mesoderm development; P:oocyte nucleus migration involved in oocyte dorsal/ventral axis specification; P:axon guidance; P:positive regulation of Ras protein signal transduction; P:adult locomotory behavior; P:visual learning; C:polytene chromosome; P:spindle assembly; C:protein phosphatase type 1 complex; P:regulation of actomyosin contractile ring co…	F:GO:0016787
TRINITY_GG_7664_c8_g1_i1	Lko057S000529	1	LOD2	hypothetical protein L798_11233 [Zootermopsis nevadensis]	492	gi|646708762|gb|KDR14927.1|hypothetical protein L798_11233 [Zootermopsis nevadensis]	KDR14927	1.4e-07	73.0769	58.151	52	38	C:GO:0016021	C:integral component of membrane	no GO terms
TRINITY_GG_7664_c6_g1_i1	Lko057S000529	1	LOD2	hypothetical protein Phum_PHUM294490 [Pediculus humanus corporis]	410	gi|242012783|ref|XP_002427107.1|hypothetical protein Phum_PHUM294490 [Pediculus humanus corporis] gi|212511365|gb|EEB14369.1| hypothetical protein Phum_PHUM294490 [Pediculus humanus corporis]	XP_002427107, EEB14369	9.53e-05	60.3175	48.9062	63	38	C:GO:0016020; C:GO:0016021	C:membrane; C:integral component of membrane	no GO terms
TRINITY_GG_7670_c0_g1_i1	Lko057S000529	1	LOD2	hypothetical protein RF55_16973 [Lasius niger]	227	gi|861608762|gb|KMQ84872.1|hypothetical protein RF55_16973 [Lasius niger]	KMQ84872	4.2e-16	68.1159	75.0998	69	47	F:GO:0003677; P:GO:0015074; P:GO:0006313	F:DNA binding; P:DNA integration; P:transposition, DNA-mediated	no IPS match
TRINITY_GG_7666_c0_g1_i2;TRINITY_GG_7666_c0_g1_i3;TRINITY_GG_7666_c0_g1_i5	Lko057S000529	1	LOD2	IP14007p [Drosophila melanogaster]	2203	gi|116875735|gb|ABK30917.1|IP14007p [Drosophila melanogaster]	ABK30917	1.58e-115	71.8475	376.711	341	245	C:GO:0071203;P:GO:0051726;P:GO:0042246	C:WASHcomplex;P:regulationofcellcycle;P:tissueregeneration	C:GO:0071203
TRINITY_GG_7664_c11_g1_i1	Lko057S000529	1	LOD2	MIP13840p	245	gi|262399421|gb|ACY65493.1|MIP13840p, partial [Drosophila melanogaster]	ACY65493	1.12e-12	64.7887	62.003	71	46	F:GO:0003779	F:actin binding	no IPS match
TRINITY_GG_7666_c1_g1_i1	Lko057S000529	1	LOD2	RE48314p [Drosophila melanogaster]	1945	gi|41058078|gb|AAR99103.1|RE48314p [Drosophila melanogaster]	AAR99103	1.12e-19	50	95.1301	234	117	P:GO:0009790; P:GO:0048729; P:GO:0008078; P:GO:0007165; P:GO:0035295; F:GO:0043167; P:GO:0007498; P:GO:0007411; P:GO:0048646; P:GO:0048732; P:GO:0060429; P:GO:0090130; P:GO:0044765; P:GO:0009887; P:GO:0048813; P:GO:0007507; F:GO:0005515; P:GO:0010632; C:GO:0031012	P:embryo development; P:tissue morphogenesis; P:mesodermal cell migration; P:signal transduction; P:tube development; F:ion binding; P:mesoderm development; P:axon guidance; P:anatomical structure formation involved in morphogenesis; P:gland development; P:epithelium development; P:tissue migration; P:single-organism transport; P:animal organ morphogenesis; P:dendrite morphogenesis; P:heart devel…	F:GO:0005515
TRINITY_GG_7666_c0_g1_i1;TRINITY_GG_7666_c0_g1_i4;TRINITY_GG_7666_c0_g1_i6	Lko057S000529	1	LOD2	strumpellin	5816	gi|24665042|ref|NP_648840.1|strumpellin, isoform A [Drosophila melanogaster] gi|281366305|ref|NP_001163454.1| strumpellin, isoform B [Drosophila melanogaster] gi|74871102|sp|Q9VUY8.1|WASC5_DROME RecName: Full=WASH complex subunit homolog 5; AltName: Full=WASH complex subunit strumpellin homolog gi|7294181|gb|AAF49534.1| strumpellin, isoform A [Drosophila melanogaster] gi|272455215|gb|ACZ94725.1| …	NP_648840, NP_001163454, Q9VUY8, AAF49534, ACZ94725, ADB91410	0	66.4996	1029.62	1197	796	P:GO:0046331;C:GO:0044464;P:GO:0019233;P:GO:0051726;P:GO:0042059;P:GO:0042246	P:lateralinhibition;C:cellpart;P:sensoryperceptionofpain;P:regulationofcellcycle;P:negativeregulationofepidermalgrowthfactorreceptorsignalingpathway;P:tissueregeneration	C:GO:0071203
TRINITY_GG_7664_c12_g1_i1	Lko057S000529	1	LOD2	uncharacterized protein Dmel_CG45186	285	gi|665409700|ref|NP_001286917.1|uncharacterized protein Dmel_CG45186, isoform AC [Drosophila melanogaster] gi|599131106|gb|AHN57942.1| uncharacterized protein Dmel_CG45186, isoform AC [Drosophila melanogaster]	NP_001286917, AHN57942	0.000343	50	38.891	74	37	F:GO:0051015; P:GO:0008150; F:GO:0003779; P:GO:0007010; C:GO:0005575	F:actin filament binding; P:biological_process; F:actin binding; P:cytoskeleton organization; C:cellular_component	no IPS match
TRINITY_GG_7734_c0_g1_i1	Lko057S000550	1	LOD2	BChain B, Crystal Structure Of The Pumilio-nos-cyclinb Rna Complex	1247	gi|1059271648|pdb|5KL8|BChain B, Crystal Structure Of The Pumilio-nos-cyclinb Rna Complex	5KL8	4.86e-14	64.1509	68.9366	53	34			no GO terms
TRINITY_GG_7746_c1_g1_i1	Lko057S000550	1	LOD2	CG3344 [Drosophila melanogaster]	2502	gi|19923012|ref|NP_612051.1|CG3344 [Drosophila melanogaster] gi|7291990|gb|AAF47405.1| CG3344 [Drosophila melanogaster] gi|15291435|gb|AAK92986.1| GH21114p [Drosophila melanogaster]	NP_612051, AAF47405, AAK92986	1.37e-134	65.3846	408.683	416	272	C:GO:0071011; P:GO:0030097; F:GO:0003729; P:GO:0042386; P:GO:0000398	C:precatalytic spliceosome; P:hemopoiesis; F:mRNA binding; P:hemocyte differentiation; P:mRNA splicing, via spliceosome	P:GO:0006508; F:GO:0004185
TRINITY_GG_7733_c0_g1_i1	Lko057S000550	1	LOD2	CG3726	4750	gi|24640007|ref|NP_572279.1|CG3726, isoform A [Drosophila melanogaster] gi|20152007|gb|AAM11363.1| LD26392p [Drosophila melanogaster] gi|22831779|gb|AAF46102.2| CG3726, isoform A [Drosophila melanogaster]	NP_572279, AAM11363, AAF46102	1.44e-51	85.3659	195.667	123	105	P:GO:0035001; P:GO:0035167; P:GO:0044719; F:GO:0000978; P:GO:0007298; P:GO:0007530; P:GO:0043388; P:GO:0002121; F:GO:0000980; C:GO:0005700; F:GO:0001078; P:GO:0007526; F:GO:1990841; P:GO:0045892; P:GO:0048047; P:GO:0046661; P:GO:0001709; P:GO:0040003; P:GO:0035151; P:GO:0007422; P:GO:0007620; P:GO:0007464; P:GO:0007426; P:GO:0031987; P:GO:0010906; P:GO:0048053; F:GO:0046872; C:GO:0017053; P:GO:00…	P:dorsal trunk growth, open tracheal system; P:larval lymph gland hemopoiesis; P:regulation of imaginal disc-derived wing size; F:RNA polymerase II core promoter proximal region sequence-specific DNA binding; P:border follicle cell migration; P:sex determination; P:positive regulation of DNA binding; P:inter-male aggressive behavior; F:RNA polymerase II distal enhancer sequence-specific DNA bindi…	F:GO:0005515
TRINITY_GG_7746_c3_g1_i1	Lko057S000550	1	LOD2	CSN9_DROMERecName: Full=COP9 signalosome complex subunit 9 homolog	752	gi|187609769|sp|Q7JVR7.2|CSN9_DROMERecName: Full=COP9 signalosome complex subunit 9 homolog	Q7JVR7	1.02e-08	84.0909	51.6026	44	37	P:GO:0051726	P:regulation of cell cycle	no IPS match
TRINITY_GG_7735_c0_g1_i1	Lko057S000550	1	LOD2	DnaJ-like-1	1397	gi|24658555|ref|NP_523936.2|DnaJ-like-1, isoform A [Drosophila melanogaster] gi|24658562|ref|NP_729086.1| DnaJ-like-1, isoform B [Drosophila melanogaster] gi|13124719|sp|Q24133.3|DNAJ1_DROME RecName: Full=DnaJ protein homolog 1; Short=DROJ1 gi|7295437|gb|AAF50753.1| DnaJ-like-1, isoform A [Drosophila melanogaster] gi|16186209|gb|AAL14017.1| SD08787p [Drosophila melanogaster] gi|23094114|gb|AAN121…	NP_523936, NP_729086, Q24133, AAF50753, AAL14017, AAN12104, AAP31278, AAP31280, AAP31281, AAP31282, AAP31283, AAP31284, AAP31285, AAP31286, AAP31287, AAP31288	6.35e-65	54.955	213.386	333	183	C:GO:0005739; C:GO:0005829; P:GO:0007224; P:GO:0030431; F:GO:0005113	C:mitochondrion; C:cytosol; P:smoothened signaling pathway; P:sleep; F:patched binding	F:GO:0051082; P:GO:0006457
TRINITY_GG_7743_c1_g1_i1	Lko057S000550	1	LOD2	F-box synaptic protein	1069	gi|24653306|ref|NP_610849.1|F-box synaptic protein, isoform A [Drosophila melanogaster] gi|24653308|ref|NP_725266.1| F-box synaptic protein, isoform B [Drosophila melanogaster] gi|74947490|sp|Q9V6L9.1|FBSP1_DROME RecName: Full=F-box/SPRY domain-containing protein 1; Short=DFsn gi|7303345|gb|AAF58404.1| F-box synaptic protein, isoform A [Drosophila melanogaster] gi|21428606|gb|AAM49963.1| LD47425p…	NP_610849, NP_725266, Q9V6L9, AAF58404, AAM49963, AAM68601	2.78e-155	92.549	437.187	255	236	P:GO:0007274; P:GO:0045732; P:GO:0045886; P:GO:0046843; P:GO:0007314; C:GO:0005634; F:GO:0004842; F:GO:0005515; C:GO:0005938; C:GO:0045495; P:GO:0031146; C:GO:0019005; C:GO:0031466	P:neuromuscular synaptic transmission; P:positive regulation of protein catabolic process; P:negative regulation of synaptic growth at neuromuscular junction; P:dorsal appendage formation; P:oocyte anterior/posterior axis specification; C:nucleus; F:ubiquitin-protein transferase activity; F:protein binding; C:cell cortex; C:pole plasm; P:SCF-dependent proteasomal ubiquitin-dependent protein catab…	F:GO:0005515
TRINITY_GG_7746_c4_g1_i1	Lko057S000550	1	LOD2	mature acetylcholine receptor alpha-like subunit [Drosophila melanogaster]	2014	gi|7576|emb|CAA30172.1|mature acetylcholine receptor alpha-like subunit [Drosophila melanogaster]	CAA30172	1.35e-44	61.3445	169.088	238	146	C:GO:0014069; P:GO:0007271; P:GO:0046716; P:GO:0060079; F:GO:0015464; P:GO:0007630; F:GO:0042166; C:GO:0005892; P:GO:0007632; P:GO:0006812; P:GO:0017085; C:GO:0043197; P:GO:0030431	C:postsynaptic density; P:synaptic transmission, cholinergic; P:muscle cell cellular homeostasis; P:excitatory postsynaptic potential; F:acetylcholine receptor activity; P:jump response; F:acetylcholine binding; C:acetylcholine-gated channel complex; P:visual behavior; P:cation transport; P:response to insecticide; C:dendritic spine; P:sleep	P:GO:0006811; C:GO:0016021; F:GO:0005230
TRINITY_GG_7744_c1_g1_i1	Lko057S000550	1	LOD2	MIP12205p	782	gi|242397555|gb|ACS92867.1|MIP12205p, partial [Drosophila melanogaster]	ACS92867	1.4e-18	50.9677	85.8853	155	79	C:GO:0005737; P:GO:0006366; F:GO:0003674	C:cytoplasm; P:transcription from RNA polymerase II promoter; F:molecular_function	no IPS match
TRINITY_GG_7739_c0_g1_i1	Lko057S000550	1	LOD2	mitochondrial ribosomal protein L24 [Drosophila melanogaster]	1041	gi|17647677|ref|NP_523476.1|mitochondrial ribosomal protein L24 [Drosophila melanogaster] gi|74948247|sp|Q9VMY1.1|RM24_DROME RecName: Full=Probable 39S ribosomal protein L24, mitochondrial; Short=L24mt; Short=MRP-L24; Flags: Precursor gi|7296903|gb|AAF52176.1| mitochondrial ribosomal protein L24 [Drosophila melanogaster] gi|20151985|gb|AAM11352.1| LD05344p [Drosophila melanogaster]	NP_523476, Q9VMY1, AAF52176, AAM11352	1.5e-104	76.1905	307.76	252	192	F:GO:0003735; P:GO:0019233; P:GO:0032543; C:GO:0005762	F:structural constituent of ribosome; P:sensory perception of pain; P:mitochondrial translation; C:mitochondrial large ribosomal subunit	F:GO:0003735; C:GO:0005840; C:GO:0005622; P:GO:0006412
TRINITY_GG_7745_c0_g1_i1	Lko057S000550	1	LOD2	nicotinic acetylcholine receptor beta1	529	gi|24657653|ref|NP_523927.2|nicotinic acetylcholine receptor beta1, isoform A [Drosophila melanogaster] gi|1065712|emb|CAA30778.1| unnamed protein product [Drosophila melanogaster] gi|7292497|gb|AAF47900.1| nicotinic acetylcholine receptor beta1, isoform A [Drosophila melanogaster] gi|323301256|gb|ADX35970.1| RE35042p [Drosophila melanogaster] gi|226072|prf||1410208A nicotinic acetylcholine recep…	NP_523927, CAA30778, AAF47900, ADX35970,	1.41e-17	62.3853	80.1073	109	68	P:GO:0007271; P:GO:0046716; F:GO:0015464; P:GO:0006812; C:GO:0045211; P:GO:0017085; P:GO:0030431; C:GO:0005892	P:synaptic transmission, cholinergic; P:muscle cell cellular homeostasis; F:acetylcholine receptor activity; P:cation transport; C:postsynaptic membrane; P:response to insecticide; P:sleep; C:acetylcholine-gated channel complex	P:GO:0006811; C:GO:0016021; F:GO:0005230
TRINITY_GG_7737_c0_g1_i1	Lko057S000550	1	LOD2	PO11_BRACO Retrovirus-related Pol polyprotein from type-1 retrotransposable element R1 (Fragment) OS=Bradysia coprophila PE=3 SV=1	433	gnl|BL_ORD_ID|16874sp|Q03277|PO11_BRACO Retrovirus-related Pol polyprotein from type-1 retrotransposable element R1 (Fragment) OS=Bradysia coprophila PE=3 SV=1	16874	6.47e-09	52.1368	53.1434	117	61			no IPS match
TRINITY_GG_7737_c1_g1_i1	Lko057S000550	1	LOD2	PO12_NASVI Retrovirus-related Pol polyprotein from type-1 retrotransposable element R1 2 (Fragment) OS=Nasonia vitripennis PE=3 SV=1	224	gnl|BL_ORD_ID|16877sp|Q03270|PO12_NASVI Retrovirus-related Pol polyprotein from type-1 retrotransposable element R1 2 (Fragment) OS=Nasonia vitripennis PE=3 SV=1	16877	0.000158	69.4444	37.7354	36	25			no IPS match
TRINITY_GG_7742_c1_g1_i1	Lko057S000550	1	LOD2	pol protein [Drosophila melanogaster]	339	gi|47231636|gb|AAT12845.1|pol protein [Drosophila melanogaster]	AAT12845	0.000808	58.8235	32.7278	34	20			no IPS match
TRINITY_GG_7742_c0_g1_i1	Lko057S000550	1	LOD2	RTJK_DROMERecName: Full=RNA-directed DNA polymerase from mobile element jockey; AltName: Full=Reverse transcriptase	383	gi|134083|sp|P21328.1|RTJK_DROMERecName: Full=RNA-directed DNA polymerase from mobile element jockey; AltName: Full=Reverse transcriptase gi|157825|gb|AAA28675.1| ORF2, reverse transcriptase (put.); putative [Drosophila melanogaster]	P21328, AAA28675	1.81e-07	56.338	49.2914	71	40			no IPS match
TRINITY_GG_7749_c0_g1_i1;TRINITY_GG_7749_c0_g1_i2	Lko057S000550	1	LOD2	spinster	2465	gi|17864456|ref|NP_524823.1|spinster, isoform D [Drosophila melanogaster] gi|12003972|gb|AAG43826.1|AF212367_1 spinster type II [Drosophila melanogaster] gi|21645347|gb|AAM70952.1| spinster, isoform D [Drosophila melanogaster]	NP_524823, AAG43826, AAM70952	0	65.6637	551.206	565	371	P:GO:0007040;P:GO:0045924;P:GO:0008582;P:GO:0007422;P:GO:0090099;P:GO:0008333;P:GO:0045476;P:GO:0009267;P:GO:0035193;P:GO:0045477;P:GO:0008347;P:GO:0048488;P:GO:0007619;C:GO:0031982;P:GO:0010001	P:lysosomeorganization;P:regulationoffemalereceptivity;P:regulationofsynapticgrowthatneuromuscularjunction;P:peripheralnervoussystemdevelopment;P:negativeregulationofdecapentaplegicsignalingpathway;P:endosometolysosometransport;P:nursecellapoptoticprocess;P:cellularresponsetostarvation;P:larvalcentralnervoussystemremodeling;P:regulationofnursecellapoptoticprocess;P:glialcellmigration;P:synapticve…	P:GO:0055085;C:GO:0016021
TRINITY_GG_7744_c0_g1_i1	Lko057S000550	1	LOD2	uncharacterized protein Dmel_CG32104 [Drosophila melanogaster]	4071	gi|24663263|ref|NP_648573.2|uncharacterized protein Dmel_CG32104 [Drosophila melanogaster] gi|23093603|gb|AAF49924.2| uncharacterized protein Dmel_CG32104 [Drosophila melanogaster] gi|383505556|gb|AFH36357.1| FI19811p1 [Drosophila melanogaster]	NP_648573, AAF49924, AFH36357	2.27e-53	42.4007	206.453	1158	491	F:GO:0003676; C:GO:0005737; P:GO:0006366; F:GO:0008168; C:GO:0005575; F:GO:0003674; P:GO:0032259	F:nucleic acid binding; C:cytoplasm; P:transcription from RNA polymerase II promoter; F:methyltransferase activity; C:cellular_component; F:molecular_function; P:methylation	no GO terms
TRINITY_GG_7747_c0_g1_i1	Lko057S000550	1	LOD2	uncharacterized protein Dmel_CG34132 [Drosophila melanogaster]	645	gi|116007296|ref|NP_001036344.1|uncharacterized protein Dmel_CG34132 [Drosophila melanogaster] gi|113194965|gb|ABI31298.1| uncharacterized protein Dmel_CG34132 [Drosophila melanogaster] gi|124248426|gb|ABM92833.1| IP17640p [Drosophila melanogaster] gi|124248432|gb|ABM92836.1| IP17740p [Drosophila melanogaster] gi|1049301105|gb|ANY27496.1| GEO11073p1, partial [Drosophila melanogaster]	NP_001036344, ABI31298, ABM92833, ABM92836, ANY27496	2.44e-42	89.0244	138.658	82	73	C:GO:0005744; F:GO:0015450; P:GO:0045039	C:mitochondrial inner membrane presequence translocase complex; F:P-P-bond-hydrolysis-driven protein transmembrane transporter activity; P:protein import into mitochondrial inner membrane	no GO terms
TRINITY_GG_8230_c4_g1_i1	Lko057S000656	1	LOD2	KCNQ potassium channel	251	gi|281363097|ref|NP_788300.3|KCNQ potassium channel, isoform F [Drosophila melanogaster] gi|272432426|gb|AAF58829.5| KCNQ potassium channel, isoform F [Drosophila melanogaster]	NP_788300, AAF58829	2.6e-29	88.0597	109.768	67	59	P:GO:0006813; F:GO:0005249; P:GO:0002027; P:GO:0055085; P:GO:0001700; C:GO:0008076; P:GO:0019233; P:GO:0060048	P:potassium ion transport; F:voltage-gated potassium channel activity; P:regulation of heart rate; P:transmembrane transport; P:embryonic development via the syncytial blastoderm; C:voltage-gated potassium channel complex; P:sensory perception of pain; P:cardiac muscle contraction	no GO terms
TRINITY_GG_8231_c0_g1_i1	Lko057S000656	1	LOD2	potassium channel [Drosophila melanogaster]	227	gi|55669120|gb|AAN63887.3|potassium channel [Drosophila melanogaster]	AAN63887	2.29e-38	89.1892	134.42	74	66	P:GO:0045838; P:GO:1903351; P:GO:0045938; P:GO:0055085; P:GO:0060025; P:GO:0009584; C:GO:0008076; P:GO:0008345; P:GO:0060048; P:GO:0006813; F:GO:0005249; P:GO:0002027; P:GO:0007637; P:GO:0001700; P:GO:0048675; P:GO:0007629; P:GO:0048047; P:GO:0019233; P:GO:0001508; P:GO:0030431	P:positive regulation of membrane potential; P:cellular response to dopamine; P:positive regulation of circadian sleep/wake cycle, sleep; P:transmembrane transport; P:regulation of synaptic activity; P:detection of visible light; C:voltage-gated potassium channel complex; P:larval locomotory behavior; P:cardiac muscle contraction; P:potassium ion transport; F:voltage-gated potassium channel activ…	no IPS match
TRINITY_GG_8232_c0_g1_i1	Lko057S000656	1	LOD2	uncharacterized protein Dmel_CG17454	1847	gi|221513728|ref|NP_001138001.1|uncharacterized protein Dmel_CG17454, isoform A [Drosophila melanogaster] gi|16769358|gb|AAL28898.1| LD28068p [Drosophila melanogaster] gi|220902705|gb|ACL83356.1| uncharacterized protein Dmel_CG17454, isoform A [Drosophila melanogaster]	NP_001138001, AAL28898, ACL83356	1.5e-48	65.5039	170.629	258	169	P:GO:0000381; C:GO:0071011; P:GO:0000398	P:regulation of alternative mRNA splicing, via spliceosome; C:precatalytic spliceosome; P:mRNA splicing, via spliceosome	C:GO:0005634; F:GO:0003723; C:GO:0005737; P:GO:0006397
TRINITY_GG_8229_c0_g1_i1	Lko057S000656	1	LOD2	uncharacterized protein Dmel_CG17765 [Drosophila melanogaster]	1476	gi|19921976|ref|NP_610592.1|uncharacterized protein Dmel_CG17765 [Drosophila melanogaster] gi|7303734|gb|AAF58783.1| uncharacterized protein Dmel_CG17765 [Drosophila melanogaster] gi|16768266|gb|AAL28352.1| GH27120p [Drosophila melanogaster]	NP_610592, AAF58783, AAL28352	5.58e-79	81.4371	245.743	167	136	P:GO:0040011; P:GO:0008340; P:GO:0007520; P:GO:0008345; C:GO:0043025; C:GO:0043234; F:GO:0004198; P:GO:0006996; P:GO:0042335; P:GO:0007600; P:GO:0051049; C:GO:0005737; P:GO:0006928; F:GO:0005509; P:GO:0046330; C:GO:0016020; C:GO:0005819; C:GO:0015629; F:GO:0017022; P:GO:0006909; P:GO:0016540; P:GO:0016322; P:GO:0021919; P:GO:0050832	P:locomotion; P:determination of adult lifespan; P:myoblast fusion; P:larval locomotory behavior; C:neuronal cell body; C:protein complex; F:calcium-dependent cysteine-type endopeptidase activity; P:organelle organization; P:cuticle development; P:sensory perception; P:regulation of transport; C:cytoplasm; P:movement of cell or subcellular component; F:calcium ion binding; P:positive regulation o…	F:GO:0005509
TRINITY_GG_1013_c9_g1_i1	Lko057S000917	1	LOD2	AChain A, X-ray Structure Of Dopamine Transporter Elucidates Antidepressant Mechanism	448	gi|544192163|pdb|4M48|AChain A, X-ray Structure Of Dopamine Transporter Elucidates Antidepressant Mechanism	4M48	2.14e-83	92.029	255.373	138	127	F:GO:0015222; F:GO:0015375; F:GO:0005261; P:GO:0042066; F:GO:0005034; C:GO:0043679; P:GO:0009414; P:GO:0047484; P:GO:0051610; F:GO:0005328; P:GO:0050891; C:GO:0016021; P:GO:0006909; P:GO:0015816; C:GO:0016323; P:GO:0019226; C:GO:0030424	F:serotonin transmembrane transporter activity; F:glycine:sodium symporter activity; F:cation channel activity; P:perineurial glial growth; F:osmosensor activity; C:axon terminus; P:response to water deprivation; P:regulation of response to osmotic stress; P:serotonin uptake; F:neurotransmitter:sodium symporter activity; P:multicellular organismal water homeostasis; C:integral component of membra…	P:GO:0006836; F:GO:0005328; C:GO:0016021
TRINITY_GG_1013_c11_g1_i1	Lko057S000917	1	LOD2	AChain A, X-ray Structure Of Drosophila Dopamine Transporter With Subsiteb Mutations (d121g/s426m) Bound To 3,4dichlorophenethylamine	335	gi|817599064|pdb|4XPH|AChain A, X-ray Structure Of Drosophila Dopamine Transporter With Subsiteb Mutations (d121g/s426m) Bound To 3,4dichlorophenethylamine	4XPH	7.06e-62	94.5946	197.593	111	105	F:GO:0015222; F:GO:0015375; F:GO:0005261; P:GO:0051939; F:GO:0005332; C:GO:0005886; C:GO:0043679; C:GO:0097386; P:GO:0051610; P:GO:0071260; F:GO:0005328; C:GO:0016021; P:GO:0006909; P:GO:0015816; C:GO:0030424	F:serotonin transmembrane transporter activity; F:glycine:sodium symporter activity; F:cation channel activity; P:gamma-aminobutyric acid import; F:gamma-aminobutyric acid:sodium symporter activity; C:plasma membrane; C:axon terminus; C:glial cell projection; P:serotonin uptake; P:cellular response to mechanical stimulus; F:neurotransmitter:sodium symporter activity; C:integral component of membr…	P:GO:0006836; F:GO:0005328; C:GO:0016021
TRINITY_GG_1013_c1_g1_i1	Lko057S000917	1	LOD2	CG5044	1776	gi|28571729|ref|NP_650453.3|CG5044, isoform A [Drosophila melanogaster] gi|15292329|gb|AAK93433.1| LD47223p [Drosophila melanogaster] gi|28381308|gb|AAF55181.2| CG5044, isoform A [Drosophila melanogaster]	NP_650453, AAK93433, AAF55181	5.86e-117	72.3343	353.599	347	251	F:GO:0003824; C:GO:0005739; P:GO:1903035; C:GO:0043232; C:GO:0044446	F:catalytic activity; C:mitochondrion; P:negative regulation of response to wounding; C:intracellular non-membrane-bounded organelle; C:intracellular organelle part	no GO terms
TRINITY_GG_1012_c0_g1_i1	Lko057S000917	1	LOD2	CG9346 [Drosophila melanogaster]	3829	gi|19922658|ref|NP_611535.1|CG9346 [Drosophila melanogaster] gi|7291222|gb|AAF46654.1| CG9346 [Drosophila melanogaster]	NP_611535, AAF46654	0	70.3218	703.36	839	590	F:GO:0003729; C:GO:0005654	F:mRNA binding; C:nucleoplasm	F:GO:0003676; F:GO:0003723; P:GO:0006396
TRINITY_GG_1013_c7_g1_i1	Lko057S000917	1	LOD2	dopamine transporter	606	gi|24654186|ref|NP_523763.2|dopamine transporter, isoform A [Drosophila melanogaster] gi|122129664|sp|Q7K4Y6.1|DAT_DROME RecName: Full=Sodium-dependent dopamine transporter; AltName: Full=Protein fumin gi|16930790|gb|AAL32055.1|AF439752_1 dopamine transporter [Drosophila melanogaster] gi|15291469|gb|AAK93003.1| GH22929p [Drosophila melanogaster] gi|21627101|gb|AAF57986.2| dopamine transporter, is…	NP_523763, Q7K4Y6, AAL32055, AAK93003, AAF57986	2.29e-112	88.5572	334.724	201	178	F:GO:0015222; F:GO:0015296; F:GO:0005261; F:GO:0005283; P:GO:0042066; F:GO:0005034; P:GO:0006865; C:GO:0043679; P:GO:0009414; C:GO:0097386; P:GO:0047484; P:GO:0051610; P:GO:0071260; P:GO:0050891; P:GO:0006909; C:GO:0016323; P:GO:0019226; C:GO:0030424	F:serotonin transmembrane transporter activity; F:anion:cation symporter activity; F:cation channel activity; F:sodium:amino acid symporter activity; P:perineurial glial growth; F:osmosensor activity; P:amino acid transport; C:axon terminus; P:response to water deprivation; C:glial cell projection; P:regulation of response to osmotic stress; P:serotonin uptake; P:cellular response to mechanical s…	P:GO:0006836; F:GO:0005328; C:GO:0016021
TRINITY_GG_1011_c0_g1_i1	Lko057S000917	1	LOD2	four wheel drive	6162	gi|17933718|ref|NP_524822.1|four wheel drive, isoform A [Drosophila melanogaster] gi|24654708|ref|NP_728518.1| four wheel drive, isoform B [Drosophila melanogaster] gi|442629176|ref|NP_001261203.1| four wheel drive, isoform D [Drosophila melanogaster] gi|15292409|gb|AAK93473.1| LP07057p [Drosophila melanogaster] gi|23092693|gb|AAF47375.2| four wheel drive, isoform A [Drosophila melanogaster] gi|2…	NP_524822, NP_728518, NP_001261203, AAK93473, AAF47375, AAN11437, AGB93898	0	71.1324	683.715	627	446	P:GO:0007293; P:GO:0045927; P:GO:0000916; P:GO:0007110; P:GO:0007030; P:GO:0008340; P:GO:0008582; P:GO:0060284; P:GO:0090175; P:GO:0007015; P:GO:0046854; C:GO:0005794; P:GO:0007111; P:GO:0002164; P:GO:0007112; P:GO:0007552; P:GO:0051094; P:GO:0002165; P:GO:0000212; P:GO:0007009; C:GO:0005768; P:GO:0048522; P:GO:0030726; P:GO:0051240; P:GO:0033554; P:GO:0071711; C:GO:0035032; P:GO:0009886; F:GO:00…	P:germarium-derived egg chamber formation; P:positive regulation of growth; P:actomyosin contractile ring contraction; P:meiosis I cytokinesis; P:Golgi organization; P:determination of adult lifespan; P:regulation of synaptic growth at neuromuscular junction; P:regulation of cell development; P:regulation of establishment of planar polarity; P:actin filament organization; P:phosphatidylinositol p…	F:GO:0016301
TRINITY_GG_1011_c1_g1_i1	Lko057S000917	1	LOD2	LD30525p [Drosophila melanogaster]	4506	gi|15291885|gb|AAK93211.1|LD30525p [Drosophila melanogaster]	AAK93211	0	87.1612	1020.38	701	611	F:GO:0004252; F:GO:0050291; P:GO:0006641; P:GO:0045732; P:GO:0046513; C:GO:0005783; F:GO:0004176; P:GO:0008299; P:GO:0007005; P:GO:0046889; C:GO:0005777; F:GO:0003677; F:GO:0005524; C:GO:0005637; P:GO:0032933; P:GO:0006515; C:GO:0005759; C:GO:0016021; P:GO:0050995	F:serine-type endopeptidase activity; F:sphingosine N-acyltransferase activity; P:triglyceride metabolic process; P:positive regulation of protein catabolic process; P:ceramide biosynthetic process; C:endoplasmic reticulum; F:ATP-dependent peptidase activity; P:isoprenoid biosynthetic process; P:mitochondrion organization; P:positive regulation of lipid biosynthetic process; C:peroxisome; F:DNA b…	F:GO:0005524; P:GO:0006515; P:GO:0006508; F:GO:0004252; F:GO:0004176
TRINITY_GG_1011_c2_g1_i1	Lko057S000917	1	LOD2	Nonsense-mediated mRNA 3 [Drosophila melanogaster]	1810	gi|17137506|ref|NP_477332.1|Nonsense-mediated mRNA 3 [Drosophila melanogaster] gi|2894111|emb|CAA15695.1| EG:152A3.1 [Drosophila melanogaster] gi|7290283|gb|AAF45744.1| Nonsense-mediated mRNA 3 [Drosophila melanogaster] gi|16197917|gb|AAL13723.1| GM14705p [Drosophila melanogaster]	NP_477332, CAA15695, AAF45744, AAL13723	0	79.8715	642.884	467	373	P:GO:0022008; P:GO:0009267	P:neurogenesis; P:cellular response to starvation	no GO terms
TRINITY_GG_1013_c2_g1_i1;TRINITY_GG_7939_c3_g1_i1	Lko057S000917	1	LOD2	putative ORF2 [Drosophila melanogaster]	224	gi|51950578|gb|AAA70222.2|putative ORF2 [Drosophila melanogaster]	AAA70222	2.87e-08	55.4054	49.2914	74	41			noGOterms
TRINITY_GG_1010_c1_g1_i1	Lko057S000917	1	LOD2	RT10145p	5418	gi|308193435|gb|ADO16259.1|RT10145p, partial [Drosophila melanogaster]	ADO16259	2.89e-18	50.2762	89.3521	181	91	P:GO:0006935; P:GO:0050794; P:GO:0001667; P:GO:0048812; P:GO:0048513; P:GO:0048667; F:GO:0005102; P:GO:0009888	P:chemotaxis; P:regulation of cellular process; P:ameboidal-type cell migration; P:neuron projection morphogenesis; P:animal organ development; P:cell morphogenesis involved in neuron differentiation; F:receptor binding; P:tissue development	F:GO:0005515
TRINITY_GG_1011_c4_g1_i1	Lko057S000917	1	LOD2	RTXE_DROMERecName: Full=Probable RNA-directed DNA polymerase from transposon X-element; AltName: Full=Reverse transcriptase	500	gi|74825508|sp|Q9NBX4.1|RTXE_DROMERecName: Full=Probable RNA-directed DNA polymerase from transposon X-element; AltName: Full=Reverse transcriptase gi|8925303|gb|AAF81411.1|AF237761_2 unknown [Drosophila melanogaster]	Q9NBX4, AAF81411	2.62e-28	55.7576	110.538	165	92			no GO terms
TRINITY_GG_1013_c1_g1_i2	Lko057S000917	1	LOD2	Secretion-associated Ras-related 1	7463	gi|24648946|ref|NP_732717.1|Secretion-associated Ras-related 1, isoform A [Drosophila melanogaster] gi|24648948|ref|NP_732718.1| Secretion-associated Ras-related 1, isoform C [Drosophila melanogaster] gi|24648950|ref|NP_732719.1| Secretion-associated Ras-related 1, isoform D [Drosophila melanogaster] gi|45553457|ref|NP_996265.1| Secretion-associated Ras-related 1, isoform E [Drosophila melanogast…	NP_732717, NP_732718, NP_732719, NP_996265, AAF55974, AAN14369, AAN14370, AAN71500, AAS65194	1.06e-115	94.8187	365.54	193	183	P:GO:0008360; P:GO:1903047; C:GO:0032154; P:GO:0032011; P:GO:1902036; P:GO:0045807; P:GO:0007155; P:GO:0007112; C:GO:0005795; F:GO:0005525; C:GO:0005769; F:GO:0003924; P:GO:0072661; P:GO:0016197; P:GO:0048081; P:GO:0070863; C:GO:0005829; C:GO:0030127; P:GO:0050775; P:GO:0006471; P:GO:0035293; P:GO:0034067; P:GO:0000902; P:GO:0007283; P:GO:0007163; P:GO:1903035; P:GO:0007520; P:GO:0000226; P:GO:00…	P:regulation of cell shape; P:mitotic cell cycle process; C:cleavage furrow; P:ARF protein signal transduction; P:regulation of hematopoietic stem cell differentiation; P:positive regulation of endocytosis; P:cell adhesion; P:male meiosis cytokinesis; C:Golgi stack; F:GTP binding; C:early endosome; F:GTPase activity; P:protein targeting to plasma membrane; P:endosomal transport; P:positive regula…
TRINITY_GG_1009_c1_g1_i1	Lko057S000917	1	LOD2	tetraspanin 42Ea	1056	gi|24586138|ref|NP_525012.2|tetraspanin 42Ea, isoform A [Drosophila melanogaster] gi|24586140|ref|NP_652646.1| tetraspanin 42Ea, isoform B [Drosophila melanogaster] gi|24586142|ref|NP_724524.1| tetraspanin 42Ea, isoform C [Drosophila melanogaster] gi|9624365|gb|AAF90140.1|AF274014_1 tetraspanin 42Ea [Drosophila melanogaster] gi|17861434|gb|AAL39194.1| GH05668p [Drosophila melanogaster] gi|2164515…	NP_525012, NP_652646, NP_724524, AAF90140, AAL39194, AAG22311, AAG22210, AAF57420	1.63e-06	57.4468	49.2914	47	27	P:GO:0008150; C:GO:0016021; F:GO:0003674	P:biological_process; C:integral component of membrane; F:molecular_function	C:GO:0016021
TRINITY_GG_1010_c2_g1_i1	Lko057S000917	1	LOD2	tetraspanin 47F [Drosophila melanogaster]	1470	gi|24652731|ref|NP_725044.1|tetraspanin 47F [Drosophila melanogaster] gi|21627484|gb|AAM68735.1| tetraspanin 47F [Drosophila melanogaster]	NP_725044, AAM68735	3.45e-07	46.5409	52.373	159	74	P:GO:0008150; C:GO:0016021; F:GO:0003674	P:biological_process; C:integral component of membrane; F:molecular_function	C:GO:0016021
TRINITY_GG_1013_c0_g1_i1	Lko057S000917	1	LOD2	uncharacterized protein Dmel_CG13585	2169	gi|20130361|ref|NP_611928.1|uncharacterized protein Dmel_CG13585, isoform A [Drosophila melanogaster] gi|24762664|ref|NP_726458.1| uncharacterized protein Dmel_CG13585, isoform B [Drosophila melanogaster] gi|281364207|ref|NP_001163291.1| uncharacterized protein Dmel_CG13585, isoform C [Drosophila melanogaster] gi|281364209|ref|NP_001163292.1| uncharacterized protein Dmel_CG13585, isoform D [Droso…	NP_611928, NP_726458, NP_001163291, NP_001163292, AAF47223, AAM68318, ACT80126, ACZ94563, ACZ94564, ADB91435	1.23e-15	61.7021	74.3294	94	58			no GO terms
TRINITY_GG_1008_c0_g1_i1	Lko057S000917	1	LOD2	uncharacterized protein Dmel_CG16974	1569	gi|24584026|ref|NP_609610.2|uncharacterized protein Dmel_CG16974, isoform A [Drosophila melanogaster] gi|386769580|ref|NP_001246018.1| uncharacterized protein Dmel_CG16974, isoform B [Drosophila melanogaster] gi|7298013|gb|AAF53254.1| uncharacterized protein Dmel_CG16974, isoform A [Drosophila melanogaster] gi|66771723|gb|AAY55173.1| LD10349p [Drosophila melanogaster] gi|383291477|gb|AFH03692.1| …	NP_609610, NP_001246018, AAF53254, AAY55173, AFH03692	7.09e-15	52.518	78.9518	139	73	P:GO:0060562; P:GO:0007165; P:GO:0040011; P:GO:0009886; P:GO:0048812; C:GO:0044464; F:GO:0004672; F:GO:0005488; P:GO:0002165; P:GO:0009887; F:GO:0004930; P:GO:0009605; P:GO:0051179; P:GO:0006928; C:GO:0016020	P:epithelial tube morphogenesis; P:signal transduction; P:locomotion; P:post-embryonic animal morphogenesis; P:neuron projection morphogenesis; C:cell part; F:protein kinase activity; F:binding; P:instar larval or pupal development; P:animal organ morphogenesis; F:G-protein coupled receptor activity; P:response to external stimulus; P:localization; P:movement of cell or subcellular component; C:m…	F:GO:0005515
TRINITY_GG_1009_c0_g1_i1	Lko057S000917	1	LOD2	uncharacterized protein Dmel_CG31803 [Drosophila melanogaster]	1177	gi|24584814|ref|NP_724049.1|uncharacterized protein Dmel_CG31803 [Drosophila melanogaster] gi|19528203|gb|AAL90216.1| AT29119p [Drosophila melanogaster] gi|22946712|gb|AAN10988.1| uncharacterized protein Dmel_CG31803 [Drosophila melanogaster]	NP_724049, AAL90216, AAN10988	2.85e-55	52.4823	184.496	282	148	P:GO:0008150; C:GO:0005575; F:GO:0003674	P:biological_process; C:cellular_component; F:molecular_function	no IPS match
TRINITY_GG_1015_c0_g2_i1	Lko057S000917	1	LOD2	uncharacterized protein Dmel_CG32344 [Drosophila melanogaster]	2476	gi|28575014|ref|NP_612028.4|uncharacterized protein Dmel_CG32344 [Drosophila melanogaster] gi|18447311|gb|AAL68229.1| LD28101p [Drosophila melanogaster] gi|23092697|gb|AAN11439.1| uncharacterized protein Dmel_CG32344 [Drosophila melanogaster]	NP_612028, AAL68229, AAN11439	0	64.0646	626.706	743	476	C:GO:0036464; P:GO:0045727; P:GO:0008593; P:GO:0048646; P:GO:0022008; P:GO:0007315; P:GO:0006403; C:GO:0005875; F:GO:0003723; F:GO:0003724; P:GO:0000381; P:GO:0051276; C:GO:0045495	C:cytoplasmic ribonucleoprotein granule; P:positive regulation of translation; P:regulation of Notch signaling pathway; P:anatomical structure formation involved in morphogenesis; P:neurogenesis; P:pole plasm assembly; P:RNA localization; C:microtubule associated complex; F:RNA binding; F:RNA helicase activity; P:regulation of alternative mRNA splicing, via spliceosome; P:chromosome organization;…	F:GO:0003676; F:GO:0005524; C:GO:0005634; F:GO:0003723; F:GO:0004004
TRINITY_GG_1010_c0_g1_i1;TRINITY_GG_1010_c0_g1_i2	Lko057S000917	1	LOD2	uncharacterized protein Dmel_CG33695	827	gi|78706890|ref|NP_001027250.1|uncharacterized protein Dmel_CG33695, isoform C [Drosophila melanogaster] gi|22946246|gb|AAN10777.1| uncharacterized protein Dmel_CG33695, isoform C [Drosophila melanogaster] gi|60677923|gb|AAX33468.1| RE10350p [Drosophila melanogaster]	NP_001027250, AAN10777, AAX33468	8.96e-13	76.3636	67.781	55	42	F:GO:0003677	F:DNAbinding	noGOterms
TRINITY_GG_2095_c0_g1_i1	Lko057S001148	1	LOD2	SD03956p [Drosophila melanogaster]	1854	gi|19527661|gb|AAL89945.1|SD03956p [Drosophila melanogaster]	AAL89945	4.12e-20	49.5238	96.2857	210	104	C:GO:0098793; P:GO:0050794; P:GO:0016043; P:GO:0044763; P:GO:0050877; C:GO:0005886	C:presynapse; P:regulation of cellular process; P:cellular component organization; P:single-organism cellular process; P:neurological system process; C:plasma membrane	F:GO:0005515
TRINITY_GG_2260_c0_g1_i1	Lko057S001177	1	LOD2	LPSBP_PERAM Hemolymph lipopolysaccharide-binding protein OS=Periplaneta americana PE=1 SV=1	1560	gnl|BL_ORD_ID|12575sp|P26305|LPSBP_PERAM Hemolymph lipopolysaccharide-binding protein OS=Periplaneta americana PE=1 SV=1	12575	1.25e-11	49.635	64.6994	137	68			no GO terms
TRINITY_GG_2660_c0_g1_i1;TRINITY_GG_2660_c1_g1_i1;TRINITY_GG_2660_c2_g1_i1	Lko057S001260	1	LOD2	anaplastic lymphoma kinase	269	gi|21358251|ref|NP_652600.1|anaplastic lymphoma kinase, isoform A [Drosophila melanogaster] gi|442623938|ref|NP_001261027.1| anaplastic lymphoma kinase, isoform B [Drosophila melanogaster] gi|7110575|gb|AAF36990.1|AF236106_1 receptor protein tyrosine kinase ALK splice variant A [Drosophila melanogaster] gi|7302901|gb|AAF57973.1| anaplastic lymphoma kinase, isoform A [Drosophila melanogaster] gi|4…	NP_652600, NP_001261027, AAF36990, AAF57973, AGB93559	1.35e-07	52.7778	48.1358	72	38	F:GO:0004713;C:GO:0061174;P:GO:0016043;P:GO:0009653;P:GO:0048513;P:GO:0043410;P:GO:0048666;P:GO:0051239;F:GO:0004871;P:GO:0050896;P:GO:0048731;P:GO:0044763	F:proteintyrosinekinaseactivity;C:typeIterminalbouton;P:cellularcomponentorganization;P:anatomicalstructuremorphogenesis;P:animalorgandevelopment;P:positiveregulationofMAPKcascade;P:neurondevelopment;P:regulationofmulticellularorganismalprocess;F:signaltransduceractivity;P:responsetostimulus;P:systemdevelopment;P:single-organismcellularprocess	F:GO:0005515;C:GO:0016020;noIPSmatch
TRINITY_GG_2662_c0_g1_i1	Lko057S001260	1	LOD2	C1A9 antigen [Drosophila melanogaster]	1128	gi|157026|gb|AAA28402.1|C1A9 antigen [Drosophila melanogaster]	AAA28402	2.2e-13	74.5098	68.1662	51	38	F:GO:0035064; P:GO:1900111; P:GO:0006343; P:GO:0022008; P:GO:0045944; F:GO:0003696; P:GO:0045448; C:GO:0005701; P:GO:0000122; C:GO:0000780; C:GO:0005703; P:GO:0030702; C:GO:0005705; C:GO:0005704; F:GO:0000182; F:GO:0003729; P:GO:0033697; P:GO:0031452; C:GO:0035012; P:GO:0000723; P:GO:0035092; P:GO:0042981; C:GO:0043234; F:GO:0003682; P:GO:0044026; C:GO:0005721; C:GO:0005720; P:GO:0031507; C:GO:00…	F:methylated histone binding; P:positive regulation of histone H3-K9 dimethylation; P:establishment of chromatin silencing; P:neurogenesis; P:positive regulation of transcription from RNA polymerase II promoter; F:satellite DNA binding; P:mitotic cell cycle, embryonic; C:polytene chromosome chromocenter; P:negative regulation of transcription from RNA polymerase II promoter; C:condensed nuclear c…	no GO terms
TRINITY_GG_2667_c0_g1_i1	Lko057S001260	1	LOD2	CG11785 [Drosophila melanogaster]	1370	gi|116806716|emb|CAL26784.1|CG11785 [Drosophila melanogaster]	CAL26784	2.87e-100	81.5534	299.286	206	168	P:GO:0048042; C:GO:0016021; P:GO:0007311; C:GO:0012505; P:GO:0048518; F:GO:0005215; P:GO:0048193	P:regulation of post-mating oviposition; C:integral component of membrane; P:maternal specification of dorsal/ventral axis, oocyte, germ-line encoded; C:endomembrane system; P:positive regulation of biological process; F:transporter activity; P:Golgi vesicle transport	C:GO:0016021; P:GO:0006810
TRINITY_GG_2667_c1_g1_i1	Lko057S001260	1	LOD2	CG3295 [Drosophila melanogaster]	3150	gi|20130193|ref|NP_611536.1|CG3295 [Drosophila melanogaster] gi|7291223|gb|AAF46655.1| CG3295 [Drosophila melanogaster] gi|21428860|gb|AAM50149.1| GH10162p [Drosophila melanogaster]	NP_611536, AAF46655, AAM50149	3.65e-127	63.3803	394.815	426	270	P:GO:0008150; C:GO:0005575; F:GO:0003674	P:biological_process; C:cellular_component; F:molecular_function	F:GO:0005515
TRINITY_GG_2664_c0_g1_i1	Lko057S001260	1	LOD2	CG6084	1329	gi|442631724|ref|NP_001261717.1|CG6084, isoform D [Drosophila melanogaster] gi|440215640|gb|AGB94411.1| CG6084, isoform D [Drosophila melanogaster]	NP_001261717, AGB94411	2.58e-130	80.1262	379.793	317	254	P:GO:0035220; P:GO:0016319; F:GO:0016491; C:GO:0005829; P:GO:0055114; P:GO:0022416; C:GO:0005654	P:wing disc development; P:mushroom body development; F:oxidoreductase activity; C:cytosol; P:oxidation-reduction process; P:chaeta development; C:nucleoplasm	F:GO:0016491; P:GO:0055114
TRINITY_GG_2663_c0_g1_i1	Lko057S001260	1	LOD2	CG6712 [Drosophila melanogaster]	1623	gi|17137746|ref|NP_477479.1|CG6712 [Drosophila melanogaster] gi|71153717|sp|Q9VKB4.1|RPF1_DROME RecName: Full=Probable ribosome production factor 1; AltName: Full=Ribosome biogenesis protein RPF1 gi|7297917|gb|AAF53162.1| CG6712 [Drosophila melanogaster] gi|15291677|gb|AAK93107.1| LD23405p [Drosophila melanogaster]	NP_477479, Q9VKB4, AAF53162, AAK93107	1.86e-111	77.6062	337.806	259	201	F:GO:0003723; P:GO:0042254; P:GO:0009267; C:GO:0005730; C:GO:0005654	F:RNA binding; P:ribosome biogenesis; P:cellular response to starvation; C:nucleolus; C:nucleoplasm	no GO terms
TRINITY_GG_2659_c1_g1_i1	Lko057S001260	1	LOD2	glass bottom boat	2783	gi|17137520|ref|NP_477340.1|glass bottom boat, isoform A [Drosophila melanogaster] gi|665403195|ref|NP_001286786.1| glass bottom boat, isoform B [Drosophila melanogaster] gi|112828|sp|P27091.1|60A_DROME RecName: Full=Protein 60A; AltName: Full=Protein glass bottom boat; Flags: Precursor gi|156728|gb|AAA28306.1| 'precursor TGF-B-like protein from 60A gene'; Potential glycosylation sites are locate…	NP_477340, NP_001286786, P27091, AAA28306, AAA28307, AAF47075, AHN56581	1.08e-51	87.7358	189.504	106	93	P:GO:0035168; P:GO:0007450; P:GO:0008340; P:GO:0036099; P:GO:0007179; P:GO:0048636; P:GO:0007378; P:GO:0007411; P:GO:0007455; P:GO:0008586; P:GO:0007458; P:GO:0060323; P:GO:0045887; P:GO:0007528; P:GO:0032924; P:GO:0045570; P:GO:0050796; F:GO:0046982; P:GO:0099504; P:GO:0032927; P:GO:0035158; F:GO:0016015; P:GO:0061320; P:GO:0035156; F:GO:0005160; C:GO:0035230; P:GO:0008354; P:GO:0007425; P:GO:00…	P:larval lymph gland hemocyte differentiation; P:dorsal/ventral pattern formation, imaginal disc; P:determination of adult lifespan; P:female germ-line stem cell population maintenance; P:transforming growth factor beta receptor signaling pathway; P:positive regulation of muscle organ development; P:amnioserosa formation; P:axon guidance; P:eye-antennal disc morphogenesis; P:imaginal disc-derived…	F:GO:0008083
TRINITY_GG_2667_c2_g1_i1;TRINITY_GG_2667_c2_g1_i2	Lko057S001260	1	LOD2	gliotactin [Drosophila melanogaster]	3861	gi|899062|gb|AAC41579.1|gliotactin [Drosophila melanogaster]	AAC41579	0	73.599	930.628	803	591	P:GO:0061343;P:GO:0035321;P:GO:0035151;P:GO:0050808;P:GO:0008065;P:GO:0048515;P:GO:0007268;P:GO:0007298;P:GO:0009950;F:GO:0008233;C:GO:0005886;C:GO:0061689;P:GO:0007610;P:GO:0008039;P:GO:0009628;P:GO:0009605;P:GO:0019991;P:GO:0006508;C:GO:0005918;P:GO:0019233;P:GO:0016321;F:GO:0052689	P:celladhesioninvolvedinheartmorphogenesis;P:maintenanceofimaginaldisc-derivedwinghairorientation;P:regulationoftubesize,opentrachealsystem;P:synapseorganization;P:establishmentofblood-nervebarrier;P:spermatiddifferentiation;P:chemicalsynaptictransmission;P:borderfolliclecellmigration;P:dorsal/ventralaxisspecification;F:peptidaseactivity;C:plasmamembrane;C:tricellulartightjunction;P:behavior;P:sy…	noGOterms
TRINITY_GG_2658_c0_g1_i1	Lko057S001260	1	LOD2	huntingtin interacting protein 1	5606	gi|28574920|ref|NP_648597.2|huntingtin interacting protein 1, isoform A [Drosophila melanogaster] gi|21744251|gb|AAM76184.1| LD16566p [Drosophila melanogaster] gi|28380535|gb|AAF49885.2| huntingtin interacting protein 1, isoform A [Drosophila melanogaster] gi|194136561|gb|ACF33510.1| huntingtin interacting protein 1 [Drosophila melanogaster]	NP_648597, AAM76184, AAF49885, ACF33510	1.72e-84	67.7778	303.908	270	183	P:GO:0008360; P:GO:0007390; P:GO:0045214; F:GO:0005178; P:GO:0007298; P:GO:0007430; P:GO:0060439; P:GO:0007475; P:GO:0035160; P:GO:0007526; P:GO:0033627; C:GO:0005925; F:GO:0003779; P:GO:0045892; P:GO:0006909; P:GO:0086042; P:GO:0016203	P:regulation of cell shape; P:germ-band shortening; P:sarcomere organization; F:integrin binding; P:border follicle cell migration; P:terminal branching, open tracheal system; P:trachea morphogenesis; P:apposition of dorsal and ventral imaginal disc-derived wing surfaces; P:maintenance of epithelial integrity, open tracheal system; P:larval somatic muscle development; P:cell adhesion mediated by …	F:GO:0003779; F:GO:0005543
TRINITY_GG_2662_c7_g1_i1	Lko057S001260	1	LOD2	LP03070p [Drosophila melanogaster]	281	gi|20152059|gb|AAM11389.1|LP03070p [Drosophila melanogaster]	AAM11389	0.000431	62.963	38.5058	54	34	C:GO:0061177; P:GO:1900074; C:GO:0061176; P:GO:0007498; P:GO:0045610; P:GO:0007411; P:GO:0007169; P:GO:0043410; P:GO:0006468; P:GO:0040008; P:GO:0007522; F:GO:0005524; F:GO:0004713; P:GO:0000186; P:GO:0042051; F:GO:0004714; C:GO:0071212; P:GO:0048565; F:GO:0004716; P:GO:0045792; C:GO:0016020; P:GO:0070374; P:GO:0090328	C:type Is terminal bouton; P:negative regulation of neuromuscular synaptic transmission; C:type Ib terminal bouton; P:mesoderm development; P:regulation of hemocyte differentiation; P:axon guidance; P:transmembrane receptor protein tyrosine kinase signaling pathway; P:positive regulation of MAPK cascade; P:protein phosphorylation; P:regulation of growth; P:visceral muscle development; F:ATP bindi…	no GO terms
TRINITY_GG_2661_c0_g1_i1	Lko057S001260	1	LOD2	Multidrug-Resistance like protein 1	4766	gi|45550972|ref|NP_723772.2|Multidrug-Resistance like protein 1, isoform A [Drosophila melanogaster] gi|45552359|ref|NP_995702.1| Multidrug-Resistance like protein 1, isoform O [Drosophila melanogaster] gi|45445106|gb|AAF53223.4| Multidrug-Resistance like protein 1, isoform A [Drosophila melanogaster] gi|45445107|gb|AAS64689.1| Multidrug-Resistance like protein 1, isoform O [Drosophila melanogast…	NP_723772, NP_995702, AAF53223, AAS64689	0	53.1792	728.783	1384	736	F:GO:0043492; C:GO:0016020; P:GO:0050896	F:ATPase activity, coupled to movement of substances; C:membrane; P:response to stimulus	F:GO:0016887; F:GO:0005524; F:GO:0042626; P:GO:0055085; C:GO:0016021; P:GO:0006810
TRINITY_GG_2669_c0_g1_i1	Lko057S001260	1	LOD2	outer segment 5 [Drosophila melanogaster]	2704	gi|221510715|ref|NP_610064.2|outer segment 5 [Drosophila melanogaster] gi|220902085|gb|AAF53931.2| outer segment 5 [Drosophila melanogaster]	NP_610064, AAF53931	0	61.1559	553.132	744	455	P:GO:0065008; P:GO:0060271; P:GO:0007154; C:GO:0035097; C:GO:0043232; C:GO:0043234; P:GO:0048523; F:GO:0005488; P:GO:0006950; C:GO:0000123; P:GO:0007017; C:GO:0071013; P:GO:0010604; P:GO:0048731; C:GO:0097730; C:GO:0071011; P:GO:0016570; P:GO:0030154; P:GO:0051716; P:GO:0010467; P:GO:0032268; P:GO:0034641; P:GO:0031325; P:GO:0018205	P:regulation of biological quality; P:cilium assembly; P:cell communication; C:histone methyltransferase complex; C:intracellular non-membrane-bounded organelle; C:protein complex; P:negative regulation of cellular process; F:binding; P:response to stress; C:histone acetyltransferase complex; P:microtubule-based process; C:catalytic step 2 spliceosome; P:positive regulation of macromolecule metab…	F:GO:0005515
TRINITY_GG_2659_c0_g1_i1;TRINITY_GG_2659_c5_g1_i1;TRINITY_GG_2659_c7_g1_i1;TRINITY_GG_2659_c8_g1_i1	Lko057S001260	1	LOD2	patronin	602	gi|45552701|ref|NP_995875.1|patronin, isoform C [Drosophila melanogaster] gi|229891669|sp|A1ZAU8.1|PTRO_DROME RecName: Full=Patronin; AltName: Full=Short spindle protein 4 gi|45445498|gb|AAS64821.1| patronin, isoform C [Drosophila melanogaster]	NP_995875, A1ZAU8, AAS64821	2.05e-20	85.9649	89.3521	57	49	C:GO:0005813;F:GO:0005516;P:GO:0051013;F:GO:0030507;F:GO:0051011;P:GO:0031175;C:GO:0005819;P:GO:0007026;C:GO:0030496	C:centrosome;F:calmodulinbinding;P:microtubulesevering;F:spectrinbinding;F:microtubuleminus-endbinding;P:neuronprojectiondevelopment;C:spindle;P:negativeregulationofmicrotubuledepolymerization;C:midbody	F:GO:0005516;F:GO:0030507;P:GO:0031175;F:GO:0008017;noGOterms;F:GO:0005515;noIPSmatch
TRINITY_GG_2668_c0_g1_i1	Lko057S001260	1	LOD2	preli-like	869	gi|281362990|ref|NP_610487.3|preli-like, isoform B [Drosophila melanogaster] gi|442623002|ref|NP_001260824.1| preli-like, isoform C [Drosophila melanogaster] gi|62900712|sp|Q9V579.3|PREL_DROME RecName: Full=Protein preli-like gi|16769532|gb|AAL28985.1| LD36516p [Drosophila melanogaster] gi|25012730|gb|AAN71458.1| RE64040p [Drosophila melanogaster] gi|272432408|gb|AAF58939.3| preli-like, isoform B…	NP_610487, NP_001260824, Q9V579, AAL28985, AAN71458, AAF58939, AGB93357	1.83e-07	69.4444	51.9878	36	25	P:GO:0070584; C:GO:0030061; P:GO:0048813	P:mitochondrion morphogenesis; C:mitochondrial crista; P:dendrite morphogenesis	no IPS match
TRINITY_GG_2661_c3_g1_i1	Lko057S001260	1	LOD2	ribosomal protein L7	1250	gi|24583248|ref|NP_523531.1|ribosomal protein L7, isoform A [Drosophila melanogaster] gi|665407379|ref|NP_001285794.1| ribosomal protein L7, isoform B [Drosophila melanogaster] gi|13124809|sp|P32100.2|RL7_DROME RecName: Full=60S ribosomal protein L7 gi|485601367|pdb|3J39|F Chain F, Structure Of The D. Melanogaster 60s Ribosomal Proteins gi|7297615|gb|AAF52868.1| ribosomal protein L7, isoform A [D…	NP_523531, NP_001285794, P32100, 3J39, AAF52868, AAL90386, AHN54308	2.01e-103	75.9184	307.76	245	186	F:GO:0003735; P:GO:0035073; P:GO:0051298; P:GO:0002181; P:GO:0022008; C:GO:0022625	F:structural constituent of ribosome; P:pupariation; P:centrosome duplication; P:cytoplasmic translation; P:neurogenesis; C:cytosolic large ribosomal subunit	no GO terms
TRINITY_GG_2661_c1_g1_i1;TRINITY_GG_2661_c1_g1_i2;TRINITY_GG_2661_c1_g1_i3	Lko057S001260	1	LOD2	ribosomal protein S24 [Drosophila melanogaster]	1302	gi|20130247|ref|NP_611693.1|ribosomal protein S24 [Drosophila melanogaster] gi|485601322|pdb|3J38|Y Chain Y, Structure Of The D. Melanogaster 40s Ribosomal Proteins gi|7291445|gb|AAF46871.1| ribosomal protein S24 [Drosophila melanogaster] gi|21064575|gb|AAM29517.1| RE59324p [Drosophila melanogaster]	NP_611693, 3J38, AAF46871, AAM29517	9.31e-61	87.395	194.512	119	104	F:GO:0000166;F:GO:0003735;C:GO:0022627;P:GO:0002181	F:nucleotidebinding;F:structuralconstituentofribosome;C:cytosolicsmallribosomalsubunit;P:cytoplasmictranslation	F:GO:0003735;C:GO:0005840;C:GO:0005622;P:GO:0006412
TRINITY_GG_2656_c0_g1_i1	Lko057S001260	1	LOD2	RT01315p	343	gi|294862314|gb|ACN43735.2|RT01315p, partial [Drosophila melanogaster]	ACN43735	2.74e-53	83.1858	177.178	113	94	P:GO:0046331	P:lateral inhibition	no GO terms
TRINITY_GG_2668_c3_g1_i1	Lko057S001260	1	LOD2	serendipity alpha	1622	gi|17864102|ref|NP_524580.1|serendipity alpha, isoform A [Drosophila melanogaster] gi|939626264|ref|NP_001303490.1| serendipity alpha, isoform B [Drosophila melanogaster] gi|134898|sp|P07666.1|SRYA_DROME RecName: Full=Serendipity locus protein alpha gi|8656|emb|CAA26897.1| alpha protein [Drosophila melanogaster] gi|7301891|gb|AAF56999.1| serendipity alpha, isoform A [Drosophila melanogaster] gi|1…	NP_524580, NP_001303490, P07666, CAA26897, AAF56999, AAL48996, ALI30651	1.32e-18	46.1059	89.7373	321	148	C:GO:0044424; P:GO:0044699	C:intracellular part; P:single-organism process	F:GO:0051015; C:GO:0005737; C:GO:0016020; P:GO:0007155; P:GO:0007349
TRINITY_GG_2661_c2_g1_i1	Lko057S001260	1	LOD2	sirtuin 1 [Drosophila melanogaster]	6648	gi|17137536|ref|NP_477351.1|sirtuin 1 [Drosophila melanogaster] gi|74869522|sp|Q9VK34.1|SIR2_DROME RecName: Full=NAD-dependent histone deacetylase Sir2; AltName: Full=Regulatory protein Sir2; AltName: Full=Silent information regulator 2 gi|7298007|gb|AAF53248.1| sirtuin 1 [Drosophila melanogaster] gi|375065950|gb|AFA28456.1| FI19438p1 [Drosophila melanogaster] gi|378786698|gb|AFC38905.1| FI18008p…	NP_477351, Q9VK34, AAF53248, AFA28456, AFC38905	1.93e-143	75.2747	469.929	364	274	P:GO:0008340; P:GO:0035065; F:GO:0043167; P:GO:0042981; F:GO:0008134; P:GO:0006342; P:GO:0048149; C:GO:0005654; P:GO:0048813; P:GO:1901416; C:GO:0005737; P:GO:2000253; F:GO:0017136; P:GO:0016575	P:determination of adult lifespan; P:regulation of histone acetylation; F:ion binding; P:regulation of apoptotic process; F:transcription factor binding; P:chromatin silencing; P:behavioral response to ethanol; C:nucleoplasm; P:dendrite morphogenesis; P:regulation of response to ethanol; C:cytoplasm; P:positive regulation of feeding behavior; F:NAD-dependent histone deacetylase activity; P:histon…	F:GO:0070403
TRINITY_GG_2664_c1_g1_i1	Lko057S001260	1	LOD2	uncharacterized protein Dmel_CG10638	1163	gi|24663317|ref|NP_729808.1|uncharacterized protein Dmel_CG10638, isoform A [Drosophila melanogaster] gi|665410309|ref|NP_001287050.1| uncharacterized protein Dmel_CG10638, isoform D [Drosophila melanogaster] gi|7294572|gb|AAF49912.1| uncharacterized protein Dmel_CG10638, isoform A [Drosophila melanogaster] gi|599131257|gb|AHN58075.1| uncharacterized protein Dmel_CG10638, isoform D [Drosophila me…	NP_729808, NP_001287050, AAF49912, AHN58075	1.67e-104	64.8318	311.997	327	212	P:GO:0035220; P:GO:0016319; C:GO:0005829; P:GO:0022416; C:GO:0005654	P:wing disc development; P:mushroom body development; C:cytosol; P:chaeta development; C:nucleoplasm	F:GO:0016491; P:GO:0055114
TRINITY_GG_2655_c0_g1_i1	Lko057S001260	1	LOD2	uncharacterized protein Dmel_CG13900	4102	gi|24654874|ref|NP_728546.1|uncharacterized protein Dmel_CG13900, isoform A [Drosophila melanogaster] gi|23092721|gb|AAF47416.2| uncharacterized protein Dmel_CG13900, isoform A [Drosophila melanogaster] gi|60678131|gb|AAX33572.1| LD01809p [Drosophila melanogaster] gi|289803030|gb|ADD20765.1| FI04459p [Drosophila melanogaster]	NP_728546, AAF47416, AAX33572, ADD20765	0	87.4593	1901.33	1228	1074	F:GO:0003676; C:GO:0071013; C:GO:0071011; P:GO:0022008; C:GO:0005686; P:GO:0000398	F:nucleic acid binding; C:catalytic step 2 spliceosome; C:precatalytic spliceosome; P:neurogenesis; C:U2 snRNP; P:mRNA splicing, via spliceosome	F:GO:0003676; C:GO:0005634; F:GO:0005515
TRINITY_GG_2666_c0_g1_i1	Lko057S001260	1	LOD2	uncharacterized protein Dmel_CG17068 [Drosophila melanogaster]	1053	gi|19920390|ref|NP_608379.1|uncharacterized protein Dmel_CG17068 [Drosophila melanogaster] gi|7295616|gb|AAF50925.1| uncharacterized protein Dmel_CG17068 [Drosophila melanogaster] gi|16198287|gb|AAL13977.1| LP10161p [Drosophila melanogaster]	NP_608379, AAF50925, AAL13977	5e-13	60.241	71.2478	83	50	P:GO:0022008	P:neurogenesis	F:GO:0005515
TRINITY_GG_2664_c3_g1_i1	Lko057S001260	1	LOD2	uncharacterized protein Dmel_CG42390	2216	gi|221458383|ref|NP_732702.3|uncharacterized protein Dmel_CG42390, isoform B [Drosophila melanogaster] gi|442620409|ref|NP_001262825.1| uncharacterized protein Dmel_CG42390, isoform E [Drosophila melanogaster] gi|220903169|gb|AAF55957.4| uncharacterized protein Dmel_CG42390, isoform B [Drosophila melanogaster] gi|440217737|gb|AGB96205.1| uncharacterized protein Dmel_CG42390, isoform E [Drosophila…	NP_732702, NP_001262825, AAF55957, AGB96205	2.54e-07	51.1236	55.4546	178	91	P:GO:0008150; C:GO:0005575; F:GO:0003674	P:biological_process; C:cellular_component; F:molecular_function	no GO terms
TRINITY_GG_2942_c0_g1_i1	Lko057S001309	1	LOD2	AT16953p [Drosophila melanogaster]	1033	gi|21064095|gb|AAM29277.1|AT16953p [Drosophila melanogaster]	AAM29277	1.52e-34	60.7362	126.331	163	99	C:GO:0005778; P:GO:0008150; C:GO:0005777; P:GO:0001666; P:GO:0042592; C:GO:0016021; F:GO:0003674; C:GO:0005743; P:GO:0000002	C:peroxisomal membrane; P:biological_process; C:peroxisome; P:response to hypoxia; P:homeostatic process; C:integral component of membrane; F:molecular_function; C:mitochondrial inner membrane; P:mitochondrial genome maintenance	C:GO:0016021
TRINITY_GG_2941_c0_g1_i1;TRINITY_GG_2942_c2_g1_i1	Lko057S001309	1	LOD2	phosphodiesterase 1c	1012	gi|386769506|ref|NP_001245994.1|phosphodiesterase 1c, isoform H [Drosophila melanogaster] gi|383291452|gb|AFH03668.1| phosphodiesterase 1c, isoform H [Drosophila melanogaster]	NP_001245994, AFH03668	1.58e-60	64.557	209.534	237	153	P:GO:0060179;P:GO:0007154;P:GO:0008306;P:GO:0044700;P:GO:0007613;F:GO:0004115;C:GO:0005615;P:GO:0050794;P:GO:0046068;P:GO:0046058;F:GO:0048101;P:GO:0030154;P:GO:0019233;P:GO:0050896;P:GO:0007165;P:GO:0007268;P:GO:0042221;P:GO:0007623;P:GO:0001661;F:GO:0005516;P:GO:0007614;P:GO:0007615;P:GO:0048675;P:GO:0010738;P:GO:0046331;P:GO:0040040	P:malematingbehavior;P:cellcommunication;P:associativelearning;P:singleorganismsignaling;P:memory;F:3',5'-cyclic-AMPphosphodiesteraseactivity;C:extracellularspace;P:regulationofcellularprocess;P:cGMPmetabolicprocess;P:cAMPmetabolicprocess;F:calcium-andcalmodulin-regulated3',5'-cyclic-GMPphosphodiesteraseactivity;P:celldifferentiation;P:sensoryperceptionofpain;P:responsetostimulus;P:signaltransduc…	P:GO:0007165;F:GO:0004114;F:GO:0008081
TRINITY_GG_3057_c2_g1_i1	Lko057S001331	1	LOD2	aldehyde dehydrogenase [Drosophila melanogaster]	2219	gi|157738865|gb|ABV69001.1|aldehyde dehydrogenase [Drosophila melanogaster] gi|157738867|gb|ABV69002.1| aldehyde dehydrogenase [Drosophila melanogaster] gi|157738869|gb|ABV69003.1| aldehyde dehydrogenase [Drosophila melanogaster] gi|157738871|gb|ABV69004.1| aldehyde dehydrogenase [Drosophila melanogaster] gi|157738873|gb|ABV69005.1| aldehyde dehydrogenase [Drosophila melanogaster] gi|161511955|em…	ABV69001, ABV69002, ABV69003, ABV69004, ABV69005, CAP46844	5.54e-109	56.2092	342.428	459	258	C:GO:0005811; F:GO:0004029; P:GO:0009064; P:GO:0045471; P:GO:0046483; P:GO:1901360; C:GO:0005739; F:GO:0008774; P:GO:1901215; P:GO:0006117	C:lipid particle; F:aldehyde dehydrogenase (NAD) activity; P:glutamine family amino acid metabolic process; P:response to ethanol; P:heterocycle metabolic process; P:organic cyclic compound metabolic process; C:mitochondrion; F:acetaldehyde dehydrogenase (acetylating) activity; P:negative regulation of neuron death; P:acetaldehyde metabolic process	F:GO:0016491; P:GO:0008152; P:GO:0055114
TRINITY_GG_3053_c0_g1_i1	Lko057S001331	1	LOD2	beta-Mannosidase	4197	gi|442617271|ref|NP_001262242.1|beta-Mannosidase, isoform H [Drosophila melanogaster] gi|440217033|gb|AGB95625.1| beta-Mannosidase, isoform H [Drosophila melanogaster]	NP_001262242, AGB95625	1.66e-167	52.8899	526.168	917	485	P:GO:0005975; F:GO:0004553	P:carbohydrate metabolic process; F:hydrolase activity, hydrolyzing O-glycosyl compounds	P:GO:0005975; F:GO:0004553
TRINITY_GG_3049_c0_g1_i2;TRINITY_GG_3049_c1_g1_i1	Lko057S001331	1	LOD2	boudin [Drosophila melanogaster]	927	gi|18858019|ref|NP_572373.1|boudin [Drosophila melanogaster] gi|7290782|gb|AAF46227.1| boudin [Drosophila melanogaster] gi|17945627|gb|AAL48864.1| RE28342p [Drosophila melanogaster] gi|1049303591|gb|ANY27879.1| GEO07593p1, partial [Drosophila melanogaster]	NP_572373, AAF46227, AAL48864, ANY27879	6.93e-36	76.2887	127.487	97	74	P:GO:0044699;P:GO:0019991;P:GO:0035152;C:GO:0005576;C:GO:0046658	P:single-organismprocess;P:septatejunctionassembly;P:regulationoftubearchitecture,opentrachealsystem;C:extracellularregion;C:anchoredcomponentofplasmamembrane	noGOterms
TRINITY_GG_3057_c1_g1_i1;TRINITY_GG_3057_c1_g1_i2	Lko057S001331	1	LOD2	CG6000	689	gi|442620785|ref|NP_651210.3|CG6000, isoform C [Drosophila melanogaster] gi|665394910|ref|NP_001287495.1| CG6000, isoform D [Drosophila melanogaster] gi|440217822|gb|AAF56229.3| CG6000, isoform C [Drosophila melanogaster] gi|599127942|gb|AHN57494.1| CG6000, isoform D [Drosophila melanogaster]	NP_651210, NP_001287495, AAF56229, AHN57494	7.37e-23	63.4615	91.2781	104	66	F:GO:0004792	F:thiosulfatesulfurtransferaseactivity	noGOterms
TRINITY_GG_3056_c0_g1_i1	Lko057S001331	1	LOD2	CG6066 [Drosophila melanogaster]	2022	gi|24650530|ref|NP_651538.1|CG6066 [Drosophila melanogaster] gi|74868127|sp|Q9VB74.1|NKAP_DROME RecName: Full=NKAP family protein CG6066 gi|7301548|gb|AAF56669.1| CG6066 [Drosophila melanogaster]	NP_651538, Q9VB74, AAF56669	3.61e-56	89.7638	199.134	127	114	C:GO:0071013; P:GO:0019233; P:GO:0022008; P:GO:0000398	C:catalytic step 2 spliceosome; P:sensory perception of pain; P:neurogenesis; P:mRNA splicing, via spliceosome	P:GO:0007219; P:GO:0045892; F:GO:0003682
TRINITY_GG_3057_c3_g1_i1	Lko057S001331	1	LOD2	CG8417 [Drosophila melanogaster]	1543	gi|21356061|ref|NP_649940.1|CG8417 [Drosophila melanogaster] gi|7299246|gb|AAF54442.1| CG8417 [Drosophila melanogaster] gi|16076844|gb|AAL13350.1| GH10745p [Drosophila melanogaster] gi|18447596|gb|AAL68359.1| RH55676p [Drosophila melanogaster]	NP_649940, AAF54442, AAL13350, AAL68359	1.68e-96	60.2564	298.516	390	235	P:GO:0005975; F:GO:0008270; P:GO:0009298; F:GO:0004476	P:carbohydrate metabolic process; F:zinc ion binding; P:GDP-mannose biosynthetic process; F:mannose-6-phosphate isomerase activity	P:GO:0005975; F:GO:0008270; P:GO:0009298; F:GO:0004476
TRINITY_GG_3057_c5_g1_i1	Lko057S001331	1	LOD2	CG8483 [Drosophila melanogaster]	1357	gi|21357507|ref|NP_650264.1|CG8483 [Drosophila melanogaster] gi|15292113|gb|AAK93325.1| LD39025p [Drosophila melanogaster] gi|23171146|gb|AAF54913.2| CG8483 [Drosophila melanogaster]	NP_650264, AAK93325, AAF54913	1.94e-15	44.3878	78.5666	196	87	P:GO:0008150; P:GO:0032504; C:GO:0005576; F:GO:0003674	P:biological_process; P:multicellular organism reproduction; C:extracellular region; F:molecular_function	no GO terms
TRINITY_GG_3057_c4_g1_i1	Lko057S001331	1	LOD2	deterin [Drosophila melanogaster]	1225	gi|21355525|ref|NP_650608.1|deterin [Drosophila melanogaster] gi|7300235|gb|AAF55399.1| deterin [Drosophila melanogaster] gi|17946136|gb|AAL49109.1| RE55472p [Drosophila melanogaster] gi|1049303519|gb|ANY27843.1| GEO07887p1, partial [Drosophila melanogaster]	NP_650608, AAF55399, AAL49109, ANY27843	7.64e-28	63	108.227	100	63	P:GO:0045849; F:GO:0061631; P:GO:0000915; P:GO:0007110; F:GO:0061659; F:GO:0002020; P:GO:0007111; P:GO:0022008; C:GO:0000776; P:GO:0060429; C:GO:1990023; P:GO:0048584; P:GO:0000281; P:GO:0043154; P:GO:0045132; P:GO:0016477; P:GO:0007286; P:GO:0000209; P:GO:0009267; P:GO:0007423; P:GO:0042787; P:GO:0097340; C:GO:1990385; F:GO:0044390; F:GO:0004869; C:GO:0005737; P:GO:0048477; P:GO:0046331; P:GO:00…	P:negative regulation of nurse cell apoptotic process; F:ubiquitin conjugating enzyme activity; P:actomyosin contractile ring assembly; P:meiosis I cytokinesis; F:ubiquitin-like protein ligase activity; F:protease binding; P:meiosis II cytokinesis; P:neurogenesis; C:kinetochore; P:epithelium development; C:mitotic spindle midzone; P:positive regulation of response to stimulus; P:mitotic cytokines…	no GO terms
TRINITY_GG_3054_c0_g1_i1	Lko057S001331	1	LOD2	ebony [Drosophila melanogaster]	3001	gi|126789039|gb|ABO27282.1|ebony [Drosophila melanogaster]	ABO27282	0	69.7616	826.624	797	556	P:GO:0048022; P:GO:0042417; F:GO:0003833; P:GO:0043042; C:GO:0005737; P:GO:0045475; P:GO:0006583; P:GO:0001692; P:GO:0048085; P:GO:0048082	P:negative regulation of melanin biosynthetic process; P:dopamine metabolic process; F:beta-alanyl-dopamine synthase activity; P:amino acid adenylylation by nonribosomal peptide synthase; C:cytoplasm; P:locomotor rhythm; P:melanin biosynthetic process from tyrosine; P:histamine metabolic process; P:adult chitin-containing cuticle pigmentation; P:regulation of adult chitin-containing cuticle pigme…	F:GO:0003824; P:GO:0008152
TRINITY_GG_3052_c7_g1_i1	Lko057S001331	1	LOD2	heat shock protein 68 [Drosophila melanogaster]	1320	gi|17738165|ref|NP_524474.1|heat shock protein 68 [Drosophila melanogaster] gi|13124306|sp|O97125.1|HSP68_DROME RecName: Full=Heat shock protein 68 gi|4322942|gb|AAD16140.1| heat shock protein 68 [Drosophila melanogaster] gi|7301096|gb|AAF56230.1| heat shock protein 68 [Drosophila melanogaster] gi|20151743|gb|AAM11231.1| RE48592p [Drosophila melanogaster]	NP_524474, O97125, AAD16140, AAF56230, AAM11231	8.21e-134	81.3056	399.823	337	274	C:GO:0005811; P:GO:0001666; P:GO:0031427; P:GO:0008340; C:GO:0005739; P:GO:0035080; P:GO:0042594; F:GO:0051082; P:GO:0022008; P:GO:0006457; C:GO:0005875	C:lipid particle; P:response to hypoxia; P:response to methotrexate; P:determination of adult lifespan; C:mitochondrion; P:heat shock-mediated polytene chromosome puffing; P:response to starvation; F:unfolded protein binding; P:neurogenesis; P:protein folding; C:microtubule associated complex	no GO terms
TRINITY_GG_3052_c8_g1_i1	Lko057S001331	1	LOD2	hsp70Bb	683	gi|57165032|gb|AAW34355.1|hsp70Bb, partial [Drosophila melanogaster] gi|57165034|gb|AAW34356.1| hsp70Bb, partial [Drosophila melanogaster]	AAW34355, AAW34356	6.34e-109	88.0531	326.25	226	199	P:GO:0001666; P:GO:0035080; C:GO:0005875	P:response to hypoxia; P:heat shock-mediated polytene chromosome puffing; C:microtubule associated complex	no GO terms
TRINITY_GG_3052_c3_g1_i3	Lko057S001331	1	LOD2	LD02908p	1163	gi|218505987|gb|ABY21734.2|LD02908p, partial [Drosophila melanogaster]	ABY21734	1.7e-112	84.507	332.798	213	180	C:GO:0005811; F:GO:0003863; P:GO:0046949; C:GO:0017086; P:GO:0031122; C:GO:0005875	C:lipid particle; F:3-methyl-2-oxobutanoate dehydrogenase (2-methylpropanoyl-transferring) activity; P:fatty-acyl-CoA biosynthetic process; C:3-methyl-2-oxobutanoate dehydrogenase (lipoamide) complex; P:cytoplasmic microtubule organization; C:microtubule associated complex	no GO terms
TRINITY_GG_3049_c0_g1_i1	Lko057S001331	1	LOD2	PREDICTED: uncharacterized protein LOC103509939 isoform X2 [Diaphorina citri]	477	gi|662199266|ref|XP_008472791.1|PREDICTED: uncharacterized protein LOC103509939 isoform X2 [Diaphorina citri]	XP_008472791	6.16e-09	74.5098	58.9214	51	38	C:GO:0016020	C:membrane	no IPS match
TRINITY_GG_3055_c0_g1_i1	Lko057S001331	1	LOD2	RE20268p [Drosophila melanogaster]	2025	gi|68051255|gb|AAY84892.1|RE20268p [Drosophila melanogaster]	AAY84892	8.35e-115	65.5696	351.288	395	259	P:GO:0016458; P:GO:0043966; F:GO:0010484; P:GO:0046529; P:GO:0050829; P:GO:0009996; F:GO:0008134; P:GO:0022416; P:GO:0045944; P:GO:0034080; P:GO:0048813; C:GO:0005634; P:GO:0010906; F:GO:0003713; P:GO:0045089; P:GO:0045892; P:GO:0016360; P:GO:0048190; F:GO:0010485	P:gene silencing; P:histone H3 acetylation; F:H3 histone acetyltransferase activity; P:imaginal disc fusion, thorax closure; P:defense response to Gram-negative bacterium; P:negative regulation of cell fate specification; F:transcription factor binding; P:chaeta development; P:positive regulation of transcription from RNA polymerase II promoter; P:CENP-A containing nucleosome assembly; P:dendrite…	C:GO:0005634; F:GO:0004402; P:GO:0016573; P:GO:0006325; P:GO:0006348
TRINITY_GG_3052_c1_g1_i1	Lko057S001331	1	LOD2	RE25729p [Drosophila melanogaster]	423	gi|17945565|gb|AAL48834.1|RE25729p [Drosophila melanogaster]	AAL48834	3.68e-19	89.7959	82.8037	49	44	F:GO:0003863; P:GO:0046949; C:GO:0017086	F:3-methyl-2-oxobutanoate dehydrogenase (2-methylpropanoyl-transferring) activity; P:fatty-acyl-CoA biosynthetic process; C:3-methyl-2-oxobutanoate dehydrogenase (lipoamide) complex	F:GO:0003824; P:GO:0008152
TRINITY_GG_3056_c2_g1_i1	Lko057S001331	1	LOD2	uncharacterized protein Dmel_CG18812	3592	gi|24586353|ref|NP_724597.1|uncharacterized protein Dmel_CG18812, isoform C [Drosophila melanogaster] gi|122102783|sp|Q7JUR6.1|GDAP2_DROME RecName: Full=Protein GDAP2 homolog gi|21483250|gb|AAM52600.1| GH03014p [Drosophila melanogaster] gi|21645608|gb|AAG22308.2| uncharacterized protein Dmel_CG18812, isoform C [Drosophila melanogaster]	NP_724597, Q7JUR6, AAM52600, AAG22308	1.63e-160	73.8589	489.96	482	356	P:GO:0007370; P:GO:0007480; C:GO:0005769; P:GO:0051497; F:GO:0005096; C:GO:0055037; P:GO:0007266; F:GO:0017137; P:GO:0045887; P:GO:2001136	P:ventral furrow formation; P:imaginal disc-derived leg morphogenesis; C:early endosome; P:negative regulation of stress fiber assembly; F:GTPase activator activity; C:recycling endosome; P:Rho protein signal transduction; F:Rab GTPase binding; P:positive regulation of synaptic growth at neuromuscular junction; P:negative regulation of endocytic recycling	no GO terms
TRINITY_GG_3052_c3_g1_i1;TRINITY_GG_3052_c3_g1_i2	Lko057S001331	1	LOD2	uncharacterized protein Dmel_CG30497	4825	gi|24586361|ref|NP_724601.1|uncharacterized protein Dmel_CG30497, isoform C [Drosophila melanogaster] gi|442622849|ref|NP_001260791.1| uncharacterized protein Dmel_CG30497, isoform D [Drosophila melanogaster] gi|23240390|gb|AAN16139.1| uncharacterized protein Dmel_CG30497, isoform C [Drosophila melanogaster] gi|440214187|gb|AGB93324.1| uncharacterized protein Dmel_CG30497, isoform D [Drosophila m…	NP_724601, NP_001260791, AAN16139, AGB93324	1.22e-175	85.4227	538.88	343	293	F:GO:0003863;P:GO:0046949;C:GO:0017086;C:GO:0005829;C:GO:0005654;C:GO:0005811;P:GO:0031122;C:GO:0005875	F:3-methyl-2-oxobutanoatedehydrogenase(2-methylpropanoyl-transferring)activity;P:fatty-acyl-CoAbiosyntheticprocess;C:3-methyl-2-oxobutanoatedehydrogenase(lipoamide)complex;C:cytosol;C:nucleoplasm;C:lipidparticle;P:cytoplasmicmicrotubuleorganization;C:microtubuleassociatedcomplex	noGOterms
TRINITY_GG_3342_c1_g1_i1	Lko057S001400	1	LOD2	CG3967	1638	gi|24661593|ref|NP_729489.1|CG3967, isoform B [Drosophila melanogaster] gi|442631295|ref|NP_001261628.1| CG3967, isoform F [Drosophila melanogaster] gi|7294947|gb|AAF50276.1| CG3967, isoform B [Drosophila melanogaster] gi|440215540|gb|AGB94323.1| CG3967, isoform F [Drosophila melanogaster]	NP_729489, NP_001261628, AAF50276, AGB94323	5.79e-44	63.1579	158.688	190	120	P:GO:0019233; P:GO:0048149	P:sensory perception of pain; P:behavioral response to ethanol	P:GO:0071929; F:GO:0019799; C:GO:0005874
TRINITY_GG_3336_c0_g1_i1	Lko057S001400	1	LOD2	Chromatin assembly factor 1 subunit A [Zootermopsis nevadensis]	1404	gi|646716221|gb|KDR19550.1|Chromatin assembly factor 1 subunit A [Zootermopsis nevadensis]	KDR19550	0.000286	56.1644	52.373	73	41			no GO terms
TRINITY_GG_3336_c1_g1_i1	Lko057S001400	1	LOD2	chromatin assembly factor 1, p180 subunit [Drosophila melanogaster]	2175	gi|18858189|ref|NP_572495.1|chromatin assembly factor 1, p180 subunit [Drosophila melanogaster] gi|13569827|gb|AAK31263.1|AF367177_1 chromatin assembly factor-1 p180 subunit [Drosophila melanogaster] gi|7290959|gb|AAF46399.1| chromatin assembly factor 1, p180 subunit [Drosophila melanogaster]	NP_572495, AAK31263, AAF46399	3e-28	49.6732	122.865	459	228	P:GO:0044699; P:GO:0009987	P:single-organism process; P:cellular process	no GO terms
TRINITY_GG_3333_c1_g1_i1	Lko057S001400	1	LOD2	GH18717p [Drosophila melanogaster]	912	gi|17861656|gb|AAL39305.1|GH18717p [Drosophila melanogaster]	AAL39305	3.39e-24	44.5483	102.834	321	143	F:GO:0005524; P:GO:0006298; F:GO:0030983	F:ATP binding; P:mismatch repair; F:mismatched DNA binding	F:GO:0005524; P:GO:0006298; F:GO:0030983
TRINITY_GG_3334_c2_g1_i1	Lko057S001400	1	LOD2	hypothetical protein M513_12603 [Trichuris suis]	556	gi|669302885|gb|KFD46518.1|hypothetical protein M513_12603 [Trichuris suis]	KFD46518	0.000513	58.8235	46.2098	68	40			no IPS match
TRINITY_GG_3333_c0_g1_i1;TRINITY_GG_3333_c2_g1_i1;TRINITY_GG_3333_c3_g1_i1	Lko057S001400	1	LOD2	Mlh1	257	gi|442622879|ref|NP_001260799.1|Mlh1, isoform B [Drosophila melanogaster] gi|440214195|gb|AGB93332.1| Mlh1, isoform B [Drosophila melanogaster]	NP_001260799, AGB93332	1.76e-10	59.5238	56.225	84	50	F:GO:0097159;F:GO:1901363;C:GO:0005875;F:GO:0005524;P:GO:0006298;F:GO:0030983	F:organiccycliccompoundbinding;F:heterocycliccompoundbinding;C:microtubuleassociatedcomplex;F:ATPbinding;P:mismatchrepair;F:mismatchedDNAbinding	noGOterms;F:GO:0005524;P:GO:0006298;F:GO:0030983
TRINITY_GG_3334_c0_g1_i1;TRINITY_GG_3334_c0_g1_i2	Lko057S001400	1	LOD2	uncharacterized protein Dmel_CG11737	710	gi|21355291|ref|NP_649803.1|uncharacterized protein Dmel_CG11737, isoform A [Drosophila melanogaster] gi|442617988|ref|NP_001262370.1| uncharacterized protein Dmel_CG11737, isoform B [Drosophila melanogaster] gi|442617990|ref|NP_001262371.1| uncharacterized protein Dmel_CG11737, isoform C [Drosophila melanogaster] gi|7299045|gb|AAF54246.1| uncharacterized protein Dmel_CG11737, isoform A [Drosophi…	NP_649803, NP_001262370, NP_001262371, AAF54246, AAL48659, AGB95752, AGB95753	1.01e-26	67.4797	107.842	123	83	C:GO:0005777;P:GO:0007031;F:GO:0003674	C:peroxisome;P:peroxisomeorganization;F:molecular_function	noGOterms
TRINITY_GG_3344_c0_g1_i1	Lko057S001400	1	LOD2	uncharacterized protein Dmel_CG12236	437	gi|24640002|ref|NP_727050.1|uncharacterized protein Dmel_CG12236, isoform A [Drosophila melanogaster] gi|7290651|gb|AAF46100.1| uncharacterized protein Dmel_CG12236, isoform A [Drosophila melanogaster] gi|94400522|gb|ABF17901.1| FI01104p [Drosophila melanogaster]	NP_727050, AAF46100, ABF17901	0.000826	43.956	39.2762	91	40	F:GO:0003676; F:GO:0046872	F:nucleic acid binding; F:metal ion binding	no GO terms
TRINITY_GG_3342_c0_g1_i1	Lko057S001400	1	LOD2	uncharacterized protein Dmel_CG13855 [Drosophila melanogaster]	4532	gi|24648985|ref|NP_651037.1|uncharacterized protein Dmel_CG13855 [Drosophila melanogaster] gi|7300846|gb|AAF55988.1| uncharacterized protein Dmel_CG13855 [Drosophila melanogaster]	NP_651037, AAF55988	1.23e-66	46.2334	241.506	677	313			F:GO:0005515; F:GO:0005488
TRINITY_GG_3337_c0_g1_i1	Lko057S001400	1	LOD2	uncharacterized protein Dmel_CG32647	3374	gi|24641616|ref|NP_727642.1|uncharacterized protein Dmel_CG32647, isoform A [Drosophila melanogaster] gi|24641618|ref|NP_727643.1| uncharacterized protein Dmel_CG32647, isoform B [Drosophila melanogaster] gi|665390983|ref|NP_001285168.1| uncharacterized protein Dmel_CG32647, isoform C [Drosophila melanogaster] gi|665390985|ref|NP_001285169.1| uncharacterized protein Dmel_CG32647, isoform D [Droso…	NP_727642, NP_727643, NP_001285168, NP_001285169, AAM48462, AAF48202, AAF48203, AEQ05543, AHN59638, AHN59639	2.19e-33	80.2469	130.183	81	65	P:GO:0008150; C:GO:0005575; F:GO:0003674	P:biological_process; C:cellular_component; F:molecular_function	no IPS match
TRINITY_GG_4721_c0_g1_i1	Lko057S001652	1	LOD2	CG8003	1678	gi|21355925|ref|NP_648406.1|CG8003, isoform A [Drosophila melanogaster] gi|442631568|ref|NP_001261683.1| CG8003, isoform B [Drosophila melanogaster] gi|7294808|gb|AAF50142.1| CG8003, isoform A [Drosophila melanogaster] gi|16769502|gb|AAL28970.1| LD35289p [Drosophila melanogaster] gi|440215604|gb|AGB94377.1| CG8003, isoform B [Drosophila melanogaster]	NP_648406, NP_001261683, AAF50142, AAL28970, AGB94377	1.47e-117	63.4921	354.755	378	240	F:GO:0043167; P:GO:0007155; P:GO:0048513; C:GO:0044444	F:ion binding; P:cell adhesion; P:animal organ development; C:cytoplasmic part	F:GO:0005515
TRINITY_GG_4719_c1_g1_i1;TRINITY_GG_4720_c0_g1_i1;TRINITY_GG_4720_c3_g1_i1	Lko057S001652	1	LOD2	Utx histone demethylase	233	gi|45550177|ref|NP_609368.3|Utx histone demethylase, isoform A [Drosophila melanogaster] gi|21744241|gb|AAM76179.1| LD05703p [Drosophila melanogaster] gi|33589582|gb|AAQ22558.1| LD02225p [Drosophila melanogaster] gi|45445077|gb|AAF52897.3| Utx histone demethylase, isoform A [Drosophila melanogaster]	NP_609368, AAM76179, AAQ22558, AAF52897	3.58e-09	65.3846	51.9878	78	51	P:GO:1902465;P:GO:0008285;P:GO:0045498;P:GO:0035072;P:GO:0045746;P:GO:0071390;C:GO:0044666;F:GO:0001047;P:GO:0010508;P:GO:0042060;P:GO:0071480;F:GO:0005515;C:GO:0005705;P:GO:0045893;P:GO:1990248;C:GO:0035327;P:GO:0071557;F:GO:0071558;P:GO:0051568	P:negativeregulationofhistoneH3-K27trimethylation;P:negativeregulationofcellproliferation;P:sexcombdevelopment;P:ecdysone-mediatedinductionofsalivaryglandcellautophagiccelldeath;P:negativeregulationofNotchsignalingpathway;P:cellularresponsetoecdysone;C:MLL3/4complex;F:corepromoterbinding;P:positiveregulationofautophagy;P:woundhealing;P:cellularresponsetogammaradiation;F:proteinbinding;C:polytenec…	noGOterms;F:GO:0005515
TRINITY_GG_9098_c1_g1_i1;TRINITY_GG_9098_c1_g1_i4;TRINITY_GG_9098_c1_g1_i5;TRINITY_GG_9098_c1_g1_i6	Lko057S002027	1	LOD2	darkener of apricot	5779	gi|221460167|ref|NP_001014681.2|darkener of apricot, isoform P [Drosophila melanogaster] gi|220903246|gb|AAO41610.2| darkener of apricot, isoform P [Drosophila melanogaster]	NP_001014681, AAO41610	0	87.0423	602.823	355	309	P:GO:0007350;P:GO:0046777;C:GO:0005783;P:GO:0035071;P:GO:0048854;F:GO:0004674;P:GO:0009306;C:GO:0005875;C:GO:0005634;F:GO:0005524;P:GO:0000165;P:GO:0007548;P:GO:0031987;P:GO:0001964;P:GO:0042051;P:GO:0000381;P:GO:0030717;P:GO:2000255;P:GO:0034125	P:blastodermsegmentation;P:proteinautophosphorylation;C:endoplasmicreticulum;P:salivaryglandcellautophagiccelldeath;P:brainmorphogenesis;F:proteinserine/threoninekinaseactivity;P:proteinsecretion;C:microtubuleassociatedcomplex;C:nucleus;F:ATPbinding;P:MAPKcascade;P:sexdifferentiation;P:locomotioninvolvedinlocomotorybehavior;P:startleresponse;P:compoundeyephotoreceptordevelopment;P:regulationofalt…	noGOterms;F:GO:0005524;F:GO:0004672;P:GO:0006468
TRINITY_GG_9095_c0_g1_i1	Lko057S002027	1	LOD2	uncharacterized protein Dmel_CG14903 [Drosophila melanogaster]	798	gi|24647481|ref|NP_650561.1|uncharacterized protein Dmel_CG14903 [Drosophila melanogaster] gi|7300169|gb|AAF55335.1| uncharacterized protein Dmel_CG14903 [Drosophila melanogaster]	NP_650561, AAF55335	5.9e-34	66.3717	120.168	113	75	P:GO:0008150; F:GO:0004045; C:GO:0005575; F:GO:0003674	P:biological_process; F:aminoacyl-tRNA hydrolase activity; C:cellular_component; F:molecular_function	F:GO:0004045
TRINITY_GG_9098_c0_g1_i1;TRINITY_GG_9098_c0_g1_i2	Lko057S002027	1	LOD2	uncharacterized protein Dmel_CG31122	3360	gi|281362035|ref|NP_001163647.1|uncharacterized protein Dmel_CG31122, isoform B [Drosophila melanogaster] gi|21744261|gb|AAM76189.1| LD22337p [Drosophila melanogaster] gi|272477041|gb|ACZ94943.1| uncharacterized protein Dmel_CG31122, isoform B [Drosophila melanogaster]	NP_001163647, AAM76189, ACZ94943	7.09e-64	87.4172	227.254	151	132	P:GO:0046331	P:lateralinhibition	noGOterms
TRINITY_GG_10449_c0_g1_i2	Lko057S002598	1	LOD2	CG18508 [Drosophila melanogaster]	2155	gi|63029206|gb|AAY27479.1|CG18508 [Drosophila melanogaster] gi|63029221|gb|AAY27491.1| CG18508 [Drosophila melanogaster] gi|63029226|gb|AAY27495.1| CG18508 [Drosophila melanogaster] gi|63029231|gb|AAY27499.1| CG18508 [Drosophila melanogaster] gi|63029236|gb|AAY27503.1| CG18508 [Drosophila melanogaster] gi|63029241|gb|AAY27507.1| CG18508 [Drosophila melanogaster] gi|63029246|gb|AAY27511.1| CG18508…	AAY27479, AAY27491, AAY27495, AAY27499, AAY27503, AAY27507, AAY27511, AAY27515, AAY27523, AAY27527, AAY27531, AAY27535	1.5e-09	86.4865	56.6102	37	32
TRINITY_GG_10450_c0_g1_i1	Lko057S002598	1	LOD2	integrator 9 [Drosophila melanogaster]	434	gi|28574894|ref|NP_648838.3|integrator 9 [Drosophila melanogaster] gi|74938252|sp|Q95TS5.1|INT9_DROME RecName: Full=Integrator complex subunit 9 gi|16184460|gb|AAL13803.1| LD26912p [Drosophila melanogaster] gi|28380509|gb|AAF49538.2| integrator 9 [Drosophila melanogaster]	NP_648838, Q95TS5, AAL13803, AAF49538	3.08e-14	63.2911	69.3218	79	50	P:GO:0016071; C:GO:0044451; P:GO:0034472; C:GO:0043234	P:mRNA metabolic process; C:nucleoplasm part; P:snRNA 3'-end processing; C:protein complex	no IPS match
TRINITY_GG_10449_c0_g1_i1	Lko057S002598	1	LOD2	uncharacterized protein Dmel_CG18508	2140	gi|24639456|ref|NP_652721.1|uncharacterized protein Dmel_CG18508, isoform A [Drosophila melanogaster] gi|665389442|ref|NP_001284836.1| uncharacterized protein Dmel_CG18508, isoform B [Drosophila melanogaster] gi|74873263|sp|O97172.1|U729_DROME RecName: Full=UPF0729 protein CG18508 gi|6691843|emb|CAB37612.1| EG:140G11.3 [Drosophila melanogaster] gi|7290391|gb|AAF45849.1| uncharacterized protein Dm…	NP_652721, NP_001284836, O97172, CAB37612, AAF45849, AAY27430, AAY27435, AAY27439, AAY27443, AAY27447, AAY27451, AAY27455, AAY27459, AAY27463, AAY27467, AAY27471, AAY27475, AAY27483, AAY27487, AAY27519, AEC46872, AHN59307	1.04e-09	86.4865	56.9954	37	32			no GO terms
TRINITY_GG_10993_c18_g1_i1	Lko057S002879	1	LOD2	CG3955 [Drosophila melanogaster]	437	gi|19922148|ref|NP_610837.1|CG3955 [Drosophila melanogaster] gi|7303368|gb|AAF58427.1| CG3955 [Drosophila melanogaster] gi|16767864|gb|AAL28150.1| GH01933p [Drosophila melanogaster]	NP_610837, AAF58427, AAL28150	1.59e-30	65.8537	109.768	123	81	P:GO:0019233	P:sensory perception of pain	no GO terms
TRINITY_GG_10994_c1_g1_i1;TRINITY_GG_3762_c0_g1_i1	Lko057S002879	1	LOD2	CG7120	658	gi|281365839|ref|NP_648218.2|CG7120, isoform E [Drosophila melanogaster] gi|386770792|ref|NP_001246668.1| CG7120, isoform D [Drosophila melanogaster] gi|272455098|gb|AAF50426.2| CG7120, isoform E [Drosophila melanogaster] gi|383291811|gb|AFH04339.1| CG7120, isoform D [Drosophila melanogaster]	NP_648218, NP_001246668, AAF50426, AFH04339	1.08e-37	54.5872	139.428	218	119	C:GO:0005615;P:GO:0032504;F:GO:0003824;P:GO:0008152;P:GO:0019233	C:extracellularspace;P:multicellularorganismreproduction;F:catalyticactivity;P:metabolicprocess;P:sensoryperceptionofpain	noGOterms
TRINITY_GG_10994_c0_g1_i1	Lko057S002879	1	LOD2	uncharacterized protein Dmel_CG15695 [Drosophila melanogaster]	1157	gi|28571787|ref|NP_650920.3|uncharacterized protein Dmel_CG15695 [Drosophila melanogaster] gi|18447431|gb|AAL68279.1| RE26721p [Drosophila melanogaster] gi|28381384|gb|AAF55813.2| uncharacterized protein Dmel_CG15695 [Drosophila melanogaster]	NP_650920, AAL68279, AAF55813	5.36e-56	47.8006	196.438	341	163	C:GO:0005615; P:GO:0032504; F:GO:0003824; P:GO:0008152; P:GO:0019233; C:GO:0005575; F:GO:0003674	C:extracellular space; P:multicellular organism reproduction; F:catalytic activity; P:metabolic process; P:sensory perception of pain; C:cellular_component; F:molecular_function	F:GO:0003824; P:GO:0008152
TRINITY_GG_11355_c2_g1_i1	Lko057S003066	1	LOD2	defective proboscis extension response 9	476	gi|45580808|ref|NP_996215.1|defective proboscis extension response 9, isoform A [Drosophila melanogaster] gi|665394116|ref|NP_001287332.1| defective proboscis extension response 9, isoform B [Drosophila melanogaster] gi|20976810|gb|AAM27480.1| GH01517p [Drosophila melanogaster] gi|45446489|gb|AAF55121.3| defective proboscis extension response 9, isoform A [Drosophila melanogaster] gi|599127753|gb…	NP_996215, NP_001287332, AAM27480, AAF55121, AHN57331	9e-19	91.1111	82.8037	45	41	C:GO:0005887; P:GO:0007529; P:GO:0007606; P:GO:1904396; P:GO:0072499; P:GO:0048149; C:GO:0005576; P:GO:0050965; C:GO:0032589; P:GO:0008039	C:integral component of plasma membrane; P:establishment of synaptic specificity at neuromuscular junction; P:sensory perception of chemical stimulus; P:regulation of neuromuscular junction development; P:photoreceptor cell axon guidance; P:behavioral response to ethanol; C:extracellular region; P:detection of temperature stimulus involved in sensory perception of pain; C:neuron projection membra…	no IPS match
TRINITY_GG_11356_c0_g1_i1;TRINITY_GG_11356_c1_g1_i1	Lko057S003066	1	LOD2	uncharacterized protein Dmel_CG17829	1310	gi|24638914|ref|NP_726685.1|uncharacterized protein Dmel_CG17829, isoform C [Drosophila melanogaster] gi|7290064|gb|AAF45530.1| uncharacterized protein Dmel_CG17829, isoform C [Drosophila melanogaster]	NP_726685, AAF45530	1.14e-54	55.6777	189.119	273	152	F:GO:0003677;P:GO:0006355;C:GO:0005694;P:GO:0048523;C:GO:0044446;F:GO:0003676;F:GO:0046872	F:DNAbinding;P:regulationoftranscription,DNA-templated;C:chromosome;P:negativeregulationofcellularprocess;C:intracellularorganellepart;F:nucleicacidbinding;F:metalionbinding	F:GO:0003676
TRINITY_GG_11606_c0_g1_i1	Lko057S003170	1	LOD2	CG5642 [Drosophila melanogaster]	2507	gi|21358039|ref|NP_648553.1|CG5642 [Drosophila melanogaster] gi|74870903|sp|Q9VTU4.1|EIF3L_DROME RecName: Full=Eukaryotic translation initiation factor 3 subunit L; Short=eIF3l gi|7294613|gb|AAF49952.1| CG5642 [Drosophila melanogaster] gi|19528461|gb|AAL90345.1| RE21692p [Drosophila melanogaster]	NP_648553, Q9VTU4, AAF49952, AAL90345	0	76.2162	627.476	555	423	F:GO:0003743; P:GO:0048812; C:GO:0005829; P:GO:0006413; C:GO:0005852	F:translation initiation factor activity; P:neuron projection morphogenesis; C:cytosol; P:translational initiation; C:eukaryotic translation initiation factor 3 complex	F:GO:0003743; C:GO:0005737; C:GO:0005852
TRINITY_GG_11607_c3_g1_i1	Lko057S003170	1	LOD2	CG9657	3225	gi|24640370|ref|NP_572397.1|CG9657, isoform A [Drosophila melanogaster] gi|665390134|ref|NP_001284983.1| CG9657, isoform B [Drosophila melanogaster] gi|22831892|gb|AAF46260.2| CG9657, isoform A [Drosophila melanogaster] gi|226958694|gb|ACO95724.1| FI02094p [Drosophila melanogaster] gi|599137673|gb|AHN59454.1| CG9657, isoform B [Drosophila melanogaster]	NP_572397, NP_001284983, AAF46260, ACO95724, AHN59454	3.85e-120	65.0206	382.874	486	316	P:GO:0051780; P:GO:0008343; C:GO:0016323	P:behavioral response to nutrient; P:adult feeding behavior; C:basolateral plasma membrane	P:GO:0055085; C:GO:0016020; P:GO:0006810; F:GO:0005215
TRINITY_GG_11611_c0_g1_i1	Lko057S003170	1	LOD2	GABA transporter	4619	gi|45550877|ref|NP_651930.2|GABA transporter, isoform A [Drosophila melanogaster] gi|33589404|gb|AAQ22469.1| RE30213p [Drosophila melanogaster] gi|45444794|gb|AAF59327.4| GABA transporter, isoform A [Drosophila melanogaster]	NP_651930, AAQ22469, AAF59327	2.99e-168	64.9186	521.931	553	359	F:GO:0015222; F:GO:0005261; P:GO:0042066; F:GO:0015370; F:GO:0005034; C:GO:0043679; P:GO:0009414; C:GO:0097386; P:GO:0047484; P:GO:0051610; P:GO:0071260; P:GO:0050891; P:GO:0006909; C:GO:0016323; P:GO:0019226; C:GO:0030424	F:serotonin transmembrane transporter activity; F:cation channel activity; P:perineurial glial growth; F:solute:sodium symporter activity; F:osmosensor activity; C:axon terminus; P:response to water deprivation; C:glial cell projection; P:regulation of response to osmotic stress; P:serotonin uptake; P:cellular response to mechanical stimulus; P:multicellular organismal water homeostasis; P:phagoc…	P:GO:0006836; F:GO:0005328; C:GO:0016021
TRINITY_GG_11610_c0_g1_i1	Lko057S003170	1	LOD2	Poly(ADP-ribose) glycohydrolase ARH3 [Zootermopsis nevadensis]	1677	gi|646710433|gb|KDR15952.1|Poly(ADP-ribose) glycohydrolase ARH3 [Zootermopsis nevadensis]	KDR15952	5.64e-128	76.5217	385.571	345	264	F:GO:0016787	F:hydrolase activity	no GO terms
TRINITY_GG_11608_c0_g1_i1	Lko057S003170	1	LOD2	PREDICTED: leucine-rich repeat-containing protein 23-like [Dufourea novaeangliae]	1253	gi|987905670|ref|XP_015440433.1|PREDICTED: leucine-rich repeat-containing protein 23-like [Dufourea novaeangliae]	XP_015440433	2.78e-50	65.1568	180.259	287	187			F:GO:0005515
TRINITY_GG_11613_c0_g1_i1	Lko057S003170	1	LOD2	PREDICTED: LOW QUALITY PROTEIN: uncharacterized protein LOC107045953 [Diachasma alloeum]	335	gi|970914978|ref|XP_015123866.1|PREDICTED: LOW QUALITY PROTEIN: uncharacterized protein LOC107045953 [Diachasma alloeum]	XP_015123866	0.00011	51.6854	47.7506	89	46			no IPS match
TRINITY_GG_11603_c11_g1_i1;TRINITY_GG_11603_c15_g1_i1	Lko057S003170	1	LOD2	PREDICTED: uncharacterized protein LOC109030048	302	gi|1101341499|ref|XP_018896347.1|PREDICTED: uncharacterized protein LOC109030048, partial [Bemisia tabaci]	XP_018896347	4.91e-09	68.4211	59.6918	57	39			noIPSmatch
TRINITY_GG_11607_c0_g1_i1	Lko057S003170	1	LOD2	RE69201p [Drosophila melanogaster]	2198	gi|66771641|gb|AAY55132.1|RE69201p [Drosophila melanogaster]	AAY55132	1.33e-147	82.4324	442.58	296	244	C:GO:0005887; P:GO:0007529; P:GO:1904396; P:GO:0072499; C:GO:0032589	C:integral component of plasma membrane; P:establishment of synaptic specificity at neuromuscular junction; P:regulation of neuromuscular junction development; P:photoreceptor cell axon guidance; C:neuron projection membrane	no GO terms
TRINITY_GG_11609_c0_g1_i1	Lko057S003170	1	LOD2	regulatory particle non-ATPase 7 [Drosophila melanogaster]	1339	gi|21355773|ref|NP_651048.1|regulatory particle non-ATPase 7 [Drosophila melanogaster] gi|20978559|sp|Q9V3G7.1|PSMD6_DROME RecName: Full=26S proteasome non-ATPase regulatory subunit 6; AltName: Full=26S proteasome regulatory subunit S10; AltName: Full=Protein Rpn7 gi|6434954|gb|AAF08389.1|AF145308_1 26S proteasome regulatory complex subunit p42A [Drosophila melanogaster] gi|7300859|gb|AAF56000.1|…	NP_651048, Q9V3G7, AAF08389, AAF56000, AAK93432	0	84.8329	597.43	389	330	P:GO:0043161; F:GO:0005515; P:GO:0022008; C:GO:0008541	P:proteasome-mediated ubiquitin-dependent protein catabolic process; F:protein binding; P:neurogenesis; C:proteasome regulatory particle, lid subcomplex	F:GO:0005515
TRINITY_GG_11602_c0_g1_i1;TRINITY_GG_11602_c0_g1_i2	Lko057S003170	1	LOD2	RNA-binding protein 1	1096	gi|24645769|ref|NP_731510.1|RNA-binding protein 1, isoform D [Drosophila melanogaster] gi|55584177|sp|Q02427.3|RBP1_DROME RecName: Full=RNA-binding protein 1 gi|17861840|gb|AAL39397.1| GM02602p [Drosophila melanogaster] gi|23170942|gb|AAN13487.1| RNA-binding protein 1, isoform D [Drosophila melanogaster]	NP_731510, Q02427, AAL39397, AAN13487	5.68e-44	91.358	149.828	81	74	P:GO:0007095;F:GO:0008270;C:GO:0035062;P:GO:0007067;P:GO:0022008;F:GO:0000166;P:GO:0001178;C:GO:0005700;F:GO:0003677;P:GO:0045292;F:GO:0005515;C:GO:0071013;P:GO:0000381;P:GO:0001745;C:GO:0071011;P:GO:0048025;C:GO:0035327;F:GO:0003729;P:GO:0019233;P:GO:0031440	P:mitoticG2DNAdamagecheckpoint;F:zincionbinding;C:omegaspeckle;P:mitoticnucleardivision;P:neurogenesis;F:nucleotidebinding;P:regulationoftranscriptionalstartsiteselectionatRNApolymeraseIIpromoter;C:polytenechromosome;F:DNAbinding;P:mRNAcissplicing,viaspliceosome;F:proteinbinding;C:catalyticstep2spliceosome;P:regulationofalternativemRNAsplicing,viaspliceosome;P:compoundeyemorphogenesis;C:precataly…	F:GO:0003676
TRINITY_GG_11601_c0_g1_i1;TRINITY_GG_11603_c0_g1_i1;TRINITY_GG_11603_c2_g1_i1	Lko057S003170	1	LOD2	troponin C at 41C	878	gi|24585801|ref|NP_523619.2|troponin C at 41C, isoform A [Drosophila melanogaster] gi|386767088|ref|NP_001246139.1| troponin C at 41C, isoform B [Drosophila melanogaster] gi|19860033|sp|P47947.2|TNNC1_DROME RecName: Full=Troponin C, isoform 1 gi|7302258|gb|AAF57350.1| troponin C at 41C, isoform A [Drosophila melanogaster] gi|18447560|gb|AAL68341.1| RH07835p [Drosophila melanogaster] gi|383302254|…	NP_523619, NP_001246139, P47947, AAF57350, AAL68341, AFH07894, ANY27294	2.69e-73	85.4305	223.016	151	129	P:GO:0046716;P:GO:0007099;P:GO:0060361;P:GO:0006468;C:GO:0005875;C:GO:0005654;P:GO:0007605;F:GO:0005509;P:GO:0051383;P:GO:0007608;C:GO:0031475;C:GO:0005829;C:GO:0031476;P:GO:0030048;C:GO:0070865;P:GO:2001020;P:GO:0035071;C:GO:0005886;P:GO:0051533;C:GO:0097431;P:GO:0016060;P:GO:0016061;P:GO:0072499;C:GO:0005814;P:GO:0016062;P:GO:0042052;P:GO:0046331;P:GO:2001259;C:GO:0030496;C:GO:0016028;F:GO:0031…	P:musclecellcellularhomeostasis;P:centriolereplication;P:flight;P:proteinphosphorylation;C:microtubuleassociatedcomplex;C:nucleoplasm;P:sensoryperceptionofsound;F:calciumionbinding;P:kinetochoreorganization;P:sensoryperceptionofsmell;C:myosinVcomplex;C:cytosol;C:myosinVIcomplex;P:actinfilament-basedmovement;C:investmentcone;P:regulationofresponsetoDNAdamagestimulus;P:salivaryglandcellautophagicce…	F:GO:0005509;noIPSmatch
TRINITY_GG_11604_c0_g1_i1	Lko057S003170	1	LOD2	troponin C at 47D	212	gi|17136890|ref|NP_476968.1|troponin C at 47D, isoform A [Drosophila melanogaster] gi|665400188|ref|NP_001286310.1| troponin C at 47D, isoform B [Drosophila melanogaster] gi|68068004|sp|P47948.2|TNNC2_DROME RecName: Full=Troponin C, isoform 2 gi|7303635|gb|AAF58687.1| troponin C at 47D, isoform A [Drosophila melanogaster] gi|157816314|gb|ABV82151.1| FI01417p [Drosophila melanogaster] gi|599126827…	NP_476968, NP_001286310, P47948, AAF58687, ABV82151, AHN56108, ANY27395	1.86e-20	81.4286	79.7221	70	57	P:GO:0046716; P:GO:0007099; P:GO:0060361; P:GO:0006468; C:GO:0005875; C:GO:0005654; P:GO:0007605; F:GO:0005509; P:GO:0051383; P:GO:0007608; C:GO:0031475; C:GO:0005829; C:GO:0031476; P:GO:0030048; P:GO:2001020; P:GO:0035071; C:GO:0005886; P:GO:0051533; C:GO:0097431; P:GO:0016060; P:GO:0016061; P:GO:0072499; C:GO:0005814; P:GO:0016062; P:GO:0042052; P:GO:0046331; P:GO:2001259; C:GO:0030496; C:GO:00…	P:muscle cell cellular homeostasis; P:centriole replication; P:flight; P:protein phosphorylation; C:microtubule associated complex; C:nucleoplasm; P:sensory perception of sound; F:calcium ion binding; P:kinetochore organization; P:sensory perception of smell; C:myosin V complex; C:cytosol; C:myosin VI complex; P:actin filament-based movement; P:regulation of response to DNA damage stimulus; P:sal…	F:GO:0005509
TRINITY_GG_11603_c3_g1_i1	Lko057S003170	1	LOD2	uncharacterized protein Dmel_CG14762	1378	gi|386767396|ref|NP_001246198.1|uncharacterized protein Dmel_CG14762, isoform B [Drosophila melanogaster] gi|269847881|gb|ACZ48702.1| MIP14966p [Drosophila melanogaster] gi|383302334|gb|AFH07953.1| uncharacterized protein Dmel_CG14762, isoform B [Drosophila melanogaster]	NP_001246198, ACZ48702, AFH07953	2.81e-176	79.8186	504.212	441	352	P:GO:0050794; P:GO:0002009; P:GO:0007154; C:GO:0044464; P:GO:0007411; P:GO:0044700	P:regulation of cellular process; P:morphogenesis of an epithelium; P:cell communication; C:cell part; P:axon guidance; P:single organism signaling	F:GO:0005515
TRINITY_GG_12103_c0_g1_i1	Lko057S003481	1	LOD2	ankyrin 2	4086	gi|665410039|ref|NP_001286972.1|ankyrin 2, isoform AA [Drosophila melanogaster] gi|599131173|gb|AHN57997.1| ankyrin 2, isoform AA [Drosophila melanogaster]	NP_001286972, AHN57997	8.13e-26	47.8102	117.857	274	131	P:GO:0065008; C:GO:0098793; P:GO:0050794; P:GO:0007010; C:GO:0044444; P:GO:0044763; P:GO:0050877; C:GO:0005886	P:regulation of biological quality; C:presynapse; P:regulation of cellular process; P:cytoskeleton organization; C:cytoplasmic part; P:single-organism cellular process; P:neurological system process; C:plasma membrane	F:GO:0005515; P:GO:0007165
TRINITY_GG_12102_c0_g1_i1	Lko057S003481	1	LOD2	keren [Drosophila melanogaster]	1811	gi|17737613|ref|NP_524129.1|keren [Drosophila melanogaster] gi|7533127|gb|AAF63381.1|AF245387_1 Keren [Drosophila melanogaster] gi|7293956|gb|AAF49315.1| keren [Drosophila melanogaster] gi|16648366|gb|AAL25448.1| LD34429p [Drosophila melanogaster]	NP_524129, AAF63381, AAF49315, AAL25448	2.03e-35	72	133.65	100	72	P:GO:0061331; P:GO:0007173; P:GO:0008284; F:GO:0005154; P:GO:0007432; P:GO:0007476; C:GO:0005794; P:GO:0007298; P:GO:0045741; C:GO:0005576; P:GO:0003015; P:GO:0045470; P:GO:0000165; P:GO:0000086; P:GO:0016330; P:GO:0035277; P:GO:0016318; P:GO:0007421; P:GO:0007422; C:GO:0005783; P:GO:0008355; P:GO:0048865; P:GO:0048149; P:GO:0046845; P:GO:0007438; P:GO:0046673; P:GO:0043066; C:GO:0016021; P:GO:00…	P:epithelial cell proliferation involved in Malpighian tubule morphogenesis; P:epidermal growth factor receptor signaling pathway; P:positive regulation of cell proliferation; F:epidermal growth factor receptor binding; P:salivary gland boundary specification; P:imaginal disc-derived wing morphogenesis; C:Golgi apparatus; P:border follicle cell migration; P:positive regulation of epidermal growth…	no GO terms
TRINITY_GG_12099_c1_g1_i1	Lko057S003481	1	LOD2	RE41765p [Drosophila melanogaster]	2002	gi|259089578|gb|ACV91645.1|RE41765p [Drosophila melanogaster]	ACV91645	5.24e-62	76	206.453	200	152	P:GO:0070507; C:GO:0005737; P:GO:0046330; P:GO:0010506; P:GO:0035071; C:GO:0042995; F:GO:0043027	P:regulation of microtubule cytoskeleton organization; C:cytoplasm; P:positive regulation of JNK cascade; P:regulation of autophagy; P:salivary gland cell autophagic cell death; C:cell projection; F:cysteine-type endopeptidase inhibitor activity involved in apoptotic process	no GO terms
TRINITY_GG_12100_c0_g1_i1	Lko057S003481	1	LOD2	RNA pseudouridylate synthase domain-containing protein 3 [Zootermopsis nevadensis]	1457	gi|646710683|gb|KDR16129.1|RNA pseudouridylate synthase domain-containing protein 3 [Zootermopsis nevadensis]	KDR16129	1.21e-75	58.642	249.98	324	190	P:GO:0001522; F:GO:0003723; P:GO:0009451; C:GO:0016020; C:GO:0016021; F:GO:0009982	P:pseudouridine synthesis; F:RNA binding; P:RNA modification; C:membrane; C:integral component of membrane; F:pseudouridine synthase activity	P:GO:0001522; F:GO:0003723; P:GO:0009451; F:GO:0009982
TRINITY_GG_12103_c2_g1_i1	Lko057S003481	1	LOD2	spaghetti-squash activator	1688	gi|19921930|ref|NP_610514.1|spaghetti-squash activator, isoform B [Drosophila melanogaster] gi|16768110|gb|AAL28274.1| GH17420p [Drosophila melanogaster] gi|23240354|gb|AAF58906.3| spaghetti-squash activator, isoform B [Drosophila melanogaster]	NP_610514, AAL28274, AAF58906	8.57e-67	66.9231	224.557	260	174	P:GO:0008360; P:GO:0007498; P:GO:0045214; P:GO:0046777; F:GO:0004683; C:GO:0005875; F:GO:0004687; C:GO:0030018; F:GO:0008307; P:GO:0010906; P:GO:0006914; P:GO:0071689; P:GO:0032008	P:regulation of cell shape; P:mesoderm development; P:sarcomere organization; P:protein autophosphorylation; F:calmodulin-dependent protein kinase activity; C:microtubule associated complex; F:myosin light chain kinase activity; C:Z disc; F:structural constituent of muscle; P:regulation of glucose metabolic process; P:autophagy; P:muscle thin filament assembly; P:positive regulation of TOR signal…	F:GO:0005524; F:GO:0004672; P:GO:0006468
TRINITY_GG_12104_c0_g1_i1	Lko057S003481	1	LOD2	uncharacterized protein Dmel_CG32238 [Drosophila melanogaster]	2123	gi|24657931|ref|NP_729025.1|uncharacterized protein Dmel_CG32238 [Drosophila melanogaster] gi|7292526|gb|AAF47928.1| uncharacterized protein Dmel_CG32238 [Drosophila melanogaster] gi|108383566|gb|ABF85744.1| IP12417p [Drosophila melanogaster]	NP_729025, AAF47928, ABF85744	0	88.2212	689.878	416	367	P:GO:0018095; P:GO:0007275; P:GO:0030154	P:protein polyglutamylation; P:multicellular organism development; P:cell differentiation	P:GO:0006464
TRINITY_GG_12201_c0_g1_i1	Lko057S003534	1	LOD2	CG4069 [Drosophila melanogaster]	1960	gi|21355333|ref|NP_648590.1|CG4069 [Drosophila melanogaster] gi|7294558|gb|AAF49898.1| CG4069 [Drosophila melanogaster] gi|15292373|gb|AAK93455.1| LD47970p [Drosophila melanogaster]	NP_648590, AAF49898, AAK93455	3.76e-130	61.9149	394.045	470	291	C:GO:1990234; C:GO:0044451; P:GO:0016570; P:GO:0018205	C:transferase complex; C:nucleoplasm part; P:histone modification; P:peptidyl-lysine modification	F:GO:0005515
TRINITY_GG_12203_c0_g1_i1	Lko057S003534	1	LOD2	CG5830	716	gi|24664944|ref|NP_648825.1|CG5830, isoform A [Drosophila melanogaster] gi|23093405|gb|AAF49553.2| CG5830, isoform A [Drosophila melanogaster] gi|211938515|gb|ACJ13154.1| FI03279p [Drosophila melanogaster]	NP_648825, AAF49553, ACJ13154	1.97e-70	77.0588	219.55	170	131	P:GO:0030514; C:GO:0043231; P:GO:0006470; P:GO:0016043; C:GO:0012505; P:GO:0007474; F:GO:0008420; P:GO:0044763; C:GO:0044446; C:GO:0005886	P:negative regulation of BMP signaling pathway; C:intracellular membrane-bounded organelle; P:protein dephosphorylation; P:cellular component organization; C:endomembrane system; P:imaginal disc-derived wing vein specification; F:CTD phosphatase activity; P:single-organism cellular process; C:intracellular organelle part; C:plasma membrane	no GO terms
TRINITY_GG_12202_c0_g1_i1	Lko057S003534	1	LOD2	golgi complex-localized glycoprotein 1	5111	gi|28574778|ref|NP_788563.1|golgi complex-localized glycoprotein 1, isoform A [Drosophila melanogaster] gi|28380623|gb|AAF51732.2| golgi complex-localized glycoprotein 1, isoform A [Drosophila melanogaster] gi|33636627|gb|AAQ23611.1| LD19434p [Drosophila melanogaster]	NP_788563, AAF51732, AAQ23611	0	64.8926	956.822	1071	695	C:GO:0016021; C:GO:0000139; C:GO:0000138; C:GO:0000137; C:GO:0005797	C:integral component of membrane; C:Golgi membrane; C:Golgi trans cisterna; C:Golgi cis cisterna; C:Golgi medial cisterna	C:GO:0016020; C:GO:0000139
TRINITY_GG_12199_c0_g1_i1	Lko057S003534	1	LOD2	hexokinase A	1756	gi|24640843|ref|NP_727350.1|hexokinase A, isoform B [Drosophila melanogaster] gi|442615691|ref|NP_001259384.1| hexokinase A, isoform C [Drosophila melanogaster] gi|10765435|gb|AAG23046.1|AF257522_1 hexokinase-A [Drosophila melanogaster] gi|10765437|gb|AAG23047.1|AF257523_1 hexokinase-A [Drosophila melanogaster] gi|10765439|gb|AAG23048.1|AF257524_1 hexokinase-A [Drosophila melanogaster] gi|1076544…	NP_727350, NP_001259384, AAG23046, AAG23047, AAG23048, AAG23049, AAG23050, AAG23051, AAG23052, AAG23053, AAG23054, AAG23055, AAG23056, AAG23057, AAG23058, AAG23059, AAG23060, AAG23061, AAG23062, AAG23063, AAN09253, AGB95227	5.02e-80	54.1284	259.996	436	236	P:GO:0044281; P:GO:0065007; P:GO:0044763; P:GO:0044723	P:small molecule metabolic process; P:biological regulation; P:single-organism cellular process; P:single-organism carbohydrate metabolic process	F:GO:0005536; F:GO:0005524; P:GO:0005975; P:GO:0001678; F:GO:0004396; F:GO:0016773; P:GO:0046835
TRINITY_GG_12198_c0_g1_i1	Lko057S003534	1	LOD2	mirror [Drosophila melanogaster]	438	gi|2071997|gb|AAB53640.1|mirror [Drosophila melanogaster] gi|3243091|gb|AAC23943.1| homeoprotein Sail [Drosophila melanogaster]	AAB53640, AAC23943	4.93e-57	86.1789	188.348	123	106	P:GO:0045926; P:GO:0042659; P:GO:0042693; P:GO:0048735; P:GO:0090098; F:GO:0043565; P:GO:0007474; P:GO:0045664; P:GO:0045944; P:GO:0060323; P:GO:0009954; P:GO:0048813; P:GO:0000122; C:GO:0005667; F:GO:0001077; P:GO:0001700; P:GO:0072002; F:GO:0003705; C:GO:0005829; P:GO:0034504; P:GO:0007480; P:GO:0035310; F:GO:0042803; P:GO:0007283; P:GO:0007383; P:GO:0007224; P:GO:0007422; P:GO:0046843; P:GO:00…	P:negative regulation of growth; P:regulation of cell fate specification; P:muscle cell fate commitment; P:haltere morphogenesis; P:positive regulation of decapentaplegic signaling pathway; F:sequence-specific DNA binding; P:imaginal disc-derived wing vein specification; P:regulation of neuron differentiation; P:positive regulation of transcription from RNA polymerase II promoter; P:head morphoge…	no IPS match
TRINITY_GG_12361_c0_g1_i1	Lko057S003635	1	LOD2	AT30379p [Drosophila melanogaster]	1192	gi|324096446|gb|ADY17752.1|AT30379p [Drosophila melanogaster]	ADY17752	2.69e-06	54.4379	48.9062	169	92	P:GO:0035046; P:GO:0007143; P:GO:0007052; P:GO:0007097; C:GO:0000922; P:GO:0008104; P:GO:0007344; P:GO:0007026; P:GO:0007279; P:GO:0007067; P:GO:0000226; C:GO:0000235; C:GO:0005875; F:GO:0008017; C:GO:0000242; C:GO:0005876; C:GO:0005813; F:GO:0005515	P:pronuclear migration; P:female meiotic division; P:mitotic spindle organization; P:nuclear migration; C:spindle pole; P:protein localization; P:pronuclear fusion; P:negative regulation of microtubule depolymerization; P:pole cell formation; P:mitotic nuclear division; P:microtubule cytoskeleton organization; C:astral microtubule; C:microtubule associated complex; F:microtubule binding; C:perice…	no GO terms
TRINITY_GG_12360_c2_g1_i1	Lko057S003635	1	LOD2	IP03330p [Drosophila melanogaster]	870	gi|108743667|gb|ABG02142.1|IP03330p [Drosophila melanogaster]	ABG02142	6.97e-102	64.5768	304.679	319	206	P:GO:0007616; P:GO:0007615; P:GO:0035152; P:GO:0007465; P:GO:0016043; P:GO:0008355; P:GO:0042332; P:GO:0007156; P:GO:0048149; C:GO:0044459	P:long-term memory; P:anesthesia-resistant memory; P:regulation of tube architecture, open tracheal system; P:R7 cell fate commitment; P:cellular component organization; P:olfactory learning; P:gravitaxis; P:homophilic cell adhesion via plasma membrane adhesion molecules; P:behavioral response to ethanol; C:plasma membrane part	F:GO:0005515
TRINITY_GG_12360_c6_g1_i1	Lko057S003635	1	LOD2	IP03437p	279	gi|92109994|gb|ABE73321.1|IP03437p, partial [Drosophila melanogaster]	ABE73321	7.14e-40	85.5556	138.272	90	77	P:GO:0007616; C:GO:0005634; P:GO:0007615; P:GO:0007465; P:GO:0008355; P:GO:0042332; P:GO:0007156; P:GO:0048149; C:GO:0019897	P:long-term memory; C:nucleus; P:anesthesia-resistant memory; P:R7 cell fate commitment; P:olfactory learning; P:gravitaxis; P:homophilic cell adhesion via plasma membrane adhesion molecules; P:behavioral response to ethanol; C:extrinsic component of plasma membrane	no GO terms
TRINITY_GG_13071_c0_g1_i1;TRINITY_GG_13071_c4_g1_i1;TRINITY_GG_13071_c5_g1_i1	Lko057S004098	1	LOD2	cadherin 87A [Drosophila melanogaster]	1191	gi|45551880|ref|NP_731649.2|cadherin 87A [Drosophila melanogaster] gi|47117922|sp|Q9VGG5.4|CAD87_DROME RecName: Full=Cadherin-87A; Flags: Precursor gi|45446460|gb|AAF54717.4| cadherin 87A [Drosophila melanogaster]	NP_731649, Q9VGG5, AAF54717	2.59e-41	70.0637	156.762	157	110	P:GO:0045926;F:GO:0050839;P:GO:0007476;P:GO:0007411;P:GO:0051093;C:GO:0043005;P:GO:0048814;C:GO:0005887;P:GO:0048522;F:GO:0005509;P:GO:0051241;P:GO:0016339;P:GO:0007165;P:GO:0007389;P:GO:0042067;P:GO:0048646;P:GO:1902667;P:GO:0046620;P:GO:0048523;F:GO:0004871;P:GO:0009966;P:GO:0007424;P:GO:0030855;P:GO:0030516;C:GO:0005911;P:GO:0042051;P:GO:0048675;P:GO:0044331;P:GO:0007010;P:GO:0008361;P:GO:0007…	P:negativeregulationofgrowth;F:celladhesionmoleculebinding;P:imaginaldisc-derivedwingmorphogenesis;P:axonguidance;P:negativeregulationofdevelopmentalprocess;C:neuronprojection;P:regulationofdendritemorphogenesis;C:integralcomponentofplasmamembrane;P:positiveregulationofcellularprocess;F:calciumionbinding;P:negativeregulationofmulticellularorganismalprocess;P:calcium-dependentcell-celladhesionviap…	F:GO:0005509;C:GO:0016020;P:GO:0007156;noGOterms
TRINITY_GG_13070_c0_g1_i1;TRINITY_GG_13070_c0_g1_i2;TRINITY_GG_13070_c0_g1_i3	Lko057S004098	1	LOD2	CG9231	2017	gi|21357525|ref|NP_649128.1|CG9231, isoform A [Drosophila melanogaster] gi|665410596|ref|NP_001287120.1| CG9231, isoform B [Drosophila melanogaster] gi|74871274|sp|Q9VW12.1|U389_DROME RecName: Full=UPF0389 protein CG9231 gi|7293775|gb|AAF49143.1| CG9231, isoform A [Drosophila melanogaster] gi|20151611|gb|AAM11165.1| LD30488p [Drosophila melanogaster] gi|599131341|gb|AHN58145.1| CG9231, isoform B …	NP_649128, NP_001287120, Q9VW12, AAF49143, AAM11165, AHN58145	8.64e-31	76.1364	117.857	88	67	P:GO:0019233	P:sensoryperceptionofpain	noGOterms
TRINITY_GG_13072_c0_g1_i1	Lko057S004098	1	LOD2	histone H2A variant	2609	gi|17738227|ref|NP_524519.1|histone H2A variant, isoform A [Drosophila melanogaster] gi|442621298|ref|NP_001262997.1| histone H2A variant, isoform B [Drosophila melanogaster] gi|121989|sp|P08985.2|H2AV_DROME RecName: Full=Histone H2A.v; AltName: Full=H2A.F/Z; Short=H2A.Z gi|8040|emb|CAA30370.1| unnamed protein product [Drosophila melanogaster] gi|295749|emb|CAA33555.1| histone H2A [Drosophila mel…	NP_524519, NP_001262997, P08985, CAA30370, CAA33555, AAF56631, AAM50770, CAL26295, CAL26297, CAL26299, CAL26300, CAL26302, CAR93360, CAR93361, CAR93362, CAR93363, CAR93364, CAR93365, CAR93366, CAR93368, CAR93369, CAR93370, CAR93371, AGB96377	3.35e-57	100	193.356	97	97	C:GO:0035861; P:GO:0036098; C:GO:0000788; P:GO:0006325; P:GO:0006974; C:GO:0005701; C:GO:0005811; F:GO:0003677; F:GO:0046982; P:GO:0051298; P:GO:0071168; P:GO:0035019; P:GO:0019233	C:site of double-strand break; P:male germ-line stem cell population maintenance; C:nuclear nucleosome; P:chromatin organization; P:cellular response to DNA damage stimulus; C:polytene chromosome chromocenter; C:lipid particle; F:DNA binding; F:protein heterodimerization activity; P:centrosome duplication; P:protein localization to chromatin; P:somatic stem cell population maintenance; P:sensory …	C:GO:0005634; F:GO:0003677; F:GO:0046982; C:GO:0000786
TRINITY_GG_13069_c0_g1_i1	Lko057S004098	1	LOD2	karyopherin alpha1 [Drosophila melanogaster]	4058	gi|17737655|ref|NP_524167.1|karyopherin alpha1 [Drosophila melanogaster] gi|3309273|gb|AAC26055.1| karyopherin alpha 1, partial [Drosophila melanogaster] gi|7293740|gb|AAF49109.1| karyopherin alpha1 [Drosophila melanogaster] gi|237513016|gb|ACQ99833.1| FI03727p [Drosophila melanogaster]	NP_524167, AAC26055, AAF49109, ACQ99833	0	77.0115	702.205	522	402	P:GO:0007095; P:GO:0007291; P:GO:0007301; F:GO:0005112; P:GO:0009411; P:GO:0042332; C:GO:0005875; C:GO:0005811; C:GO:0005634; P:GO:0051533; P:GO:0010906; C:GO:0005737; P:GO:0051298; P:GO:0048542; P:GO:0006607; F:GO:0017022; P:GO:0019233	P:mitotic G2 DNA damage checkpoint; P:sperm individualization; P:female germline ring canal formation; F:Notch binding; P:response to UV; P:gravitaxis; C:microtubule associated complex; C:lipid particle; C:nucleus; P:positive regulation of NFAT protein import into nucleus; P:regulation of glucose metabolic process; C:cytoplasm; P:centrosome duplication; P:lymph gland development; P:NLS-bearing pr…	C:GO:0005634; F:GO:0005515; C:GO:0005737; P:GO:0006606; F:GO:0008565; F:GO:0005488
TRINITY_GG_13070_c1_g1_i1	Lko057S004098	1	LOD2	LD24482p [Drosophila melanogaster]	3601	gi|28557645|gb|AAO45228.1|LD24482p [Drosophila melanogaster]	AAO45228	2.12e-24	39.0374	111.309	748	292	P:GO:0060255; P:GO:0044260; P:GO:0050794; P:GO:0048731; P:GO:0044238	P:regulation of macromolecule metabolic process; P:cellular macromolecule metabolic process; P:regulation of cellular process; P:system development; P:primary metabolic process	F:GO:0003676; F:GO:0003677; F:GO:0046983
TRINITY_GG_13071_c1_g1_i1;TRINITY_GG_13071_c2_g1_i1	Lko057S004098	1	LOD2	SD07147p	1651	gi|21711815|gb|AAM75098.1|SD07147p, partial [Drosophila melanogaster]	AAM75098	1.43e-106	69.0104	350.517	384	265	P:GO:0035220;P:GO:0035120;P:GO:0048812;P:GO:0048638;P:GO:0048584;C:GO:0005887;P:GO:0048522;P:GO:0050770;F:GO:0005509;P:GO:0035114;P:GO:0065008;P:GO:0016339;P:GO:0007560;P:GO:0007165;C:GO:0098590;P:GO:0007389;P:GO:0042067;P:GO:0048646;P:GO:0048667;P:GO:0048523;F:GO:0004871;P:GO:0009966;P:GO:0030855;F:GO:0005515;P:GO:0048477;P:GO:0044331;P:GO:0007424	P:wingdiscdevelopment;P:post-embryonicappendagemorphogenesis;P:neuronprojectionmorphogenesis;P:regulationofdevelopmentalgrowth;P:positiveregulationofresponsetostimulus;C:integralcomponentofplasmamembrane;P:positiveregulationofcellularprocess;P:regulationofaxonogenesis;F:calciumionbinding;P:imaginaldisc-derivedappendagemorphogenesis;P:regulationofbiologicalquality;P:calcium-dependentcell-celladhes…	F:GO:0005509;C:GO:0016020;P:GO:0007155;P:GO:0007156;C:GO:0005886
TRINITY_GG_13072_c1_g1_i1	Lko057S004098	1	LOD2	secreted protein, acidic, cysteine-rich	2713	gi|24650420|ref|NP_651509.2|secreted protein, acidic, cysteine-rich, isoform A [Drosophila melanogaster] gi|442621301|ref|NP_001262998.1| secreted protein, acidic, cysteine-rich, isoform B [Drosophila melanogaster] gi|4499900|emb|CAB39319.1| BM-40 [Drosophila melanogaster] gi|10726793|gb|AAF56632.2| secreted protein, acidic, cysteine-rich, isoform A [Drosophila melanogaster] gi|341823710|gb|AEK87…	NP_651509, NP_001262998, CAB39319, AAF56632, AEK87153, AGB96378	4.7e-84	75.9804	273.092	204	155	P:GO:0030536; C:GO:0005615; P:GO:0007504; P:GO:0007443; P:GO:0007498; P:GO:0060438; P:GO:0070831; P:GO:0007155; P:GO:0070278; C:GO:0005578; P:GO:0061327	P:larval feeding behavior; C:extracellular space; P:larval fat body development; P:Malpighian tubule morphogenesis; P:mesoderm development; P:trachea development; P:basement membrane assembly; P:cell adhesion; P:extracellular matrix constituent secretion; C:proteinaceous extracellular matrix; P:anterior Malpighian tubule development	C:GO:0005615; P:GO:0007165; F:GO:0005509; C:GO:0005578
TRINITY_GG_13073_c0_g1_i1	Lko057S004098	1	LOD2	uncharacterized protein Dmel_CG14103	1737	gi|21357389|ref|NP_649149.1|uncharacterized protein Dmel_CG14103, isoform A [Drosophila melanogaster] gi|442633462|ref|NP_001262065.1| uncharacterized protein Dmel_CG14103, isoform B [Drosophila melanogaster] gi|16769436|gb|AAL28937.1| LD31235p [Drosophila melanogaster] gi|23093085|gb|AAF49112.2| uncharacterized protein Dmel_CG14103, isoform A [Drosophila melanogaster] gi|440216024|gb|AGB94758.1|…	NP_649149, NP_001262065, AAL28937, AAF49112, AGB94758	4.25e-25	49.5495	106.686	222	110	F:GO:0003677; P:GO:0008150; C:GO:0005575; F:GO:0003674	F:DNA binding; P:biological_process; C:cellular_component; F:molecular_function	no GO terms
TRINITY_GG_13936_c2_g1_i1	Lko057S004777	1	LOD2	14-3-3zeta	3190	gi|24652322|ref|NP_476885.2|14-3-3zeta, isoform D [Drosophila melanogaster] gi|24652324|ref|NP_724884.1| 14-3-3zeta, isoform E [Drosophila melanogaster] gi|62471695|ref|NP_001014515.1| 14-3-3zeta, isoform J [Drosophila melanogaster] gi|442623114|ref|NP_001260845.1| 14-3-3zeta, isoform K [Drosophila melanogaster] gi|442623116|ref|NP_001260846.1| 14-3-3zeta, isoform L [Drosophila melanogaster] gi|1…	NP_476885, NP_724884, NP_001014515, NP_001260845, NP_001260846, P29310, AAA28324, CAA73152, AAM71060, AAM71061, AAX52715, ACO72859, ACR44245, AGB93378, AGB93379	3.29e-149	96.9697	445.277	231	224	P:GO:0007095; P:GO:0045927; P:GO:0007294; P:GO:0008340; P:GO:0007059; P:GO:0007411; P:GO:0008103; P:GO:0046579; P:GO:0009411; C:GO:0005694; F:GO:0008426; C:GO:0005875; C:GO:0005654; P:GO:0045448; C:GO:0045172; F:GO:0046982; F:GO:0050815; P:GO:0040040; F:GO:0019904; F:GO:0042803; P:GO:0007280; P:GO:0007088; P:GO:0008355; P:GO:0006457; C:GO:0005886; C:GO:0005813; C:GO:0031965; P:GO:0010906; C:GO:00…	P:mitotic G2 DNA damage checkpoint; P:positive regulation of growth; P:germarium-derived oocyte fate determination; P:determination of adult lifespan; P:chromosome segregation; P:axon guidance; P:oocyte microtubule cytoskeleton polarization; P:positive regulation of Ras protein signal transduction; P:response to UV; C:chromosome; F:protein kinase C inhibitor activity; C:microtubule associated com…	F:GO:0019904
TRINITY_GG_13932_c0_g1_i1;TRINITY_GG_13932_c0_g1_i2	Lko057S004777	1	LOD2	Argonaute-1	6322	gi|24653501|ref|NP_725341.1|Argonaute-1, isoform A [Drosophila melanogaster] gi|24653503|ref|NP_725342.1| Argonaute-1, isoform C [Drosophila melanogaster] gi|386767924|ref|NP_001246314.1| Argonaute-1, isoform D [Drosophila melanogaster] gi|7303251|gb|AAF58313.1| Argonaute-1, isoform C [Drosophila melanogaster] gi|7303252|gb|AAF58314.1| Argonaute-1, isoform A [Drosophila melanogaster] gi|78214268|…	NP_725341, NP_725342, NP_001246314, AAF58313, AAF58314, ABB36449, ADV19036, AFH08068	0	96.8531	1665.59	858	831	F:GO:0035198;P:GO:0046959;P:GO:0007294;P:GO:0035196;P:GO:0036099;P:GO:0007367;P:GO:0006342;P:GO:0006402;C:GO:0005634;P:GO:0007416;C:GO:0048471;C:GO:0030529;P:GO:0030727;P:GO:0030422;P:GO:0035279;P:GO:0090328;F:GO:0019899;P:GO:0030423	F:miRNAbinding;P:habituation;P:germarium-derivedoocytefatedetermination;P:productionofmiRNAsinvolvedingenesilencingbymiRNA;P:femalegerm-linestemcellpopulationmaintenance;P:segmentpolaritydetermination;P:chromatinsilencing;P:mRNAcatabolicprocess;C:nucleus;P:synapseassembly;C:perinuclearregionofcytoplasm;C:intracellularribonucleoproteincomplex;P:germarium-derivedfemalegerm-linecystformation;P:produ…	F:GO:0003676;F:GO:0005515
TRINITY_GG_13928_c1_g1_i1;TRINITY_GG_13928_c1_g1_i2	Lko057S004777	1	LOD2	CG3376	2592	gi|665403419|ref|NP_001286833.1|CG3376, isoform D [Drosophila melanogaster] gi|599127418|gb|AHN56628.1| CG3376, isoform D [Drosophila melanogaster]	NP_001286833, AHN56628	0	83.2479	882.093	585	487	F:GO:0004767;P:GO:0006685	F:sphingomyelinphosphodiesteraseactivity;P:sphingomyelincatabolicprocess	F:GO:0004767;P:GO:0006685;F:GO:0016787
TRINITY_GG_13935_c0_g1_i1	Lko057S004777	1	LOD2	CG4360	530	gi|161078433|ref|NP_001097844.1|CG4360, isoform B [Drosophila melanogaster] gi|85857530|gb|ABC86300.1| LD04512p [Drosophila melanogaster] gi|158030312|gb|ABW08709.1| CG4360, isoform B [Drosophila melanogaster]	NP_001097844, ABC86300, ABW08709	5.98e-06	50.9434	46.2098	53	27	P:GO:0008150; F:GO:0008270; P:GO:0046688; P:GO:1990170; F:GO:0000976; P:GO:0006875; P:GO:0045944; P:GO:0000122; F:GO:0003676; F:GO:0003677; C:GO:0005634; C:GO:0005876; F:GO:0003700; P:GO:0008407; C:GO:0005737; F:GO:0046872; P:GO:0055069; P:GO:0034599; P:GO:0010038	P:biological_process; F:zinc ion binding; P:response to copper ion; P:stress response to cadmium ion; F:transcription regulatory region sequence-specific DNA binding; P:cellular metal ion homeostasis; P:positive regulation of transcription from RNA polymerase II promoter; P:negative regulation of transcription from RNA polymerase II promoter; F:nucleic acid binding; F:DNA binding; C:nucleus; C:sp…	F:GO:0003676
TRINITY_GG_13929_c0_g1_i1	Lko057S004777	1	LOD2	IP14542p [Drosophila melanogaster]	1176	gi|66771693|gb|AAY55158.1|IP14542p [Drosophila melanogaster] gi|66771705|gb|AAY55164.1| IP14642p [Drosophila melanogaster]	AAY55158, AAY55164	3.77e-10	62.069	61.6178	58	36	P:GO:0007390; P:GO:0060086; F:GO:0043565; P:GO:0007398; P:GO:0045944; P:GO:0007605; C:GO:0005700; P:GO:0007427; P:GO:0045892; P:GO:0031936; F:GO:0003705; P:GO:0043153; P:GO:0010114; P:GO:0035271; F:GO:0043035; C:GO:0000785; P:GO:0007525; P:GO:0046427; P:GO:0007517; C:GO:0005634; P:GO:0001752; F:GO:0005515; P:GO:0007417; P:GO:0010906; P:GO:0006909	P:germ-band shortening; P:circadian temperature homeostasis; F:sequence-specific DNA binding; P:ectoderm development; P:positive regulation of transcription from RNA polymerase II promoter; P:sensory perception of sound; C:polytene chromosome; P:epithelial cell migration, open tracheal system; P:negative regulation of transcription, DNA-templated; P:negative regulation of chromatin silencing; F:t…	no IPS match
TRINITY_GG_13932_c1_g1_i1	Lko057S004777	1	LOD2	mitochondrial ribosomal protein L53 [Drosophila melanogaster]	799	gi|24653506|ref|NP_725343.1|mitochondrial ribosomal protein L53 [Drosophila melanogaster] gi|21627207|gb|AAM68563.1| mitochondrial ribosomal protein L53 [Drosophila melanogaster] gi|224809689|gb|ACN63496.1| RE16138p [Drosophila melanogaster]	NP_725343, AAM68563, ACN63496	9.48e-35	66.129	123.25	124	82	P:GO:0035167; F:GO:0003735; P:GO:0032543; C:GO:0005762	P:larval lymph gland hemopoiesis; F:structural constituent of ribosome; P:mitochondrial translation; C:mitochondrial large ribosomal subunit	no GO terms
TRINITY_GG_13930_c0_g1_i1	Lko057S004777	1	LOD2	phosphofructokinase	4225	gi|24652337|ref|NP_724890.1|phosphofructokinase, isoform B [Drosophila melanogaster] gi|73620969|sp|P52034.2|PFKA_DROME RecName: Full=ATP-dependent 6-phosphofructokinase; Short=ATP-PFK; Short=Phosphofructokinase; AltName: Full=Phosphohexokinase gi|7303793|gb|AAF58841.1| phosphofructokinase, isoform B [Drosophila melanogaster] gi|375065898|gb|AFA28430.1| FI18643p1 [Drosophila melanogaster]	NP_724890, P52034, AAF58841, AFA28430	0	83.2258	1109.36	775	645	F:GO:0005524; C:GO:0005945; P:GO:0006096; P:GO:0006002; P:GO:0007520; P:GO:0007525; F:GO:0003872; P:GO:0009744	F:ATP binding; C:6-phosphofructokinase complex; P:glycolytic process; P:fructose 6-phosphate metabolic process; P:myoblast fusion; P:somatic muscle development; F:6-phosphofructokinase activity; P:response to sucrose	F:GO:0005524; C:GO:0005737; P:GO:0006096; P:GO:0006002; F:GO:0003872
TRINITY_GG_13928_c0_g1_i1	Lko057S004777	1	LOD2	PREDICTED: F-box only protein 5-A-like [Microplitis demolitor]	2040	gi|665794214|ref|XP_008544794.1|PREDICTED: F-box only protein 5-A-like [Microplitis demolitor]	XP_008544794	2.46e-21	52.6786	106.686	224	118			F:GO:0005515
TRINITY_GG_13935_c16_g1_i1	Lko057S004777	1	LOD2	PREDICTED: transcription factor HIVEP3-like [Apis cerana]	232	gi|1035606545|ref|XP_016910813.1|PREDICTED: transcription factor HIVEP3-like [Apis cerana]	XP_016910813	0.000436	72.2222	44.669	36	26			no GO terms
TRINITY_GG_13935_c3_g1_i1	Lko057S004777	1	LOD2	PREDICTED: transcription factor HIVEP3 isoform X1 [Linepithema humile]	357	gi|815822774|ref|XP_012232682.1|PREDICTED: transcription factor HIVEP3 isoform X1 [Linepithema humile]	XP_012232682	5.04e-07	48.8189	54.6842	127	62			no GO terms
TRINITY_GG_13933_c1_g1_i1;TRINITY_GG_13933_c1_g1_i2;TRINITY_GG_13933_c1_g1_i3;TRINITY_GG_13933_c1_g1_i4	Lko057S004777	1	LOD2	regulatory particle non-ATPase 13	1629	gi|19922206|ref|NP_610917.1|regulatory particle non-ATPase 13, isoform A [Drosophila melanogaster] gi|24653513|ref|NP_725346.1| regulatory particle non-ATPase 13, isoform B [Drosophila melanogaster] gi|221330241|ref|NP_001137664.1| regulatory particle non-ATPase 13, isoform F [Drosophila melanogaster] gi|122114435|sp|Q7K2G1.1|ADRM1_DROME RecName: Full=Proteasomal ubiquitin receptor ADRM1 homolog;…	NP_610917, NP_725346, NP_001137664, Q7K2G1, AAF58312, AAG22269, AAL28575, ACL83118	2.82e-69	85.5346	228.794	159	136	F:GO:0061133;C:GO:0005634;P:GO:0043161;F:GO:0043130;C:GO:0005737;P:GO:0046331;C:GO:0008541;P:GO:0043248	F:endopeptidaseactivatoractivity;C:nucleus;P:proteasome-mediatedubiquitin-dependentproteincatabolicprocess;F:ubiquitinbinding;C:cytoplasm;P:lateralinhibition;C:proteasomeregulatoryparticle,lidsubcomplex;P:proteasomeassembly	C:GO:0005634;C:GO:0005737
TRINITY_GG_13936_c5_g1_i1	Lko057S004777	1	LOD2	RH61958p [Drosophila melanogaster]	232	gi|25013056|gb|AAN71617.1|RH61958p [Drosophila melanogaster]	AAN71617	1.27e-48	97.4026	154.451	77	75	P:GO:0007095; P:GO:0045927; P:GO:0007294; P:GO:0008340; P:GO:0007059; P:GO:0007411; P:GO:0008103; P:GO:0046579; P:GO:0009411; C:GO:0005694; F:GO:0008426; C:GO:0005875; C:GO:0005654; P:GO:0045448; C:GO:0045172; F:GO:0046982; F:GO:0050815; P:GO:0040040; F:GO:0019904; F:GO:0042803; P:GO:0007280; P:GO:0007088; P:GO:0008355; P:GO:0006457; C:GO:0005886; C:GO:0005813; C:GO:0031965; P:GO:0010906; C:GO:00…	P:mitotic G2 DNA damage checkpoint; P:positive regulation of growth; P:germarium-derived oocyte fate determination; P:determination of adult lifespan; P:chromosome segregation; P:axon guidance; P:oocyte microtubule cytoskeleton polarization; P:positive regulation of Ras protein signal transduction; P:response to UV; C:chromosome; F:protein kinase C inhibitor activity; C:microtubule associated com…	no GO terms
TRINITY_GG_13936_c1_g1_i1	Lko057S004777	1	LOD2	ribosomal protein LP0-like [Drosophila melanogaster]	1061	gi|19921958|ref|NP_610554.1|ribosomal protein LP0-like [Drosophila melanogaster] gi|7303797|gb|AAF58844.1| ribosomal protein LP0-like [Drosophila melanogaster] gi|16769692|gb|AAL29065.1| LD47064p [Drosophila melanogaster]	NP_610554, AAF58844, AAL29065	1.71e-88	76.3889	267.7	216	165	F:GO:0003735; P:GO:0002181; P:GO:0042254; C:GO:0022625	F:structural constituent of ribosome; P:cytoplasmic translation; P:ribosome biogenesis; C:cytosolic large ribosomal subunit	P:GO:0042254; P:GO:0000027; C:GO:0005622
TRINITY_GG_13936_c12_g1_i1;TRINITY_GG_13936_c9_g1_i1	Lko057S004777	1	LOD2	terribly reduced optic lobes	553	gi|665389373|ref|NP_001245491.2|terribly reduced optic lobes, isoform AU [Drosophila melanogaster] gi|599137489|gb|AFH07205.2| terribly reduced optic lobes, isoform AU [Drosophila melanogaster]	NP_001245491, AFH07205	1.88e-06	55.0459	48.1358	109	60	C:GO:0005811;P:GO:2001262;C:GO:0005604;P:GO:0008045;P:GO:0045199;C:GO:0005829;P:GO:0072347;P:GO:0007415;C:GO:0005654;P:GO:0040003;F:GO:0004872;P:GO:0006898;P:GO:0030100;C:GO:0016324;P:GO:0048082	C:lipidparticle;P:positiveregulationofsemaphorin-plexinsignalingpathway;C:basementmembrane;P:motorneuronaxonguidance;P:maintenanceofepithelialcellapical/basalpolarity;C:cytosol;P:responsetoanesthetic;P:defasciculationofmotorneuronaxon;C:nucleoplasm;P:chitin-basedcuticledevelopment;F:receptoractivity;P:receptor-mediatedendocytosis;P:regulationofendocytosis;C:apicalplasmamembrane;P:regulationofadul…	F:GO:0005515
TRINITY_GG_13935_c15_g1_i1;TRINITY_GG_13935_c18_g1_i1;TRINITY_GG_13935_c6_g1_i1	Lko057S004777	1	LOD2	zinc finger protein [Drosophila melanogaster]	387	gi|845332|gb|AAA98814.1|zinc finger protein [Drosophila melanogaster]	AAA98814	2.65e-12	63.1579	63.1586	57	36	P:GO:0007391;P:GO:0008283;P:GO:0045705;P:GO:0007494;P:GO:0007179;P:GO:0007443;P:GO:0008355;P:GO:0008586;P:GO:0007398;F:GO:0001105;P:GO:0045944;F:GO:0001102;P:GO:0048813;P:GO:0000122;P:GO:0048100;C:GO:0005634;F:GO:0003705;P:GO:0048190;P:GO:0008285;P:GO:0007476;P:GO:0007611;F:GO:0003700;P:GO:0001745;F:GO:0008270;P:GO:0007422;F:GO:0003676;P:GO:0009416;P:GO:0009649;P:GO:0001751;F:GO:0003677	P:dorsalclosure;P:cellproliferation;P:negativeregulationofsalivaryglandboundaryspecification;P:midgutdevelopment;P:transforminggrowthfactorbetareceptorsignalingpathway;P:Malpighiantubulemorphogenesis;P:olfactorylearning;P:imaginaldisc-derivedwingveinmorphogenesis;P:ectodermdevelopment;F:RNApolymeraseIItranscriptioncoactivatoractivity;P:positiveregulationoftranscriptionfromRNApolymeraseIIpromoter;…	noGOterms;F:GO:0003676
TRINITY_GG_14839_c6_g1_i1	Lko057S005557	1	LOD2	AT04056p [Drosophila melanogaster]	3974	gi|51092252|gb|AAT94539.1|AT04056p [Drosophila melanogaster]	AAT94539	4.63e-168	63.7209	537.724	645	411	P:GO:0007616; P:GO:0046907; C:GO:0005794; P:GO:0008355; P:GO:0009306	P:long-term memory; P:intracellular transport; C:Golgi apparatus; P:olfactory learning; P:protein secretion	F:GO:0005515
TRINITY_GG_14837_c1_g1_i1	Lko057S005557	1	LOD2	CG7988 [Drosophila melanogaster]	946	gi|24647875|ref|NP_650691.1|CG7988 [Drosophila melanogaster] gi|31340434|sp|Q9VEB5.1|SRR1L_DROME RecName: Full=SRR1-like protein gi|7300353|gb|AAF55512.1| CG7988 [Drosophila melanogaster] gi|21430278|gb|AAM50817.1| LD36129p [Drosophila melanogaster]	NP_650691, Q9VEB5, AAF55512, AAM50817	5.6e-21	51.3369	91.2781	187	96	P:GO:0007623; C:GO:0005575; F:GO:0003674	P:circadian rhythm; C:cellular_component; F:molecular_function	no GO terms
TRINITY_GG_14835_c1_g1_i1	Lko057S005557	1	LOD2	craniofacial development protein 2-like [Parasteatoda tepidariorum]	210	gi|1009588194|ref|XP_015923357.1|craniofacial development protein 2-like [Parasteatoda tepidariorum]	XP_015923357	4.18e-12	68.9655	65.4698	58	40	P:GO:0090305; F:GO:0003964; F:GO:0004519; P:GO:0006278	P:nucleic acid phosphodiester bond hydrolysis; F:RNA-directed DNA polymerase activity; F:endonuclease activity; P:RNA-dependent DNA biosynthetic process	no IPS match
TRINITY_GG_14831_c0_g1_i1	Lko057S005557	1	LOD2	glyceraldehyde 3 phosphate dehydrogenase 2	1281	gi|18110149|ref|NP_542445.1|glyceraldehyde 3 phosphate dehydrogenase 2, isoform A [Drosophila melanogaster] gi|442616493|ref|NP_001259584.1| glyceraldehyde 3 phosphate dehydrogenase 2, isoform C [Drosophila melanogaster] gi|14286123|sp|P07487.2|G3P2_DROME RecName: Full=Glyceraldehyde-3-phosphate dehydrogenase 2; AltName: Full=Glyceraldehyde-3-phosphate dehydrogenase II; Short=GAPDH II gi|7293147|…	NP_542445, NP_001259584, P07487, AAF48531, AAM11293, ABH06741, ABH06742, ABH06743, ABH06744, ABH06745, ABH06747, ABH06748, ABH06749, ABH06750, ABH06751, ABH06752, ABH06753, ABH06754, ABH06755, ABH06756, AGB95426	3.22e-163	83.1832	463.381	333	277	C:GO:0005811; C:GO:0030018; F:GO:0050661; F:GO:0051287; P:GO:0006096; P:GO:0007520; P:GO:0055114; C:GO:0031430; P:GO:0006006; F:GO:0004365; P:GO:0007525; C:GO:0005875	C:lipid particle; C:Z disc; F:NADP binding; F:NAD binding; P:glycolytic process; P:myoblast fusion; P:oxidation-reduction process; C:M band; P:glucose metabolic process; F:glyceraldehyde-3-phosphate dehydrogenase (NAD+) (phosphorylating) activity; P:somatic muscle development; C:microtubule associated complex	F:GO:0050661; F:GO:0051287; P:GO:0055114; P:GO:0006006; F:GO:0016620
TRINITY_GG_14833_c0_g1_i1	Lko057S005557	1	LOD2	hypothetical protein RF55_15067 [Lasius niger]	234	gi|861615293|gb|KMQ86065.1|hypothetical protein RF55_15067 [Lasius niger]	KMQ86065	1.15e-07	59.0164	53.1434	61	36			no IPS match
TRINITY_GG_14839_c3_g1_i1	Lko057S005557	1	LOD2	hypothetical protein WH47_12454 [Habropoda laboriosa]	2124	gi|915661633|gb|KOC64152.1|hypothetical protein WH47_12454 [Habropoda laboriosa]	KOC64152	2.12e-23	49.1525	113.235	295	145			no GO terms
TRINITY_GG_14839_c3_g1_i2	Lko057S005557	1	LOD2	PREDICTED: coiled-coil domain-containing protein 157 [Chrysochloris asiatica]	2106	gi|586477519|ref|XP_006869299.1|PREDICTED: coiled-coil domain-containing protein 157 [Chrysochloris asiatica]	XP_006869299	9.48e-07	41.0423	61.2326	614	252
TRINITY_GG_14839_c0_g1_i1	Lko057S005557	1	LOD2	sarco/endoplasmic reticulum-type Ca-2+-ATPase [Drosophila melanogaster]	4465	gi|158416|gb|AAB00735.1|sarco/endoplasmic reticulum-type Ca-2+-ATPase [Drosophila melanogaster]	AAB00735	0	94.3227	1742.63	1004	947	P:GO:0060047; P:GO:0007274; F:GO:0000166; P:GO:0006635; P:GO:0048863; P:GO:0007629; P:GO:0030707; P:GO:0030001; P:GO:0030322; P:GO:0050896; P:GO:0035152; P:GO:0008610; P:GO:0051282; C:GO:0005783; P:GO:1901896; F:GO:0005388; C:GO:0005886; P:GO:0006874; C:GO:0005635; C:GO:0005811; F:GO:0005515; P:GO:0010906; F:GO:0046872; C:GO:0016021; P:GO:0036335; P:GO:0010884	P:heart contraction; P:neuromuscular synaptic transmission; F:nucleotide binding; P:fatty acid beta-oxidation; P:stem cell differentiation; P:flight behavior; P:ovarian follicle cell development; P:metal ion transport; P:stabilization of membrane potential; P:response to stimulus; P:regulation of tube architecture, open tracheal system; P:lipid biosynthetic process; P:regulation of sequestering o…	F:GO:0000166; P:GO:0006816; C:GO:0016021; F:GO:0005388
TRINITY_GG_14832_c14_g1_i1	Lko057S005557	1	LOD2	Uncharacterized protein APZ42_000410	354	gi|1022754875|gb|KZS02524.1|Uncharacterized protein APZ42_000410, partial [Daphnia magna]	KZS02524	4.98e-06	53.0864	49.6766	81	43			no IPS match
TRINITY_GG_14832_c4_g1_i1	Lko057S005557	1	LOD2	uncharacterized protein Dmel_CG12413 [Drosophila melanogaster]	2471	gi|28572034|ref|NP_651621.2|uncharacterized protein Dmel_CG12413 [Drosophila melanogaster] gi|28381483|gb|AAF56796.2| uncharacterized protein Dmel_CG12413 [Drosophila melanogaster] gi|544063542|gb|AGV77160.1| FI21480p1 [Drosophila melanogaster]	NP_651621, AAF56796, AGV77160	0	70.7317	715.301	697	493	F:GO:0003743; F:GO:0005515; F:GO:0003924; C:GO:0005739; P:GO:0032543; F:GO:0000049; P:GO:0006413; P:GO:0006414	F:translation initiation factor activity; F:protein binding; F:GTPase activity; C:mitochondrion; P:mitochondrial translation; F:tRNA binding; P:translational initiation; P:translational elongation	F:GO:0005525; F:GO:0003743; F:GO:0003924; P:GO:0006413; C:GO:0005622
TRINITY_GG_14837_c0_g1_i1	Lko057S005557	1	LOD2	uncharacterized protein Dmel_CG34117 [Drosophila melanogaster]	757	gi|116007982|ref|NP_001036690.1|uncharacterized protein Dmel_CG34117 [Drosophila melanogaster] gi|113194761|gb|ABI31150.1| uncharacterized protein Dmel_CG34117 [Drosophila melanogaster] gi|1049303405|gb|ANY27786.1| GEO13368p1, partial [Drosophila melanogaster]	NP_001036690, ABI31150, ANY27786	3.67e-29	75	106.686	96	72			no GO terms
TRINITY_GG_14835_c0_g1_i1	Lko057S005557	1	LOD2	uncharacterized protein LOC110381795 [Helicoverpa armigera]	642	gi|1199404631|ref|XP_021197873.1|uncharacterized protein LOC110381795 [Helicoverpa armigera]	XP_021197873	1.39e-19	55.6962	93.9745	158	88			no GO terms
TRINITY_GG_15828_c1_g1_i1	Lko057S006750	1	LOD2	CG4269	928	gi|665402827|ref|NP_001286729.1|CG4269, isoform B [Drosophila melanogaster] gi|599127297|gb|AHN56524.1| CG4269, isoform B [Drosophila melanogaster]	NP_001286729, AHN56524	6.39e-12	58.7302	62.003	63	37			no IPS match
TRINITY_GG_15827_c0_g1_i1	Lko057S006750	1	LOD2	CG5554	2887	gi|20130317|ref|NP_611838.1|CG5554, isoform A [Drosophila melanogaster] gi|7291650|gb|AAF47072.1| CG5554, isoform A [Drosophila melanogaster] gi|21429864|gb|AAM50610.1| GH07506p [Drosophila melanogaster]	NP_611838, AAF47072, AAM50610	6.17e-64	73.913	219.935	184	136	C:GO:0031967; P:GO:0050794; C:GO:0016021; C:GO:0005783; P:GO:0044699; P:GO:0009987	C:organelle envelope; P:regulation of cellular process; C:integral component of membrane; C:endoplasmic reticulum; P:single-organism process; P:cellular process	P:GO:0045454
TRINITY_GG_15828_c0_g1_i1;TRINITY_GG_15828_c0_g1_i2	Lko057S006750	1	LOD2	CG7420	1654	gi|442625191|ref|NP_001259871.1|CG7420, isoform B [Drosophila melanogaster] gi|440213131|gb|AGB92408.1| CG7420, isoform B [Drosophila melanogaster]	NP_001259871, AGB92408	1.57e-33	57.3034	132.494	178	102	P:GO:0060341;C:GO:0043229;P:GO:0044708;P:GO:0032880;P:GO:0008582;P:GO:0048523;P:GO:0048699;P:GO:0009966;P:GO:0044765;C:GO:0043227;P:GO:0006357;P:GO:0051049;F:GO:0005515;P:GO:0007417;P:GO:0048522;C:GO:0005737;P:GO:0016043;P:GO:0050877;P:GO:0050896;P:GO:0016567;P:GO:0006464;P:GO:0007399;P:GO:0044763;F:GO:0005488;P:GO:0032879	P:regulationofcellularlocalization;C:intracellularorganelle;P:single-organismbehavior;P:regulationofproteinlocalization;P:regulationofsynapticgrowthatneuromuscularjunction;P:negativeregulationofcellularprocess;P:generationofneurons;P:regulationofsignaltransduction;P:single-organismtransport;C:membrane-boundedorganelle;P:regulationoftranscriptionfromRNApolymeraseIIpromoter;P:regulationoftransport;…	noGOterms
TRINITY_GG_15829_c0_g1_i1	Lko057S006750	1	LOD2	FucTB	1383	gi|62484236|ref|NP_609288.4|FucTB, isoform A [Drosophila melanogaster] gi|665407297|ref|NP_001285779.1| FucTB, isoform D [Drosophila melanogaster] gi|47117925|sp|Q9VLC1.2|FUCTB_DROME RecName: Full=Alpha-(1,3)-fucosyltransferase B; AltName: Full=Galactoside 3-L-fucosyltransferase gi|25989203|gb|AAL31643.1| alpha 1,3 fucosyltransferase [Drosophila melanogaster] gi|61678296|gb|AAF52773.4| FucTB, iso…	NP_609288, NP_001285779, Q9VLC1, AAL31643, AAF52773, AAY84906, AHN54293	5.94e-94	57.9572	291.967	421	244	F:GO:0008417	F:fucosyltransferase activity	F:GO:0008417; C:GO:0016020; P:GO:0006486
TRINITY_GG_15861_c0_g1_i1	Lko057S006775	1	LOD2	CG6255 [Drosophila melanogaster]	1584	gi|116811192|emb|CAL25818.1|CG6255 [Drosophila melanogaster] gi|116811196|emb|CAL25820.1| CG6255 [Drosophila melanogaster] gi|116811202|emb|CAL25823.1| CG6255 [Drosophila melanogaster] gi|223966447|emb|CAR92960.1| CG6255-PA [Drosophila melanogaster] gi|223966449|emb|CAR92961.1| CG6255-PA [Drosophila melanogaster] gi|223966451|emb|CAR92962.1| CG6255-PA [Drosophila melanogaster] gi|223966453|emb|CA…	CAL25818, CAL25820, CAL25823, CAR92960, CAR92961, CAR92962, CAR92963, CAR92967, CAR92969, CAR92970	3.55e-113	74.1433	340.117	321	238	F:GO:0004776; C:GO:0045244; P:GO:0046331; P:GO:0006099; P:GO:0022008; F:GO:0005488	F:succinate-CoA ligase (GDP-forming) activity; C:succinate-CoA ligase complex (GDP-forming); P:lateral inhibition; P:tricarboxylic acid cycle; P:neurogenesis; F:binding	F:GO:0048037; F:GO:0003824; P:GO:0008152
TRINITY_GG_7029_c0_g1_i1	Lko057S000385	1	peak	AF132140_1excision repair protein ERCC2/XPD [Drosophila melanogaster]	4485	gi|4928442|gb|AAD33587.1|AF132140_1excision repair protein ERCC2/XPD [Drosophila melanogaster]	AAD33587	0	89.3354	1093.18	647	578	P:GO:0007088; P:GO:0007030; C:GO:0000439; P:GO:0006289; C:GO:0005783; P:GO:0009411; C:GO:0005675; P:GO:0007348; P:GO:0001113; P:GO:0051983; F:GO:0000990; F:GO:0003677; F:GO:0005524; P:GO:0001111; C:GO:0005703; C:GO:0005705; F:GO:0043141; P:GO:0010972; P:GO:0032940	P:regulation of mitotic nuclear division; P:Golgi organization; C:core TFIIH complex; P:nucleotide-excision repair; C:endoplasmic reticulum; P:response to UV; C:holo TFIIH complex; P:regulation of syncytial blastoderm mitotic cell cycle; P:transcriptional open complex formation at RNA polymerase II promoter; P:regulation of chromosome segregation; F:transcription factor activity, core RNA polymer…	F:GO:0003676; C:GO:0005634; F:GO:0005524; F:GO:0003677; F:GO:0016818; P:GO:0006289; F:GO:0008026; F:GO:0004003; P:GO:0006139
TRINITY_GG_7032_c0_g1_i1	Lko057S000385	1	peak	CG5455	1247	gi|21356915|ref|NP_651481.1|CG5455, isoform A [Drosophila melanogaster] gi|24650324|ref|NP_733152.1| CG5455, isoform B [Drosophila melanogaster] gi|7301472|gb|AAF56596.1| CG5455, isoform A [Drosophila melanogaster] gi|15291311|gb|AAK92924.1| GH15286p [Drosophila melanogaster] gi|23172359|gb|AAN14074.1| CG5455, isoform B [Drosophila melanogaster]	NP_651481, NP_733152, AAF56596, AAK92924, AAN14074	3.09e-45	77.3723	167.162	137	106	P:GO:0044707; P:GO:0030198; C:GO:0005578	P:single-multicellular organism process; P:extracellular matrix organization; C:proteinaceous extracellular matrix	no GO terms
TRINITY_GG_7028_c0_g1_i1	Lko057S000385	1	peak	CG6055	888	gi|24582512|ref|NP_609122.1|CG6055, isoform A [Drosophila melanogaster] gi|442626591|ref|NP_001260199.1| CG6055, isoform B [Drosophila melanogaster] gi|7297257|gb|AAF52521.1| CG6055, isoform A [Drosophila melanogaster] gi|25012614|gb|AAN71405.1| RE43931p [Drosophila melanogaster] gi|440213501|gb|AGB92735.1| CG6055, isoform B [Drosophila melanogaster]	NP_609122, NP_001260199, AAF52521, AAN71405, AGB92735	2.08e-139	96.0199	392.889	201	193	F:GO:0030246	F:carbohydrate binding	no GO terms
TRINITY_GG_7031_c0_g1_i1	Lko057S000385	1	peak	growth arrest specific protein 8	1750	gi|28571448|ref|NP_570065.2|growth arrest specific protein 8, isoform B [Drosophila melanogaster] gi|665389458|ref|NP_001284841.1| growth arrest specific protein 8, isoform D [Drosophila melanogaster] gi|33112298|sp|Q8MT08.1|GAS8_DROME RecName: Full=Growth arrest-specific protein 8 homolog gi|21428324|gb|AAM49822.1| AT16318p [Drosophila melanogaster] gi|28381557|gb|AAF45877.3| growth arrest speci…	NP_570065, NP_001284841, Q8MT08, AAM49822, AAF45877, AHN59312	1.83e-58	54.717	203.756	424	232	C:GO:0031514; P:GO:0030317; C:GO:0005737; F:GO:0003674	C:motile cilium; P:flagellated sperm motility; C:cytoplasm; F:molecular_function	P:GO:0048870; C:GO:0031514
TRINITY_GG_7029_c1_g1_i1	Lko057S000385	1	peak	RH28463p	583	gi|281183417|gb|ADA53577.1|RH28463p, partial [Drosophila melanogaster]	ADA53577	3.14e-43	92.9412	154.451	85	79	P:GO:0007088; C:GO:0000439; P:GO:0006289; P:GO:0009411; C:GO:0005675; P:GO:0007348; P:GO:0001113; P:GO:0051983; F:GO:0000990; F:GO:0003677; F:GO:0005524; P:GO:0001111; C:GO:0005703; C:GO:0005705; F:GO:0043141; C:GO:0005737; P:GO:0010972	P:regulation of mitotic nuclear division; C:core TFIIH complex; P:nucleotide-excision repair; P:response to UV; C:holo TFIIH complex; P:regulation of syncytial blastoderm mitotic cell cycle; P:transcriptional open complex formation at RNA polymerase II promoter; P:regulation of chromosome segregation; F:transcription factor activity, core RNA polymerase binding; F:DNA binding; F:ATP binding; P:pr…	F:GO:0005524
TRINITY_GG_7030_c0_g1_i1	Lko057S000385	1	peak	uncharacterized protein Dmel_CG12081	1515	gi|24640635|ref|NP_572494.1|uncharacterized protein Dmel_CG12081, isoform A [Drosophila melanogaster] gi|442615537|ref|NP_001259343.1| uncharacterized protein Dmel_CG12081, isoform B [Drosophila melanogaster] gi|7290955|gb|AAF46395.1| uncharacterized protein Dmel_CG12081, isoform A [Drosophila melanogaster] gi|21429068|gb|AAM50253.1| LD20420p [Drosophila melanogaster] gi|440216545|gb|AGB95186.1| …	NP_572494, NP_001259343, AAF46395, AAM50253, AGB95186	8.41e-67	50.7576	221.476	396	201	C:GO:1990234; C:GO:0044451; P:GO:0016570; P:GO:0018205	C:transferase complex; C:nucleoplasm part; P:histone modification; P:peptidyl-lysine modification	F:GO:0005515
TRINITY_GG_6580_c0_g1_i1	Lko057S000270	2	flanking	AChain A, Golgi Alpha-Mannosidase Ii In Complex With Deoxymannojirimicin	2362	gi|18655827|pdb|1HXK|AChain A, Golgi Alpha-Mannosidase Ii In Complex With Deoxymannojirimicin gi|18655949|pdb|1HWW|A Chain A, Golgi Alpha-Mannosidase Ii In Complex With Swainsonine	1HXK, 1HWW	4.59e-119	56.4407	384.415	590	333	P:GO:0006517; F:GO:0004559; P:GO:0006491; P:GO:0016063; P:GO:0035010; C:GO:0012505	P:protein deglycosylation; F:alpha-mannosidase activity; P:N-glycan processing; P:rhodopsin biosynthetic process; P:encapsulation of foreign target; C:endomembrane system	P:GO:0005975; F:GO:0004559; F:GO:0003824; P:GO:0006013; F:GO:0030246
TRINITY_GG_6580_c1_g1_i1	Lko057S000270	2	flanking	AChain A, Golgi Alpha-Mannosidase Ii In Complex With Mannostatin Analog (1r,2r, 3s,4r,5r)-5-Aminocyclopentane-1,2,3,4-Tetraol	1421	gi|251836894|pdb|3DX3|AChain A, Golgi Alpha-Mannosidase Ii In Complex With Mannostatin Analog (1r,2r, 3s,4r,5r)-5-Aminocyclopentane-1,2,3,4-Tetraol	3DX3	1.01e-47	49.6	177.948	375	186	P:GO:0019538; P:GO:0044260; C:GO:0012505; F:GO:0015924	P:protein metabolic process; P:cellular macromolecule metabolic process; C:endomembrane system; F:mannosyl-oligosaccharide mannosidase activity	P:GO:0005975; F:GO:0004559; F:GO:0003824; P:GO:0006013; F:GO:0030246
TRINITY_GG_6582_c1_g1_i1	Lko057S000270	2	flanking	partner of paired	1476	gi|17647819|ref|NP_523812.1|partner of paired, isoform A [Drosophila melanogaster] gi|665402896|ref|NP_001286743.1| partner of paired, isoform C [Drosophila melanogaster] gi|10441427|gb|AAG17034.1|AF187980_1 Partner of Paired [Drosophila melanogaster] gi|7291460|gb|AAF46886.1| partner of paired, isoform A [Drosophila melanogaster] gi|21430560|gb|AAM50958.1| RE01138p [Drosophila melanogaster] gi|5…	NP_523812, NP_001286743, AAG17034, AAF46886, AAM50958, AHN56538	3.83e-05	39.2749	47.3654	331	130	F:GO:0004842; P:GO:0031146; C:GO:0019005	F:ubiquitin-protein transferase activity; P:SCF-dependent proteasomal ubiquitin-dependent protein catabolic process; C:SCF ubiquitin ligase complex	F:GO:0005515
TRINITY_GG_14733_c0_g1_i1	Lko057S005462	2	flanking	PREDICTED: kynurenine formamidase-like [Halyomorpha halys]	1067	gi|939653282|ref|XP_014275456.1|PREDICTED: kynurenine formamidase-like [Halyomorpha halys]	XP_014275456	1.5e-57	61.3043	194.126	230	141	F:GO:0004061; P:GO:0019441; C:GO:0016020; C:GO:0016021	F:arylformamidase activity; P:tryptophan catabolic process to kynurenine; C:membrane; C:integral component of membrane	F:GO:0004061; P:GO:0019441
TRINITY_GG_6617_c5_g1_i1	Lko057S000277	2	LOD1	AChain A, Drosophila Robo Ig1-2 (Monoclinic Form)	268	gi|178847385|pdb|2VRA|AChain A, Drosophila Robo Ig1-2 (Monoclinic Form) gi|178847386|pdb|2VRA|B Chain B, Drosophila Robo Ig1-2 (Monoclinic Form) gi|178847387|pdb|2VRA|C Chain C, Drosophila Robo Ig1-2 (Monoclinic Form) gi|178847388|pdb|2VRA|D Chain D, Drosophila Robo Ig1-2 (Monoclinic Form)	2VRA, 2VRA, 2VRA, 2VRA	2.13e-42	82.0225	137.887	89	73	P:GO:0035385; P:GO:0046716; P:GO:0008045; P:GO:0022409; P:GO:0003151; P:GO:0007432; F:GO:0008201; P:GO:0048854; C:GO:0043025; P:GO:0050773; C:GO:0005887; C:GO:0030425; P:GO:0001764; P:GO:0007427; P:GO:0009649; P:GO:0001964; P:GO:0016199; P:GO:0070983; F:GO:0042803; P:GO:0016319; P:GO:2000274; C:GO:0043234; P:GO:0035050; P:GO:0042685; F:GO:0004872; P:GO:0007426; P:GO:0008039; P:GO:0007419; P:GO:00…	P:Roundabout signaling pathway; P:muscle cell cellular homeostasis; P:motor neuron axon guidance; P:positive regulation of cell-cell adhesion; P:outflow tract morphogenesis; P:salivary gland boundary specification; F:heparin binding; P:brain morphogenesis; C:neuronal cell body; P:regulation of dendrite development; C:integral component of plasma membrane; C:dendrite; P:neuron migration; P:epithel…	no GO terms
TRINITY_GG_6616_c0_g1_i1	Lko057S000277	2	LOD1	AChain A, Solution Structure Of Drosophila Melanogaster Snf Rbd1	1445	gi|189339509|pdb|2K3K|AChain A, Solution Structure Of Drosophila Melanogaster Snf Rbd1	2K3K	8.68e-49	94.2308	163.696	104	98	F:GO:0042802; P:GO:0022008; C:GO:0043234; F:GO:0008266; C:GO:0005686; C:GO:0005685; P:GO:0000398; F:GO:0000166; P:GO:0007539; C:GO:0071013; F:GO:0097158; P:GO:0000381; P:GO:0048477; C:GO:0071011; F:GO:0030619; P:GO:0019099; F:GO:0003729; F:GO:0035614; F:GO:0030620	F:identical protein binding; P:neurogenesis; C:protein complex; F:poly(U) RNA binding; C:U2 snRNP; C:U1 snRNP; P:mRNA splicing, via spliceosome; F:nucleotide binding; P:primary sex determination, soma; C:catalytic step 2 spliceosome; F:pre-mRNA intronic pyrimidine-rich binding; P:regulation of alternative mRNA splicing, via spliceosome; P:oogenesis; C:precatalytic spliceosome; F:U1 snRNA binding;…	F:GO:0003676
TRINITY_GG_6627_c4_g1_i1;TRINITY_GG_6627_c5_g1_i1;TRINITY_GG_6627_c8_g1_i1;TRINITY_GG_6627_c9_g1_i1	Lko057S000277	2	LOD1	AF255733_1DNA topoisomerase III alpha [Drosophila melanogaster]	228	gi|7960302|gb|AAF71288.1|AF255733_1DNA topoisomerase III alpha [Drosophila melanogaster]	AAF71288	1.4e-32	82.4324	118.627	74	61	C:GO:0043229;P:GO:0009987;C:GO:0005634;F:GO:0003677;F:GO:0008270;C:GO:0005739;P:GO:0000724;F:GO:0003917;C:GO:0005694;P:GO:0006265;P:GO:0042246;P:GO:0051965;P:GO:0000002;F:GO:0003916;F:GO:0005488	C:intracellularorganelle;P:cellularprocess;C:nucleus;F:DNAbinding;F:zincionbinding;C:mitochondrion;P:double-strandbreakrepairviahomologousrecombination;F:DNAtopoisomerasetypeIactivity;C:chromosome;P:DNAtopologicalchange;P:tissueregeneration;P:positiveregulationofsynapseassembly;P:mitochondrialgenomemaintenance;F:DNAtopoisomeraseactivity;F:binding	F:GO:0003676;F:GO:0008270;F:GO:0003677;F:GO:0003916;P:GO:0006265
TRINITY_GG_6629_c1_g1_i1	Lko057S000277	2	LOD1	AF311878_11-cys peroxiredoxin DPx-6005 [Drosophila melanogaster]	1106	gi|12044361|gb|AAG47822.1|AF311878_11-cys peroxiredoxin DPx-6005 [Drosophila melanogaster]	AAG47822	1.47e-107	79.4521	315.464	219	174	F:GO:0004601; C:GO:0043229; P:GO:0006979; C:GO:0070062; P:GO:0007498; P:GO:0051716; C:GO:0005829; P:GO:0019233; P:GO:0045454; P:GO:0055114; F:GO:0051920; P:GO:0042744	F:peroxidase activity; C:intracellular organelle; P:response to oxidative stress; C:extracellular exosome; P:mesoderm development; P:cellular response to stimulus; C:cytosol; P:sensory perception of pain; P:cell redox homeostasis; P:oxidation-reduction process; F:peroxiredoxin activity; P:hydrogen peroxide catabolic process	F:GO:0016209; F:GO:0016491; P:GO:0055114; P:GO:0045454; F:GO:0051920
TRINITY_GG_6626_c0_g1_i1	Lko057S000277	2	LOD1	asparagine synthetase [Drosophila melanogaster]	2565	gi|45553209|ref|NP_996132.1|asparagine synthetase [Drosophila melanogaster] gi|45446054|gb|AAS65085.1| asparagine synthetase [Drosophila melanogaster] gi|162944742|gb|ABY20440.1| GH20374p [Drosophila melanogaster]	NP_996132, AAS65085, ABY20440	9.48e-82	53.4602	274.248	578	309	P:GO:0006529; F:GO:0004066	P:asparagine biosynthetic process; F:asparagine synthase (glutamine-hydrolyzing) activity	P:GO:0006529; F:GO:0004066
TRINITY_GG_6629_c2_g1_i1	Lko057S000277	2	LOD1	CG1671 [Drosophila melanogaster]	2684	gi|24652208|ref|NP_610526.1|CG1671 [Drosophila melanogaster] gi|7303841|gb|AAF58888.1| CG1671 [Drosophila melanogaster] gi|28416343|gb|AAO42644.1| LD47550p [Drosophila melanogaster]	NP_610526, AAF58888, AAO42644	1.97e-155	58.6207	476.478	812	476	P:GO:0008283; P:GO:0007293; P:GO:0060541; P:GO:0070727; P:GO:0008285; P:GO:0022607; P:GO:0006464; P:GO:0008104; P:GO:0022402; P:GO:0007411; P:GO:0048513; P:GO:0006325; C:GO:0043005; C:GO:0005875; P:GO:0007610; P:GO:0007309; P:GO:0009628; P:GO:0009968; C:GO:0030529; F:GO:0003824; P:GO:0051241; P:GO:0010970; P:GO:0050877; P:GO:0051647; P:GO:0034645; P:GO:0090304; P:GO:0065008; P:GO:0007088; P:GO:00…	P:cell proliferation; P:germarium-derived egg chamber formation; P:respiratory system development; P:cellular macromolecule localization; P:negative regulation of cell proliferation; P:cellular component assembly; P:cellular protein modification process; P:protein localization; P:cell cycle process; P:axon guidance; P:animal organ development; P:chromatin organization; C:neuron projection; C:micr…	C:GO:0032040; F:GO:0005515; P:GO:0006364
TRINITY_GG_6628_c0_g1_i1	Lko057S000277	2	LOD1	CG5355 [Drosophila melanogaster]	2409	gi|24583414|ref|NP_609397.2|CG5355 [Drosophila melanogaster] gi|22946157|gb|AAF52942.2| CG5355 [Drosophila melanogaster] gi|54650756|gb|AAV36957.1| LP07359p [Drosophila melanogaster]	NP_609397, AAF52942, AAV36957	0	72.9313	842.417	713	520	F:GO:0008236; F:GO:0052689	F:serine-type peptidase activity; F:carboxylic ester hydrolase activity	P:GO:0006508; F:GO:0004252; F:GO:0008236; F:GO:0070008
TRINITY_GG_6627_c1_g1_i1	Lko057S000277	2	LOD1	CG6142 [Drosophila melanogaster]	204	gi|24650267|ref|NP_651466.1|CG6142 [Drosophila melanogaster] gi|7301449|gb|AAF56574.1| CG6142 [Drosophila melanogaster]	NP_651466, AAF56574	2.15e-08	62.5	49.2914	64	40	P:GO:0007498	P:mesoderm development	F:GO:0016614; F:GO:0050660; P:GO:0055114
TRINITY_GG_6627_c0_g1_i3	Lko057S000277	2	LOD1	CG9514 [Drosophila melanogaster]	1088	gi|24642048|ref|NP_572981.1|CG9514 [Drosophila melanogaster] gi|7293013|gb|AAF48400.1| CG9514 [Drosophila melanogaster] gi|211938557|gb|ACJ13175.1| FI04917p [Drosophila melanogaster]	NP_572981, AAF48400, ACJ13175	5.7e-59	59.7222	203.756	288	172	P:GO:0044281; F:GO:0016491; P:GO:0046693; P:GO:0046331; P:GO:0019233; P:GO:0002165; P:GO:0044238; P:GO:0071704; C:GO:0042600; P:GO:0034976	P:small molecule metabolic process; F:oxidoreductase activity; P:sperm storage; P:lateral inhibition; P:sensory perception of pain; P:instar larval or pupal development; P:primary metabolic process; P:organic substance metabolic process; C:chorion; P:response to endoplasmic reticulum stress	F:GO:0016614; F:GO:0050660; F:GO:0016491; P:GO:0055114
TRINITY_GG_6624_c2_g1_i1	Lko057S000277	2	LOD1	histone H3.3B	1337	gi|17530867|ref|NP_511095.1|histone H3.3B, isoform A [Drosophila melanogaster] gi|17647507|ref|NP_523479.1| histone H3.3A, isoform A [Drosophila melanogaster] gi|24640743|ref|NP_727314.1| histone H3.3B, isoform B [Drosophila melanogaster] gi|28571378|ref|NP_788892.1| histone H3.3B, isoform C [Drosophila melanogaster] gi|442615645|ref|NP_001259374.1| histone H3.3B, isoform E [Drosophila melanogast…	NP_511095, NP_523479, NP_727314, NP_788892, NP_001259374, NP_001260082, NP_723056, P84249, CAA37819, CAA57080, CAA57077, CAA57712, AAF46452, AAF52213, AAL48679, AAM48354, AAM50283, AAN09245, AAO41645, AGB92618, AAN10526, AGB95217, ANY27147, ANY27398	2.18e-91	100	273.863	136	136	P:GO:0008360; P:GO:0070925; P:GO:0007140; F:GO:0031492; P:GO:0007059; C:GO:0000788; P:GO:0007067; P:GO:0007155; C:GO:0000776; P:GO:0006334; C:GO:0005700; C:GO:0000780; F:GO:0046982; P:GO:0051383	P:regulation of cell shape; P:organelle assembly; P:male meiosis; F:nucleosomal DNA binding; P:chromosome segregation; C:nuclear nucleosome; P:mitotic nuclear division; P:cell adhesion; C:kinetochore; P:nucleosome assembly; C:polytene chromosome; C:condensed nuclear chromosome, centromeric region; F:protein heterodimerization activity; P:kinetochore organization	F:GO:0003677; F:GO:0046982; C:GO:0000786
TRINITY_GG_6617_c4_g1_i1	Lko057S000277	2	LOD1	IP14966p	322	gi|115646404|gb|ABJ17045.1|IP14966p, partial [Drosophila melanogaster]	ABJ17045	4.05e-18	63.3028	78.9518	109	69	P:GO:0035385; P:GO:0046716; P:GO:0008045; P:GO:0022409; P:GO:0003151; P:GO:0007432; F:GO:0008201; P:GO:0048854; C:GO:0043025; P:GO:0050773; C:GO:0030425; P:GO:0001764; P:GO:0007427; P:GO:0009649; P:GO:0001964; P:GO:0016199; P:GO:0070983; F:GO:0042803; P:GO:0016319; P:GO:2000274; C:GO:0043234; P:GO:0035050; P:GO:0042685; F:GO:0004872; C:GO:0005886; P:GO:0008039; P:GO:0007419; P:GO:0031987; P:GO:00…	P:Roundabout signaling pathway; P:muscle cell cellular homeostasis; P:motor neuron axon guidance; P:positive regulation of cell-cell adhesion; P:outflow tract morphogenesis; P:salivary gland boundary specification; F:heparin binding; P:brain morphogenesis; C:neuronal cell body; P:regulation of dendrite development; C:dendrite; P:neuron migration; P:epithelial cell migration, open tracheal system;…	F:GO:0005515
TRINITY_GG_6625_c0_g1_i1	Lko057S000277	2	LOD1	octopamine beta2 receptor	251	gi|442618720|ref|NP_001163596.2|octopamine beta2 receptor, isoform F [Drosophila melanogaster] gi|440217348|gb|ACZ94893.2| octopamine beta2 receptor, isoform F [Drosophila melanogaster]	NP_001163596, ACZ94893	8.18e-29	87.5	108.227	72	63	C:GO:0005887; F:GO:0003700; F:GO:0004989; P:GO:0051482; P:GO:0030728; P:GO:0006355; P:GO:0009566; P:GO:0045886; F:GO:0043565; P:GO:0010579; P:GO:0045887	C:integral component of plasma membrane; F:transcription factor activity, sequence-specific DNA binding; F:octopamine receptor activity; P:positive regulation of cytosolic calcium ion concentration involved in phospholipase C-activating G-protein coupled signaling pathway; P:ovulation; P:regulation of transcription, DNA-templated; P:fertilization; P:negative regulation of synaptic growth at neuro…	F:GO:0004930; P:GO:0007186; C:GO:0016021
TRINITY_GG_6629_c0_g1_i1	Lko057S000277	2	LOD1	RAD50 interactor 1 [Drosophila melanogaster]	2816	gi|24659930|ref|NP_648102.2|RAD50 interactor 1 [Drosophila melanogaster] gi|61233003|sp|Q9VS46.2|RINT1_DROME RecName: Full=RINT1-like protein; Short=DmRINT-1 gi|23094005|gb|AAF50583.2| RAD50 interactor 1 [Drosophila melanogaster] gi|211938535|gb|ACJ13164.1| FI03678p [Drosophila melanogaster]	NP_648102, Q9VS46, AAF50583, ACJ13164	1.37e-101	53.8462	334.339	637	343	P:GO:0061640; P:GO:0006996	P:cytoskeleton-dependent cytokinesis; P:organelle organization	C:GO:0005783; P:GO:0048193
TRINITY_GG_6627_c0_g1_i1	Lko057S000277	2	LOD1	RE61267p [Drosophila melanogaster]	2771	gi|21711769|gb|AAM75075.1|RE61267p [Drosophila melanogaster]	AAM75075	9.96e-59	57.622	215.698	328	189	P:GO:0044281; F:GO:0016491; P:GO:0046693; P:GO:0046331; P:GO:0019233; P:GO:0002165; P:GO:0044238; P:GO:0071704; P:GO:0034976	P:small molecule metabolic process; F:oxidoreductase activity; P:sperm storage; P:lateral inhibition; P:sensory perception of pain; P:instar larval or pupal development; P:primary metabolic process; P:organic substance metabolic process; P:response to endoplasmic reticulum stress	F:GO:0016614; F:GO:0050660; F:GO:0016491; P:GO:0055114
TRINITY_GG_6617_c3_g1_i1	Lko057S000277	2	LOD1	roundabout 1 [Drosophila melanogaster]	233	gi|2804782|gb|AAC38849.1|roundabout 1 [Drosophila melanogaster]	AAC38849	5.73e-28	77.027	105.531	74	57	P:GO:0035385; P:GO:0046716; P:GO:0008045; P:GO:0022409; P:GO:0003151; P:GO:0007432; F:GO:0008201; P:GO:0048854; C:GO:0043025; P:GO:0050773; C:GO:0005887; C:GO:0030425; P:GO:0001764; P:GO:0007427; P:GO:0009649; P:GO:0001964; P:GO:0051606; P:GO:0016199; P:GO:0070983; F:GO:0042803; P:GO:0016319; P:GO:2000274; C:GO:0043234; P:GO:0035050; P:GO:0042685; F:GO:0004872; P:GO:0007426; P:GO:0008039; P:GO:00…	P:Roundabout signaling pathway; P:muscle cell cellular homeostasis; P:motor neuron axon guidance; P:positive regulation of cell-cell adhesion; P:outflow tract morphogenesis; P:salivary gland boundary specification; F:heparin binding; P:brain morphogenesis; C:neuronal cell body; P:regulation of dendrite development; C:integral component of plasma membrane; C:dendrite; P:neuron migration; P:epithel…	no GO terms
TRINITY_GG_6627_c6_g1_i1	Lko057S000277	2	LOD1	topoisomerase 3alpha [Drosophila melanogaster]	291	gi|24585251|ref|NP_523602.2|topoisomerase 3alpha [Drosophila melanogaster] gi|33860232|sp|Q9NG98.2|TOP3A_DROME RecName: Full=DNA topoisomerase 3-alpha; AltName: Full=DNA topoisomerase III alpha gi|22946848|gb|AAF53813.2| topoisomerase 3alpha [Drosophila melanogaster] gi|51092196|gb|AAT94511.1| LD04601p [Drosophila melanogaster]	NP_523602, Q9NG98, AAF53813, AAT94511	1.23e-41	80.2083	145.591	96	77	C:GO:0005634; F:GO:0003677; F:GO:0008270; C:GO:0005739; P:GO:0000724; F:GO:0003917; C:GO:0005694; P:GO:0006265; P:GO:0042246; P:GO:0051965; P:GO:0000002	C:nucleus; F:DNA binding; F:zinc ion binding; C:mitochondrion; P:double-strand break repair via homologous recombination; F:DNA topoisomerase type I activity; C:chromosome; P:DNA topological change; P:tissue regeneration; P:positive regulation of synapse assembly; P:mitochondrial genome maintenance	no GO terms
TRINITY_GG_6624_c0_g1_i1	Lko057S000277	2	LOD1	uncharacterized protein Dmel_CG17294 [Drosophila melanogaster]	1363	gi|19920940|ref|NP_609219.1|uncharacterized protein Dmel_CG17294 [Drosophila melanogaster] gi|7297397|gb|AAF52656.1| uncharacterized protein Dmel_CG17294 [Drosophila melanogaster] gi|15010468|gb|AAK77282.1| GH05949p [Drosophila melanogaster]	NP_609219, AAF52656, AAK77282	3.47e-80	71.9368	249.595	253	182	C:GO:0005634; F:GO:0004427; C:GO:0005737; P:GO:0006796	C:nucleus; F:inorganic diphosphatase activity; C:cytoplasm; P:phosphate-containing compound metabolic process	no GO terms
TRINITY_GG_6630_c0_g1_i1	Lko057S000277	2	LOD1	uncharacterized protein Dmel_CG30373	1753	gi|24586529|ref|NP_724654.1|uncharacterized protein Dmel_CG30373, isoform A [Drosophila melanogaster] gi|665399492|ref|NP_001286189.1| uncharacterized protein Dmel_CG30373, isoform B [Drosophila melanogaster] gi|21627710|gb|AAM68855.1| uncharacterized protein Dmel_CG30373, isoform A [Drosophila melanogaster] gi|599126685|gb|AHN55987.1| uncharacterized protein Dmel_CG30373, isoform B [Drosophila m…	NP_724654, NP_001286189, AAM68855, AHN55987, ANY27624	4.55e-29	64.7541	113.62	122	79	P:GO:0008150; C:GO:0005575; F:GO:0003674	P:biological_process; C:cellular_component; F:molecular_function	no GO terms
TRINITY_GG_6618_c0_g1_i1	Lko057S000277	2	LOD1	uncharacterized protein Dmel_CG42342	5213	gi|442619464|ref|NP_001262641.1|uncharacterized protein Dmel_CG42342, isoform T [Drosophila melanogaster] gi|440217506|gb|AGB96021.1| uncharacterized protein Dmel_CG42342, isoform T [Drosophila melanogaster]	NP_001262641, AGB96021	3.01e-08	59.7826	59.6918	92	55	C:GO:0005811; P:GO:0035848; P:GO:0048621; C:GO:0005581; P:GO:0007519; P:GO:0060729; P:GO:0007443; P:GO:0055013; P:GO:0061327	C:lipid particle; P:oviduct morphogenesis; P:post-embryonic digestive tract morphogenesis; C:collagen trimer; P:skeletal muscle tissue development; P:intestinal epithelial structure maintenance; P:Malpighian tubule morphogenesis; P:cardiac muscle cell development; P:anterior Malpighian tubule development	F:GO:0005201
TRINITY_GG_6627_c0_g1_i2	Lko057S000277	2	LOD1	uncharacterized protein Dmel_CG45065 [Drosophila melanogaster]	1705	gi|665391372|ref|NP_001285251.1|uncharacterized protein Dmel_CG45065 [Drosophila melanogaster] gi|21483532|gb|AAM52741.1| RE28171p [Drosophila melanogaster] gi|599137969|gb|AHN59721.1| uncharacterized protein Dmel_CG45065 [Drosophila melanogaster]	NP_001285251, AAM52741, AHN59721	5.54e-60	63.6364	210.69	231	147	P:GO:0044281; F:GO:0016491; P:GO:0046693; P:GO:0046331; P:GO:0019233; P:GO:0002165; P:GO:0044238; P:GO:0071704; C:GO:0042600; P:GO:0034976	P:small molecule metabolic process; F:oxidoreductase activity; P:sperm storage; P:lateral inhibition; P:sensory perception of pain; P:instar larval or pupal development; P:primary metabolic process; P:organic substance metabolic process; C:chorion; P:response to endoplasmic reticulum stress
TRINITY_GG_6624_c3_g1_i1	Lko057S000277	2	LOD1	unkempt	5312	gi|939620287|ref|NP_001303430.1|unkempt, isoform G [Drosophila melanogaster] gi|937462764|gb|ALI30632.1| unkempt, isoform G [Drosophila melanogaster]	NP_001303430, ALI30632	2.53e-171	86.5443	535.798	327	283	F:GO:0003677; F:GO:0008270; P:GO:0008407; C:GO:0005737; P:GO:0030182; P:GO:0007476; P:GO:0002164; P:GO:0048749; P:GO:0050767	F:DNA binding; F:zinc ion binding; P:chaeta morphogenesis; C:cytoplasm; P:neuron differentiation; P:imaginal disc-derived wing morphogenesis; P:larval development; P:compound eye development; P:regulation of neurogenesis	F:GO:0046872
TRINITY_GG_6615_c0_g1_i1;TRINITY_GG_6615_c0_g1_i2;TRINITY_GG_6615_c0_g1_i3;TRINITY_GG_6615_c0_g1_i4	Lko057S000277	2	LOD1	vacuolar H[+] ATPase 100kD subunit 1	3746	gi|24650959|ref|NP_733271.1|vacuolar H[+] ATPase 100kD subunit 1, isoform A [Drosophila melanogaster] gi|24650961|ref|NP_733272.1| vacuolar H[+] ATPase 100kD subunit 1, isoform F [Drosophila melanogaster] gi|23172535|gb|AAN14155.1| vacuolar H[+] ATPase 100kD subunit 1, isoform A [Drosophila melanogaster] gi|23172536|gb|AAN14156.1| vacuolar H[+] ATPase 100kD subunit 1, isoform F [Drosophila melano…	NP_733271, NP_733272, AAN14155, AAN14156	0	86.2275	1285.01	835	720	C:GO:0033181;P:GO:0015991;F:GO:0009881;C:GO:0008021;F:GO:0046961;P:GO:0007430;P:GO:0009416;P:GO:0048749;C:GO:0000220;P:GO:0097352;C:GO:0005769;F:GO:0005516;P:GO:0048388;P:GO:0050965	C:plasmamembraneproton-transportingV-typeATPasecomplex;P:ATPhydrolysiscoupledprotontransport;F:photoreceptoractivity;C:synapticvesicle;F:proton-transportingATPaseactivity,rotationalmechanism;P:terminalbranching,opentrachealsystem;P:responsetolightstimulus;P:compoundeyedevelopment;C:vacuolarproton-transportingV-typeATPase,V0domain;P:autophagosomematuration;C:earlyendosome;F:calmodulinbinding;P:end…	C:GO:0000220;F:GO:0015078;P:GO:0015991;C:GO:0033179
TRINITY_GG_7098_c3_g1_i1	Lko057S000409	2	LOD1	BChain B, Crystal Structure Of The Complex Of Dpr6 Domain 1 Bound To Dip-alpha Domain 1+2	305	gi|971826090|pdb|5EO9|BChain B, Crystal Structure Of The Complex Of Dpr6 Domain 1 Bound To Dip-alpha Domain 1+2	5EO9	3.09e-48	86	153.295	100	86	C:GO:0005887; P:GO:0007529; P:GO:1904396; P:GO:0072499; C:GO:0032589	C:integral component of plasma membrane; P:establishment of synaptic specificity at neuromuscular junction; P:regulation of neuromuscular junction development; P:photoreceptor cell axon guidance; C:neuron projection membrane	no GO terms
TRINITY_GG_7099_c0_g1_i1;TRINITY_GG_7099_c0_g1_i2	Lko057S000409	2	LOD1	ceramide transfer protein	4286	gi|21356053|ref|NP_648199.1|ceramide transfer protein, isoform A [Drosophila melanogaster] gi|665410066|ref|NP_001286978.1| ceramide transfer protein, isoform C [Drosophila melanogaster] gi|5052578|gb|AAD38619.1|AF145644_1 BcDNA.GH07688 [Drosophila melanogaster] gi|7295129|gb|AAF50454.1| ceramide transfer protein, isoform A [Drosophila melanogaster] gi|599131179|gb|AHN58003.1| ceramide transfer p…	NP_648199, NP_001286978, AAD38619, AAF50454, AHN58003	0	70.0813	623.239	615	431	F:GO:0097001;F:GO:0070273;C:GO:0005783;C:GO:0005794;F:GO:0035620;P:GO:0035621;P:GO:0006665;P:GO:0007291;P:GO:0007030;P:GO:0006886	F:ceramidebinding;F:phosphatidylinositol-4-phosphatebinding;C:endoplasmicreticulum;C:Golgiapparatus;F:ceramidetransporteractivity;P:ERtoGolgiceramidetransport;P:sphingolipidmetabolicprocess;P:spermindividualization;P:Golgiorganization;P:intracellularproteintransport	F:GO:0008289
TRINITY_GG_7095_c1_g1_i1	Lko057S000409	2	LOD1	CG8034	1870	gi|161077961|ref|NP_573376.2|CG8034, isoform A [Drosophila melanogaster] gi|158031876|gb|AAF48947.2| CG8034, isoform A [Drosophila melanogaster]	NP_573376, AAF48947	8.52e-54	66.055	195.667	218	144	P:GO:0044699; C:GO:0044459	P:single-organism process; C:plasma membrane part	P:GO:0055085; C:GO:0016021
TRINITY_GG_7098_c1_g1_i1;TRINITY_GG_7098_c4_g1_i1	Lko057S000409	2	LOD1	Dpr-interacting protein alpha	1403	gi|442615078|ref|NP_001259217.1|Dpr-interacting protein alpha, isoform B [Drosophila melanogaster] gi|440216409|gb|AGB95063.1| Dpr-interacting protein alpha, isoform B [Drosophila melanogaster]	NP_001259217, AGB95063	2.35e-65	82.6923	217.624	156	129	C:GO:0005887;P:GO:0007529;P:GO:1904396;P:GO:0072499;C:GO:0032589	C:integralcomponentofplasmamembrane;P:establishmentofsynapticspecificityatneuromuscularjunction;P:regulationofneuromuscularjunctiondevelopment;P:photoreceptorcellaxonguidance;C:neuronprojectionmembrane	noGOterms
TRINITY_GG_7102_c0_g1_i1	Lko057S000409	2	LOD1	gag protein [Drosophila melanogaster]	2635	gi|48596237|emb|CAG25619.1|gag protein [Drosophila melanogaster]	CAG25619	9.78e-09	50.7463	60.4622	67	34			F:GO:0003676; F:GO:0008270
TRINITY_GG_7097_c0_g1_i1	Lko057S000409	2	LOD1	lamin	4379	gi|17136290|ref|NP_476616.1|lamin, isoform A [Drosophila melanogaster] gi|386769141|ref|NP_001245892.1| lamin, isoform B [Drosophila melanogaster] gi|386769143|ref|NP_001245893.1| lamin, isoform C [Drosophila melanogaster] gi|665404412|ref|NP_001285629.1| lamin, isoform D [Drosophila melanogaster] gi|78099783|sp|P08928.4|LAM0_DROME RecName: Full=Lamin Dm0; Flags: Precursor gi|7296991|gb|AAF52262.…	NP_476616, NP_001245892, NP_001245893, NP_001285629, P08928, AAF52262, AAN71261, AFH03566, AFH03567, AHN54144	2.03e-153	70.0658	480.33	608	426	P:GO:0031081; P:GO:0090435; P:GO:0008285; P:GO:0035262; P:GO:0007097; F:GO:0005198; P:GO:0007430; P:GO:0008344; C:GO:0005875; C:GO:0072686; P:GO:0001745; P:GO:0050777; P:GO:0007084; P:GO:0040003; P:GO:0007283; P:GO:0060415; P:GO:0048546; P:GO:0007569; C:GO:0005635; C:GO:0005811; P:GO:0030833; C:GO:0005813; F:GO:0005515; P:GO:0007417; P:GO:0051297; P:GO:0070870; C:GO:0005638; P:GO:0046331; C:GO:00…	P:nuclear pore distribution; P:protein localization to nuclear envelope; P:negative regulation of cell proliferation; P:gonad morphogenesis; P:nuclear migration; F:structural molecule activity; P:terminal branching, open tracheal system; P:adult locomotory behavior; C:microtubule associated complex; C:mitotic spindle; P:compound eye morphogenesis; P:negative regulation of immune response; P:mitot…	F:GO:0005198; C:GO:0005882
TRINITY_GG_8244_c0_g1_i1;TRINITY_GG_8251_c0_g1_i1	Lko057S000658	2	LOD1	CG5065	3226	gi|24654209|ref|NP_611143.1|CG5065, isoform A [Drosophila melanogaster] gi|281363509|ref|NP_001163168.1| CG5065, isoform B [Drosophila melanogaster] gi|281363511|ref|NP_001163169.1| CG5065, isoform C [Drosophila melanogaster] gi|386768124|ref|NP_001246370.1| CG5065, isoform D [Drosophila melanogaster] gi|386768126|ref|NP_001246371.1| CG5065, isoform E [Drosophila melanogaster] gi|238064958|sp|A1Z…	NP_611143, NP_001163168, NP_001163169, NP_001246370, NP_001246371, A1ZAI5, AAF57974, ACZ94440, ACZ94441, AFH08123, AFH08124	0	74.6204	588.571	461	344	P:GO:0035002;P:GO:0008340;F:GO:0050062;F:GO:0080019;P:GO:0008611;C:GO:0005778;C:GO:0045177;P:GO:0006909;C:GO:0012505;P:GO:0019233;P:GO:0055114;P:GO:0035149;P:GO:0010025	P:liquidclearance,opentrachealsystem;P:determinationofadultlifespan;F:long-chain-fatty-acyl-CoAreductaseactivity;F:fatty-acyl-CoAreductase(alcohol-forming)activity;P:etherlipidbiosyntheticprocess;C:peroxisomalmembrane;C:apicalpartofcell;P:phagocytosis;C:endomembranesystem;P:sensoryperceptionofpain;P:oxidation-reductionprocess;P:lumenformation,opentrachealsystem;P:waxbiosyntheticprocess	noGOterms
TRINITY_GG_8247_c1_g1_i1	Lko057S000658	2	LOD1	CG6465 [Drosophila melanogaster]	3777	gi|21356353|ref|NP_650004.1|CG6465 [Drosophila melanogaster] gi|10726439|gb|AAG22139.1| CG6465 [Drosophila melanogaster] gi|15010432|gb|AAK77264.1| GH04054p [Drosophila melanogaster]	NP_650004, AAG22139, AAK77264	1.44e-144	75.5725	444.121	393	297	P:GO:0044238; P:GO:0071704; F:GO:0016787	P:primary metabolic process; P:organic substance metabolic process; F:hydrolase activity	C:GO:0005737; P:GO:0008152; P:GO:0006508; P:GO:0006520; F:GO:0004046; F:GO:0016787; F:GO:0008237
TRINITY_GG_8237_c1_g1_i1	Lko057S000658	2	LOD1	degringolade	597	gi|21357313|ref|NP_649596.1|degringolade, isoform A [Drosophila melanogaster] gi|7296664|gb|AAF51944.1| degringolade, isoform A [Drosophila melanogaster] gi|16768306|gb|AAL28372.1| GM01182p [Drosophila melanogaster]	NP_649596, AAF51944, AAL28372	7.65e-06	57.1429	46.2098	56	32	F:GO:0061630; C:GO:0035102; P:GO:0007275; P:GO:0008104; P:GO:0007476; P:GO:0030708; P:GO:0022008; P:GO:0007530; P:GO:0006342; C:GO:0005730; P:GO:0045747; C:GO:0005575; F:GO:0001103; P:GO:0035518; P:GO:0001745; P:GO:0043393; P:GO:0045893; C:GO:0031519; P:GO:0070201; P:GO:0007480; F:GO:0032183; P:GO:0007062; P:GO:0008150; F:GO:0008270; P:GO:0008593; P:GO:0000209; P:GO:0000724; P:GO:0045995; C:GO:00…	F:ubiquitin protein ligase activity; C:PRC1 complex; P:multicellular organism development; P:protein localization; P:imaginal disc-derived wing morphogenesis; P:germarium-derived female germ-line cyst encapsulation; P:neurogenesis; P:sex determination; P:chromatin silencing; C:nucleolus; P:positive regulation of Notch signaling pathway; C:cellular_component; F:RNA polymerase II repressing transcr…	F:GO:0046872
TRINITY_GG_8234_c1_g1_i1;TRINITY_GG_8239_c0_g1_i1	Lko057S000658	2	LOD1	down syndrome cell adhesion molecule 4	4874	gi|221330976|ref|NP_001137908.1|down syndrome cell adhesion molecule 4, isoform D [Drosophila melanogaster] gi|221330978|ref|NP_001036596.2| down syndrome cell adhesion molecule 4, isoform E [Drosophila melanogaster] gi|220902513|gb|ACL83263.1| down syndrome cell adhesion molecule 4, isoform D [Drosophila melanogaster] gi|220902514|gb|ABI31245.2| down syndrome cell adhesion molecule 4, isoform E …	NP_001137908, NP_001036596, ACL83263, ABI31245	2.55e-50	42.9421	197.978	673	289	P:GO:0009605;P:GO:0032989;P:GO:0031175;C:GO:0097458;F:GO:0005488;P:GO:0016043;P:GO:0009653;P:GO:0048666	P:responsetoexternalstimulus;P:cellularcomponentmorphogenesis;P:neuronprojectiondevelopment;C:neuronpart;F:binding;P:cellularcomponentorganization;P:anatomicalstructuremorphogenesis;P:neurondevelopment	F:GO:0005509;F:GO:0008237;noGOterms
TRINITY_GG_8252_c0_g1_i1	Lko057S000658	2	LOD1	GH27092p	6762	gi|27820049|gb|AAL39369.2|GH27092p, partial [Drosophila melanogaster]	AAL39369	0	56.5127	1183.32	1927	1089	C:GO:0044424	C:intracellular part	F:GO:0032947; P:GO:0043248; F:GO:0005488
TRINITY_GG_8237_c0_g1_i1	Lko057S000658	2	LOD1	IP08164p [Drosophila melanogaster]	1369	gi|66770759|gb|AAY54691.1|IP08164p [Drosophila melanogaster]	AAY54691	1.34e-05	46.6019	46.9802	103	48	C:GO:0005634; P:GO:0016319; P:GO:0007279; P:GO:0007067; F:GO:0003674; P:GO:0045448	C:nucleus; P:mushroom body development; P:pole cell formation; P:mitotic nuclear division; F:molecular_function; P:mitotic cell cycle, embryonic	P:GO:0006281; F:GO:0004842; C:GO:0005634; F:GO:0003677; F:GO:0008270
TRINITY_GG_8253_c6_g1_i1	Lko057S000658	2	LOD1	jumeau [Drosophila melanogaster]	293	gi|17737881|ref|NP_524302.1|jumeau [Drosophila melanogaster] gi|5531247|emb|CAB51032.1| DOMINA protein (WHN-homologue) [Drosophila melanogaster] gi|5541760|emb|CAB51073.1| DOMINA protein [Drosophila melanogaster] gi|7299331|gb|AAF54525.1| jumeau [Drosophila melanogaster] gi|7576440|dbj|BAA94598.1| Winged-helix nude transcription factor [Drosophila melanogaster] gi|9652084|gb|AAF91395.1| winged-he…	NP_524302, CAB51032, CAB51073, AAF54525, BAA94598, AAF91395, AAL28875	2.94e-08	67.2131	50.447	61	41	P:GO:0007391; P:GO:0007000; P:GO:0007476; F:GO:0000976; P:GO:0007400; P:GO:0035050; C:GO:0005730; P:GO:0006325; P:GO:0048749; P:GO:0008105; P:GO:0048813; C:GO:0005701; P:GO:0007517; P:GO:0051302; C:GO:0000791; P:GO:0050832	P:dorsal closure; P:nucleolus organization; P:imaginal disc-derived wing morphogenesis; F:transcription regulatory region sequence-specific DNA binding; P:neuroblast fate determination; P:embryonic heart tube development; C:nucleolus; P:chromatin organization; P:compound eye development; P:asymmetric protein localization; P:dendrite morphogenesis; C:polytene chromosome chromocenter; P:muscle orga…	no GO terms
TRINITY_GG_8240_c3_g1_i1	Lko057S000658	2	LOD1	Na(+)-dependent inorganic phosphate cotransporter [Drosophila melanogaster]	2934	gi|1524002|emb|CAA68992.1|Na(+)-dependent inorganic phosphate cotransporter [Drosophila melanogaster]	CAA68992	1.17e-87	53.9499	291.582	519	280	F:GO:0005436; P:GO:0006817; C:GO:0016020; C:GO:0044464; P:GO:0044699; P:GO:0009987	F:sodium:phosphate symporter activity; P:phosphate ion transport; C:membrane; C:cell part; P:single-organism process; P:cellular process	P:GO:0055085; C:GO:0016021
TRINITY_GG_8234_c2_g1_i1;TRINITY_GG_8234_c3_g1_i1	Lko057S000658	2	LOD1	notopleural	344	gi|161076432|ref|NP_610437.2|notopleural, isoform A [Drosophila melanogaster] gi|386767569|ref|NP_001246213.1| notopleural, isoform B [Drosophila melanogaster] gi|157400244|gb|AAF59007.2| notopleural, isoform A [Drosophila melanogaster] gi|383302353|gb|AFH07968.1| notopleural, isoform B [Drosophila melanogaster]	NP_610437, NP_001246213, AAF59007, AFH07968	4.22e-17	57.0093	76.2554	107	61	P:GO:0008063;P:GO:0035220;C:GO:0098595;P:GO:0007306;F:GO:0004252;P:GO:0016485;P:GO:0007343;C:GO:0005886;P:GO:0007313;P:GO:0051017	P:Tollsignalingpathway;P:wingdiscdevelopment;C:perivitellinespace;P:eggshellchorionassembly;F:serine-typeendopeptidaseactivity;P:proteinprocessing;P:eggactivation;C:plasmamembrane;P:maternalspecificationofdorsal/ventralaxis,oocyte,somaencoded;P:actinfilamentbundleassembly	P:GO:0006508;F:GO:0004252
TRINITY_GG_8240_c0_g1_i1;TRINITY_GG_8240_c4_g1_i1	Lko057S000658	2	LOD1	Prenyl-binding protein [Drosophila melanogaster]	1259	gi|19920966|ref|NP_609246.1|Prenyl-binding protein [Drosophila melanogaster] gi|74869766|sp|Q9VLJ0.1|PDE6D_DROME RecName: Full=Probable cGMP 3',5'-cyclic phosphodiesterase subunit delta; Short=DmPrBP gi|7297442|gb|AAF52700.1| Prenyl-binding protein [Drosophila melanogaster] gi|17945055|gb|AAL48589.1| RE06748p [Drosophila melanogaster] gi|17946696|gb|AAL49378.1| RH62806p [Drosophila melanogaster] …	NP_609246, Q9VLJ0, AAF52700, AAL48589, AAL49378, ANY27405	5.51e-25	84.127	100.908	63	53	C:GO:0005634;P:GO:0016319;P:GO:0007601;F:GO:0004114	C:nucleus;P:mushroombodydevelopment;P:visualperception;F:3',5'-cyclic-nucleotidephosphodiesteraseactivity	noGOterms;noIPSmatch
TRINITY_GG_8234_c0_g1_i1;TRINITY_GG_8254_c0_g1_i1;TRINITY_GG_8254_c4_g1_i1	Lko057S000658	2	LOD1	regucalcin	5127	gi|18860103|ref|NP_572775.1|regucalcin, isoform C [Drosophila melanogaster] gi|24641469|ref|NP_727586.1| regucalcin, isoform A [Drosophila melanogaster] gi|24641471|ref|NP_727587.1| regucalcin, isoform B [Drosophila melanogaster] gi|7292731|gb|AAF48128.1| regucalcin, isoform B [Drosophila melanogaster] gi|7292732|gb|AAF48129.1| regucalcin, isoform A [Drosophila melanogaster] gi|7292733|gb|AAF4813…	NP_572775, NP_727586, NP_727587, AAF48128, AAF48129, AAF48130, BAA99283, AAM50012	4.34e-64	57.9661	221.476	295	171	C:GO:0005811;C:GO:0005615;P:GO:0032504;P:GO:0090256;P:GO:0009631;P:GO:0044720;P:GO:0065007;P:GO:0007476	C:lipidparticle;C:extracellularspace;P:multicellularorganismreproduction;P:regulationofcellproliferationinvolvedinimaginaldisc-derivedwingmorphogenesis;P:coldacclimation;P:negativeregulationofimaginaldisc-derivedwingsize;P:biologicalregulation;P:imaginaldisc-derivedwingmorphogenesis	noGOterms;F:GO:0005509;F:GO:0030234
TRINITY_GG_8254_c2_g1_i1	Lko057S000658	2	LOD1	senescence marker protein-30	1058	gi|325559622|gb|ADZ30900.1|senescence marker protein-30, partial [Drosophila melanogaster] gi|325559624|gb|ADZ30901.1| senescence marker protein-30, partial [Drosophila melanogaster] gi|325559628|gb|ADZ30903.1| senescence marker protein-30, partial [Drosophila melanogaster] gi|325559634|gb|ADZ30906.1| senescence marker protein-30, partial [Drosophila melanogaster]	ADZ30900, ADZ30901, ADZ30903, ADZ30906	7.9e-07	59.6491	50.8322	57	34	P:GO:0090256; P:GO:0009631; P:GO:0044720	P:regulation of cell proliferation involved in imaginal disc-derived wing morphogenesis; P:cold acclimation; P:negative regulation of imaginal disc-derived wing size	no GO terms
TRINITY_GG_8235_c1_g1_i1	Lko057S000658	2	LOD1	shams [Drosophila melanogaster]	2373	gi|161078603|ref|NP_001097911.1|shams [Drosophila melanogaster] gi|158030380|gb|AAF56394.2| shams [Drosophila melanogaster] gi|162944842|gb|ABY20490.1| IP22168p [Drosophila melanogaster]	NP_001097911, AAF56394, ABY20490	2.96e-123	71.7391	375.17	322	231	F:GO:0042285; P:GO:0045746	F:xylosyltransferase activity; P:negative regulation of Notch signaling pathway	F:GO:0016757
TRINITY_GG_8254_c1_g1_i1	Lko057S000658	2	LOD1	Smp-30 protein [Drosophila melanogaster]	480	gi|298360884|gb|ADI78020.1|Smp-30 protein [Drosophila melanogaster]	ADI78020	5.63e-08	62.5	51.6026	64	40	P:GO:0090256; P:GO:0009631; P:GO:0044720	P:regulation of cell proliferation involved in imaginal disc-derived wing morphogenesis; P:cold acclimation; P:negative regulation of imaginal disc-derived wing size	no GO terms
TRINITY_GG_8254_c3_g1_i1	Lko057S000658	2	LOD1	Smp-30 protein [Drosophila melanogaster]	339	gi|298360766|gb|ADI77962.1|Smp-30 protein [Drosophila melanogaster] gi|298360961|gb|ADI78058.1| Smp-30 protein [Drosophila melanogaster]	ADI77962, ADI78058	1.37e-12	47.7064	62.7734	109	52	P:GO:0090256; F:GO:0005509; C:GO:0005829; P:GO:0009631; P:GO:0044720	P:regulation of cell proliferation involved in imaginal disc-derived wing morphogenesis; F:calcium ion binding; C:cytosol; P:cold acclimation; P:negative regulation of imaginal disc-derived wing size	no GO terms
TRINITY_GG_8253_c8_g1_i1	Lko057S000658	2	LOD1	unnamed protein product [Drosophila melanogaster]	252	gi|8823|emb|CAA35587.1|unnamed protein product [Drosophila melanogaster]	CAA35587	5.96e-17	69.4915	74.3294	59	41			no GO terms
TRINITY_GG_8246_c0_g1_i1	Lko057S000658	2	LOD1	upSET	8976	gi|24664023|ref|NP_648681.1|upSET, isoform A [Drosophila melanogaster] gi|442632221|ref|NP_001261819.1| upSET, isoform B [Drosophila melanogaster] gi|23093516|gb|AAF49773.3| upSET, isoform A [Drosophila melanogaster] gi|440215758|gb|AGB94512.1| upSET, isoform B [Drosophila melanogaster]	NP_648681, NP_001261819, AAF49773, AGB94512	6.31e-33	48.583	142.51	247	120	F:GO:0042800; P:GO:0007095; F:GO:0035035; P:GO:0061086; F:GO:0046974; F:GO:0046975; P:GO:0022008; P:GO:0045944; C:GO:0044545; F:GO:0042799; P:GO:0010906; C:GO:0005705; P:GO:0001700; P:GO:0097676; P:GO:0048477; C:GO:0035327; P:GO:0018991; P:GO:0048096; P:GO:0051568	F:histone methyltransferase activity (H3-K4 specific); P:mitotic G2 DNA damage checkpoint; F:histone acetyltransferase binding; P:negative regulation of histone H3-K27 methylation; F:histone methyltransferase activity (H3-K9 specific); F:histone methyltransferase activity (H3-K36 specific); P:neurogenesis; P:positive regulation of transcription from RNA polymerase II promoter; C:NSL complex; F:hi…	F:GO:0005515
TRINITY_GG_1695_c31_g1_i1	Lko057S001056	2	LOD1	AF254741_1Centaurin Gamma 1A [Drosophila melanogaster]	292	gi|7650487|gb|AAF66064.1|AF254741_1Centaurin Gamma 1A [Drosophila melanogaster]	AAF66064	2.19e-14	79.0698	67.781	43	34	F:GO:0005525; P:GO:0007264; F:GO:0003924; C:GO:0016020; F:GO:0005096; P:GO:0072375; P:GO:0043547	F:GTP binding; P:small GTPase mediated signal transduction; F:GTPase activity; C:membrane; F:GTPase activator activity; P:medium-term memory; P:positive regulation of GTPase activity	F:GO:0005515
TRINITY_GG_1695_c2_g1_i1;TRINITY_GG_1695_c2_g1_i2;TRINITY_GG_1695_c29_g1_i1;TRINITY_GG_1695_c30_g1_i1	Lko057S001056	2	LOD1	centaurin gamma 1A	3485	gi|24584224|ref|NP_523562.2|centaurin gamma 1A, isoform A [Drosophila melanogaster] gi|21483390|gb|AAM52670.1| LD11783p [Drosophila melanogaster] gi|22946443|gb|AAF53349.2| centaurin gamma 1A, isoform A [Drosophila melanogaster]	NP_523562, AAM52670, AAF53349	3.25e-18	87.7551	91.6633	49	43	F:GO:0005525;P:GO:0007264;F:GO:0003924;C:GO:0016020;F:GO:0005096;P:GO:0072375;P:GO:0043547	F:GTPbinding;P:smallGTPasemediatedsignaltransduction;F:GTPaseactivity;C:membrane;F:GTPaseactivatoractivity;P:medium-termmemory;P:positiveregulationofGTPaseactivity	noGOterms
TRINITY_GG_1693_c0_g1_i1	Lko057S001056	2	LOD1	RE07016p [Drosophila melanogaster]	236	gi|28317046|gb|AAO39542.1|RE07016p [Drosophila melanogaster]	AAO39542	9.32e-21	88.4615	85.1149	52	46	F:GO:0005525; P:GO:0007264; F:GO:0003924; C:GO:0016020; F:GO:0005096; P:GO:0072375; P:GO:0043547	F:GTP binding; P:small GTPase mediated signal transduction; F:GTPase activity; C:membrane; F:GTPase activator activity; P:medium-term memory; P:positive regulation of GTPase activity	no IPS match
TRINITY_GG_1695_c22_g1_i1	Lko057S001056	2	LOD1	RE36656p [Drosophila melanogaster]	427	gi|47271204|gb|AAT27272.1|RE36656p [Drosophila melanogaster]	AAT27272	9.1e-64	81.6901	206.453	142	116	P:GO:0007264; P:GO:0000902; F:GO:0005096; F:GO:0005543; P:GO:0043547; F:GO:0005525; C:GO:0005912; C:GO:0005737; P:GO:0001745; F:GO:0003924; C:GO:0016020; P:GO:0046331; P:GO:0072375; P:GO:0006909	P:small GTPase mediated signal transduction; P:cell morphogenesis; F:GTPase activator activity; F:phospholipid binding; P:positive regulation of GTPase activity; F:GTP binding; C:adherens junction; C:cytoplasm; P:compound eye morphogenesis; F:GTPase activity; C:membrane; P:lateral inhibition; P:medium-term memory; P:phagocytosis	F:GO:0005096
TRINITY_GG_1695_c0_g1_i1	Lko057S001056	2	LOD1	RH02901p [Drosophila melanogaster]	1528	gi|17944453|gb|AAL48116.1|RH02901p [Drosophila melanogaster]	AAL48116	4.23e-51	58.0153	181.415	262	152	F:GO:0008289	F:lipid binding	no GO terms
TRINITY_GG_1696_c0_g1_i1	Lko057S001056	2	LOD1	uncharacterized protein Dmel_CG34283 [Drosophila melanogaster]	1481	gi|161078390|ref|NP_001097831.1|uncharacterized protein Dmel_CG34283 [Drosophila melanogaster] gi|158030299|gb|ABW08698.1| uncharacterized protein Dmel_CG34283 [Drosophila melanogaster] gi|284925175|gb|ADC27607.1| MIP16764p [Drosophila melanogaster] gi|1049303457|gb|ANY27812.1| GEO02364p1, partial [Drosophila melanogaster]	NP_001097831, ABW08698, ADC27607, ANY27812	1.96e-15	48.9655	74.7146	145	71	P:GO:0010629; P:GO:0044763; P:GO:0055070	P:negative regulation of gene expression; P:single-organism cellular process; P:copper ion homeostasis	F:GO:0003676
TRINITY_GG_3936_c0_g1_i1	Lko057S001522	2	LOD1	protein phosphatase 1 regulatory subunit 15 [Drosophila melanogaster]	3854	gi|19922868|ref|NP_611863.1|protein phosphatase 1 regulatory subunit 15 [Drosophila melanogaster] gi|7291702|gb|AAF47124.1| protein phosphatase 1 regulatory subunit 15 [Drosophila melanogaster] gi|15291211|gb|AAK92874.1| GH11727p [Drosophila melanogaster] gi|115501955|emb|CAK18656.1| growth arrest and DNA damage 34 homologue [Drosophila melanogaster]	NP_611863, AAF47124, AAK92874, CAK18656	3.56e-08	53.8462	57.7658	91	49	F:GO:0008157; C:GO:0005783	F:protein phosphatase 1 binding; C:endoplasmic reticulum	no GO terms
TRINITY_GG_3935_c2_g1_i1	Lko057S001522	2	LOD1	Ran	992	gi|21356159|ref|NP_651969.1|Ran, isoform A [Drosophila melanogaster] gi|24641219|ref|NP_727499.1| Ran, isoform B [Drosophila melanogaster] gi|665390692|ref|NP_001285111.1| Ran, isoform C [Drosophila melanogaster] gi|665390694|ref|NP_001285112.1| Ran, isoform D [Drosophila melanogaster] gi|50400799|sp|Q9VZ23.1|RAN_DROME RecName: Full=GTP-binding nuclear protein Ran; AltName: Full=Ras-related nucle…	NP_651969, NP_727499, NP_001285111, NP_001285112, Q9VZ23, AAF60289, AAF48008, AAL28946, AAL48004, AAN09287, AAO39578, AHN59581, AHN59582	3.49e-23	51.3158	96.2857	152	78	P:GO:0045926; P:GO:0007293; P:GO:0043900; P:GO:1903047; P:GO:0060560; C:GO:0045202; P:GO:0044087; P:GO:0001745; P:GO:0099504; P:GO:0007409; P:GO:0030707; P:GO:0061640; P:GO:0050807; P:GO:0007264; P:GO:0032880; P:GO:0000226; P:GO:0048523; P:GO:0006897; P:GO:0044765; C:GO:0005886; F:GO:0005515; C:GO:0097458; P:GO:0016049; P:GO:0051656; P:GO:0007391; P:GO:0008360; P:GO:0035220; P:GO:0060341; P:GO:00…	P:negative regulation of growth; P:germarium-derived egg chamber formation; P:regulation of multi-organism process; P:mitotic cell cycle process; P:developmental growth involved in morphogenesis; C:synapse; P:regulation of cellular component biogenesis; P:compound eye morphogenesis; P:synaptic vesicle cycle; P:axonogenesis; P:ovarian follicle cell development; P:cytoskeleton-dependent cytokinesis…	F:GO:0005525; F:GO:0003924
TRINITY_GG_3935_c0_g1_i1;TRINITY_GG_3935_c1_g1_i1;TRINITY_GG_3935_c3_g1_i1	Lko057S001522	2	LOD1	subdued	1905	gi|24648228|ref|NP_732439.1|subdued, isoform B [Drosophila melanogaster] gi|442619946|ref|NP_001262736.1| subdued, isoform E [Drosophila melanogaster] gi|23171735|gb|AAN13804.1| subdued, isoform B [Drosophila melanogaster] gi|440217629|gb|AGB96116.1| subdued, isoform E [Drosophila melanogaster]	NP_732439, NP_001262736, AAN13804, AGB96116	2.71e-118	71.2707	375.17	362	258	F:GO:0005229;P:GO:0050829;F:GO:0097603;P:GO:0006821;P:GO:0050965;F:GO:0005247	F:intracellularcalciumactivatedchloridechannelactivity;P:defenseresponsetoGram-negativebacterium;F:temperature-gatedionchannelactivity;P:chloridetransport;P:detectionoftemperaturestimulusinvolvedinsensoryperceptionofpain;F:voltage-gatedchloridechannelactivity	noGOterms;F:GO:0046983
TRINITY_GG_4290_c3_g1_i1	Lko057S001589	2	LOD1	crooked legs	285	gi|442627505|ref|NP_001260391.1|crooked legs, isoform G [Drosophila melanogaster] gi|440213716|gb|AGB92926.1| crooked legs, isoform G [Drosophila melanogaster]	NP_001260391, AGB92926	2.42e-06	53.0864	44.669	81	43	F:GO:0008270; P:GO:0007476; P:GO:0007155; P:GO:0045931; P:GO:0048813; P:GO:0006357; F:GO:0003676; P:GO:0031935; C:GO:0005876; C:GO:0005634; P:GO:0045892; C:GO:0005737; F:GO:0046872; P:GO:0046331; P:GO:0030178	F:zinc ion binding; P:imaginal disc-derived wing morphogenesis; P:cell adhesion; P:positive regulation of mitotic cell cycle; P:dendrite morphogenesis; P:regulation of transcription from RNA polymerase II promoter; F:nucleic acid binding; P:regulation of chromatin silencing; C:spindle microtubule; C:nucleus; P:negative regulation of transcription, DNA-templated; C:cytoplasm; F:metal ion binding; …	F:GO:0003676
TRINITY_GG_4292_c1_g1_i1	Lko057S001589	2	LOD1	cytochrome P450-4c3 [Drosophila melanogaster]	5190	gi|17864130|ref|NP_524598.1|cytochrome P450-4c3 [Drosophila melanogaster] gi|12643918|sp|Q9VA27.1|CP4C3_DROME RecName: Full=Cytochrome P450 4c3; AltName: Full=CYPIVC3 gi|7301993|gb|AAF57098.1| cytochrome P450-4c3 [Drosophila melanogaster] gi|33589621|gb|AAQ22577.1| GH05994p [Drosophila melanogaster]	NP_524598, Q9VA27, AAF57098, AAQ22577	2.02e-142	64.9425	452.21	522	339	C:GO:0005811	C:lipid particle	F:GO:0005506; F:GO:0016705; P:GO:0055114; F:GO:0020037
TRINITY_GG_4292_c2_g1_i1	Lko057S001589	2	LOD1	EG:152A3.4 [Drosophila melanogaster]	220	gi|2894114|emb|CAA15698.1|EG:152A3.4 [Drosophila melanogaster]	CAA15698	0.000195	49.2308	38.5058	65	32	F:GO:0005506; F:GO:0016705; P:GO:0055114; F:GO:0020037	F:iron ion binding; F:oxidoreductase activity, acting on paired donors, with incorporation or reduction of molecular oxygen; P:oxidation-reduction process; F:heme binding	F:GO:0016705; F:GO:0005506; P:GO:0055114; F:GO:0020037
TRINITY_GG_4290_c0_g1_i1	Lko057S001589	2	LOD1	MIP04344p [Drosophila melanogaster]	299	gi|330864891|gb|AEC46901.1|MIP04344p [Drosophila melanogaster]	AEC46901	6.57e-05	54.902	40.817	51	28	F:GO:0008270; P:GO:0010780; P:GO:0035041; P:GO:0007143; P:GO:1902275; C:GO:0000228; P:GO:0007276; F:GO:0043565; P:GO:0048666; F:GO:0003682; P:GO:0007126; P:GO:0006357; F:GO:0003676; C:GO:0005634; C:GO:0000790; C:GO:0005737; F:GO:0046872; P:GO:0010705; P:GO:0006909	F:zinc ion binding; P:meiotic DNA double-strand break formation involved in reciprocal meiotic recombination; P:sperm chromatin decondensation; P:female meiotic division; P:regulation of chromatin organization; C:nuclear chromosome; P:gamete generation; F:sequence-specific DNA binding; P:neuron development; F:chromatin binding; P:meiotic nuclear division; P:regulation of transcription from RNA po…	F:GO:0003676
TRINITY_GG_4293_c1_g1_i1	Lko057S001589	2	LOD1	spaghetti [Drosophila melanogaster]	2483	gi|17864228|ref|NP_524664.1|spaghetti [Drosophila melanogaster] gi|7242524|emb|CAB64598.2| spaghetti [Drosophila melanogaster] gi|7291754|gb|AAF47175.1| spaghetti [Drosophila melanogaster] gi|559767256|gb|AHB12554.1| FI17138p1 [Drosophila melanogaster]	NP_524664, CAB64598, AAF47175, AHB12554	1.65e-20	39.4366	97.0561	497	196	P:GO:0008283; P:GO:0035167; P:GO:0007455; P:GO:1903646; P:GO:0007298; P:GO:0006468; P:GO:0000278; P:GO:0007259; P:GO:0006955; P:GO:0045475; C:GO:0005829; P:GO:0051607; P:GO:0017145; P:GO:0016476; F:GO:0031072; P:GO:0019827; P:GO:0016318; P:GO:0060031; P:GO:0032460; P:GO:0045610; P:GO:0003383; P:GO:0042386; P:GO:0046425; F:GO:0004672; P:GO:0007365; P:GO:0007442; P:GO:0045317; P:GO:0007424; P:GO:00…	P:cell proliferation; P:larval lymph gland hemopoiesis; P:eye-antennal disc morphogenesis; P:positive regulation of chaperone-mediated protein folding; P:border follicle cell migration; P:protein phosphorylation; P:mitotic cell cycle; P:JAK-STAT cascade; P:immune response; P:locomotor rhythm; C:cytosol; P:defense response to virus; P:stem cell division; P:regulation of embryonic cell shape; F:hea…	F:GO:0005515
TRINITY_GG_4291_c0_g1_i1;TRINITY_GG_4291_c0_g1_i2;TRINITY_GG_4291_c0_g1_i3;TRINITY_GG_4291_c0_g1_i4	Lko057S001589	2	LOD1	uncharacterized protein Dmel_CG10737	4996	gi|665402071|ref|NP_001286603.1|uncharacterized protein Dmel_CG10737, isoform W [Drosophila melanogaster] gi|599127151|gb|AHN56398.1| uncharacterized protein Dmel_CG10737, isoform W [Drosophila melanogaster]	NP_001286603, AHN56398	3.84e-127	58.5443	419.853	632	370	C:GO:0016327;C:GO:0035003;P:GO:0007294;P:GO:0051491;P:GO:0007430;P:GO:0006468;P:GO:0007613;P:GO:0060446;P:GO:0007314;P:GO:0007309;F:GO:0005524;P:GO:0045196;P:GO:0045197;P:GO:0045176;P:GO:0045198;F:GO:0017022;P:GO:0030860;P:GO:0016332;P:GO:0016334;P:GO:0035556;P:GO:0051601;P:GO:0010592;P:GO:0035011;P:GO:0007043;P:GO:0007283;P:GO:0007163;P:GO:0003382;P:GO:0002052;P:GO:0046667;C:GO:0045179;P:GO:0090…	C:apicolateralplasmamembrane;C:subapicalcomplex;P:germarium-derivedoocytefatedetermination;P:positiveregulationoffilopodiumassembly;P:terminalbranching,opentrachealsystem;P:proteinphosphorylation;P:memory;P:branchinginvolvedinopentrachealsystemdevelopment;P:oocyteanterior/posterioraxisspecification;P:oocyteaxisspecification;F:ATPbinding;P:establishmentormaintenanceofneuroblastpolarity;P:establish…	P:GO:0035556
TRINITY_GG_8987_c0_g1_i1	Lko057S001990	2	LOD1	AT19278p [Drosophila melanogaster]	2466	gi|18447018|gb|AAL68100.1|AT19278p [Drosophila melanogaster]	AAL68100	3.97e-105	78.1955	333.183	266	208	P:GO:0035220; P:GO:0006508; F:GO:0004252; P:GO:0048812; P:GO:0009620; P:GO:0051017	P:wing disc development; P:proteolysis; F:serine-type endopeptidase activity; P:neuron projection morphogenesis; P:response to fungus; P:actin filament bundle assembly	P:GO:0006508; F:GO:0004252
TRINITY_GG_8983_c6_g1_i1;TRINITY_GG_8983_c8_g1_i1	Lko057S001990	2	LOD1	cardinal [Drosophila melanogaster]	1364	gi|24649111|ref|NP_651081.1|cardinal [Drosophila melanogaster] gi|7300903|gb|AAF56043.1| cardinal [Drosophila melanogaster]	NP_651081, AAF56043	1.76e-151	69.9346	451.825	459	321	P:GO:0070189;P:GO:0006727;P:GO:0016043;P:GO:0060967;P:GO:0007304;P:GO:1901216;C:GO:0005764;F:GO:0004601;P:GO:0006979;P:GO:0055114;F:GO:0020037	P:kynureninemetabolicprocess;P:ommochromebiosyntheticprocess;P:cellularcomponentorganization;P:negativeregulationofgenesilencingbyRNA;P:chorion-containingeggshellformation;P:positiveregulationofneurondeath;C:lysosome;F:peroxidaseactivity;P:responsetooxidativestress;P:oxidation-reductionprocess;F:hemebinding	F:GO:0004601;P:GO:0006979;P:GO:0055114;F:GO:0020037;noGOterms
TRINITY_GG_8989_c3_g1_i1	Lko057S001990	2	LOD1	CCR4-NOT transcription complex subunit 11	1692	gi|24762515|ref|NP_611874.1|CCR4-NOT transcription complex subunit 11, isoform B [Drosophila melanogaster] gi|665403328|ref|NP_001286813.1| CCR4-NOT transcription complex subunit 11, isoform C [Drosophila melanogaster] gi|21626712|gb|AAF47144.3| CCR4-NOT transcription complex subunit 11, isoform B [Drosophila melanogaster] gi|85857596|gb|ABC86333.1| IP14867p [Drosophila melanogaster] gi|599127398…	NP_611874, NP_001286813, AAF47144, ABC86333, AHN56608	2.66e-86	75.6522	267.7	230	174	P:GO:0006402; C:GO:0030014; P:GO:0017148	P:mRNA catabolic process; C:CCR4-NOT complex; P:negative regulation of translation	C:GO:0030014
TRINITY_GG_8983_c1_g1_i1	Lko057S001990	2	LOD1	CG4593	994	gi|24640291|ref|NP_572377.2|CG4593, isoform A [Drosophila melanogaster] gi|665390093|ref|NP_001284975.1| CG4593, isoform B [Drosophila melanogaster] gi|7290790|gb|AAF46235.1| CG4593, isoform A [Drosophila melanogaster] gi|194353364|emb|CAQ53474.1| CG4593-PA [Drosophila melanogaster] gi|194353366|emb|CAQ53475.1| CG4593-PA [Drosophila melanogaster] gi|194353368|emb|CAQ53476.1| CG4593-PA [Drosophila…	NP_572377, NP_001284975, AAF46235, CAQ53474, CAQ53475, CAQ53476, CAQ53477, CAQ53478, CAQ53479, CAQ53480, CAQ53481, CAQ53482, CAQ53483, CAQ53484, CAQ53485, ACH92181, CAR94156, CAR94157, CAR94158, CAR94159, CAR94160, CAR94161, CAR94162, CAR94163, CAR94164, CAR94165, CAR94166, CAR94167, AHN59446	3.81e-79	83.3333	241.121	198	165	P:GO:0022008	P:neurogenesis	no GO terms
TRINITY_GG_8986_c3_g1_i1	Lko057S001990	2	LOD1	CG6847	1019	gi|45549581|ref|NP_573259.2|CG6847, isoform A [Drosophila melanogaster] gi|665392159|ref|NP_001285397.1| CG6847, isoform B [Drosophila melanogaster] gi|45447038|gb|AAF48784.2| CG6847, isoform A [Drosophila melanogaster] gi|545746522|gb|AGW52193.1| FI22312p1 [Drosophila melanogaster] gi|599138135|gb|AHN59867.1| CG6847, isoform B [Drosophila melanogaster]	NP_573259, NP_001285397, AAF48784, AGW52193, AHN59867	3.88e-48	53.0488	174.481	328	174	P:GO:0048731; F:GO:0016298	P:system development; F:lipase activity	F:GO:0052689
TRINITY_GG_8986_c0_g1_i1	Lko057S001990	2	LOD1	CG8963	2134	gi|665401508|ref|NP_001246380.2|CG8963, isoform E [Drosophila melanogaster] gi|599127054|gb|AFH08133.2| CG8963, isoform E [Drosophila melanogaster]	NP_001246380, AFH08133	8.81e-22	45.5939	100.523	261	119	P:GO:0007610	P:behavior	F:GO:0003723; F:GO:0005515; F:GO:0005488
TRINITY_GG_8984_c1_g1_i1;TRINITY_GG_8984_c1_g1_i2;TRINITY_GG_8984_c1_g1_i3;TRINITY_GG_8984_c1_g1_i4	Lko057S001990	2	LOD1	chloride channel-b [Drosophila melanogaster]	6956	gi|19922112|ref|NP_610798.1|chloride channel-b [Drosophila melanogaster] gi|7303432|gb|AAF58489.1| chloride channel-b [Drosophila melanogaster] gi|17946327|gb|AAL49203.1| RE63672p [Drosophila melanogaster]	NP_610798, AAF58489, AAL49203	3.75e-179	69.4656	570.081	655	455	P:GO:1902476;C:GO:0005770;P:GO:0048878;F:GO:0005254;P:GO:0050975;P:GO:0044765;P:GO:0003014;C:GO:0005764;C:GO:0044459;C:GO:0016020;P:GO:0044699	P:chloridetransmembranetransport;C:lateendosome;P:chemicalhomeostasis;F:chloridechannelactivity;P:sensoryperceptionoftouch;P:single-organismtransport;P:renalsystemprocess;C:lysosome;C:plasmamembranepart;C:membrane;P:single-organismprocess	F:GO:0005488
TRINITY_GG_8989_c2_g1_i1	Lko057S001990	2	LOD1	glucosidase 2 beta subunit	3517	gi|19921464|ref|NP_609844.1|glucosidase 2 beta subunit, isoform A [Drosophila melanogaster] gi|386769761|ref|NP_001246063.1| glucosidase 2 beta subunit, isoform B [Drosophila melanogaster] gi|7298396|gb|AAF53621.1| glucosidase 2 beta subunit, isoform A [Drosophila melanogaster] gi|16198255|gb|AAL13954.1| LD46533p [Drosophila melanogaster] gi|383291540|gb|AFH03737.1| glucosidase 2 beta subunit, is…	NP_609844, NP_001246063, AAF53621, AAL13954, AFH03737	4.73e-125	60.0375	396.356	533	320	P:GO:0008360; P:GO:0010592; C:GO:0031209; P:GO:0008582; P:GO:0046331; P:GO:0051491; C:GO:0012505; P:GO:0007015; F:GO:0032403; P:GO:0021551; P:GO:0051259	P:regulation of cell shape; P:positive regulation of lamellipodium assembly; C:SCAR complex; P:regulation of synaptic growth at neuromuscular junction; P:lateral inhibition; P:positive regulation of filopodium assembly; C:endomembrane system; P:actin filament organization; F:protein complex binding; P:central nervous system morphogenesis; P:protein oligomerization	F:GO:0005509
TRINITY_GG_8983_c3_g1_i1	Lko057S001990	2	LOD1	greatwall	3163	gi|442619847|ref|NP_001262713.1|greatwall, isoform B [Drosophila melanogaster] gi|440217604|gb|AGB96093.1| greatwall, isoform B [Drosophila melanogaster]	NP_001262713, AGB96093	1.71e-153	55.2666	476.863	769	425	P:GO:2000040; P:GO:0042771; P:GO:0007298; P:GO:0008306; F:GO:0008227; C:GO:0030425; P:GO:0000022; P:GO:0045570; F:GO:0001588; P:GO:1901739; P:GO:0045892; P:GO:0010579; C:GO:0030424; P:GO:0010212; P:GO:0090303; P:GO:0035075; P:GO:0030261; P:GO:0035191; P:GO:0042067; P:GO:0048800; C:GO:0045179; P:GO:0003384; P:GO:0007144; P:GO:0060439; P:GO:0007266; P:GO:0009047; P:GO:0046621; F:GO:0004674; P:GO:00…	P:regulation of planar cell polarity pathway involved in axis elongation; P:intrinsic apoptotic signaling pathway in response to DNA damage by p53 class mediator; P:border follicle cell migration; P:associative learning; F:G-protein coupled amine receptor activity; C:dendrite; P:mitotic spindle elongation; P:regulation of imaginal disc growth; F:dopamine neurotransmitter receptor activity, couple…	F:GO:0005524; F:GO:0004672; P:GO:0006468; F:GO:0004674
TRINITY_GG_8983_c2_g1_i1	Lko057S001990	2	LOD1	haem peroxidase [Nilaparvata lugens]	6968	gi|1214786057|gb|ASK06160.1|haem peroxidase [Nilaparvata lugens]	ASK06160	7.21e-71	39.1703	275.018	2073	812			no IPS match
TRINITY_GG_8983_c4_g1_i1	Lko057S001990	2	LOD1	hypothetical protein TcasGA2_TC030917 [Tribolium castaneum]	1779	gi|1004173517|gb|KXZ75890.1|hypothetical protein TcasGA2_TC030917 [Tribolium castaneum]	KXZ75890	1.64e-12	64.5833	78.1814	96	62	F:GO:0003964; F:GO:0003723; P:GO:0006278	F:RNA-directed DNA polymerase activity; F:RNA binding; P:RNA-dependent DNA biosynthetic process	no IPS match
TRINITY_GG_8986_c2_g1_i1	Lko057S001990	2	LOD1	IP21909p	532	gi|159884125|gb|ABX00741.1|IP21909p, partial [Drosophila melanogaster]	ABX00741	6.48e-40	94.5205	132.88	73	69	P:GO:0006805; C:GO:0005829; F:GO:0008146; P:GO:0051923; P:GO:0042742	P:xenobiotic metabolic process; C:cytosol; F:sulfotransferase activity; P:sulfation; P:defense response to bacterium	no IPS match
TRINITY_GG_8984_c0_g1_i1;TRINITY_GG_8984_c2_g1_i1	Lko057S001990	2	LOD1	lethal (3) 07882	1383	gi|24647702|ref|NP_652040.2|lethal (3) 07882, isoform A [Drosophila melanogaster] gi|939620300|ref|NP_001303435.1| lethal (3) 07882, isoform B [Drosophila melanogaster] gi|74947836|sp|Q9VEJ2.2|NOP14_DROME RecName: Full=Nucleolar protein 14 homolog; AltName: Full=Nucleolar complex protein 14 homolog gi|21429048|gb|AAM50243.1| LD15947p [Drosophila melanogaster] gi|23171563|gb|AAF55429.2| lethal (3)…	NP_652040, NP_001303435, Q9VEJ2, AAM50243, AAF55429, ALI30583	8.46e-49	61.8297	179.874	317	196	C:GO:0032040;F:GO:0030515;P:GO:0042274;P:GO:0006364;C:GO:0005730	C:small-subunitprocessome;F:snoRNAbinding;P:ribosomalsmallsubunitbiogenesis;P:rRNAprocessing;C:nucleolus	C:GO:0032040
TRINITY_GG_8986_c11_g1_i1	Lko057S001990	2	LOD1	Pancreatic lipase-related protein 2 [Zootermopsis nevadensis]	289	gi|646718719|gb|KDR21088.1|Pancreatic lipase-related protein 2 [Zootermopsis nevadensis]	KDR21088	3.9e-30	75.2809	116.701	89	67	F:GO:0008308; P:GO:1903959; P:GO:0055085; F:GO:0004806; C:GO:0005576; C:GO:0005741; P:GO:0006820; F:GO:0052689; P:GO:0044070; F:GO:0016787	F:voltage-gated anion channel activity; P:regulation of anion transmembrane transport; P:transmembrane transport; F:triglyceride lipase activity; C:extracellular region; C:mitochondrial outer membrane; P:anion transport; F:carboxylic ester hydrolase activity; P:regulation of anion transport; F:hydrolase activity	no IPS match
TRINITY_GG_8985_c0_g1_i1	Lko057S001990	2	LOD1	peptidyl-alpha-hydroxyglycine alpha-amidating lyase [Drosophila melanogaster]	1898	gi|12000353|gb|AAG01895.1|peptidyl-alpha-hydroxyglycine alpha-amidating lyase [Drosophila melanogaster]	AAG01895	1.41e-103	65.9306	321.242	317	209	P:GO:0044719; C:GO:0043025; C:GO:0005576; P:GO:0044237; F:GO:0004598	P:regulation of imaginal disc-derived wing size; C:neuronal cell body; C:extracellular region; P:cellular metabolic process; F:peptidylamidoglycolate lyase activity	F:GO:0005515
TRINITY_GG_8989_c1_g1_i1	Lko057S001990	2	LOD1	PO22_POPJA Retrovirus-related Pol polyprotein from type-1 retrotransposable element R2 (Fragment) OS=Popillia japonica PE=3 SV=1	2651	gnl|BL_ORD_ID|16883sp|Q03274|PO22_POPJA Retrovirus-related Pol polyprotein from type-1 retrotransposable element R2 (Fragment) OS=Popillia japonica PE=3 SV=1	16883	1.84e-05	52.9851	48.1358	134	71			no IPS match
TRINITY_GG_8988_c0_g1_i1	Lko057S001990	2	LOD1	PREDICTED: growth arrest-specific protein 1-like [Agrilus planipennis]	1032	gi|1069801495|ref|XP_018325217.1|PREDICTED: growth arrest-specific protein 1-like [Agrilus planipennis] gi|1069801497|ref|XP_018325218.1| PREDICTED: growth arrest-specific protein 1-like [Agrilus planipennis] gi|1069801499|ref|XP_018325219.1| PREDICTED: growth arrest-specific protein 1-like [Agrilus planipennis]	XP_018325217, XP_018325218, XP_018325219	8e-66	68.8442	215.698	199	137	C:GO:0016020	C:membrane	no GO terms
TRINITY_GG_8986_c13_g1_i1	Lko057S001990	2	LOD1	PREDICTED: pancreatic triacylglycerol lipase [Acyrthosiphon pisum]	419	gi|328709107|ref|XP_003243872.1|PREDICTED: pancreatic triacylglycerol lipase [Acyrthosiphon pisum]	XP_003243872	1.5e-10	62.1212	65.4698	66	41	F:GO:0008308; P:GO:1903959; P:GO:0055085; C:GO:0005741; C:GO:0005576; P:GO:0006820; F:GO:0052689; P:GO:0044070	F:voltage-gated anion channel activity; P:regulation of anion transmembrane transport; P:transmembrane transport; C:mitochondrial outer membrane; C:extracellular region; P:anion transport; F:carboxylic ester hydrolase activity; P:regulation of anion transport	no IPS match
TRINITY_GG_8989_c0_g1_i1	Lko057S001990	2	LOD1	Ras oncogene at 85D [Drosophila melanogaster]	2844	gi|17136430|ref|NP_476699.1|Ras oncogene at 85D [Drosophila melanogaster] gi|131859|sp|P08646.2|RAS1_DROME RecName: Full=Ras-like protein 1; Short=Dras1; AltName: Full=Dmras85D; Flags: Precursor gi|6531630|gb|AAF15514.1|AF186648_1 Ras1 [Drosophila melanogaster] gi|158205|gb|AAA28847.1| Dras1 protein [Drosophila melanogaster] gi|7299191|gb|AAF54388.1| Ras oncogene at 85D [Drosophila melanogaster] …	NP_476699, P08646, AAF15514, AAA28847, AAF54388, AAL90279, AAM11241	1.43e-86	94.3396	276.174	159	150	P:GO:0035088; P:GO:0045727; P:GO:0008340; P:GO:0022409; P:GO:0046534; P:GO:0007411; P:GO:0007455; P:GO:0042254; P:GO:0042331; P:GO:0007298; P:GO:0008586; P:GO:0002168; P:GO:0030307; P:GO:0051124; F:GO:0003924; P:GO:0045176; P:GO:0032486; P:GO:0001708; P:GO:0001709; P:GO:0032008; P:GO:0008595; P:GO:0030381; P:GO:0008594; P:GO:0008593; P:GO:0006970; P:GO:0045610; P:GO:0007422; P:GO:0060438; P:GO:00…	P:establishment or maintenance of apical/basal cell polarity; P:positive regulation of translation; P:determination of adult lifespan; P:positive regulation of cell-cell adhesion; P:positive regulation of photoreceptor cell differentiation; P:axon guidance; P:eye-antennal disc morphogenesis; P:ribosome biogenesis; P:phototaxis; P:border follicle cell migration; P:imaginal disc-derived wing vein m…	F:GO:0005525; P:GO:0007165; F:GO:0003924; C:GO:0016020
TRINITY_GG_8983_c0_g1_i1	Lko057S001990	2	LOD1	tRNA-guanine transglycosylase [Drosophila melanogaster]	3434	gi|19920510|ref|NP_608585.1|tRNA-guanine transglycosylase [Drosophila melanogaster] gi|8928447|sp|Q9VPY8.1|TGT_DROME RecName: Full=Queuine tRNA-ribosyltransferase catalytic subunit; AltName: Full=Guanine insertion enzyme; AltName: Full=tRNA-guanine transglycosylase gi|7296102|gb|AAF51396.1| tRNA-guanine transglycosylase [Drosophila melanogaster] gi|15292377|gb|AAK93457.1| LP01967p [Drosophila mel…	NP_608585, Q9VPY8, AAF51396, AAK93457	0	79.6392	558.525	388	309	P:GO:0008616; P:GO:0006400; F:GO:0008479	P:queuosine biosynthetic process; P:tRNA modification; F:queuine tRNA-ribosyltransferase activity	F:GO:0016763; P:GO:0101030; P:GO:0006400; F:GO:0008479
TRINITY_GG_8983_c9_g1_i1	Lko057S001990	2	LOD1	uncharacterized protein Dmel_CG10211	533	gi|19921482|ref|NP_609883.1|uncharacterized protein Dmel_CG10211, isoform A [Drosophila melanogaster] gi|665408535|ref|NP_001286043.1| uncharacterized protein Dmel_CG10211, isoform B [Drosophila melanogaster] gi|15292215|gb|AAK93376.1| LD42267p [Drosophila melanogaster] gi|22946755|gb|AAF53674.3| uncharacterized protein Dmel_CG10211, isoform A [Drosophila melanogaster] gi|599125532|gb|AHN54557.1|…	NP_609883, NP_001286043, AAK93376, AAF53674, AHN54557	3.51e-32	68.0328	122.479	122	83	P:GO:0022008; P:GO:0060967; P:GO:0007304; P:GO:1901216; C:GO:0005875; C:GO:0042600; C:GO:0005764; P:GO:0045471; F:GO:0016491; P:GO:0070189; P:GO:0006727; P:GO:0001516; P:GO:0006909; P:GO:0016043	P:neurogenesis; P:negative regulation of gene silencing by RNA; P:chorion-containing eggshell formation; P:positive regulation of neuron death; C:microtubule associated complex; C:chorion; C:lysosome; P:response to ethanol; F:oxidoreductase activity; P:kynurenine metabolic process; P:ommochrome biosynthetic process; P:prostaglandin biosynthetic process; P:phagocytosis; P:cellular component organi…	F:GO:0004601; P:GO:0006979; P:GO:0055114; F:GO:0020037
TRINITY_GG_8990_c0_g1_i1	Lko057S001990	2	LOD1	Y2R2_DROMERecName: Full=Putative 115 kDa protein in type-1 retrotransposable element R1DM; AltName: Full=ORF 2; AltName: Full=Putative 115 kDa protein in type I retrotransposable element R1DM	829	gi|140023|sp|P16425.1|Y2R2_DROMERecName: Full=Putative 115 kDa protein in type-1 retrotransposable element R1DM; AltName: Full=ORF 2; AltName: Full=Putative 115 kDa protein in type I retrotransposable element R1DM gi|1335645|emb|CAA36227.1| unnamed protein product, partial [Drosophila melanogaster]	P16425, CAA36227	1.11e-06	56.4356	50.8322	101	57			no GO terms
TRINITY_GG_9629_c0_g1_i1	Lko057S002242	2	LOD1	CG6890	802	gi|77455398|gb|ABA86508.1|CG6890, partial [Drosophila melanogaster]	ABA86508	6.1e-16	56.5217	78.5666	138	78	P:GO:0009950; P:GO:0048513; P:GO:0060026; P:GO:0060049; C:GO:0005886; P:GO:0048935; P:GO:0003401; P:GO:0031349; F:GO:0005515; P:GO:0002227; P:GO:0010906; C:GO:0005737; P:GO:0002807; P:GO:0019730; P:GO:0050832	P:dorsal/ventral axis specification; P:animal organ development; P:convergent extension; P:regulation of protein glycosylation; C:plasma membrane; P:peripheral nervous system neuron development; P:axis elongation; P:positive regulation of defense response; F:protein binding; P:innate immune response in mucosa; P:regulation of glucose metabolic process; C:cytoplasm; P:positive regulation of antimi…	F:GO:0005515; P:GO:0007165
TRINITY_GG_10211_c0_g1_i1	Lko057S002490	2	LOD1	CG6126 [Drosophila melanogaster]	2390	gi|21355657|ref|NP_650528.1|CG6126 [Drosophila melanogaster] gi|15291135|gb|AAK92836.1| GH09241p [Drosophila melanogaster] gi|23171448|gb|AAF55286.3| CG6126 [Drosophila melanogaster]	NP_650528, AAK92836, AAF55286	0	74.954	656.366	543	407	F:GO:0022891; P:GO:0030307; P:GO:0007390; P:GO:0055085; P:GO:0040018; P:GO:0050896; P:GO:0007600; P:GO:0071702	F:substrate-specific transmembrane transporter activity; P:positive regulation of cell growth; P:germ-band shortening; P:transmembrane transport; P:positive regulation of multicellular organism growth; P:response to stimulus; P:sensory perception; P:organic substance transport	P:GO:0055085; F:GO:0022857; C:GO:0016021
TRINITY_GG_10209_c1_g1_i1	Lko057S002490	2	LOD1	CG6610	2135	gi|21358059|ref|NP_648022.1|CG6610, isoform A [Drosophila melanogaster] gi|442630491|ref|NP_001261461.1| CG6610, isoform B [Drosophila melanogaster] gi|442630493|ref|NP_001261462.1| CG6610, isoform C [Drosophila melanogaster] gi|7295386|gb|AAF50703.1| CG6610, isoform A [Drosophila melanogaster] gi|21064593|gb|AAM29526.1| RE60135p [Drosophila melanogaster] gi|440215357|gb|AGB94156.1| CG6610, isofo…	NP_648022, NP_001261461, NP_001261462, AAF50703, AAM29526, AGB94156, AGB94157	1.12e-43	97.619	152.91	84	82	P:GO:0007093; P:GO:0007097; P:GO:0022607; P:GO:0007411; P:GO:0048513; C:GO:0005875; P:GO:0007610; P:GO:0090092; P:GO:0060249; P:GO:0009628; F:GO:0003723; P:GO:0016570; P:GO:0030706; P:GO:0051241; C:GO:0005681; C:GO:0044444; P:GO:0000226; P:GO:0007304; F:GO:0005515; P:GO:0007219; P:GO:0007417; P:GO:0002009; P:GO:0048135; P:GO:0019233; P:GO:0034613; P:GO:0060541; C:GO:0036477; P:GO:0008088; P:GO:00…	P:mitotic cell cycle checkpoint; P:nuclear migration; P:cellular component assembly; P:axon guidance; P:animal organ development; C:microtubule associated complex; P:behavior; P:regulation of transmembrane receptor protein serine/threonine kinase signaling pathway; P:anatomical structure homeostasis; P:response to abiotic stimulus; F:RNA binding; P:histone modification; P:germarium-derived oocyte…	F:GO:0005515
TRINITY_GG_10208_c2_g1_i1	Lko057S002490	2	LOD1	male fertility factor kl2 [Drosophila melanogaster]	253	gi|939630232|ref|NP_001015505.5|male fertility factor kl2 [Drosophila melanogaster] gi|937540133|gb|EAL24531.5| male fertility factor kl2 [Drosophila melanogaster]	NP_001015505, EAL24531	2.49e-07	57.8947	47.3654	76	44	F:GO:0016887; C:GO:0030286	F:ATPase activity; C:dynein complex	no GO terms
TRINITY_GG_10210_c1_g1_i1	Lko057S002490	2	LOD1	mediator complex subunit 17 [Drosophila melanogaster]	2729	gi|21357131|ref|NP_650686.1|mediator complex subunit 17 [Drosophila melanogaster] gi|74947827|sp|Q9VEC1.1|MED17_DROME RecName: Full=Mediator of RNA polymerase II transcription subunit 17; AltName: Full=Mediator complex subunit 17; AltName: Full=dMED17; AltName: Full=dTRAP80 gi|7533040|gb|AAF63336.1|AF244916_1 mediator transcriptional cofactor TRAP80 [Drosophila melanogaster] gi|9937474|gb|AAG0246…	NP_650686, Q9VEC1, AAF63336, AAG02460, AAF55506, AAM50031	0	79.9383	843.573	648	518	P:GO:0007095; P:GO:0045498; C:GO:0005763; P:GO:0045944; F:GO:0001104; P:GO:0006367; F:GO:0003713; F:GO:0003735; C:GO:0016592; C:GO:0031618; P:GO:0019233; P:GO:0032543; F:GO:0033613	P:mitotic G2 DNA damage checkpoint; P:sex comb development; C:mitochondrial small ribosomal subunit; P:positive regulation of transcription from RNA polymerase II promoter; F:RNA polymerase II transcription cofactor activity; P:transcription initiation from RNA polymerase II promoter; F:transcription coactivator activity; F:structural constituent of ribosome; C:mediator complex; C:nuclear pericen…	C:GO:0016592; F:GO:0001104; P:GO:0006357
TRINITY_GG_10209_c2_g1_i1	Lko057S002490	2	LOD1	PREDICTED: coiled-coil domain-containing protein 81-like [Acropora digitifera]	1106	gi|1005443561|ref|XP_015759118.1|PREDICTED: coiled-coil domain-containing protein 81-like [Acropora digitifera]	XP_015759118	1.16e-11	52.071	74.7146	169	88			F:GO:0003677
TRINITY_GG_10208_c1_g1_i1	Lko057S002490	2	LOD1	PREDICTED: LOW QUALITY PROTEIN: dynein heavy chain 2, axonemal [Dinoponera quadriceps]	221	gi|951563000|ref|XP_014480414.1|PREDICTED: LOW QUALITY PROTEIN: dynein heavy chain 2, axonemal [Dinoponera quadriceps]	XP_014480414	3.52e-09	59.7015	58.9214	67	40	F:GO:0000166; F:GO:0016887; F:GO:0005524; F:GO:0003777; C:GO:0030286; P:GO:0007018	F:nucleotide binding; F:ATPase activity; F:ATP binding; F:microtubule motor activity; C:dynein complex; P:microtubule-based movement	no IPS match
TRINITY_GG_10209_c0_g1_i1	Lko057S002490	2	LOD1	uncharacterized protein Dmel_CG10898 [Drosophila melanogaster]	2973	gi|21356555|ref|NP_650083.1|uncharacterized protein Dmel_CG10898 [Drosophila melanogaster] gi|7299465|gb|AAF54653.1| uncharacterized protein Dmel_CG10898 [Drosophila melanogaster] gi|17944256|gb|AAL48022.1| LD28119p [Drosophila melanogaster]	NP_650083, AAF54653, AAL48022	1.04e-127	73.3918	391.349	342	251	P:GO:0022008; P:GO:0051726; C:GO:0005730; P:GO:0090307	P:neurogenesis; P:regulation of cell cycle; C:nucleolus; P:mitotic spindle assembly	no GO terms
TRINITY_GG_10213_c0_g1_i1	Lko057S002490	2	LOD1	uncharacterized protein Dmel_CG12091	3104	gi|24655293|ref|NP_647619.1|uncharacterized protein Dmel_CG12091, isoform A [Drosophila melanogaster] gi|442629441|ref|NP_001261261.1| uncharacterized protein Dmel_CG12091, isoform B [Drosophila melanogaster] gi|7292094|gb|AAF47506.1| uncharacterized protein Dmel_CG12091, isoform A [Drosophila melanogaster] gi|21464366|gb|AAM51986.1| RE06653p [Drosophila melanogaster] gi|440215128|gb|AGB93956.1| …	NP_647619, NP_001261261, AAF47506, AAM51986, AGB93956	6.91e-121	74.2138	373.629	318	236	F:GO:0004722; C:GO:0005739; P:GO:0006470	F:protein serine/threonine phosphatase activity; C:mitochondrion; P:protein dephosphorylation	F:GO:0003824
TRINITY_GG_10210_c0_g1_i1	Lko057S002490	2	LOD1	uncharacterized protein Dmel_CG18004	1395	gi|45551072|ref|NP_724986.2|uncharacterized protein Dmel_CG18004, isoform B [Drosophila melanogaster] gi|45445585|gb|AAM68756.2| uncharacterized protein Dmel_CG18004, isoform B [Drosophila melanogaster] gi|255522972|gb|ACU12378.1| AT13868p [Drosophila melanogaster]	NP_724986, AAM68756, ACU12378	3.85e-09	86.7925	58.5362	53	46	P:GO:0006281; P:GO:0006260; C:GO:0031011	P:DNA repair; P:DNA replication; C:Ino80 complex	no GO terms
TRINITY_GG_10363_c1_g1_i1	Lko057S002553	2	LOD1	C/EBP [Drosophila melanogaster]	1088	gi|416353|gb|AAA28415.1|C/EBP [Drosophila melanogaster]	AAA28415	0.000127	45.679	44.669	162	74			no GO terms
TRINITY_GG_10362_c0_g1_i1	Lko057S002553	2	LOD1	slow border cells	2741	gi|17647933|ref|NP_523843.1|slow border cells, isoform A [Drosophila melanogaster] gi|665403432|ref|NP_001286836.1| slow border cells, isoform B [Drosophila melanogaster] gi|68067724|sp|Q02637.3|CEBP_DROME RecName: Full=CCAAT/enhancer-binding protein; Short=C/EBP; AltName: Full=Slow border cell protein gi|7291773|gb|AAF47194.1| slow border cells, isoform A [Drosophila melanogaster] gi|33589388|gb…	NP_523843, NP_001286836, Q02637, AAF47194, AAQ22461, AHN56631	2.05e-09	85.9649	62.003	57	49	C:GO:0005634; F:GO:0003700; P:GO:0010906; F:GO:0046982; F:GO:0000977; P:GO:0007298; P:GO:0001708; P:GO:0045944; P:GO:0046427	C:nucleus; F:transcription factor activity, sequence-specific DNA binding; P:regulation of glucose metabolic process; F:protein heterodimerization activity; F:RNA polymerase II regulatory region sequence-specific DNA binding; P:border follicle cell migration; P:cell fate specification; P:positive regulation of transcription from RNA polymerase II promoter; P:positive regulation of JAK-STAT cascade	F:GO:0003700; P:GO:0006355
TRINITY_GG_10360_c2_g1_i1	Lko057S002553	2	LOD1	subdued	5388	gi|24648226|ref|NP_650820.1|subdued, isoform A [Drosophila melanogaster] gi|7300532|gb|AAF55685.1| subdued, isoform A [Drosophila melanogaster] gi|33636639|gb|AAQ23617.1| LD10322p [Drosophila melanogaster]	NP_650820, AAF55685, AAQ23617	0	70.7022	842.032	826	584	F:GO:0005229; P:GO:0050829; C:GO:0016020; F:GO:0097603; C:GO:0044464; P:GO:0006821; P:GO:0050965; C:GO:0043227; F:GO:0005247	F:intracellular calcium activated chloride channel activity; P:defense response to Gram-negative bacterium; C:membrane; F:temperature-gated ion channel activity; C:cell part; P:chloride transport; P:detection of temperature stimulus involved in sensory perception of pain; C:membrane-bounded organelle; F:voltage-gated chloride channel activity	F:GO:0046983
TRINITY_GG_10363_c0_g1_i1	Lko057S002553	2	LOD1	synaptobrevin	987	gi|24652377|ref|NP_724906.1|synaptobrevin, isoform B [Drosophila melanogaster] gi|21627570|gb|AAM68777.1| synaptobrevin, isoform B [Drosophila melanogaster] gi|28380962|gb|AAO41448.1| RE28766p [Drosophila melanogaster]	NP_724906, AAM68777, AAO41448	1.71e-10	53.9216	58.9214	102	55	C:GO:0048786; C:GO:0043195; P:GO:0006906; C:GO:0008021; F:GO:0005484; C:GO:0031201; F:GO:0000149; C:GO:0005886; P:GO:0007269; P:GO:0035149	C:presynaptic active zone; C:terminal bouton; P:vesicle fusion; C:synaptic vesicle; F:SNAP receptor activity; C:SNARE complex; F:SNARE binding; C:plasma membrane; P:neurotransmitter secretion; P:lumen formation, open tracheal system	P:GO:0016192; C:GO:0016021
TRINITY_GG_10756_c0_g1_i1	Lko057S002761	2	LOD1	AT03090p [Drosophila melanogaster]	879	gi|21063947|gb|AAM29203.1|AT03090p [Drosophila melanogaster]	AAM29203	3.36e-11	42.7083	64.3142	192	82	C:GO:0031901; P:GO:0035220; C:GO:0031902; F:GO:0004842; F:GO:0008270; P:GO:0000209; P:GO:0022416; C:GO:0005886	C:early endosome membrane; P:wing disc development; C:late endosome membrane; F:ubiquitin-protein transferase activity; F:zinc ion binding; P:protein polyubiquitination; P:chaeta development; C:plasma membrane	F:GO:0008270
TRINITY_GG_10755_c0_g1_i1	Lko057S002761	2	LOD1	multi drug resistance 50 [Drosophila melanogaster]	5080	gi|85726357|ref|NP_523740.3|multi drug resistance 50 [Drosophila melanogaster] gi|60678007|gb|AAX33510.1| LP14331p [Drosophila melanogaster] gi|84795750|gb|AAF58271.3| multi drug resistance 50 [Drosophila melanogaster]	NP_523740, AAX33510, AAF58271	0	70.9408	1395.95	1318	935	P:GO:0001666; P:GO:0031427; P:GO:0055085; F:GO:0015562; P:GO:0042908; P:GO:0060857; C:GO:0005919; P:GO:0008354; F:GO:0008559; C:GO:0043190	P:response to hypoxia; P:response to methotrexate; P:transmembrane transport; F:efflux transmembrane transporter activity; P:xenobiotic transport; P:establishment of glial blood-brain barrier; C:pleated septate junction; P:germ cell migration; F:xenobiotic-transporting ATPase activity; C:ATP-binding cassette (ABC) transporter complex	F:GO:0016887; F:GO:0005524; F:GO:0042626; P:GO:0055085; C:GO:0016021; P:GO:0006810
TRINITY_GG_10757_c0_g1_i1;TRINITY_GG_10757_c2_g1_i1	Lko057S002761	2	LOD1	protein kinase D	3343	gi|45550768|ref|NP_650710.3|protein kinase D, isoform A [Drosophila melanogaster] gi|45551923|ref|NP_732325.3| protein kinase D, isoform B [Drosophila melanogaster] gi|45551925|ref|NP_732326.3| protein kinase D, isoform C [Drosophila melanogaster] gi|45551927|ref|NP_732327.3| protein kinase D, isoform D [Drosophila melanogaster] gi|221379848|ref|NP_001138074.1| protein kinase D, isoform E [Drosop…	NP_650710, NP_732325, NP_732326, NP_732327, NP_001138074, NP_001262704, AAM48341, AAF55536, AAN13769, AAF55537, AAN13770, ACL83532, AGB96084	0	73.1481	859.366	756	553	P:GO:0006282;P:GO:0008582;P:GO:0035120;P:GO:0008049;P:GO:0044773;F:GO:0004683;P:GO:0006468;C:GO:0030425;P:GO:0051489;C:GO:0048786;C:GO:0045211;P:GO:0006919;P:GO:0035114;C:GO:0030424;P:GO:0007281;P:GO:0035234;P:GO:0060278;P:GO:0007560;P:GO:0007268;P:GO:0008630;F:GO:0005488;F:GO:0050321;P:GO:0007616;C:GO:0005634;P:GO:0010906;C:GO:0005737;P:GO:0019233;F:GO:0004674	P:regulationofDNArepair;P:regulationofsynapticgrowthatneuromuscularjunction;P:post-embryonicappendagemorphogenesis;P:malecourtshipbehavior;P:mitoticDNAdamagecheckpoint;F:calmodulin-dependentproteinkinaseactivity;P:proteinphosphorylation;C:dendrite;P:regulationoffilopodiumassembly;C:presynapticactivezone;C:postsynapticmembrane;P:activationofcysteine-typeendopeptidaseactivityinvolvedinapoptoticproc…	F:GO:0005524;F:GO:0004672;P:GO:0006468;P:GO:0035556;noIPSmatch
TRINITY_GG_12693_c1_g1_i1;TRINITY_GG_12693_c20_g1_i1	Lko057S003828	2	LOD1	AT22791p [Drosophila melanogaster]	1327	gi|21064137|gb|AAM29298.1|AT22791p [Drosophila melanogaster]	AAM29298	3.89e-63	54.9654	216.083	433	238	F:GO:0004842;C:GO:0005634;C:GO:0005737;F:GO:0046872;P:GO:0016567	F:ubiquitin-proteintransferaseactivity;C:nucleus;C:cytoplasm;F:metalionbinding;P:proteinubiquitination	noGOterms;noIPSmatch
TRINITY_GG_12693_c0_g1_i1;TRINITY_GG_12693_c14_g1_i1;TRINITY_GG_12693_c16_g1_i1;TRINITY_GG_12693_c17_g1_i1;TRINITY_GG_12693_c18_g1_i1;TRINITY_GG_12693_c2_g1_i1;TRINITY_GG_12693_c23_g1_i1;TRINITY_GG_12693_c25_g1_i1;TRINITY_GG_12693_c27_g1_i1;TRINITY_GG_12693_c29_g1_i1;TRINITY_GG_12693_c3_g1_i1;TRINITY_GG_12693_c4_g1_i1;TRINITY_GG_12693_c5_g1_i1	Lko057S003828	2	LOD1	HECT and RLD domain containing protein 2 [Drosophila melanogaster]	211	gi|281361147|ref|NP_608388.2|HECT and RLD domain containing protein 2 [Drosophila melanogaster] gi|91206848|sp|Q9VR91.3|HERC2_DROME RecName: Full=Probable E3 ubiquitin-protein ligase HERC2; AltName: Full=HECT domain and RCC1-like domain-containing protein 2; AltName: Full=HECT-type E3 ubiquitin transferase HERC2 gi|272506184|gb|AAF50913.3| HECT and RLD domain containing protein 2 [Drosophila mela…	NP_608388, Q9VR91, AAF50913	7.87e-12	62.6866	59.3066	67	42	C:GO:0044424;C:GO:0043229;P:GO:1903078;P:GO:0034126;P:GO:0051865;F:GO:0004842;C:GO:0005634;C:GO:0005737;F:GO:0046872;P:GO:0016567;P:GO:0060341;P:GO:0032880;C:GO:0043232;P:GO:0048699;P:GO:0048519;P:GO:0009966;P:GO:0044765;P:GO:0051049;P:GO:0007417;P:GO:0048522;P:GO:0043473;P:GO:0050808;F:GO:0005088;P:GO:0007399;P:GO:0045886;P:GO:0048678;C:GO:0005886;P:GO:0007616;P:GO:0030514;P:GO:0048066;F:GO:0005…	C:intracellularpart;C:intracellularorganelle;P:positiveregulationofproteinlocalizationtoplasmamembrane;P:positiveregulationofMyD88-dependenttoll-likereceptorsignalingpathway;P:proteinautoubiquitination;F:ubiquitin-proteintransferaseactivity;C:nucleus;C:cytoplasm;F:metalionbinding;P:proteinubiquitination;P:regulationofcellularlocalization;P:regulationofproteinlocalization;C:intracellularnon-membra…	noIPSmatch;noGOterms;F:GO:0004842
TRINITY_GG_12693_c15_g1_i1;TRINITY_GG_12693_c22_g1_i1	Lko057S003828	2	LOD1	HERC2	380	gi|170181478|gb|ACB11621.1|HERC2, partial [Drosophila melanogaster]	ACB11621	1.66e-29	78.9474	110.538	76	60	C:GO:0005634;F:GO:0004842;C:GO:0005737;P:GO:0016567;C:GO:0044424	C:nucleus;F:ubiquitin-proteintransferaseactivity;C:cytoplasm;P:proteinubiquitination;C:intracellularpart	noGOterms;noIPSmatch
TRINITY_GG_12694_c0_g1_i1	Lko057S003828	2	LOD1	hypothetical protein L798_08198 [Zootermopsis nevadensis]	2714	gi|646713600|gb|KDR17891.1|hypothetical protein L798_08198 [Zootermopsis nevadensis]	KDR17891	1.39e-62	54.0594	238.039	505	273	F:GO:0000166; F:GO:0000287; F:GO:0005524; F:GO:0046872; P:GO:0045332; C:GO:0016020; C:GO:0016021; P:GO:0015914; F:GO:0004012; F:GO:0016787	F:nucleotide binding; F:magnesium ion binding; F:ATP binding; F:metal ion binding; P:phospholipid translocation; C:membrane; C:integral component of membrane; P:phospholipid transport; F:phospholipid-translocating ATPase activity; F:hydrolase activity	F:GO:0005515
TRINITY_GG_12692_c0_g1_i1	Lko057S003828	2	LOD1	lipase 4	1038	gi|19921102|ref|NP_609418.1|lipase 4, isoform A [Drosophila melanogaster] gi|7297720|gb|AAF52971.1| lipase 4, isoform A [Drosophila melanogaster] gi|19528419|gb|AAL90324.1| RE12242p [Drosophila melanogaster]	NP_609418, AAF52971, AAL90324	6.34e-114	66.5635	338.576	323	215	C:GO:0005615; P:GO:0032504; P:GO:0007586; P:GO:0048812; C:GO:0031410; F:GO:0004771; P:GO:0070328; P:GO:0042632	C:extracellular space; P:multicellular organism reproduction; P:digestion; P:neuron projection morphogenesis; C:cytoplasmic vesicle; F:sterol esterase activity; P:triglyceride homeostasis; P:cholesterol homeostasis	F:GO:0016788; P:GO:0006629
TRINITY_GG_12693_c7_g1_i1	Lko057S003828	2	LOD1	mind bomb 1	524	gi|442632653|ref|NP_001261913.1|mind bomb 1, isoform B [Drosophila melanogaster] gi|440215859|gb|AGB94606.1| mind bomb 1, isoform B [Drosophila melanogaster]	NP_001261913, AGB94606	3.73e-08	57.6923	52.7582	52	30	P:GO:0007480; F:GO:0061630; P:GO:0000209; F:GO:0045159; P:GO:0007476; P:GO:0008104; C:GO:0045179; P:GO:0006897; P:GO:0045747; P:GO:0007219; P:GO:0001745; P:GO:0046331; C:GO:0030017	P:imaginal disc-derived leg morphogenesis; F:ubiquitin protein ligase activity; P:protein polyubiquitination; F:myosin II binding; P:imaginal disc-derived wing morphogenesis; P:protein localization; C:apical cortex; P:endocytosis; P:positive regulation of Notch signaling pathway; P:Notch signaling pathway; P:compound eye morphogenesis; P:lateral inhibition; C:sarcomere	F:GO:0008270
TRINITY_GG_12693_c21_g1_i1	Lko057S003828	2	LOD1	PREDICTED: E3 ubiquitin-protein ligase HERC2 [Linepithema humile]	265	gi|815808917|ref|XP_012225308.1|PREDICTED: E3 ubiquitin-protein ligase HERC2 [Linepithema humile]	XP_012225308	2.17e-05	62.069	48.9062	58	36			no GO terms
TRINITY_GG_12789_c0_g1_i1	Lko057S003866	2	LOD1	CG9135	4912	gi|20129257|ref|NP_608985.1|CG9135, isoform A [Drosophila melanogaster] gi|24582121|ref|NP_723150.1| CG9135, isoform B [Drosophila melanogaster] gi|665404519|ref|NP_001285655.1| CG9135, isoform C [Drosophila melanogaster] gi|665404521|ref|NP_001285656.1| CG9135, isoform D [Drosophila melanogaster] gi|7297063|gb|AAF52332.1| CG9135, isoform A [Drosophila melanogaster] gi|16185397|gb|AAL13911.1| LD3…	NP_608985, NP_723150, NP_001285655, NP_001285656, AAF52332, AAL13911, AAN10577, CAL26239, CAL26240, CAL26241, CAL26242, CAL26243, CAL26244, CAL26245, CAL26246, CAL26247, CAL26248, CAR93302, CAR93303, CAR93304, CAR93305, CAR93306, CAR93307, CAR93308, CAR93309, CAR93310, CAR93311, CAR93312, CAR93313, AHN54170, AHN54171	6.99e-164	74.5763	506.523	413	308	P:GO:0034260; P:GO:0044708; P:GO:0044707; P:GO:0008582; P:GO:0044763; P:GO:0048523; F:GO:0005488; P:GO:0009966; C:GO:0005875; C:GO:0043227; P:GO:0006357; C:GO:0005737; P:GO:0016043; P:GO:0050877; P:GO:0050896	P:negative regulation of GTPase activity; P:single-organism behavior; P:single-multicellular organism process; P:regulation of synaptic growth at neuromuscular junction; P:single-organism cellular process; P:negative regulation of cellular process; F:binding; P:regulation of signal transduction; C:microtubule associated complex; C:membrane-bounded organelle; P:regulation of transcription from RNA…	no GO terms
TRINITY_GG_12789_c1_g1_i1	Lko057S003866	2	LOD1	muscleblind	2840	gi|442624004|ref|NP_001261044.1|muscleblind, isoform P [Drosophila melanogaster] gi|440214471|gb|AGB93576.1| muscleblind, isoform P [Drosophila melanogaster]	NP_001261044, AGB93576	0.000311	54.0984	45.4394	61	33	P:GO:0046716; P:GO:0045924; P:GO:0007476; P:GO:0007422; P:GO:0007525; P:GO:0007517; P:GO:0001751; F:GO:0003676; F:GO:0003677; C:GO:0030018; C:GO:0005634; P:GO:0001654; C:GO:0048471; C:GO:0005737; P:GO:0042052; F:GO:0046872; P:GO:0000381; P:GO:0006915; P:GO:0010468; C:GO:0031673	P:muscle cell cellular homeostasis; P:regulation of female receptivity; P:imaginal disc-derived wing morphogenesis; P:peripheral nervous system development; P:somatic muscle development; P:muscle organ development; P:compound eye photoreceptor cell differentiation; F:nucleic acid binding; F:DNA binding; C:Z disc; C:nucleus; P:eye development; C:perinuclear region of cytoplasm; C:cytoplasm; P:rhab…	F:GO:0046872
TRINITY_GG_12786_c0_g1_i1;TRINITY_GG_12786_c0_g1_i2	Lko057S003866	2	LOD1	Zinc finger CCCH domain-containing protein 10 [Zootermopsis nevadensis]	2562	gi|646699392|gb|KDR10022.1|Zinc finger CCCH domain-containing protein 10 [Zootermopsis nevadensis]	KDR10022	2.93e-64	58.6538	230.335	312	183	F:GO:0005488	F:binding	F:GO:0046872
TRINITY_GG_16778_c1_g1_i1	Lko057S008331	2	LOD1	MIP03045p	800	gi|261259999|gb|ACX54934.1|MIP03045p, partial [Drosophila melanogaster]	ACX54934	1.96e-79	71.8919	248.44	185	133	P:GO:0044699	P:single-organism process	F:GO:0030246
TRINITY_GG_8843_c0_g1_i1	Lko057S001935	2	LOD2	ankyrin 2	1253	gi|320545672|ref|NP_001189067.1|ankyrin 2, isoform Q [Drosophila melanogaster] gi|318069162|gb|ADV37504.1| ankyrin 2, isoform Q [Drosophila melanogaster]	NP_001189067, ADV37504	1.73e-13	47.205	73.9442	161	76	C:GO:0098793; P:GO:0050794; P:GO:0016043; P:GO:0044763; P:GO:0050877; C:GO:0005886	C:presynapse; P:regulation of cellular process; P:cellular component organization; P:single-organism cellular process; P:neurological system process; C:plasma membrane	F:GO:0005515
TRINITY_GG_9438_c2_g1_i1	Lko057S002151	2	LOD2	Aac11 [Drosophila melanogaster]	5221	gi|17137712|ref|NP_477454.1|Aac11 [Drosophila melanogaster] gi|74867106|sp|Q9V431.1|API5_DROME RecName: Full=Apoptosis inhibitor 5 homolog; Short=API-5; AltName: Full=Antiapoptosis clone 11 protein homolog; Short=AAC-11 gi|5679110|gb|AAD46861.1|AF160921_1 BcDNA.LD09852 [Drosophila melanogaster] gi|7298393|gb|AAF53618.1| Aac11 [Drosophila melanogaster]	NP_477454, Q9V431, AAD46861, AAF53618	6.76e-161	68.3594	502.286	512	350	F:GO:0005515; P:GO:0043066; P:GO:0019233; P:GO:0022008	F:protein binding; P:negative regulation of apoptotic process; P:sensory perception of pain; P:neurogenesis	F:GO:0005488
TRINITY_GG_9436_c0_g1_i1	Lko057S002151	2	LOD2	I[[h]] channel	1754	gi|221330263|ref|NP_001033946.2|I[[h]] channel, isoform I [Drosophila melanogaster] gi|220902221|gb|ABC66060.2| I[[h]] channel, isoform I [Drosophila melanogaster]	NP_001033946, ABC66060	5.94e-41	46.6667	157.918	435	203	P:GO:0065008; P:GO:0044708; P:GO:0044707; P:GO:1903530; P:GO:0051716; P:GO:0048512; P:GO:0006810; P:GO:0009416; P:GO:0043269; P:GO:0051952	P:regulation of biological quality; P:single-organism behavior; P:single-multicellular organism process; P:regulation of secretion by cell; P:cellular response to stimulus; P:circadian behavior; P:transport; P:response to light stimulus; P:regulation of ion transport; P:regulation of amine transport	no GO terms
TRINITY_GG_9438_c9_g1_i1	Lko057S002151	2	LOD2	odz pair rule gene product=tenascin homolog [Drosophila melanogaster, 9- to 12-hour-old embryos, Peptide, 2406 aa]	257	gi|546834|gb|AAB30821.1|odz pair rule gene product=tenascin homolog [Drosophila melanogaster, 9- to 12-hour-old embryos, Peptide, 2406 aa]	AAB30821	1.84e-50	98.8235	170.244	85	84	C:GO:0042734; P:GO:0008360; F:GO:0042802; P:GO:0008045; P:GO:0045467; P:GO:0007155; P:GO:0022416; C:GO:0005578; C:GO:0005887; P:GO:0097264; P:GO:0051124; C:GO:0045211; F:GO:0003824; P:GO:0048036; P:GO:0048058; P:GO:0019233; C:GO:0031594; P:GO:0016200; F:GO:0031005	C:presynaptic membrane; P:regulation of cell shape; F:identical protein binding; P:motor neuron axon guidance; P:R7 cell development; P:cell adhesion; P:chaeta development; C:proteinaceous extracellular matrix; C:integral component of plasma membrane; P:self proteolysis; P:synaptic growth at neuromuscular junction; C:postsynaptic membrane; F:catalytic activity; P:central complex development; P:co…	no IPS match
TRINITY_GG_9437_c0_g1_i1	Lko057S002151	2	LOD2	SD10403p [Drosophila melanogaster]	4480	gi|17863052|gb|AAL40003.1|SD10403p [Drosophila melanogaster]	AAL40003	8.84e-149	58.6922	468.389	627	368	P:GO:0008152; P:GO:0050965; P:GO:0050775	P:metabolic process; P:detection of temperature stimulus involved in sensory perception of pain; P:positive regulation of dendrite morphogenesis	F:GO:0003676; F:GO:0016491; P:GO:0008152; F:GO:0008168; P:GO:0055114
TRINITY_GG_9438_c3_g1_i1;TRINITY_GG_9438_c5_g1_i1	Lko057S002151	2	LOD2	tenascin-like protein [Drosophila melanogaster]	387	gi|510506|emb|CAA51678.1|tenascin-like protein [Drosophila melanogaster]	CAA51678	1.24e-64	93.75	213.001	128	120	C:GO:0042734;P:GO:0008360;F:GO:0042802;P:GO:0008045;P:GO:0045467;P:GO:0007155;P:GO:0022416;C:GO:0005578;C:GO:0005887;P:GO:0051124;C:GO:0045211;P:GO:0048036;P:GO:0048058;P:GO:0019233;C:GO:0031594;P:GO:0016200;F:GO:0031005	C:presynapticmembrane;P:regulationofcellshape;F:identicalproteinbinding;P:motorneuronaxonguidance;P:R7celldevelopment;P:celladhesion;P:chaetadevelopment;C:proteinaceousextracellularmatrix;C:integralcomponentofplasmamembrane;P:synapticgrowthatneuromuscularjunction;C:postsynapticmembrane;P:centralcomplexdevelopment;P:compoundeyecorneallensdevelopment;P:sensoryperceptionofpain;C:neuromuscularjunctio…	noGOterms
TRINITY_GG_9438_c10_g1_i1	Lko057S002151	2	LOD2	tenascin accessory	377	gi|281360749|ref|NP_001162729.1|tenascin accessory, isoform G [Drosophila melanogaster] gi|272506068|gb|ACZ95264.1| tenascin accessory, isoform G [Drosophila melanogaster]	NP_001162729, ACZ95264	7.45e-05	61.5385	41.9726	39	24	C:GO:0042734; P:GO:0097264; P:GO:0051124; F:GO:0003824; P:GO:0048036; C:GO:0031594; P:GO:0016200; C:GO:0005576; C:GO:0005578; P:GO:0008039	C:presynaptic membrane; P:self proteolysis; P:synaptic growth at neuromuscular junction; F:catalytic activity; P:central complex development; C:neuromuscular junction; P:synaptic target attraction; C:extracellular region; C:proteinaceous extracellular matrix; P:synaptic target recognition	no IPS match
TRINITY_GG_9438_c1_g1_i1;TRINITY_GG_9438_c11_g1_i1;TRINITY_GG_9438_c4_g1_i1;TRINITY_GG_9438_c6_g1_i1;TRINITY_GG_9438_c7_g1_i1	Lko057S002151	2	LOD2	tenascin major	628	gi|442634156|ref|NP_001262211.1|tenascin major, isoform E [Drosophila melanogaster] gi|440216189|gb|AGB94904.1| tenascin major, isoform E [Drosophila melanogaster]	NP_001262211, AGB94904	2.31e-101	91.1458	322.013	192	175	P:GO:0008360;F:GO:0042802;P:GO:0008045;P:GO:0045467;P:GO:0007155;P:GO:0022416;C:GO:0005578;C:GO:0005887;P:GO:0051124;C:GO:0045211;P:GO:0048058;P:GO:0019233;C:GO:0031594;P:GO:0016200;F:GO:0031005;C:GO:0042734;P:GO:0048036;P:GO:0007163;P:GO:0048519;P:GO:0040008;P:GO:0001736;P:GO:0098609	P:regulationofcellshape;F:identicalproteinbinding;P:motorneuronaxonguidance;P:R7celldevelopment;P:celladhesion;P:chaetadevelopment;C:proteinaceousextracellularmatrix;C:integralcomponentofplasmamembrane;P:synapticgrowthatneuromuscularjunction;C:postsynapticmembrane;P:compoundeyecorneallensdevelopment;P:sensoryperceptionofpain;C:neuromuscularjunction;P:synaptictargetattraction;F:filaminbinding;C:pr…	P:GO:0097264;noGOterms;noIPSmatch
TRINITY_GG_9437_c1_g1_i1	Lko057S002151	2	LOD2	uncharacterized protein Dmel_CG16771	1838	gi|24585213|ref|NP_609963.1|uncharacterized protein Dmel_CG16771, isoform A [Drosophila melanogaster] gi|320545251|ref|NP_001188848.1| uncharacterized protein Dmel_CG16771, isoform B [Drosophila melanogaster] gi|320545253|ref|NP_001188849.1| uncharacterized protein Dmel_CG16771, isoform C [Drosophila melanogaster] gi|442628380|ref|NP_001260575.1| uncharacterized protein Dmel_CG16771, isoform D [D…	NP_609963, NP_001188848, NP_001188849, NP_001260575, NP_001260576, AAF53795, ADV37097, ADV37098, AGB93110, AGB93111	0	72.6337	536.569	486	353	P:GO:0032504; P:GO:0001666; P:GO:0008340; P:GO:0007399; P:GO:0042045; P:GO:0035094; P:GO:0016311; F:GO:0004035; C:GO:0009986	P:multicellular organism reproduction; P:response to hypoxia; P:determination of adult lifespan; P:nervous system development; P:epithelial fluid transport; P:response to nicotine; P:dephosphorylation; F:alkaline phosphatase activity; C:cell surface	F:GO:0003824; P:GO:0008152; F:GO:0016791
TRINITY_GG_13923_c2_g1_i1	Lko057S004771	2	LOD2	AT07754p [Drosophila melanogaster]	3846	gi|323301210|gb|ADX35947.1|AT07754p [Drosophila melanogaster]	ADX35947	0	77.3303	1129.01	869	672	F:GO:0008270; P:GO:0006508; P:GO:0033227; F:GO:0008237	F:zinc ion binding; P:proteolysis; P:dsRNA transport; F:metallopeptidase activity	F:GO:0008270; F:GO:0008237
TRINITY_GG_13923_c0_g1_i1	Lko057S004771	2	LOD2	CG7220	1957	gi|28573347|ref|NP_610604.3|CG7220, isoform A [Drosophila melanogaster] gi|28573348|ref|NP_724965.2| CG7220, isoform C [Drosophila melanogaster] gi|45552573|ref|NP_995809.1| CG7220, isoform D [Drosophila melanogaster] gi|17944720|gb|AAL48428.1| AT19555p [Drosophila melanogaster] gi|28380887|gb|AAM68746.2| CG7220, isoform A [Drosophila melanogaster] gi|28380888|gb|AAM68747.2| CG7220, isoform C [Dr…	NP_610604, NP_724965, NP_995809, AAL48428, AAM68746, AAM68747, AAS64867, ANY27422	9.34e-86	89.7959	266.159	147	132	P:GO:0061057; F:GO:0061630; P:GO:0019915; F:GO:0061631; P:GO:0016925; P:GO:1903364; P:GO:0007630; P:GO:0045842; P:GO:0051092; P:GO:0007412; C:GO:0031616; P:GO:0006979; P:GO:0007625; P:GO:0051124; P:GO:0001745; P:GO:0007629; P:GO:0006959; P:GO:0034126; P:GO:0072347; F:GO:0033134; P:GO:0010458; P:GO:0007281; C:GO:0035370; P:GO:0008594; P:GO:0060074; P:GO:0000209; P:GO:0045977; P:GO:0006513; P:GO:19…	P:peptidoglycan recognition protein signaling pathway; F:ubiquitin protein ligase activity; P:lipid storage; F:ubiquitin conjugating enzyme activity; P:protein sumoylation; P:positive regulation of cellular protein catabolic process; P:jump response; P:positive regulation of mitotic metaphase/anaphase transition; P:positive regulation of NF-kappaB transcription factor activity; P:axon target reco…	no GO terms
TRINITY_GG_13921_c8_g1_i1	Lko057S004771	2	LOD2	Collagen alpha-1(XV) chain [Zootermopsis nevadensis]	399	gi|646708948|gb|KDR15063.1|Collagen alpha-1(XV) chain [Zootermopsis nevadensis]	KDR15063	1.91e-16	84.8485	82.0333	99	84	C:GO:0005581; F:GO:0005198; P:GO:0007155; C:GO:0031012	C:collagen trimer; F:structural molecule activity; P:cell adhesion; C:extracellular matrix	no GO terms
TRINITY_GG_13922_c0_g1_i1	Lko057S004771	2	LOD2	Ecdysone-induced protein 63E	3336	gi|442630002|ref|NP_001261373.1|Ecdysone-induced protein 63E, isoform N [Drosophila melanogaster] gi|440215256|gb|AGB94068.1| Ecdysone-induced protein 63E, isoform N [Drosophila melanogaster]	NP_001261373, AGB94068	0	88.0383	673.315	418	368	P:GO:0007095; P:GO:0008045; P:GO:0008340; P:GO:0008582; P:GO:0007552; P:GO:0006468; C:GO:0005875; P:GO:0002168; P:GO:0051642; F:GO:0005524; P:GO:0048142; P:GO:0000086; P:GO:0001700; P:GO:0007629; P:GO:0030707; P:GO:0000082; C:GO:0005829; C:GO:0016533; P:GO:0035011; P:GO:0032880; P:GO:0007141; P:GO:0007284; F:GO:0004693; P:GO:0048589; C:GO:0005886; P:GO:0008315; F:GO:0020037; P:GO:0010906; P:GO:00…	P:mitotic G2 DNA damage checkpoint; P:motor neuron axon guidance; P:determination of adult lifespan; P:regulation of synaptic growth at neuromuscular junction; P:metamorphosis; P:protein phosphorylation; C:microtubule associated complex; P:instar larval development; P:centrosome localization; F:ATP binding; P:germarium-derived cystoblast division; P:G2/M transition of mitotic cell cycle; P:embryo…	F:GO:0005524; F:GO:0004672; P:GO:0006468
TRINITY_GG_13921_c1_g1_i1	Lko057S004771	2	LOD2	GM30371p [Drosophila melanogaster]	746	gi|21430112|gb|AAM50734.1|GM30371p [Drosophila melanogaster]	AAM50734	1.56e-83	82.3204	252.292	181	149	P:GO:0008045; C:GO:0005581; F:GO:0005198; P:GO:0071711; P:GO:0007155; C:GO:0031012; F:GO:0030246; P:GO:0014899; P:GO:2001046; P:GO:0007005; P:GO:0014732	P:motor neuron axon guidance; C:collagen trimer; F:structural molecule activity; P:basement membrane organization; P:cell adhesion; C:extracellular matrix; F:carbohydrate binding; P:cardiac muscle atrophy; P:positive regulation of integrin-mediated signaling pathway; P:mitochondrion organization; P:skeletal muscle atrophy	F:GO:0005198; P:GO:0007155; C:GO:0031012
TRINITY_GG_13921_c5_g1_i1	Lko057S004771	2	LOD2	multiplexin transcript 11	585	gi|187403732|gb|ACD03747.1|multiplexin transcript 11, partial [Drosophila melanogaster]	ACD03747	1.07e-20	74.2424	89.7373	66	49	P:GO:0008045; C:GO:0005581; P:GO:0071711; F:GO:0030246; P:GO:0014899; P:GO:2001046; P:GO:0007005; P:GO:0014732	P:motor neuron axon guidance; C:collagen trimer; P:basement membrane organization; F:carbohydrate binding; P:cardiac muscle atrophy; P:positive regulation of integrin-mediated signaling pathway; P:mitochondrion organization; P:skeletal muscle atrophy	no IPS match
TRINITY_GG_13923_c7_g1_i1	Lko057S004771	2	LOD2	RE12912p [Drosophila melanogaster]	208	gi|257471046|gb|ACV53871.1|RE12912p [Drosophila melanogaster]	ACV53871	1.44e-18	70.1493	78.1814	67	47	P:GO:0033227	P:dsRNA transport	no GO terms
TRINITY_GG_13921_c3_g1_i1	Lko057S004771	2	LOD2	RE33133p [Drosophila melanogaster]	646	gi|218506039|gb|ACK77661.1|RE33133p [Drosophila melanogaster]	ACK77661	6.39e-13	47.2906	68.1662	203	96	P:GO:0008045; P:GO:0071711; P:GO:0014899; P:GO:2001046; P:GO:0007005; P:GO:0014732	P:motor neuron axon guidance; P:basement membrane organization; P:cardiac muscle atrophy; P:positive regulation of integrin-mediated signaling pathway; P:mitochondrion organization; P:skeletal muscle atrophy	no GO terms
TRINITY_GG_13922_c1_g1_i1	Lko057S004771	2	LOD2	serine/threonine protein kinase [Drosophila melanogaster]	630	gi|1524004|emb|CAA67862.1|serine/threonine protein kinase [Drosophila melanogaster]	CAA67862	3.38e-20	65.3061	88.5817	98	64	P:GO:0001700; P:GO:0002009; C:GO:0005829; F:GO:0030332; F:GO:0004693; P:GO:0007552; P:GO:0048589; P:GO:0006468; C:GO:0005886; P:GO:0002168	P:embryonic development via the syncytial blastoderm; P:morphogenesis of an epithelium; C:cytosol; F:cyclin binding; F:cyclin-dependent protein serine/threonine kinase activity; P:metamorphosis; P:developmental growth; P:protein phosphorylation; C:plasma membrane; P:instar larval development	no GO terms
TRINITY_GG_13923_c4_g1_i1	Lko057S004771	2	LOD2	uncharacterized protein Dmel_CG15743	2082	gi|24641722|ref|NP_572869.1|uncharacterized protein Dmel_CG15743, isoform A [Drosophila melanogaster] gi|442616204|ref|NP_001259511.1| uncharacterized protein Dmel_CG15743, isoform B [Drosophila melanogaster] gi|665391098|ref|NP_001285197.1| uncharacterized protein Dmel_CG15743, isoform C [Drosophila melanogaster] gi|74871679|sp|Q9VYF2.1|IMPA3_DROME RecName: Full=Putative inositol monophosphatase…	NP_572869, NP_001259511, NP_001285197, Q9VYF2, AAF48246, AAO45217, AGB95353, AHN59667	1.35e-99	65.5172	310.842	348	228	P:GO:0007154; C:GO:0012505; P:GO:0046488; P:GO:0016311; P:GO:0044700; F:GO:0052745	P:cell communication; C:endomembrane system; P:phosphatidylinositol metabolic process; P:dephosphorylation; P:single organism signaling; F:inositol phosphate phosphatase activity	P:GO:0046854
TRINITY_GG_2032_c0_g1_i1	Lko057S001131	2	peak	AChain A, Drosophila Msl3 Chromodomain	2484	gi|301015897|pdb|3M9Q|AChain A, Drosophila Msl3 Chromodomain gi|301015898|pdb|3M9Q|B Chain B, Drosophila Msl3 Chromodomain	3M9Q, 3M9Q	3.87e-25	71.9512	101.293	82	59	C:GO:0035267; F:GO:0035064; P:GO:0043486; C:GO:0000228; F:GO:0003682; P:GO:0006342; P:GO:0009047; C:GO:0005700; C:GO:0072487; P:GO:0031936; C:GO:0010369; P:GO:0035206; F:GO:0003729; P:GO:0019233; P:GO:0016573; C:GO:0016456; P:GO:0051304	C:NuA4 histone acetyltransferase complex; F:methylated histone binding; P:histone exchange; C:nuclear chromosome; F:chromatin binding; P:chromatin silencing; P:dosage compensation by hyperactivation of X chromosome; C:polytene chromosome; C:MSL complex; P:negative regulation of chromatin silencing; C:chromocenter; P:regulation of hemocyte proliferation; F:mRNA binding; P:sensory perception of pai…	no GO terms
TRINITY_GG_2024_c0_g1_i1	Lko057S001131	2	peak	ADP-ribosylation factor GTPase activating protein 3	4556	gi|442634188|ref|NP_001097664.2|ADP-ribosylation factor GTPase activating protein 3, isoform H [Drosophila melanogaster] gi|440216196|gb|ABW08581.2| ADP-ribosylation factor GTPase activating protein 3, isoform H [Drosophila melanogaster]	NP_001097664, ABW08581	2.05e-118	60.5217	384.415	575	348	C:GO:0005912; P:GO:0001745; P:GO:0000902; P:GO:0043087; P:GO:0046331; P:GO:0006909; P:GO:0032012; C:GO:0005795	C:adherens junction; P:compound eye morphogenesis; P:cell morphogenesis; P:regulation of GTPase activity; P:lateral inhibition; P:phagocytosis; P:regulation of ARF protein signal transduction; C:Golgi stack	F:GO:0005096
TRINITY_GG_2028_c1_g1_i1	Lko057S001131	2	peak	AF262374_1RNA polymerase III transcription factor BRF [Drosophila melanogaster]	5098	gi|8099212|gb|AAF72065.1|AF262374_1RNA polymerase III transcription factor BRF [Drosophila melanogaster]	AAF72065	2.39e-145	68.0657	464.151	548	373	P:GO:0006383; P:GO:0048812; P:GO:0006352; F:GO:0008134; P:GO:0006359; F:GO:0046933; C:GO:0000276; C:GO:0005811; F:GO:0001046; C:GO:0005667; P:GO:0010906; P:GO:0006909; P:GO:0015986	P:transcription from RNA polymerase III promoter; P:neuron projection morphogenesis; P:DNA-templated transcription, initiation; F:transcription factor binding; P:regulation of transcription from RNA polymerase III promoter; F:proton-transporting ATP synthase activity, rotational mechanism; C:mitochondrial proton-transporting ATP synthase complex, coupling factor F(o); C:lipid particle; F:core pro…	P:GO:0070897; P:GO:0006355; F:GO:0017025
TRINITY_GG_2021_c0_g1_i1	Lko057S001131	2	peak	AF484414_1cytochrome P450 CYP314a1 [Drosophila melanogaster]	2320	gi|33320668|gb|AAQ05972.1|AF484414_1cytochrome P450 CYP314a1 [Drosophila melanogaster]	AAQ05972	1.84e-143	65.8487	433.335	489	322	P:GO:0035165; P:GO:0061331; P:GO:0060288; C:GO:0035003; P:GO:0007252; P:GO:0007494; P:GO:0007451; P:GO:0008340; P:GO:0007295; P:GO:0036099; P:GO:0007498; P:GO:0007015; P:GO:0008587; P:GO:0030708; P:GO:0007298; P:GO:0008347; P:GO:0051489; P:GO:0016330; P:GO:0035155; P:GO:0035157; P:GO:0035074; P:GO:0007460; P:GO:0035153; P:GO:0045456; P:GO:0007422; P:GO:0008356; P:GO:0042067; P:GO:0046667; C:GO:00…	P:embryonic crystal cell differentiation; P:epithelial cell proliferation involved in Malpighian tubule morphogenesis; P:formation of a compartment boundary; C:subapical complex; P:I-kappaB phosphorylation; P:midgut development; P:dorsal/ventral lineage restriction, imaginal disc; P:determination of adult lifespan; P:growth of a germarium-derived egg chamber; P:female germ-line stem cell populati…	F:GO:0016705; F:GO:0005506; P:GO:0055114; F:GO:0020037
TRINITY_GG_2029_c0_g1_i1	Lko057S001131	2	peak	antimeros	2086	gi|21355457|ref|NP_649493.1|antimeros, isoform A [Drosophila melanogaster] gi|442617435|ref|NP_001262263.1| antimeros, isoform B [Drosophila melanogaster] gi|7296819|gb|AAF52095.1| antimeros, isoform A [Drosophila melanogaster] gi|17944277|gb|AAL48032.1| LD37523p [Drosophila melanogaster] gi|440217065|gb|AGB95646.1| antimeros, isoform B [Drosophila melanogaster]	NP_649493, NP_001262263, AAF52095, AAL48032, AGB95646	0	88.8889	586.645	369	328	P:GO:0045893; P:GO:0016570; C:GO:0016593; C:GO:0035327; P:GO:0019233; P:GO:0022008; P:GO:0006368	P:positive regulation of transcription, DNA-templated; P:histone modification; C:Cdc73/Paf1 complex; C:transcriptionally active chromatin; P:sensory perception of pain; P:neurogenesis; P:transcription elongation from RNA polymerase II promoter	P:GO:0016570; C:GO:0016593; P:GO:0006368
TRINITY_GG_2022_c1_g1_i1	Lko057S001131	2	peak	apoptosis 1 inhibitor [Drosophila melanogaster]	2536	gi|1160516|gb|AAC41609.1|apoptosis 1 inhibitor [Drosophila melanogaster] gi|1586949|prf||2205254A DIAP1 protein	AAC41609,	6.72e-53	46.6334	191.43	401	187	P:GO:0000915; P:GO:0007110; P:GO:0007476; F:GO:0061659; F:GO:0002020; P:GO:0007111; P:GO:0007276; P:GO:0022008; C:GO:0000776; C:GO:1990023; P:GO:0048584; P:GO:0000281; P:GO:0043154; P:GO:0002814; P:GO:0045132; P:GO:0000209; P:GO:0042742; P:GO:0007423; C:GO:1990385; P:GO:0022412; F:GO:0004842; F:GO:0004869; C:GO:0005737; P:GO:0046331; C:GO:0032133; P:GO:0030431; P:GO:0031325; P:GO:0090307	P:actomyosin contractile ring assembly; P:meiosis I cytokinesis; P:imaginal disc-derived wing morphogenesis; F:ubiquitin-like protein ligase activity; F:protease binding; P:meiosis II cytokinesis; P:gamete generation; P:neurogenesis; C:kinetochore; C:mitotic spindle midzone; P:positive regulation of response to stimulus; P:mitotic cytokinesis; P:negative regulation of cysteine-type endopeptidase …	no GO terms
TRINITY_GG_2022_c2_g1_i1	Lko057S001131	2	peak	arginine methyltransferase 3	2033	gi|24647025|ref|NP_731984.1|arginine methyltransferase 3, isoform B [Drosophila melanogaster] gi|23171327|gb|AAN13635.1| arginine methyltransferase 3, isoform B [Drosophila melanogaster] gi|27819739|gb|AAO24922.1| SD23052p [Drosophila melanogaster]	NP_731984, AAN13635, AAO24922	1.04e-150	62.8	446.432	500	314	F:GO:0035242; C:GO:0005634; F:GO:0044020; P:GO:0019919; F:GO:0035241; P:GO:0043985	F:protein-arginine omega-N asymmetric methyltransferase activity; C:nucleus; F:histone methyltransferase activity (H4-R3 specific); P:peptidyl-arginine methylation, to asymmetrical-dimethyl arginine; F:protein-arginine omega-N monomethyltransferase activity; P:histone H4-R3 methylation	F:GO:0003676; F:GO:0008168; P:GO:0006479
TRINITY_GG_2025_c3_g1_i1;TRINITY_GG_2025_c4_g1_i1;TRINITY_GG_2025_c6_g1_i1	Lko057S001131	2	peak	AT02241p [Drosophila melanogaster]	701	gi|19527699|gb|AAL89964.1|AT02241p [Drosophila melanogaster]	AAL89964	5.8e-80	75.1111	260.381	225	169	F:GO:0003887;P:GO:0008340;P:GO:0006264;P:GO:0007562;P:GO:0019896;C:GO:0005760;C:GO:0005739;P:GO:0006261;P:GO:0044699	F:DNA-directedDNApolymeraseactivity;P:determinationofadultlifespan;P:mitochondrialDNAreplication;P:eclosion;P:axonaltransportofmitochondrion;C:gammaDNApolymerasecomplex;C:mitochondrion;P:DNA-dependentDNAreplication;P:single-organismprocess	F:GO:0003677;F:GO:0003887;P:GO:0006260;C:GO:0005760;noIPSmatch;F:GO:0003676
TRINITY_GG_2022_c4_g1_i1	Lko057S001131	2	peak	CG2911	647	gi|24644327|ref|NP_649559.1|CG2911, isoform A [Drosophila melanogaster] gi|161078050|ref|NP_001097689.1| CG2911, isoform B [Drosophila melanogaster] gi|7296710|gb|AAF51989.1| CG2911, isoform A [Drosophila melanogaster] gi|47271202|gb|AAT27271.1| RE24848p [Drosophila melanogaster] gi|158030169|gb|ABW08605.1| CG2911, isoform B [Drosophila melanogaster]	NP_649559, NP_001097689, AAF51989, AAT27271, ABW08605	8.94e-10	39.2045	56.9954	176	69	C:GO:0005739; C:GO:0005829; P:GO:0007224; P:GO:0030431; F:GO:0005113	C:mitochondrion; C:cytosol; P:smoothened signaling pathway; P:sleep; F:patched binding	no GO terms
TRINITY_GG_2032_c1_g1_i1	Lko057S001131	2	peak	CG5516	445	gi|21357919|ref|NP_650515.1|CG5516, isoform A [Drosophila melanogaster] gi|320542878|ref|NP_001189228.1| CG5516, isoform B [Drosophila melanogaster] gi|7300088|gb|AAF55257.1| CG5516, isoform A [Drosophila melanogaster] gi|17945444|gb|AAL48776.1| RE18415p [Drosophila melanogaster] gi|318068784|gb|ADV37319.1| CG5516, isoform B [Drosophila melanogaster]	NP_650515, NP_001189228, AAF55257, AAL48776, ADV37319	4.31e-16	82	72.0182	50	41	F:GO:0003676; F:GO:0008270; P:GO:0019233	F:nucleic acid binding; F:zinc ion binding; P:sensory perception of pain	F:GO:0003676; F:GO:0008270
TRINITY_GG_2023_c2_g1_i1	Lko057S001131	2	peak	CG5895	1068	gi|45550631|ref|NP_648828.3|CG5895, isoform A [Drosophila melanogaster] gi|17945168|gb|AAL48643.1| RE10370p [Drosophila melanogaster] gi|45445862|gb|AAF49549.2| CG5895, isoform A [Drosophila melanogaster]	NP_648828, AAL48643, AAF49549	1.2e-47	48.0712	167.933	337	162	F:GO:0047396; P:GO:0006629; P:GO:0006650; F:GO:0008081	F:glycosylphosphatidylinositol diacylglycerol-lyase activity; P:lipid metabolic process; P:glycerophospholipid metabolic process; F:phosphoric diester hydrolase activity	P:GO:0006629; F:GO:0008081
TRINITY_GG_2030_c0_g1_i1	Lko057S001131	2	peak	coenzyme Q biosynthesis protein 2 [Drosophila melanogaster]	1707	gi|21355567|ref|NP_649789.1|coenzyme Q biosynthesis protein 2 [Drosophila melanogaster] gi|74869153|sp|Q9VHS7.1|COQ2_DROME RecName: Full=4-hydroxybenzoate polyprenyltransferase, mitochondrial; Short=4-HB polyprenyltransferase; AltName: Full=Coenzyme Q biosynthesis protein 2; AltName: Full=Para-hydroxybenzoate--polyprenyltransferase; Short=PHB:PPT; Short=PHB:polyprenyltransferase; Flags: Precursor…	NP_649789, Q9VHS7, AAF54222, AAL90092	3.94e-121	78.777	363.614	278	219	P:GO:0050829; P:GO:0008340; P:GO:0006360; F:GO:0008412; P:GO:0048009; P:GO:0006744; C:GO:0005666; C:GO:0005743; C:GO:0005736; F:GO:0003899; C:GO:0016021; P:GO:0050832; P:GO:0050830	P:defense response to Gram-negative bacterium; P:determination of adult lifespan; P:transcription from RNA polymerase I promoter; F:4-hydroxybenzoate octaprenyltransferase activity; P:insulin-like growth factor receptor signaling pathway; P:ubiquinone biosynthetic process; C:DNA-directed RNA polymerase III complex; C:mitochondrial inner membrane; C:DNA-directed RNA polymerase I complex; F:DNA-dir…	F:GO:0004659; C:GO:0016021; P:GO:0006744; F:GO:0016765
TRINITY_GG_2026_c0_g1_i3	Lko057S001131	2	peak	glutathione S transferase D11	932	gi|24646259|ref|NP_650183.1|glutathione S transferase D11, isoform A [Drosophila melanogaster] gi|19527623|gb|AAL89926.1| RE72392p [Drosophila melanogaster] gi|23171095|gb|AAF54795.2| glutathione S transferase D11, isoform A [Drosophila melanogaster]	NP_650183, AAL89926, AAF54795	4.83e-51	61.7801	169.088	191	118	P:GO:0009408; F:GO:0004602; P:GO:0006749; P:GO:0019233; F:GO:0004364	P:response to heat; F:glutathione peroxidase activity; P:glutathione metabolic process; P:sensory perception of pain; F:glutathione transferase activity	F:GO:0005515
TRINITY_GG_2026_c0_g1_i2	Lko057S001131	2	peak	glutathione S transferase E1 [Drosophila melanogaster]	932	gi|19922526|ref|NP_611323.1|glutathione S transferase E1 [Drosophila melanogaster] gi|7302620|gb|AAF57701.1| glutathione S transferase E1 [Drosophila melanogaster] gi|7620516|gb|AAF64647.1| glutathione S-transferase [Drosophila melanogaster] gi|16183015|gb|AAL13612.1| GH14654p [Drosophila melanogaster]	NP_611323, AAF57701, AAF64647, AAL13612	1.1e-50	61.9048	168.318	189	117	P:GO:0009408; P:GO:0006749; P:GO:0019233; F:GO:0004364; P:GO:0022008; F:GO:0018833	P:response to heat; P:glutathione metabolic process; P:sensory perception of pain; F:glutathione transferase activity; P:neurogenesis; F:DDT-dehydrochlorinase activity
TRINITY_GG_2028_c2_g1_i1	Lko057S001131	2	peak	loki	3278	gi|17137306|ref|NP_477219.1|loki, isoform A [Drosophila melanogaster] gi|27923796|sp|O61267.1|LOK_DROME RecName: Full=Ovarian-specific serine/threonine-protein kinase Lok; AltName: Full=Protein loki; AltName: Full=dMNK gi|3204496|dbj|BAA28755.1| long form of nuclear kinase [Drosophila melanogaster] gi|22946886|gb|AAF53867.2| loki, isoform A [Drosophila melanogaster]	NP_477219, O61267, BAA28755, AAF53867	2.02e-51	57.1885	189.889	313	179	P:GO:0007281; P:GO:0065008; P:GO:0035234; P:GO:0006282; P:GO:0044773; P:GO:0008630; F:GO:0004674; F:GO:0005488; F:GO:0050321; C:GO:0005634; P:GO:0010906; C:GO:0005737; P:GO:0006919	P:germ cell development; P:regulation of biological quality; P:ectopic germ cell programmed cell death; P:regulation of DNA repair; P:mitotic DNA damage checkpoint; P:intrinsic apoptotic signaling pathway in response to DNA damage; F:protein serine/threonine kinase activity; F:binding; F:tau-protein kinase activity; C:nucleus; P:regulation of glucose metabolic process; C:cytoplasm; P:activation o…	F:GO:0005524; F:GO:0004672; P:GO:0006468
TRINITY_GG_2026_c0_g1_i1	Lko057S001131	2	peak	MIP15314p [Drosophila melanogaster]	933	gi|283135260|gb|ADB11090.1|MIP15314p [Drosophila melanogaster]	ADB11090	5.68e-50	67.3684	166.777	190	128	P:GO:0009408; F:GO:0004602; P:GO:0006749; P:GO:0019233; F:GO:0004364; F:GO:0018833	P:response to heat; F:glutathione peroxidase activity; P:glutathione metabolic process; P:sensory perception of pain; F:glutathione transferase activity; F:DDT-dehydrochlorinase activity	F:GO:0005515
TRINITY_GG_2025_c1_g1_i1	Lko057S001131	2	peak	mitochondrial DNA polymerase catalytic subunit precursor [Drosophila melanogaster]	1277	gi|2289912|gb|AAC47658.1|mitochondrial DNA polymerase catalytic subunit precursor [Drosophila melanogaster]	AAC47658	3.52e-27	81.25	115.546	80	65	F:GO:0003677; F:GO:0003887; P:GO:0008340; P:GO:0006264; P:GO:0007562; P:GO:0019896; C:GO:0005760	F:DNA binding; F:DNA-directed DNA polymerase activity; P:determination of adult lifespan; P:mitochondrial DNA replication; P:eclosion; P:axonal transport of mitochondrion; C:gamma DNA polymerase complex	no IPS match
TRINITY_GG_2022_c3_g1_i1	Lko057S001131	2	peak	nucleostemin 2 [Drosophila melanogaster]	2347	gi|19922460|ref|NP_611232.1|nucleostemin 2 [Drosophila melanogaster] gi|16588709|gb|AAL26879.1|AF315579_1 nuclear GTP binding protein [Drosophila melanogaster] gi|7302756|gb|AAF57834.1| nucleostemin 2 [Drosophila melanogaster] gi|19528647|gb|AAL90438.1| SD10213p [Drosophila melanogaster]	NP_611232, AAL26879, AAF57834, AAL90438	0	67.5378	769.229	727	491	P:GO:0051168; C:GO:0005737; P:GO:0001745; F:GO:0003924; P:GO:0006909; P:GO:0042254; C:GO:0005730; P:GO:0009987; P:GO:0040018; C:GO:0005654	P:nuclear export; C:cytoplasm; P:compound eye morphogenesis; F:GTPase activity; P:phagocytosis; P:ribosome biogenesis; C:nucleolus; P:cellular process; P:positive regulation of multicellular organism growth; C:nucleoplasm	F:GO:0005525
TRINITY_GG_2021_c1_g1_i1	Lko057S001131	2	peak	PREDICTED: piggyBac transposable element-derived protein 4-like	2439	gi|410929519|ref|XP_003978147.1|PREDICTED: piggyBac transposable element-derived protein 4-like, partial [Takifugu rubripes]	XP_003978147	5.07e-14	60.274	59.3066	73	44	C:GO:0016020; C:GO:0016021	C:membrane; C:integral component of membrane	no IPS match
TRINITY_GG_2026_c1_g1_i1;TRINITY_GG_2026_c1_g1_i2	Lko057S001131	2	peak	RE38818p [Drosophila melanogaster]	2993	gi|25012581|gb|AAN71390.1|RE38818p [Drosophila melanogaster]	AAN71390	3.08e-75	71.0526	252.292	266	189	P:GO:0035561;F:GO:0016538;P:GO:0009794;P:GO:0007096;P:GO:0035186;P:GO:0045841;P:GO:0007422;C:GO:0005634;F:GO:0005515;P:GO:0046331;C:GO:0005819;P:GO:0000070;P:GO:0019233;P:GO:0055059;C:GO:0045170	P:regulationofchromatinbinding;F:cyclin-dependentproteinserine/threoninekinaseregulatoractivity;P:regulationofmitoticcellcycle,embryonic;P:regulationofexitfrommitosis;P:syncytialblastodermmitoticcellcycle;P:negativeregulationofmitoticmetaphase/anaphasetransition;P:peripheralnervoussystemdevelopment;C:nucleus;F:proteinbinding;P:lateralinhibition;C:spindle;P:mitoticsisterchromatidsegregation;P:sens…	C:GO:0005634
TRINITY_GG_2023_c1_g1_i1	Lko057S001131	2	peak	Rrp45	1104	gi|24642649|ref|NP_573163.1|Rrp45, isoform A [Drosophila melanogaster] gi|665391953|ref|NP_001285353.1| Rrp45, isoform B [Drosophila melanogaster] gi|19527801|gb|AAL90015.1| AT07738p [Drosophila melanogaster] gi|22832411|gb|AAF48665.2| Rrp45, isoform A [Drosophila melanogaster] gi|599138085|gb|AHN59823.1| Rrp45, isoform B [Drosophila melanogaster]	NP_573163, NP_001285353, AAL90015, AAF48665, AHN59823	1.01e-18	45.5882	87.8113	272	124	C:GO:0044424	C:intracellular part	no GO terms
TRINITY_GG_2023_c0_g1_i1	Lko057S001131	2	peak	transport and golgi organization 7	2088	gi|19922220|ref|NP_610932.1|transport and golgi organization 7, isoform A [Drosophila melanogaster] gi|665400824|ref|NP_001286407.1| transport and golgi organization 7, isoform B [Drosophila melanogaster] gi|122126264|sp|Q7JVI3.1|EIF3M_DROME RecName: Full=Eukaryotic translation initiation factor 3 subunit M; Short=eIF3m; AltName: Full=Transport and Golgi organization protein 7; Short=Tango-7 gi|7…	NP_610932, NP_001286407, Q7JVI3, AAF58289, AAM50784, AHN56205	9.16e-178	81.2987	512.686	385	313	P:GO:2001272; P:GO:0007291; P:GO:0007030; P:GO:0048812; C:GO:0005794; P:GO:0009306; C:GO:0005875; C:GO:0005852; P:GO:0006412; F:GO:0003743; C:GO:0043293; P:GO:0097202; F:GO:0031369; P:GO:2001233; C:GO:0070865	P:positive regulation of cysteine-type endopeptidase activity involved in execution phase of apoptosis; P:sperm individualization; P:Golgi organization; P:neuron projection morphogenesis; C:Golgi apparatus; P:protein secretion; C:microtubule associated complex; C:eukaryotic translation initiation factor 3 complex; P:translation; F:translation initiation factor activity; C:apoptosome; P:activation…	F:GO:0003743; F:GO:0005515; C:GO:0005737; C:GO:0005852
TRINITY_GG_2022_c7_g1_i1	Lko057S001131	2	peak	transposase [Drosophila melanogaster]	208	gi|1006789|gb|AAC47095.1|transposase [Drosophila melanogaster]	AAC47095	7.68e-05	51.9231	39.2762	52	27			no IPS match
TRINITY_GG_2027_c0_g1_i1	Lko057S001131	2	peak	uncharacterized protein Dmel_CG14671	1830	gi|24644274|ref|NP_649550.1|uncharacterized protein Dmel_CG14671, isoform A [Drosophila melanogaster] gi|442617579|ref|NP_001262288.1| uncharacterized protein Dmel_CG14671, isoform B [Drosophila melanogaster] gi|7296730|gb|AAF52009.1| uncharacterized protein Dmel_CG14671, isoform A [Drosophila melanogaster] gi|440217098|gb|AGB95671.1| uncharacterized protein Dmel_CG14671, isoform B [Drosophila me…	NP_649550, NP_001262288, AAF52009, AGB95671, ANY27884	1.36e-07	47.0238	52.373	168	79			no GO terms
TRINITY_GG_2025_c0_g1_i1	Lko057S001131	2	peak	uncharacterized protein Dmel_CG31957	998	gi|24581558|ref|NP_722949.1|uncharacterized protein Dmel_CG31957, isoform A [Drosophila melanogaster] gi|442625793|ref|NP_001260011.1| uncharacterized protein Dmel_CG31957, isoform B [Drosophila melanogaster] gi|74865019|sp|Q8IQ13.1|EIF1A_DROME RecName: Full=Probable RNA-binding protein EIF1AD; AltName: Full=Eukaryotic translation initiation factor 1A domain-containing protein gi|22945262|gb|AAN1…	NP_722949, NP_001260011, Q8IQ13, AAN10365, ABG02155, AGB92547, AOG29612	9.33e-38	66.6667	133.265	135	90	F:GO:0003743; C:GO:0016282; P:GO:0006909; C:GO:0005829; P:GO:0007224; P:GO:0006413; C:GO:0005575; C:GO:0005654; P:GO:0006412	F:translation initiation factor activity; C:eukaryotic 43S preinitiation complex; P:phagocytosis; C:cytosol; P:smoothened signaling pathway; P:translational initiation; C:cellular_component; C:nucleoplasm; P:translation	F:GO:0003743; F:GO:0003723; P:GO:0006413
TRINITY_GG_2028_c0_g1_i1	Lko057S001131	2	peak	uncharacterized protein Dmel_CG33129	3281	gi|28574516|ref|NP_788023.1|uncharacterized protein Dmel_CG33129, isoform E [Drosophila melanogaster] gi|665407522|ref|NP_001285820.1| uncharacterized protein Dmel_CG33129, isoform F [Drosophila melanogaster] gi|28317328|gb|AAO39660.1| AT01533p [Drosophila melanogaster] gi|28380342|gb|AAF53037.2| uncharacterized protein Dmel_CG33129, isoform E [Drosophila melanogaster] gi|599125278|gb|AHN54334.1|…	NP_788023, NP_001285820, AAO39660, AAF53037, AHN54334	1.02e-39	43.8108	158.688	719	315	C:GO:0005811; P:GO:0055093; C:GO:0012505; F:GO:0003674	C:lipid particle; P:response to hyperoxia; C:endomembrane system; F:molecular_function	no GO terms
TRINITY_GG_467_c3_g1_i1;TRINITY_GG_467_c6_g1_i1;TRINITY_GG_470_c0_g1_i1	Lko057S000793	3	flanking	CG5278 [Drosophila melanogaster]	1828	gi|24649059|ref|NP_651063.1|CG5278 [Drosophila melanogaster] gi|7300878|gb|AAF56019.1| CG5278 [Drosophila melanogaster] gi|532691860|gb|AGT99993.1| FI24088p1 [Drosophila melanogaster]	NP_651063, AAF56019, AGT99993	9.75e-124	81.9608	368.237	255	209	P:GO:0007051;P:GO:0022607;P:GO:0022008;P:GO:0006694;P:GO:0035209;P:GO:0006633;P:GO:0033206;P:GO:0042632;P:GO:0007126;P:GO:0042811;P:GO:0000915;P:GO:0007110;P:GO:0007111;P:GO:0042761;P:GO:0007112;F:GO:0009922;P:GO:0000212;P:GO:0051225;P:GO:0030497;P:GO:0042759;C:GO:0016021;P:GO:0019368	P:spindleorganization;P:cellularcomponentassembly;P:neurogenesis;P:steroidbiosyntheticprocess;P:pupaldevelopment;P:fattyacidbiosyntheticprocess;P:meioticcytokinesis;P:cholesterolhomeostasis;P:meioticnucleardivision;P:pheromonebiosyntheticprocess;P:actomyosincontractileringassembly;P:meiosisIcytokinesis;P:meiosisIIcytokinesis;P:verylong-chainfattyacidbiosyntheticprocess;P:malemeiosiscytokinesis;F:…	C:GO:0016021
TRINITY_GG_467_c7_g1_i1	Lko057S000793	3	flanking	GH27647p [Drosophila melanogaster]	600	gi|289526381|gb|ADD01313.1|GH27647p [Drosophila melanogaster]	ADD01313	4.89e-18	52.7607	81.2629	163	86	P:GO:0007051; P:GO:0065008; P:GO:0007275; P:GO:0022607; P:GO:0030497; P:GO:0033206; P:GO:0007126	P:spindle organization; P:regulation of biological quality; P:multicellular organism development; P:cellular component assembly; P:fatty acid elongation; P:meiotic cytokinesis; P:meiotic nuclear division	C:GO:0016021
TRINITY_GG_472_c0_g1_i1	Lko057S000793	3	flanking	james bond	1077	gi|24649055|ref|NP_732761.1|james bond, isoform A [Drosophila melanogaster] gi|24649057|ref|NP_732762.1| james bond, isoform C [Drosophila melanogaster] gi|28571825|ref|NP_651062.3| james bond, isoform B [Drosophila melanogaster] gi|7300877|gb|AAF56018.1| james bond, isoform A [Drosophila melanogaster] gi|16769022|gb|AAL28730.1| LD14839p [Drosophila melanogaster] gi|23171974|gb|AAN13911.1| james …	NP_732761, NP_732762, NP_651062, AAF56018, AAL28730, AAN13911, AAN13910	1.42e-99	72.2433	298.516	263	190	P:GO:0042811; P:GO:0042759; P:GO:0000915; P:GO:0007110; P:GO:0007111; P:GO:0022008; P:GO:0042761; P:GO:0006694; P:GO:0007112; F:GO:0009922; P:GO:0042632; P:GO:0000212; P:GO:0051225; C:GO:0016021; P:GO:0019368; P:GO:0035209	P:pheromone biosynthetic process; P:long-chain fatty acid biosynthetic process; P:actomyosin contractile ring assembly; P:meiosis I cytokinesis; P:meiosis II cytokinesis; P:neurogenesis; P:very long-chain fatty acid biosynthetic process; P:steroid biosynthetic process; P:male meiosis cytokinesis; F:fatty acid elongase activity; P:cholesterol homeostasis; P:meiotic spindle organization; P:spindle …	C:GO:0016021
TRINITY_GG_467_c2_g1_i1;TRINITY_GG_467_c4_g1_i1	Lko057S000793	3	flanking	MIP22174p [Drosophila melanogaster]	2065	gi|302393609|gb|ADL32750.1|MIP22174p [Drosophila melanogaster]	ADL32750	7.09e-101	75	311.227	256	192	P:GO:0042811;P:GO:0000915;P:GO:0007110;P:GO:0007111;P:GO:0022008;P:GO:0042761;P:GO:0006694;P:GO:0007112;F:GO:0009922;P:GO:0042632;P:GO:0000212;P:GO:0051225;P:GO:0030497;P:GO:0035209;P:GO:0042759;P:GO:0019368	P:pheromonebiosyntheticprocess;P:actomyosincontractileringassembly;P:meiosisIcytokinesis;P:meiosisIIcytokinesis;P:neurogenesis;P:verylong-chainfattyacidbiosyntheticprocess;P:steroidbiosyntheticprocess;P:malemeiosiscytokinesis;F:fattyacidelongaseactivity;P:cholesterolhomeostasis;P:meioticspindleorganization;P:spindleassembly;P:fattyacidelongation;P:pupaldevelopment;P:long-chainfattyacidbiosyntheti…	C:GO:0016021
TRINITY_GG_468_c0_g1_i1	Lko057S000793	3	flanking	mitochondrial ribosomal protein L55 [Drosophila melanogaster]	670	gi|21356717|ref|NP_650780.1|mitochondrial ribosomal protein L55 [Drosophila melanogaster] gi|74868572|sp|Q9VE04.1|RM55_DROME RecName: Full=39S ribosomal protein L55, mitochondrial; Short=L55mt; Short=MRP-L55; Flags: Precursor gi|7300477|gb|AAF55632.1| mitochondrial ribosomal protein L55 [Drosophila melanogaster] gi|9501241|emb|CAB99479.1| putative transcription factor [Drosophila melanogaster] gi…	NP_650780, Q9VE04, AAF55632, CAB99479, AAL49308	7.9e-31	80.7229	110.538	83	67	F:GO:0003735; P:GO:0032543; C:GO:0005762	F:structural constituent of ribosome; P:mitochondrial translation; C:mitochondrial large ribosomal subunit	F:GO:0003735; C:GO:0005762
TRINITY_GG_467_c1_g1_i1	Lko057S000793	3	flanking	uncharacterized protein Dmel_CG31522	1699	gi|28573242|ref|NP_730843.2|uncharacterized protein Dmel_CG31522, isoform A [Drosophila melanogaster] gi|386765078|ref|NP_001246907.1| uncharacterized protein Dmel_CG31522, isoform G [Drosophila melanogaster] gi|442617372|ref|NP_001246905.2| uncharacterized protein Dmel_CG31522, isoform H [Drosophila melanogaster] gi|28381135|gb|AAF52122.3| uncharacterized protein Dmel_CG31522, isoform A [Drosoph…	NP_730843, NP_001246907, NP_001246905, AAF52122, AAX33543, ADN95588, AFH06226, AFH06224	1.59e-33	57.2093	132.109	215	123	P:GO:0065008; P:GO:0007275; P:GO:0008610; P:GO:0044763; P:GO:0044237	P:regulation of biological quality; P:multicellular organism development; P:lipid biosynthetic process; P:single-organism cellular process; P:cellular metabolic process	C:GO:0016021
TRINITY_GG_7435_c1_g1_i1	Lko057S000482	3	LOD1	CG8134	2103	gi|24642247|ref|NP_573056.1|CG8134, isoform A [Drosophila melanogaster] gi|665391547|ref|NP_001285283.1| CG8134, isoform B [Drosophila melanogaster] gi|7293107|gb|AAF48492.1| CG8134, isoform A [Drosophila melanogaster] gi|20151377|gb|AAM11048.1| GH09650p [Drosophila melanogaster] gi|599138006|gb|AHN59753.1| CG8134, isoform B [Drosophila melanogaster]	NP_573056, NP_001285283, AAF48492, AAM11048, AHN59753	1.92e-10	42.5743	63.929	202	86	P:GO:0008150; C:GO:0005575; F:GO:0003674	P:biological_process; C:cellular_component; F:molecular_function	F:GO:0005515
TRINITY_GG_7435_c3_g1_i1	Lko057S000482	3	LOD1	Dihydrodipicolinate synthase-like, mitochondrial [Zootermopsis nevadensis]	1289	gi|646713382|gb|KDR17756.1|Dihydrodipicolinate synthase-like, mitochondrial [Zootermopsis nevadensis]	KDR17756	3.8e-139	82.4324	408.683	296	244	C:GO:0016020; P:GO:0008152; F:GO:0016829	C:membrane; P:metabolic process; F:lyase activity	F:GO:0003824; P:GO:0008152; F:GO:0016829
TRINITY_GG_7437_c0_g1_i1	Lko057S000482	3	LOD1	mitochondrial ribosomal protein L12 [Drosophila melanogaster]	902	gi|17864338|ref|NP_524742.1|mitochondrial ribosomal protein L12 [Drosophila melanogaster] gi|7295020|gb|AAF50348.1| mitochondrial ribosomal protein L12 [Drosophila melanogaster] gi|16768400|gb|AAL28419.1| GM03767p [Drosophila melanogaster] gi|18447504|gb|AAL68314.1| RE53508p [Drosophila melanogaster]	NP_524742, AAF50348, AAL28419, AAL68314	7.99e-28	85.3333	107.071	75	64	C:GO:0005811; F:GO:0003735; P:GO:0019233; P:GO:0032543; F:GO:0003682; C:GO:0005763; C:GO:0005762; P:GO:0007005; P:GO:0016049	C:lipid particle; F:structural constituent of ribosome; P:sensory perception of pain; P:mitochondrial translation; F:chromatin binding; C:mitochondrial small ribosomal subunit; C:mitochondrial large ribosomal subunit; P:mitochondrion organization; P:cell growth	F:GO:0003735; C:GO:0005840; C:GO:0005622; P:GO:0006412
TRINITY_GG_7435_c0_g1_i1;TRINITY_GG_7435_c0_g1_i2	Lko057S000482	3	LOD1	patsas protein [Drosophila melanogaster]	2051	gi|6002770|gb|AAF00133.1|patsas protein [Drosophila melanogaster]	AAF00133	1.37e-06	54.0541	52.373	74	40	C:GO:0005794;C:GO:0042734;F:GO:0008381;P:GO:0009270;C:GO:0043025;C:GO:0045169;P:GO:0045887;P:GO:0007016;P:GO:0007605;P:GO:0007528;C:GO:0030425;F:GO:0030506;C:GO:0043195;C:GO:0031594;C:GO:0034703;P:GO:0050954;C:GO:0045170;P:GO:0008150;F:GO:0019706;F:GO:0008270;P:GO:0000226;C:GO:0005886;P:GO:0007614;P:GO:0019233;P:GO:0018345;P:GO:1900074;P:GO:0040011;C:GO:0044214;C:GO:0005575;F:GO:0003674;P:GO:0006…	C:Golgiapparatus;C:presynapticmembrane;F:mechanically-gatedionchannelactivity;P:responsetohumidity;C:neuronalcellbody;C:fusome;P:positiveregulationofsynapticgrowthatneuromuscularjunction;P:cytoskeletalanchoringatplasmamembrane;P:sensoryperceptionofsound;P:neuromuscularjunctiondevelopment;C:dendrite;F:ankyrinbinding;C:terminalbouton;C:neuromuscularjunction;C:cationchannelcomplex;P:sensoryperceptio…	F:GO:0005515
TRINITY_GG_7435_c4_g1_i1	Lko057S000482	3	LOD1	U2 small nuclear riboprotein auxiliary factor 50	2262	gi|386764548|ref|NP_001245708.1|U2 small nuclear riboprotein auxiliary factor 50, isoform B [Drosophila melanogaster] gi|383293438|gb|AFH07421.1| U2 small nuclear riboprotein auxiliary factor 50, isoform B [Drosophila melanogaster]	NP_001245708, AFH07421	0	93.3333	610.912	375	350	C:GO:0089701; F:GO:0008187; P:GO:0036093; P:GO:0060856; P:GO:0022008; P:GO:0060968; P:GO:0046833; C:GO:0005654; P:GO:0000398; F:GO:0000166; F:GO:0005515; P:GO:0051168; C:GO:0071013; P:GO:0000381; P:GO:0048477; C:GO:0071011; F:GO:0003729; P:GO:0033119	C:U2AF; F:poly-pyrimidine tract binding; P:germ cell proliferation; P:establishment of blood-brain barrier; P:neurogenesis; P:regulation of gene silencing; P:positive regulation of RNA export from nucleus; C:nucleoplasm; P:mRNA splicing, via spliceosome; F:nucleotide binding; F:protein binding; P:nuclear export; C:catalytic step 2 spliceosome; P:regulation of alternative mRNA splicing, via splice…	F:GO:0003676; C:GO:0005634; F:GO:0003723; P:GO:0006397
TRINITY_GG_7436_c1_g1_i1	Lko057S000482	3	LOD1	uncharacterized protein Dmel_CG13704 [Drosophila melanogaster]	635	gi|24658088|ref|NP_647939.1|uncharacterized protein Dmel_CG13704 [Drosophila melanogaster] gi|19527579|gb|AAL89904.1| RE40159p [Drosophila melanogaster] gi|23093043|gb|AAF47950.2| uncharacterized protein Dmel_CG13704 [Drosophila melanogaster] gi|1049300443|gb|ANY27165.1| GEO07727p1, partial [Drosophila melanogaster]	NP_647939, AAL89904, AAF47950, ANY27165	1.44e-14	63.9535	68.5514	86	55			no IPS match
TRINITY_GG_615_c0_g1_i1	Lko057S000834	3	LOD2	CG9259	1565	gi|24585572|ref|NP_610084.1|CG9259, isoform A [Drosophila melanogaster] gi|442628711|ref|NP_001260658.1| CG9259, isoform B [Drosophila melanogaster] gi|442628713|ref|NP_001260659.1| CG9259, isoform C [Drosophila melanogaster] gi|7298745|gb|AAF53956.1| CG9259, isoform A [Drosophila melanogaster] gi|345441846|gb|AEN86879.1| IP12580p1 [Drosophila melanogaster] gi|440214026|gb|AGB93193.1| CG9259, iso…	NP_610084, NP_001260658, NP_001260659, AAF53956, AEN86879, AGB93193, AGB93194	7.97e-38	48.8432	144.821	389	190	P:GO:0008150; C:GO:0005575; F:GO:0003674	P:biological_process; C:cellular_component; F:molecular_function	no GO terms
TRINITY_GG_613_c1_g1_i1	Lko057S000834	3	LOD2	dipeptidase B	1941	gi|21358201|ref|NP_650318.1|dipeptidase B, isoform A [Drosophila melanogaster] gi|24646701|ref|NP_731863.1| dipeptidase B, isoform B [Drosophila melanogaster] gi|24646703|ref|NP_731864.1| dipeptidase B, isoform C [Drosophila melanogaster] gi|665394012|ref|NP_001287316.1| dipeptidase B, isoform D [Drosophila melanogaster] gi|15292163|gb|AAK93350.1| LD41062p [Drosophila melanogaster] gi|23171217|gb…	NP_650318, NP_731863, NP_731864, NP_001287316, AAK93350, AAF54991, AAN13593, AAN13594, AHN57315	7.13e-171	68.9453	498.049	512	353	F:GO:0008240; P:GO:0006508; F:GO:0008239	F:tripeptidyl-peptidase activity; P:proteolysis; F:dipeptidyl-peptidase activity	P:GO:0019538; C:GO:0005737; P:GO:0006508; F:GO:0008235; F:GO:0004177; F:GO:0030145; C:GO:0005622
TRINITY_GG_614_c0_g1_i1	Lko057S000834	3	LOD2	GH03753p [Drosophila melanogaster]	598	gi|15010430|gb|AAK77263.1|GH03753p [Drosophila melanogaster]	AAK77263	2.67e-12	57.4713	65.855	87	50			no IPS match
TRINITY_GG_610_c0_g1_i1	Lko057S000834	3	LOD2	nuclear factor Y-box C [Drosophila melanogaster]	2251	gi|24640233|ref|NP_572354.1|nuclear factor Y-box C [Drosophila melanogaster] gi|7290758|gb|AAF46204.1| nuclear factor Y-box C [Drosophila melanogaster] gi|25012612|gb|AAN71404.1| RE43755p [Drosophila melanogaster]	NP_572354, AAF46204, AAN71404	1.06e-40	80.5825	159.073	103	83	C:GO:0016602; F:GO:0003700; F:GO:0046982; P:GO:0006355; P:GO:0007411; F:GO:0043565; P:GO:0006974	C:CCAAT-binding factor complex; F:transcription factor activity, sequence-specific DNA binding; F:protein heterodimerization activity; P:regulation of transcription, DNA-templated; P:axon guidance; F:sequence-specific DNA binding; P:cellular response to DNA damage stimulus	F:GO:0046982
TRINITY_GG_610_c1_g1_i1	Lko057S000834	3	LOD2	penguin [Drosophila melanogaster]	3026	gi|17737375|ref|NP_523429.1|penguin [Drosophila melanogaster] gi|6831590|sp|O61345.1|PEN_DROME RecName: Full=Protein penguin gi|3004656|gb|AAC28403.1| penguin [Drosophila melanogaster] gi|4972716|gb|AAD34753.1| unknown [Drosophila melanogaster] gi|7295515|gb|AAF50828.1| penguin [Drosophila melanogaster]	NP_523429, O61345, AAC28403, AAD34753, AAF50828	4.22e-59	57.1429	217.624	413	236	P:GO:0007475	P:apposition of dorsal and ventral imaginal disc-derived wing surfaces	F:GO:0003723; F:GO:0005488
TRINITY_GG_617_c0_g1_i1	Lko057S000834	3	LOD2	peroxiredoxin 3 [Drosophila melanogaster]	1214	gi|17738015|ref|NP_524387.1|peroxiredoxin 3 [Drosophila melanogaster] gi|11935114|gb|AAG41976.1|AF311747_1 thioredoxin peroxidase 3 [Drosophila melanogaster] gi|23171565|gb|AAF55431.2| peroxiredoxin 3 [Drosophila melanogaster] gi|29335975|gb|AAO74686.1| SD08737p [Drosophila melanogaster]	NP_524387, AAG41976, AAF55431, AAO74686	9.88e-94	75.8772	281.952	228	173	P:GO:0008340; P:GO:0042594; P:GO:0097190; P:GO:0007155; C:GO:0005875; P:GO:0006979; C:GO:0070062; P:GO:2001269; C:GO:0005829; P:GO:0007281; F:GO:0008379; C:GO:0005783; P:GO:0045454; P:GO:0008354; P:GO:0006974; P:GO:0042742; P:GO:0042744; P:GO:0046427; C:GO:0005615; F:GO:0004602; F:GO:0005515; P:GO:0010906; P:GO:0043066; C:GO:0005739; P:GO:0006909; P:GO:0070417	P:determination of adult lifespan; P:response to starvation; P:apoptotic signaling pathway; P:cell adhesion; C:microtubule associated complex; P:response to oxidative stress; C:extracellular exosome; P:positive regulation of cysteine-type endopeptidase activity involved in apoptotic signaling pathway; C:cytosol; P:germ cell development; F:thioredoxin peroxidase activity; C:endoplasmic reticulum; …	F:GO:0016209; F:GO:0016491; P:GO:0055114; P:GO:0045454; F:GO:0051920
TRINITY_GG_613_c2_g1_i1	Lko057S000834	3	LOD2	uncharacterized protein Dmel_CG13611 [Drosophila melanogaster]	1630	gi|24649620|ref|NP_651239.1|uncharacterized protein Dmel_CG13611 [Drosophila melanogaster] gi|7301139|gb|AAF56272.1| uncharacterized protein Dmel_CG13611 [Drosophila melanogaster] gi|21483196|gb|AAM52573.1| AT01267p [Drosophila melanogaster]	NP_651239, AAF56272, AAM52573	2.06e-22	42.7386	101.293	482	206	P:GO:0016458; P:GO:0070828; P:GO:0008593; P:GO:0007474; P:GO:0006325; F:GO:0003677; C:GO:0005634; F:GO:0016491; F:GO:0050660; P:GO:0048477; C:GO:0017053; P:GO:0034720; P:GO:0055114; F:GO:0032453; P:GO:0090309	P:gene silencing; P:heterochromatin organization; P:regulation of Notch signaling pathway; P:imaginal disc-derived wing vein specification; P:chromatin organization; F:DNA binding; C:nucleus; F:oxidoreductase activity; F:flavin adenine dinucleotide binding; P:oogenesis; C:transcriptional repressor complex; P:histone H3-K4 demethylation; P:oxidation-reduction process; F:histone demethylase activit…	F:GO:0016491; P:GO:0055114
TRINITY_GG_611_c0_g1_i1;TRINITY_GG_611_c0_g1_i2;TRINITY_GG_611_c0_g1_i3	Lko057S000834	3	LOD2	uncharacterized protein Dmel_CG43320 [Drosophila melanogaster]	1503	gi|386766644|ref|NP_651581.2|uncharacterized protein Dmel_CG43320 [Drosophila melanogaster] gi|383292992|gb|AAF56739.3| uncharacterized protein Dmel_CG43320 [Drosophila melanogaster]	NP_651581, AAF56739	5.18e-55	48.5651	190.274	453	220	P:GO:0008150;C:GO:0005575;F:GO:0003674;C:GO:0005634;P:GO:0000086;F:GO:0003682	P:biological_process;C:cellular_component;F:molecular_function;C:nucleus;P:G2/Mtransitionofmitoticcellcycle;F:chromatinbinding	noGOterms
TRINITY_GG_608_c0_g1_i1	Lko057S000834	3	LOD2	XK-related [Drosophila melanogaster]	3688	gi|46949015|gb|AAT07395.1|XK-related [Drosophila melanogaster]	AAT07395	7.69e-17	49.4118	84.7297	255	126	C:GO:0016021	C:integral component of membrane	C:GO:0016021
TRINITY_GG_2748_c0_g1_i1	Lko057S001272	3	LOD2	AT03371p [Drosophila melanogaster]	2380	gi|19527743|gb|AAL89986.1|AT03371p [Drosophila melanogaster]	AAL89986	6.41e-157	59.66	475.707	647	386	P:GO:0007275; P:GO:0006464; C:GO:0005681; C:GO:0043232; C:GO:0043234; P:GO:1902533; P:GO:0006325; C:GO:1990234; P:GO:0010604; C:GO:0044451; P:GO:0010468; P:GO:0030154; P:GO:0031325; P:GO:0080090; P:GO:0050896	P:multicellular organism development; P:cellular protein modification process; C:spliceosomal complex; C:intracellular non-membrane-bounded organelle; C:protein complex; P:positive regulation of intracellular signal transduction; P:chromatin organization; C:transferase complex; P:positive regulation of macromolecule metabolic process; C:nucleoplasm part; P:regulation of gene expression; P:cell di…	F:GO:0005515
TRINITY_GG_2752_c0_g1_i1	Lko057S001272	3	LOD2	AT04875p	4432	gi|28317324|gb|AAO39658.1|AT04875p, partial [Drosophila melanogaster]	AAO39658	0	77.2816	657.907	515	398	P:GO:0061640; P:GO:0016318; P:GO:0070925; P:GO:0016319; P:GO:0022604; P:GO:0031032; P:GO:0060284; P:GO:0008104; P:GO:0007015; P:GO:0048646; P:GO:0007315; C:GO:0042995; P:GO:0007424; P:GO:0051489; F:GO:0003779; P:GO:0006928; P:GO:0048675; C:GO:0044430; P:GO:0030838; C:GO:0015629; C:GO:0030017; P:GO:0050896; P:GO:2000026	P:cytoskeleton-dependent cytokinesis; P:ommatidial rotation; P:organelle assembly; P:mushroom body development; P:regulation of cell morphogenesis; P:actomyosin structure organization; P:regulation of cell development; P:protein localization; P:actin filament organization; P:anatomical structure formation involved in morphogenesis; P:pole plasm assembly; C:cell projection; P:open tracheal system …	F:GO:0003779; P:GO:0016043; F:GO:0017048; F:GO:0005488; P:GO:0030036
TRINITY_GG_2748_c1_g1_i1;TRINITY_GG_2748_c1_g1_i2	Lko057S001272	3	LOD2	AT23490p [Drosophila melanogaster]	3692	gi|19528069|gb|AAL90149.1|AT23490p [Drosophila melanogaster]	AAL90149	2.42e-83	68.1633	273.863	245	167	P:GO:0010906;C:GO:0005737;F:GO:0000309;P:GO:0045494;F:GO:0051082;C:GO:0043025;P:GO:0097062	P:regulationofglucosemetabolicprocess;C:cytoplasm;F:nicotinamide-nucleotideadenylyltransferaseactivity;P:photoreceptorcellmaintenance;F:unfoldedproteinbinding;C:neuronalcellbody;P:dendriticspinemaintenance	F:GO:0016779;F:GO:0003824;P:GO:0009435;P:GO:0009058
TRINITY_GG_2753_c0_g1_i1	Lko057S001272	3	LOD2	diuretic hormone 44 receptor 2	1180	gi|116008482|ref|NP_725175.3|diuretic hormone 44 receptor 2, isoform A [Drosophila melanogaster] gi|66773026|gb|AAY55823.1| IP10431p [Drosophila melanogaster] gi|113194644|gb|AAF58501.4| diuretic hormone 44 receptor 2, isoform A [Drosophila melanogaster]	NP_725175, AAY55823, AAF58501	1.14e-13	47.9532	73.1738	171	82	F:GO:0004930; P:GO:0007186; C:GO:0044464; P:GO:0048512; P:GO:0032501	F:G-protein coupled receptor activity; P:G-protein coupled receptor signaling pathway; C:cell part; P:circadian behavior; P:multicellular organismal process	F:GO:0004930; F:GO:0004888; P:GO:0007186; C:GO:0016021; P:GO:0007166
TRINITY_GG_2749_c0_g1_i1	Lko057S001272	3	LOD2	dynein heavy chain at 93AB	333	gi|221458016|ref|NP_524424.2|dynein heavy chain at 93AB, isoform B [Drosophila melanogaster] gi|220903155|gb|AAF55834.3| dynein heavy chain at 93AB, isoform B [Drosophila melanogaster]	NP_524424, AAF55834	1.49e-47	90	163.31	110	99	P:GO:0007605; F:GO:0005524; P:GO:0046692; C:GO:0036157; P:GO:0010996; P:GO:0019233; P:GO:0003341; F:GO:0008569; F:GO:0042623	P:sensory perception of sound; F:ATP binding; P:sperm competition; C:outer dynein arm; P:response to auditory stimulus; P:sensory perception of pain; P:cilium movement; F:ATP-dependent microtubule motor activity, minus-end-directed; F:ATPase activity, coupled	no GO terms
TRINITY_GG_2751_c1_g1_i1	Lko057S001272	3	LOD2	Suv3 helicase	2511	gi|221329989|ref|NP_649452.3|Suv3 helicase, isoform C [Drosophila melanogaster] gi|939620362|ref|NP_001303458.1| Suv3 helicase, isoform D [Drosophila melanogaster] gi|251757439|sp|Q9VN03.3|SUV3_DROME RecName: Full=ATP-dependent RNA helicase SUV3 homolog, mitochondrial; Flags: Precursor gi|220902988|gb|AAF52149.3| Suv3 helicase, isoform C [Drosophila melanogaster] gi|372466679|gb|AEX93152.1| FI178…	NP_649452, NP_001303458, Q9VN03, AAF52149, AEX93152, ALI30527	0	82.9023	1017.3	696	577	P:GO:0044528; F:GO:0003677; P:GO:0090646; F:GO:0003678; P:GO:0006119; P:GO:0097222; C:GO:0005759; P:GO:0032508; P:GO:0070131; P:GO:0022904	P:regulation of mitochondrial mRNA stability; F:DNA binding; P:mitochondrial tRNA processing; F:DNA helicase activity; P:oxidative phosphorylation; P:mitochondrial mRNA polyadenylation; C:mitochondrial matrix; P:DNA duplex unwinding; P:positive regulation of mitochondrial translation; P:respiratory electron transport chain	F:GO:0016817
TRINITY_GG_2751_c0_g1_i1	Lko057S001272	3	LOD2	uncharacterized protein Dmel_CG17068 [Drosophila melanogaster]	1627	gi|19920390|ref|NP_608379.1|uncharacterized protein Dmel_CG17068 [Drosophila melanogaster] gi|7295616|gb|AAF50925.1| uncharacterized protein Dmel_CG17068 [Drosophila melanogaster] gi|16198287|gb|AAL13977.1| LP10161p [Drosophila melanogaster]	NP_608379, AAF50925, AAL13977	1.09e-21	53.3632	100.138	223	119	P:GO:0045938; P:GO:0008150; C:GO:0005737; P:GO:0022008; P:GO:0008344; C:GO:0031463; C:GO:0005575; F:GO:0030674; P:GO:0032225; F:GO:0003674	P:positive regulation of circadian sleep/wake cycle, sleep; P:biological_process; C:cytoplasm; P:neurogenesis; P:adult locomotory behavior; C:Cul3-RING ubiquitin ligase complex; C:cellular_component; F:protein binding, bridging; P:regulation of synaptic transmission, dopaminergic; F:molecular_function	F:GO:0005515
TRINITY_GG_3949_c0_g1_i1	Lko057S001526	3	LOD2	ABC transporter expressed in trachea	350	gi|161076682|ref|NP_001097078.1|ABC transporter expressed in trachea, isoform C [Drosophila melanogaster] gi|124248390|gb|ABM92815.1| IP16822p [Drosophila melanogaster] gi|124248396|gb|ABM92818.1| IP16922p [Drosophila melanogaster] gi|157400064|gb|ABV53617.1| ABC transporter expressed in trachea, isoform C [Drosophila melanogaster]	NP_001097078, ABM92815, ABM92818, ABV53617	1.72e-21	79.7101	88.9669	69	55	F:GO:0016887; F:GO:0005524; P:GO:0055085; F:GO:0022857; C:GO:0016020; P:GO:0006909; P:GO:0006641; P:GO:0022008; P:GO:0030431	F:ATPase activity; F:ATP binding; P:transmembrane transport; F:transmembrane transporter activity; C:membrane; P:phagocytosis; P:triglyceride metabolic process; P:neurogenesis; P:sleep	no GO terms
TRINITY_GG_3944_c0_g1_i1	Lko057S001526	3	LOD2	iron regulatory protein 1B [Drosophila melanogaster]	3258	gi|8250173|emb|CAB93520.1|iron regulatory protein 1B [Drosophila melanogaster] gi|21064851|gb|AAM29655.1| SD12606p [Drosophila melanogaster]	CAB93520, AAM29655	0	74.8879	1003.43	892	668	P:GO:0007370; F:GO:0030350; P:GO:0008152; F:GO:0003994	P:ventral furrow formation; F:iron-responsive element binding; P:metabolic process; F:aconitate hydratase activity	P:GO:0008152
TRINITY_GG_3948_c0_g1_i1	Lko057S001526	3	LOD2	juvenile hormone esterase	2589	gi|161077136|ref|NP_523758.3|juvenile hormone esterase, isoform A [Drosophila melanogaster] gi|281363491|ref|NP_001163166.1| juvenile hormone esterase, isoform B [Drosophila melanogaster] gi|665401278|ref|NP_001286476.1| juvenile hormone esterase, isoform C [Drosophila melanogaster] gi|157400356|gb|AAF58061.3| juvenile hormone esterase, isoform A [Drosophila melanogaster] gi|272432508|gb|ACZ94438…	NP_523758, NP_001163166, NP_001286476, AAF58061, ACZ94438, AHN56273	8.23e-100	55.8233	323.553	498	278	F:GO:0005515; P:GO:0060179; P:GO:0006719; C:GO:0005739; P:GO:0048149; F:GO:0004453	F:protein binding; P:male mating behavior; P:juvenile hormone catabolic process; C:mitochondrion; P:behavioral response to ethanol; F:juvenile-hormone esterase activity	P:GO:0008152; F:GO:0016787
TRINITY_GG_10537_c0_g1_i1	Lko057S002659	3	LOD2	aarF domain containing kinase	4571	gi|22024280|ref|NP_611947.2|aarF domain containing kinase, isoform A [Drosophila melanogaster] gi|665403512|ref|NP_001286851.1| aarF domain containing kinase, isoform B [Drosophila melanogaster] gi|21428738|gb|AAM50029.1| SD09850p [Drosophila melanogaster] gi|21626766|gb|AAF47244.2| aarF domain containing kinase, isoform A [Drosophila melanogaster] gi|599127436|gb|AHN56646.1| aarF domain containi…	NP_611947, NP_001286851, AAM50029, AAF47244, AHN56646	0	72.4806	599.742	516	374	P:GO:0046716; P:GO:0090277; F:GO:0043167; P:GO:0008587; P:GO:0002121; P:GO:0006468; C:GO:0005875; P:GO:0040018; F:GO:0005528; P:GO:0051924; P:GO:0050908; P:GO:0008593; P:GO:0055088; P:GO:0007422; C:GO:0005783; P:GO:0022416; P:GO:0006457; P:GO:0006974; C:GO:0005743; P:GO:0007005; C:GO:0005615; F:GO:0003755; F:GO:0005515; F:GO:0070594; P:GO:0016242; P:GO:0035626; C:GO:0016027	P:muscle cell cellular homeostasis; P:positive regulation of peptide hormone secretion; F:ion binding; P:imaginal disc-derived wing margin morphogenesis; P:inter-male aggressive behavior; P:protein phosphorylation; C:microtubule associated complex; P:positive regulation of multicellular organism growth; F:FK506 binding; P:regulation of calcium ion transport; P:detection of light stimulus involved…	no GO terms
TRINITY_GG_10533_c0_g1_i1	Lko057S002659	3	LOD2	beadex	878	gi|665392256|ref|NP_001259688.2|beadex, isoform F [Drosophila melanogaster] gi|599138154|gb|AGB95530.2| beadex, isoform F [Drosophila melanogaster]	NP_001259688, AGB95530	1.19e-85	90.2778	262.307	144	130	P:GO:0007391; P:GO:0007390; P:GO:0008045; P:GO:0035483; P:GO:0036011; P:GO:0007476; P:GO:0048735; P:GO:0002121; P:GO:0045944; F:GO:0001102; P:GO:0007479; F:GO:0000980; P:GO:0007507; P:GO:0007526; P:GO:0045475; P:GO:0048542; F:GO:0003705; P:GO:0051726; P:GO:0070983; P:GO:0060033; P:GO:0008293; F:GO:0008270; P:GO:0035310; P:GO:0007362; P:GO:0006351; P:GO:0008593; P:GO:0042220; P:GO:0007521; P:GO:00…	P:dorsal closure; P:germ-band shortening; P:motor neuron axon guidance; P:gastric emptying; P:imaginal disc-derived leg segmentation; P:imaginal disc-derived wing morphogenesis; P:haltere morphogenesis; P:inter-male aggressive behavior; P:positive regulation of transcription from RNA polymerase II promoter; F:RNA polymerase II activating transcription factor binding; P:leg disc proximal/distal pa…	no GO terms
TRINITY_GG_10535_c1_g1_i1;TRINITY_GG_10535_c1_g1_i2	Lko057S002659	3	LOD2	FI09630p	1624	gi|224465267|gb|ACN43728.1|FI09630p, partial [Drosophila melanogaster]	ACN43728	3.81e-26	49.1018	110.923	334	164	C:GO:0016591	C:DNA-directedRNApolymeraseII,holoenzyme	C:GO:0016591
TRINITY_GG_10540_c0_g1_i1	Lko057S002659	3	LOD2	hinge2 [Drosophila melanogaster]	1440	gi|24645182|ref|NP_649837.1|hinge2 [Drosophila melanogaster] gi|7299094|gb|AAF54294.1| hinge2 [Drosophila melanogaster] gi|21464334|gb|AAM51970.1| LD09733p [Drosophila melanogaster]	NP_649837, AAF54294, AAM51970	8.87e-06	43.6441	48.1358	236	103	P:GO:0070828; P:GO:0035167; P:GO:0040011; P:GO:0036099; P:GO:0042078; P:GO:0008345; P:GO:0045944; C:GO:0005730; P:GO:0006325; P:GO:0007613; P:GO:0048813; C:GO:0005654; P:GO:0007611; P:GO:0050773; C:GO:0005700; F:GO:0001077; C:GO:0005705; P:GO:0045892; P:GO:0045893; P:GO:0042262; P:GO:0008355; P:GO:0007616; F:GO:0003677; C:GO:0005634; P:GO:0007416; P:GO:0030718	P:heterochromatin organization; P:larval lymph gland hemopoiesis; P:locomotion; P:female germ-line stem cell population maintenance; P:germ-line stem cell division; P:larval locomotory behavior; P:positive regulation of transcription from RNA polymerase II promoter; C:nucleolus; P:chromatin organization; P:memory; P:dendrite morphogenesis; C:nucleoplasm; P:learning or memory; P:regulation of dend…	F:GO:0003677
TRINITY_GG_10539_c0_g1_i1	Lko057S002659	3	LOD2	IP11119p [Drosophila melanogaster]	2316	gi|66772207|gb|AAY55415.1|IP11119p [Drosophila melanogaster] gi|66772303|gb|AAY55463.1| IP11019p [Drosophila melanogaster]	AAY55415, AAY55463	5.69e-08	42.1245	56.6102	273	115	P:GO:0008150; F:GO:0017171; P:GO:0007586; P:GO:0019233; F:GO:0033961; C:GO:0005575; P:GO:0009636; F:GO:0003674	P:biological_process; F:serine hydrolase activity; P:digestion; P:sensory perception of pain; F:cis-stilbene-oxide hydrolase activity; C:cellular_component; P:response to toxic substance; F:molecular_function	F:GO:0003824
TRINITY_GG_10534_c0_g1_i1	Lko057S002659	3	LOD2	kinesin-associated mitochondrial adaptor protein [Drosophila melanogaster]	4978	gi|15020262|gb|AAK74155.1|kinesin-associated mitochondrial adaptor protein [Drosophila melanogaster] gi|15020264|gb|AAK74156.1| kinesin-associated mitochondrial adaptor protein [Drosophila melanogaster]	AAK74155, AAK74156	0	60.2892	576.63	899	542	P:GO:0048311; C:GO:0005739; P:GO:0030382; F:GO:0017022; P:GO:0019233; P:GO:0007287; P:GO:0019896; P:GO:0007602	P:mitochondrion distribution; C:mitochondrion; P:sperm mitochondrion organization; F:myosin binding; P:sensory perception of pain; P:Nebenkern assembly; P:axonal transport of mitochondrion; P:phototransduction	no GO terms
TRINITY_GG_10541_c0_g1_i1	Lko057S002659	3	LOD2	lola like	1612	gi|17865642|ref|NP_524778.1|lola like, isoform A [Drosophila melanogaster] gi|24654826|ref|NP_725756.1| lola like, isoform B [Drosophila melanogaster] gi|24654830|ref|NP_725757.1| lola like, isoform C [Drosophila melanogaster] gi|24654834|ref|NP_725758.1| lola like, isoform D [Drosophila melanogaster] gi|281363640|ref|NP_001163186.1| lola like, isoform E [Drosophila melanogaster] gi|386768235|ref…	NP_524778, NP_725756, NP_725757, NP_725758, NP_001163186, NP_001246402, NP_001246403, NP_001286564, Q7KRI2, AAG45054, AAF57739, AAL25403, AAM68179, AAM68180, AAM68181, ACV53086, ACZ94458, AFH08155, AFH08156, AHN56359, ANY27501	5.41e-50	79.0323	168.703	124	98	P:GO:0035167; P:GO:0040034; F:GO:0000977; P:GO:0007455; P:GO:0042332; P:GO:0006342; P:GO:0007458; P:GO:0045944; P:GO:0048813; C:GO:0005701; P:GO:0009608; F:GO:0003700; P:GO:0006914; P:GO:0030707; P:GO:2000736; C:GO:0031519; P:GO:0061040; P:GO:0007480; P:GO:0048808; F:GO:0042803; P:GO:0006351; F:GO:0003680; P:GO:0007562; P:GO:0035072; P:GO:0071390; P:GO:0007426; P:GO:0048747; F:GO:0031208; P:GO:00…	P:larval lymph gland hemopoiesis; P:regulation of development, heterochronic; F:RNA polymerase II regulatory region sequence-specific DNA binding; P:eye-antennal disc morphogenesis; P:gravitaxis; P:chromatin silencing; P:progression of morphogenetic furrow involved in compound eye morphogenesis; P:positive regulation of transcription from RNA polymerase II promoter; P:dendrite morphogenesis; C:po…	F:GO:0005515
TRINITY_GG_12381_c0_g1_i1	Lko057S003647	3	LOD2	AF220353_1kinesin-like kinetochore motor protein CENP-meta [Drosophila melanogaster]	10799	gi|6942201|gb|AAF32355.1|AF220353_1kinesin-like kinetochore motor protein CENP-meta [Drosophila melanogaster]	AAF32355	6.55e-100	53.1532	363.229	666	354	P:GO:0007052; P:GO:0061572; P:GO:0007411; P:GO:0008103; P:GO:0008345; C:GO:0005794; C:GO:0005871; C:GO:0000776; C:GO:0045169; P:GO:0006886; P:GO:0007605; P:GO:0051289; P:GO:0007608; P:GO:0048085; P:GO:0007091; P:GO:1905515; P:GO:0007100; P:GO:0046785; C:GO:0005886; C:GO:0005912; C:GO:1990498; F:GO:0003777; P:GO:0001754; P:GO:0051298; P:GO:0030011; P:GO:0030177; P:GO:0008089; P:GO:0007030; P:GO:00…	P:mitotic spindle organization; P:actin filament bundle organization; P:axon guidance; P:oocyte microtubule cytoskeleton polarization; P:larval locomotory behavior; C:Golgi apparatus; C:kinesin complex; C:kinetochore; C:fusome; P:intracellular protein transport; P:sensory perception of sound; P:protein homotetramerization; P:sensory perception of smell; P:adult chitin-containing cuticle pigmentat…	F:GO:0005524; F:GO:0003777; P:GO:0007018; F:GO:0008017
TRINITY_GG_12378_c7_g1_i1	Lko057S003647	3	LOD2	CED8_CAEBR Cell death abnormality protein 8 OS=Caenorhabditis briggsae GN=ced-8 PE=3 SV=1	1335	gnl|BL_ORD_ID|3225sp|A8Y2U2|CED8_CAEBR Cell death abnormality protein 8 OS=Caenorhabditis briggsae GN=ced-8 PE=3 SV=1	3225	5.18e-11	43.3657	63.929	309	134			C:GO:0016021
TRINITY_GG_12378_c6_g1_i1	Lko057S003647	3	LOD2	CED8_CAEEL Cell death abnormality protein 8 OS=Caenorhabditis elegans GN=ced-8 PE=2 SV=2	2315	gnl|BL_ORD_ID|3226sp|O17386|CED8_CAEEL Cell death abnormality protein 8 OS=Caenorhabditis elegans GN=ced-8 PE=2 SV=2	3226	0.000393	52.3364	43.5134	107	56			C:GO:0016021
TRINITY_GG_12378_c1_g1_i1;TRINITY_GG_12378_c10_g1_i1;TRINITY_GG_12378_c11_g1_i1;TRINITY_GG_12378_c14_g1_i1;TRINITY_GG_12378_c18_g1_i1;TRINITY_GG_12378_c4_g1_i1;TRINITY_GG_12378_c8_g1_i1	Lko057S003647	3	LOD2	CG4554 [Drosophila melanogaster]	586	gi|24658164|ref|NP_611676.1|CG4554 [Drosophila melanogaster] gi|10727035|gb|AAF46853.2| CG4554 [Drosophila melanogaster]	NP_611676, AAF46853	1.41e-20	63.8889	89.7373	108	69	P:GO:0022008	P:neurogenesis	noGOterms;noIPSmatch;F:GO:0005488
TRINITY_GG_12380_c0_g1_i1	Lko057S003647	3	LOD2	CG6678 [Drosophila melanogaster]	1744	gi|21355837|ref|NP_650996.1|CG6678 [Drosophila melanogaster] gi|16648386|gb|AAL25458.1| LD39062p [Drosophila melanogaster] gi|23171938|gb|AAF55937.2| CG6678 [Drosophila melanogaster]	NP_650996, AAL25458, AAF55937	2.57e-28	47.1631	117.472	282	133	P:GO:0060341; F:GO:0043167; P:GO:0045886; P:GO:0048678; P:GO:0060967; P:GO:0048699; P:GO:0048522; P:GO:0006914; P:GO:0030509; C:GO:0031410; P:GO:2000331; P:GO:0032483; P:GO:0050808; P:GO:0008057; P:GO:0044765; C:GO:0005886; P:GO:0007616; P:GO:0030514; P:GO:0006727; P:GO:0010506; F:GO:0017112; F:GO:0016740; F:GO:0017137; P:GO:0050965; P:GO:0010883; P:GO:0016567	P:regulation of cellular localization; F:ion binding; P:negative regulation of synaptic growth at neuromuscular junction; P:response to axon injury; P:negative regulation of gene silencing by RNA; P:generation of neurons; P:positive regulation of cellular process; P:autophagy; P:BMP signaling pathway; C:cytoplasmic vesicle; P:regulation of terminal button organization; P:regulation of Rab protein…	no GO terms
TRINITY_GG_12378_c3_g1_i1	Lko057S003647	3	LOD2	CG8207 [Drosophila melanogaster]	1680	gi|24653912|ref|NP_611051.2|CG8207 [Drosophila melanogaster] gi|19527511|gb|AAL89870.1| RE21160p [Drosophila melanogaster] gi|21645399|gb|AAF58116.2| CG8207 [Drosophila melanogaster]	NP_611051, AAL89870, AAF58116	0	78.8506	594.349	435	343	F:GO:0016779; P:GO:0009058	F:nucleotidyltransferase activity; P:biosynthetic process	F:GO:0016779; P:GO:0009058
TRINITY_GG_12379_c2_g1_i1	Lko057S003647	3	LOD2	CG9864	1681	gi|20130167|ref|NP_611462.1|CG9864, isoform A [Drosophila melanogaster] gi|442624296|ref|NP_001261100.1| CG9864, isoform B [Drosophila melanogaster] gi|7302412|gb|AAF57499.1| CG9864, isoform A [Drosophila melanogaster] gi|72083328|gb|AAZ66322.1| LP19554p [Drosophila melanogaster] gi|440214540|gb|AGB93632.1| CG9864, isoform B [Drosophila melanogaster]	NP_611462, NP_001261100, AAF57499, AAZ66322, AGB93632	1.58e-47	46.6814	173.326	452	211	F:GO:0015114; P:GO:0006810	F:phosphate ion transmembrane transporter activity; P:transport	P:GO:0055085; C:GO:0016021
TRINITY_GG_12376_c0_g1_i1	Lko057S003647	3	LOD2	COP9 signalosome subunit 5	1185	gi|17137694|ref|NP_477442.1|COP9 signalosome subunit 5, isoform A [Drosophila melanogaster] gi|55976633|sp|Q9XZ58.1|CSN5_DROME RecName: Full=COP9 signalosome complex subunit 5; Short=Dch5; Short=Signalosome subunit 5; AltName: Full=JAB1 homolog gi|7300154|gb|AAF55321.1| COP9 signalosome subunit 5, isoform A [Drosophila melanogaster]	NP_477442, Q9XZ58, AAF55321	2.36e-11	44.6667	65.4698	150	67	P:GO:0007275; P:GO:0048477; P:GO:0006508; P:GO:0044267; C:GO:0000502; P:GO:0009653; P:GO:0048523; C:GO:0044446	P:multicellular organism development; P:oogenesis; P:proteolysis; P:cellular protein metabolic process; C:proteasome complex; P:anatomical structure morphogenesis; P:negative regulation of cellular process; C:intracellular organelle part	F:GO:0004843; P:GO:0006281; F:GO:0005515; C:GO:0070552; C:GO:0070531; P:GO:0070536
TRINITY_GG_12382_c0_g1_i1	Lko057S003647	3	LOD2	endosulfine	690	gi|24664029|ref|NP_648684.1|endosulfine, isoform A [Drosophila melanogaster] gi|24664033|ref|NP_729949.1| endosulfine, isoform B [Drosophila melanogaster] gi|386771067|ref|NP_001246745.1| endosulfine, isoform C [Drosophila melanogaster] gi|386771069|ref|NP_001246746.1| endosulfine, isoform D [Drosophila melanogaster] gi|442632227|ref|NP_001261820.1| endosulfine, isoform E [Drosophila melanogaster…	NP_648684, NP_729949, NP_001246745, NP_001246746, NP_001261820, NP_001261821, AAF49770, AAM48355, AAN11822, AFH04416, AFH04417, AGB94513, AGB94514	8.88e-18	61.0526	77.0258	95	58	F:GO:0004864; P:GO:0051445; P:GO:0043086; P:GO:0007088; P:GO:0048477; P:GO:0007067; P:GO:0007584; P:GO:0035308; P:GO:0030104	F:protein phosphatase inhibitor activity; P:regulation of meiotic cell cycle; P:negative regulation of catalytic activity; P:regulation of mitotic nuclear division; P:oogenesis; P:mitotic nuclear division; P:response to nutrient; P:negative regulation of protein dephosphorylation; P:water homeostasis	no GO terms
TRINITY_GG_12377_c0_g1_i1	Lko057S003647	3	LOD2	haspin [Drosophila melanogaster]	1933	gi|161076021|ref|NP_001015349.2|haspin [Drosophila melanogaster] gi|17366418|sp|P83103.1|HASP_DROME RecName: Full=Putative serine/threonine-protein kinase haspin homolog gi|21430158|gb|AAM50757.1| LD07633p [Drosophila melanogaster] gi|158529817|gb|EAA46104.2| haspin [Drosophila melanogaster]	NP_001015349, P83103, AAM50757, EAA46104	4e-86	62.5749	281.182	334	209	P:GO:0009987	P:cellular process	F:GO:0005524; F:GO:0004672; P:GO:0006468
TRINITY_GG_12379_c0_g1_i1	Lko057S003647	3	LOD2	heat shock protein 60A	3883	gi|24641191|ref|NP_511115.2|heat shock protein 60A, isoform A [Drosophila melanogaster] gi|24641193|ref|NP_727489.1| heat shock protein 60A, isoform B [Drosophila melanogaster] gi|12644042|sp|O02649.3|CH60_DROME RecName: Full=60 kDa heat shock protein, mitochondrial; AltName: Full=60 kDa chaperonin; AltName: Full=CPN60; AltName: Full=Heat shock protein 60; Short=HSP-60; AltName: Full=Hsp60; AltNa…	NP_511115, NP_727489, O02649, AAF47998, AAF47999, ACV04814	0	93.4545	900.968	550	514	P:GO:0007286; P:GO:0022402; P:GO:0007301; F:GO:0051082; P:GO:0000226; P:GO:0042026; P:GO:0006458; C:GO:0005743; C:GO:0005875; P:GO:0007424; C:GO:0005811; P:GO:0006626; F:GO:0005524; P:GO:0034605; C:GO:0005759; P:GO:0030707; P:GO:0006915; C:GO:0005829; P:GO:0030431	P:spermatid development; P:cell cycle process; P:female germline ring canal formation; F:unfolded protein binding; P:microtubule cytoskeleton organization; P:protein refolding; P:'de novo' protein folding; C:mitochondrial inner membrane; C:microtubule associated complex; P:open tracheal system development; C:lipid particle; P:protein targeting to mitochondrion; F:ATP binding; P:cellular response …	F:GO:0005524; C:GO:0005737; P:GO:0042026; P:GO:0006457
TRINITY_GG_12384_c0_g1_i1;TRINITY_GG_12384_c0_g1_i2	Lko057S003647	3	LOD2	hypothetical protein KGM_204059 [Danaus plexippus plexippus]	1606	gi|1209700840|gb|OWR51963.1|hypothetical protein KGM_204059 [Danaus plexippus plexippus]	OWR51963	4.32e-11	39.1304	73.559	299	117			noGOterms
TRINITY_GG_12378_c12_g1_i1	Lko057S003647	3	LOD2	hypothetical protein T10_9047 [Trichinella papuae]	687	gi|954587756|gb|KRZ65603.1|hypothetical protein T10_9047 [Trichinella papuae]	KRZ65603	3.1e-07	66.6667	55.8398	63	42			no IPS match
TRINITY_GG_12381_c1_g1_i1	Lko057S003647	3	LOD2	hypothetical protein T11_3579 [Trichinella zimbabwensis]	727	gi|954475364|gb|KRZ05510.1|hypothetical protein T11_3579 [Trichinella zimbabwensis]	KRZ05510	2.64e-35	61.1765	113.235	170	104			no IPS match
TRINITY_GG_12378_c0_g1_i1	Lko057S003647	3	LOD2	LD40776p	4132	gi|27819913|gb|AAM49937.2|LD40776p, partial [Drosophila melanogaster]	AAM49937	0	86.9942	577.015	346	301	P:GO:0007093; C:GO:0035097; P:GO:0007283; C:GO:1902562; P:GO:0007141; P:GO:1901991; C:GO:0043232; P:GO:0045886; C:GO:0005643; P:GO:0006406; F:GO:0005515; P:GO:0051297; P:GO:0010506; P:GO:0016570; P:GO:2000045; C:GO:0036126; C:GO:0016006; P:GO:0018205	P:mitotic cell cycle checkpoint; C:histone methyltransferase complex; P:spermatogenesis; C:H4 histone acetyltransferase complex; P:male meiosis I; P:negative regulation of mitotic cell cycle phase transition; C:intracellular non-membrane-bounded organelle; P:negative regulation of synaptic growth at neuromuscular junction; C:nuclear pore; P:mRNA export from nucleus; F:protein binding; P:centrosom…	F:GO:0005515
TRINITY_GG_12375_c0_g1_i1	Lko057S003647	3	LOD2	mitochondrial ribosomal protein L20 [Drosophila melanogaster]	820	gi|17647671|ref|NP_524051.1|mitochondrial ribosomal protein L20 [Drosophila melanogaster] gi|7294513|gb|AAF49855.1| mitochondrial ribosomal protein L20 [Drosophila melanogaster] gi|255004816|gb|ACT98667.1| LP04985p [Drosophila melanogaster]	NP_524051, AAF49855, ACT98667	2.65e-54	77.4436	173.711	133	103	F:GO:0003735; P:GO:0032543; C:GO:0005762	F:structural constituent of ribosome; P:mitochondrial translation; C:mitochondrial large ribosomal subunit	F:GO:0003735; F:GO:0019843; C:GO:0005840; C:GO:0005622; P:GO:0006412
TRINITY_GG_12378_c5_g1_i1	Lko057S003647	3	LOD2	MOS1T_DROMA Mariner Mos1 transposase OS=Drosophila mauritiana GN=mariner\T PE=1 SV=1	1010	gnl|BL_ORD_ID|13522sp|Q7JQ07|MOS1T_DROMA Mariner Mos1 transposase OS=Drosophila mauritiana GN=mariner\T PE=1 SV=1	13522	4.24e-46	44.4444	159.844	333	148	P:GO:0060919	P:auxin influx	no GO terms
TRINITY_GG_12381_c3_g1_i1	Lko057S003647	3	LOD2	PREDICTED: uncharacterized protein LOC108370842 [Rhagoletis zephyria]	413	gi|1048055265|ref|XP_017481746.1|PREDICTED: uncharacterized protein LOC108370842 [Rhagoletis zephyria] gi|1048055267|ref|XP_017481747.1| PREDICTED: uncharacterized protein LOC108370842 [Rhagoletis zephyria]	XP_017481746, XP_017481747	4.25e-21	63.3028	95.5153	109	69			no IPS match
TRINITY_GG_12374_c0_g1_i1	Lko057S003647	3	LOD2	Rab18 [Drosophila melanogaster]	1394	gi|24639915|ref|NP_524744.2|Rab18 [Drosophila melanogaster] gi|7290608|gb|AAF46057.1| Rab18 [Drosophila melanogaster] gi|18447210|gb|AAL68196.1| GH11193p [Drosophila melanogaster]	NP_524744, AAF46057, AAL68196	2.74e-58	75.6098	191.43	164	124	C:GO:0008021; P:GO:0007295; P:GO:0007015; P:GO:0008103; P:GO:0045886; P:GO:0007298; C:GO:0043025; C:GO:0045169; P:GO:0007299; P:GO:0030866; P:GO:0051642; C:GO:0043195; C:GO:0045178; F:GO:0003924; P:GO:0045175; F:GO:0032403; C:GO:0030140; P:GO:0032482; P:GO:0046664; P:GO:1990182; P:GO:0090383; P:GO:0007349; P:GO:0042742; C:GO:0005886; C:GO:0005635; P:GO:0048210; P:GO:0006888; P:GO:0048137; P:GO:00…	C:synaptic vesicle; P:growth of a germarium-derived egg chamber; P:actin filament organization; P:oocyte microtubule cytoskeleton polarization; P:negative regulation of synaptic growth at neuromuscular junction; P:border follicle cell migration; C:neuronal cell body; C:fusome; P:ovarian follicle cell-cell adhesion; P:cortical actin cytoskeleton organization; P:centrosome localization; C:terminal …	F:GO:0005525; F:GO:0003924
TRINITY_GG_12379_c3_g1_i1	Lko057S003647	3	LOD2	Sex combs extra [Drosophila melanogaster]	2210	gi|17137804|ref|NP_477509.1|Sex combs extra [Drosophila melanogaster] gi|50401702|sp|Q9VB08.1|RING1_DROME RecName: Full=E3 ubiquitin-protein ligase RING1; AltName: Full=RING-type E3 ubiquitin transferase RING1; AltName: Full=Sex comb extra protein; AltName: Full=dRING protein; AltName: Full=dRING1 gi|7301619|gb|AAF56737.1| Sex combs extra [Drosophila melanogaster] gi|16197987|gb|AAL13764.1| LD239…	NP_477509, Q9VB08, AAF56737, AAL13764	1.96e-84	93.1973	275.018	147	137	P:GO:0007062; F:GO:0008270; C:GO:0035102; P:GO:0030708; C:GO:0008278; P:GO:0022008; P:GO:0045498; P:GO:0006342; C:GO:0005730; F:GO:0004842; P:GO:0007419; F:GO:0005515; P:GO:0030713; P:GO:0035518	P:sister chromatid cohesion; F:zinc ion binding; C:PRC1 complex; P:germarium-derived female germ-line cyst encapsulation; C:cohesin complex; P:neurogenesis; P:sex comb development; P:chromatin silencing; C:nucleolus; F:ubiquitin-protein transferase activity; P:ventral cord development; F:protein binding; P:ovarian follicle cell stalk formation; P:histone H2A monoubiquitination	no GO terms
TRINITY_GG_12378_c16_g1_i1	Lko057S003647	3	LOD2	Small subunit processome component 20-like protein [Zootermopsis nevadensis]	570	gi|646715776|gb|KDR19264.1|Small subunit processome component 20-like protein [Zootermopsis nevadensis]	KDR19264	9.18e-15	50	79.7221	178	89	C:GO:0032040; P:GO:0000462; C:GO:0005730; C:GO:0030686	C:small-subunit processome; P:maturation of SSU-rRNA from tricistronic rRNA transcript (SSU-rRNA, 5.8S rRNA, LSU-rRNA); C:nucleolus; C:90S preribosome	no IPS match
TRINITY_GG_12379_c1_g1_i1	Lko057S003647	3	LOD2	uncharacterized protein Dmel_CG11267 [Drosophila melanogaster]	949	gi|21356029|ref|NP_648622.1|uncharacterized protein Dmel_CG11267 [Drosophila melanogaster] gi|7294514|gb|AAF49856.1| uncharacterized protein Dmel_CG11267 [Drosophila melanogaster] gi|17944559|gb|AAL48167.1| RH34413p [Drosophila melanogaster]	NP_648622, AAF49856, AAL48167	1.32e-38	83.5052	132.88	97	81	C:GO:0005811; C:GO:0005759; P:GO:0006458	C:lipid particle; C:mitochondrial matrix; P:'de novo' protein folding	F:GO:0005524; C:GO:0005737; P:GO:0006457
TRINITY_GG_13643_c3_g1_i1	Lko057S004513	3	LOD2	Autophagy-related 9	3355	gi|20130047|ref|NP_611114.1|Autophagy-related 9, isoform A [Drosophila melanogaster] gi|7302947|gb|AAF58018.1| Autophagy-related 9, isoform A [Drosophila melanogaster] gi|29468962|gb|AAO85562.1| RE14003p [Drosophila melanogaster]	NP_611114, AAF58018, AAO85562	0	63.26	645.966	773	489	P:GO:0010508; C:GO:0005737; P:GO:0035096; P:GO:0046330; C:GO:0030054; P:GO:0034599; P:GO:0009267; P:GO:0061723	P:positive regulation of autophagy; C:cytoplasm; P:larval midgut cell programmed cell death; P:positive regulation of JNK cascade; C:cell junction; P:cellular response to oxidative stress; P:cellular response to starvation; P:glycophagy	no GO terms
TRINITY_GG_13645_c0_g1_i1	Lko057S004513	3	LOD2	Cdc42	3052	gi|17647249|ref|NP_523414.1|Cdc42, isoform A [Drosophila melanogaster] gi|386764751|ref|NP_001245762.1| Cdc42, isoform C [Drosophila melanogaster] gi|386764753|ref|NP_001245763.1| Cdc42, isoform D [Drosophila melanogaster] gi|729077|sp|P40793.1|CDC42_DROME RecName: Full=Cdc42 homolog; Flags: Precursor gi|520533|gb|AAA62871.1| Dcdc42 [Drosophila melanogaster] gi|5457111|gb|AAD43787.1| CDC42 protei…	NP_523414, NP_001245762, NP_001245763, P40793, AAA62871, AAD43787, AAD43789, AAD43791, AAF49007, AAM50224, AFH07474, AFH07475	1.11e-124	97.3822	378.252	191	186	P:GO:0007370; P:GO:0035320; P:GO:0007374; P:GO:1904059; P:GO:0008582; P:GO:0022409; P:GO:0007377; P:GO:0007498; P:GO:0051491; P:GO:0007254; P:GO:0007017; P:GO:0007413; P:GO:0008347; C:GO:0030426; P:GO:1901739; P:GO:0002118; P:GO:0035318; P:GO:0071896; P:GO:0035159; C:GO:0030424; F:GO:0019901; P:GO:0035277; P:GO:0008078; P:GO:0007422; P:GO:0045773; P:GO:0007266; P:GO:0008354; P:GO:0006974; P:GO:00…	P:ventral furrow formation; P:imaginal disc-derived wing hair site selection; P:posterior midgut invagination; P:regulation of locomotor rhythm; P:regulation of synaptic growth at neuromuscular junction; P:positive regulation of cell-cell adhesion; P:germ-band extension; P:mesoderm development; P:positive regulation of filopodium assembly; P:JNK cascade; P:microtubule-based process; P:axonal fasc…	F:GO:0005525; P:GO:0007264; F:GO:0003924; C:GO:0005622
TRINITY_GG_13646_c1_g1_i1;TRINITY_GG_9991_c1_g1_i1	Lko057S004513	3	LOD2	CG1316 [Drosophila melanogaster]	3119	gi|24657454|ref|NP_647887.1|CG1316 [Drosophila melanogaster] gi|23092993|gb|AAF47879.2| CG1316 [Drosophila melanogaster] gi|25012783|gb|AAN71483.1| RE70333p [Drosophila melanogaster]	NP_647887, AAF47879, AAN71483	3.17e-106	54.7389	340.887	517	283	C:GO:0044428;P:GO:0045727;P:GO:0036099;F:GO:0043565;C:GO:0005703;P:GO:0010906;C:GO:0030529;F:GO:0048027;P:GO:0000381;P:GO:0001745;P:GO:0048477;P:GO:0019233;P:GO:0033119;F:GO:0008083;P:GO:0007131;P:GO:0046579;P:GO:0009994;F:GO:0008266;C:GO:0005654;F:GO:0003730;F:GO:0000166;P:GO:0007548;P:GO:0007549;C:GO:0071013;C:GO:0071011;P:GO:0000380;P:GO:0048025;P:GO:0019101;P:GO:0017148;F:GO:0000900;P:GO:0007…	C:nuclearpart;P:positiveregulationoftranslation;P:femalegerm-linestemcellpopulationmaintenance;F:sequence-specificDNAbinding;C:polytenechromosomepuff;P:regulationofglucosemetabolicprocess;C:intracellularribonucleoproteincomplex;F:mRNA5'-UTRbinding;P:regulationofalternativemRNAsplicing,viaspliceosome;P:compoundeyemorphogenesis;P:oogenesis;P:sensoryperceptionofpain;P:negativeregulationofRNAsplicing…	F:GO:0003676;noIPSmatch
TRINITY_GG_13642_c0_g1_i1	Lko057S004513	3	LOD2	IGF-II mRNA-binding protein	9758	gi|386764191|ref|NP_001245616.1|IGF-II mRNA-binding protein, isoform L [Drosophila melanogaster] gi|665390621|ref|NP_001285091.1| IGF-II mRNA-binding protein, isoform M [Drosophila melanogaster] gi|383293324|gb|AFH07330.1| IGF-II mRNA-binding protein, isoform L [Drosophila melanogaster] gi|599137787|gb|AHN59561.1| IGF-II mRNA-binding protein, isoform M [Drosophila melanogaster]	NP_001245616, NP_001285091, AFH07330, AHN59561	0	77.821	653.284	514	400	P:GO:0007283; P:GO:0042594; C:GO:0043025; F:GO:0003730; P:GO:0000398; F:GO:0000166; P:GO:0005975; P:GO:0048680; P:GO:0051124; C:GO:0071013; C:GO:0005737; C:GO:0071011; P:GO:0016322; C:GO:0030424	P:spermatogenesis; P:response to starvation; C:neuronal cell body; F:mRNA 3'-UTR binding; P:mRNA splicing, via spliceosome; F:nucleotide binding; P:carbohydrate metabolic process; P:positive regulation of axon regeneration; P:synaptic growth at neuromuscular junction; C:catalytic step 2 spliceosome; C:cytoplasm; C:precatalytic spliceosome; P:neuron remodeling; C:axon	F:GO:0003676; F:GO:0003723
TRINITY_GG_13643_c2_g1_i1	Lko057S004513	3	LOD2	NADH dehydrogenase (ubiquinone) 42 kDa subunit	3312	gi|17933656|ref|NP_524445.1|NADH dehydrogenase (ubiquinone) 42 kDa subunit, isoform A [Drosophila melanogaster] gi|24648886|ref|NP_732692.1| NADH dehydrogenase (ubiquinone) 42 kDa subunit, isoform B [Drosophila melanogaster] gi|442620385|ref|NP_001262821.1| NADH dehydrogenase (ubiquinone) 42 kDa subunit, isoform C [Drosophila melanogaster] gi|12644364|sp|P91929.2|NDUAA_DROME RecName: Full=NADH de…	NP_524445, NP_732692, NP_001262821, P91929, AAF55947, AAK93188, AAN13899, AGB96201	1.11e-118	68.4478	372.859	393	269	C:GO:0005811; F:GO:0003954; P:GO:0010906; C:GO:0005739	C:lipid particle; F:NADH dehydrogenase activity; P:regulation of glucose metabolic process; C:mitochondrion	C:GO:0005747; P:GO:0006120
TRINITY_GG_13643_c0_g1_i1	Lko057S004513	3	LOD2	nucleostemin 3	2501	gi|18543229|ref|NP_569915.1|nucleostemin 3, isoform A [Drosophila melanogaster] gi|665389120|ref|NP_001284779.1| nucleostemin 3, isoform B [Drosophila melanogaster] gi|74949081|sp|Q9W590.1|LSG1_DROME RecName: Full=Large subunit GTPase 1 homolog; AltName: Full=Nucleostemin-3 gi|4481810|emb|CAB38462.1| EG:BACN32G11.5 [Drosophila melanogaster] gi|7290165|gb|AAF45628.1| nucleostemin 3, isoform A [Dro…	NP_569915, NP_001284779, Q9W590, CAB38462, AAF45628, AAK77288, AHN59250	0	67.3252	630.558	658	443	P:GO:0000054; C:GO:0005737; F:GO:0003924; P:GO:0009267; C:GO:0005730; P:GO:0044699; P:GO:0040018; C:GO:0005654	P:ribosomal subunit export from nucleus; C:cytoplasm; F:GTPase activity; P:cellular response to starvation; C:nucleolus; P:single-organism process; P:positive regulation of multicellular organism growth; C:nucleoplasm	F:GO:0005525
TRINITY_GG_14499_c3_g1_i1	Lko057S005289	3	LOD2	ankyrin 2	571	gi|442630835|ref|NP_001261537.1|ankyrin 2, isoform X [Drosophila melanogaster] gi|440215442|gb|AGB94232.1| ankyrin 2, isoform X [Drosophila melanogaster]	NP_001261537, AGB94232	8.81e-25	56.1151	101.293	139	78	P:GO:0007528; P:GO:0007605; P:GO:0007614; P:GO:0070050; P:GO:1900074; C:GO:0043195; P:GO:0048675; P:GO:0019233; C:GO:0031594; C:GO:0036062; P:GO:0000226; P:GO:0045887	P:neuromuscular junction development; P:sensory perception of sound; P:short-term memory; P:neuron cellular homeostasis; P:negative regulation of neuromuscular synaptic transmission; C:terminal bouton; P:axon extension; P:sensory perception of pain; C:neuromuscular junction; C:presynaptic periactive zone; P:microtubule cytoskeleton organization; P:positive regulation of synaptic growth at neuromu…	F:GO:0005515
TRINITY_GG_14508_c0_g1_i1	Lko057S005289	3	LOD2	CG3107	3673	gi|24585803|ref|NP_610156.1|CG3107, isoform A [Drosophila melanogaster] gi|24585805|ref|NP_724396.1| CG3107, isoform B [Drosophila melanogaster] gi|116007548|ref|NP_001036470.1| CG3107, isoform C [Drosophila melanogaster] gi|665399233|ref|NP_001286139.1| CG3107, isoform D [Drosophila melanogaster] gi|74947602|sp|Q9V9E3.2|PREP_DROME RecName: Full=Presequence protease, mitochondrial; Flags: Precurs…	NP_610156, NP_724396, NP_001036470, NP_001286139, Q9V9E3, AAM27510, AAF57348, AAM68370, ABI31021, AHN55937	0	60.0406	762.296	986	592	C:GO:0005759; F:GO:0046872; P:GO:0006508; F:GO:0004222	C:mitochondrial matrix; F:metal ion binding; P:proteolysis; F:metalloendopeptidase activity	F:GO:0003824; F:GO:0046872; P:GO:0006508; F:GO:0004222
TRINITY_GG_14502_c0_g1_i1;TRINITY_GG_14502_c0_g1_i2	Lko057S005289	3	LOD2	CG6931 [Drosophila melanogaster]	1191	gi|21357553|ref|NP_648536.1|CG6931 [Drosophila melanogaster] gi|7294637|gb|AAF49975.1| CG6931 [Drosophila melanogaster] gi|17861742|gb|AAL39348.1| GH25848p [Drosophila melanogaster]	NP_648536, AAF49975, AAL39348	1.15e-28	47.479	114.39	238	113			noGOterms
TRINITY_GG_14505_c2_g1_i1	Lko057S005289	3	LOD2	CG6978 [Drosophila melanogaster]	619	gi|24639764|ref|NP_572188.1|CG6978 [Drosophila melanogaster] gi|7290534|gb|AAF45986.1| CG6978 [Drosophila melanogaster]	NP_572188, AAF45986	1.24e-14	44.6602	72.4034	206	92	F:GO:0015114; P:GO:0006810	F:phosphate ion transmembrane transporter activity; P:transport	P:GO:0055085; C:GO:0016021
TRINITY_GG_14505_c0_g1_i1	Lko057S005289	3	LOD2	GH28013p [Drosophila melanogaster]	1358	gi|16768280|gb|AAL28359.1|GH28013p [Drosophila melanogaster]	AAL28359	2.55e-16	51.8519	79.337	135	70	C:GO:0016020; C:GO:0044464	C:membrane; C:cell part	no GO terms
TRINITY_GG_14503_c0_g1_i1;TRINITY_GG_14503_c2_g1_i1;TRINITY_GG_14505_c1_g1_i1;TRINITY_GG_14507_c0_g1_i1;TRINITY_GG_14507_c1_g1_i1;TRINITY_GG_14509_c0_g1_i1;TRINITY_GG_14511_c0_g1_i1;TRINITY_GG_14511_c0_g1_i2	Lko057S005289	3	LOD2	major facilitator superfamily transporter 3 [Drosophila melanogaster]	2309	gi|24580790|ref|NP_608572.1|major facilitator superfamily transporter 3 [Drosophila melanogaster] gi|7296119|gb|AAF51413.1| major facilitator superfamily transporter 3 [Drosophila melanogaster] gi|20152061|gb|AAM11390.1| RE01809p [Drosophila melanogaster]	NP_608572, AAF51413, AAM11390	1.46e-53	54.023	194.512	348	188	F:GO:0015114;P:GO:0006810;C:GO:0005886;C:GO:0016020;F:GO:0015294;C:GO:0044464;F:GO:0015081;P:GO:0006820;P:GO:0055085;C:GO:0016021;C:GO:0005829;P:GO:0035435;F:GO:0005436;P:GO:0006817;P:GO:0044699;P:GO:0009987	F:phosphateiontransmembranetransporteractivity;P:transport;C:plasmamembrane;C:membrane;F:solute:cationsymporteractivity;C:cellpart;F:sodiumiontransmembranetransporteractivity;P:aniontransport;P:transmembranetransport;C:integralcomponentofmembrane;C:cytosol;P:phosphateiontransmembranetransport;F:sodium:phosphatesymporteractivity;P:phosphateiontransport;P:single-organismprocess;P:cellularprocess	P:GO:0055085;C:GO:0016021;noGOterms
TRINITY_GG_14501_c0_g1_i1	Lko057S005289	3	LOD2	RE46223p [Drosophila melanogaster]	1731	gi|255522994|gb|ACU12389.1|RE46223p [Drosophila melanogaster]	ACU12389	8.35e-180	90.0685	511.531	292	263	C:GO:0005634; F:GO:0005515; P:GO:0007274; C:GO:0005938; C:GO:0045495; P:GO:0045732; P:GO:0045886; P:GO:0046843; C:GO:0019005; C:GO:0031466; P:GO:0035556; P:GO:0007314	C:nucleus; F:protein binding; P:neuromuscular synaptic transmission; C:cell cortex; C:pole plasm; P:positive regulation of protein catabolic process; P:negative regulation of synaptic growth at neuromuscular junction; P:dorsal appendage formation; C:SCF ubiquitin ligase complex; C:Cul5-RING ubiquitin ligase complex; P:intracellular signal transduction; P:oocyte anterior/posterior axis specificati…	F:GO:0005515; P:GO:0035556
TRINITY_GG_14506_c0_g1_i1;TRINITY_GG_14506_c5_g1_i1	Lko057S005289	3	LOD2	uncharacterized protein Dmel_CG17687 [Drosophila melanogaster]	840	gi|24663730|ref|NP_648634.1|uncharacterized protein Dmel_CG17687 [Drosophila melanogaster] gi|7294490|gb|AAF49833.1| uncharacterized protein Dmel_CG17687 [Drosophila melanogaster]	NP_648634, AAF49833	2.32e-31	49.8208	124.02	279	139			noIPSmatch
TRINITY_GG_4396_c0_g1_i1;TRINITY_GG_4396_c0_g1_i2;TRINITY_GG_4396_c0_g1_i3	Lko057S001602	3	peak	chitin deacetylase-like 5	408	gi|386768832|ref|NP_001245805.1|chitin deacetylase-like 5, isoform F [Drosophila melanogaster] gi|383291239|gb|AFH03482.1| chitin deacetylase-like 5, isoform F [Drosophila melanogaster]	NP_001245805, AFH03482	3.42e-05	60.4651	43.1282	43	26	F:GO:0004568;F:GO:0016810;P:GO:0005975;F:GO:0008061;P:GO:0006032;P:GO:0006030;C:GO:0005576	F:chitinaseactivity;F:hydrolaseactivity,actingoncarbon-nitrogen(butnotpeptide)bonds;P:carbohydratemetabolicprocess;F:chitinbinding;P:chitincatabolicprocess;P:chitinmetabolicprocess;C:extracellularregion	F:GO:0008061;P:GO:0006030;C:GO:0005576;noIPSmatch
TRINITY_GG_4399_c0_g1_i1	Lko057S001602	3	peak	cuticular protein 30F [Drosophila melanogaster]	831	gi|24583177|ref|NP_723504.1|cuticular protein 30F [Drosophila melanogaster] gi|22946069|gb|AAN10713.1| cuticular protein 30F [Drosophila melanogaster] gi|294489360|gb|ACY00711.3| RT03505p, partial [Drosophila melanogaster] gi|1049300683|gb|ANY27285.1| GEO02645p1, partial [Drosophila melanogaster]	NP_723504, AAN10713, ACY00711, ANY27285	6.62e-18	76.6667	79.337	60	46	C:GO:0005811; P:GO:0040003; F:GO:0005509; F:GO:0008010; P:GO:0048058; P:GO:0019233; P:GO:0022008; C:GO:0031012; P:GO:0007601; F:GO:0005212	C:lipid particle; P:chitin-based cuticle development; F:calcium ion binding; F:structural constituent of chitin-based larval cuticle; P:compound eye corneal lens development; P:sensory perception of pain; P:neurogenesis; C:extracellular matrix; P:visual perception; F:structural constituent of eye lens	no IPS match
TRINITY_GG_8791_c0_g1_i1;TRINITY_GG_9890_c1_g1_i1	Lko057S001921	3	peak	tenzing norgay	253	gi|24667711|ref|NP_730569.1|tenzing norgay, isoform B [Drosophila melanogaster] gi|10726919|gb|AAG22178.1| tenzing norgay, isoform B [Drosophila melanogaster]	NP_730569, AAG22178	8.78e-07	67.4419	45.4394	43	29	P:GO:0001666;P:GO:0019233;P:GO:0044763;P:GO:0044237;P:GO:0071704;C:GO:0005875	P:responsetohypoxia;P:sensoryperceptionofpain;P:single-organismcellularprocess;P:cellularmetabolicprocess;P:organicsubstancemetabolicprocess;C:microtubuleassociatedcomplex	F:GO:0004416;P:GO:0019243;noGOterms
TRINITY_GG_8790_c0_g1_i1	Lko057S001921	3	peak	uncharacterized protein Dmel_CG31145	1083	gi|221458705|ref|NP_001138101.1|uncharacterized protein Dmel_CG31145, isoform C [Drosophila melanogaster] gi|902951559|sp|A4VCL2.1|FA20C_DROME RecName: Full=Extracellular serine/threonine protein CG31145; AltName: Full=Golgi casein kinase; AltName: Full=Golgi-enriched fraction casein kinase; Short=GEF-CK gi|145587060|gb|ABP87895.1| IP18281p [Drosophila melanogaster] gi|220903183|gb|ACL83557.1| un…	NP_001138101, A4VCL2, ABP87895, ACL83557	1.51e-09	67.3077	60.4622	104	70	P:GO:0007476; C:GO:0005794; F:GO:0004672; C:GO:0005576; P:GO:0006468	P:imaginal disc-derived wing morphogenesis; C:Golgi apparatus; F:protein kinase activity; C:extracellular region; P:protein phosphorylation	no GO terms
TRINITY_GG_7960_c0_g1_i1	Lko057S000591	4	flanking	5-hydroxytryptamine (serotonin) receptor 7	1565	gi|17864132|ref|NP_524599.1|5-hydroxytryptamine (serotonin) receptor 7, isoform A [Drosophila melanogaster] gi|442621999|ref|NP_001263131.1| 5-hydroxytryptamine (serotonin) receptor 7, isoform B [Drosophila melanogaster] gi|112805|sp|P20905.1|5HT1R_DROME RecName: Full=5-hydroxytryptamine receptor 1; Short=5-HT receptor; AltName: Full=5HT-dro; AltName: Full=Serotonin receptor 1 gi|156725|gb|AAA283…	NP_524599, NP_001263131, P20905, AAA28305, AAF57104, AAM49860, AGB96510	7.45e-07	45.1754	52.7582	228	103	F:GO:0004930; P:GO:0008049	F:G-protein coupled receptor activity; P:male courtship behavior	F:GO:0004930; P:GO:0007186; C:GO:0016021
TRINITY_GG_7959_c1_g1_i1	Lko057S000591	4	flanking	adenosine receptor	702	gi|442621849|ref|NP_001263101.1|adenosine receptor, isoform B [Drosophila melanogaster] gi|440218056|gb|AGB96480.1| adenosine receptor, isoform B [Drosophila melanogaster]	NP_001263101, AGB96480	1.9e-05	52.1127	46.2098	142	74	F:GO:0035100; P:GO:0046959; P:GO:0090279; P:GO:0042594; P:GO:0008049; F:GO:0016907; P:GO:0007213; P:GO:0022008; P:GO:0007211; P:GO:0008306; P:GO:0007612; F:GO:0008227; C:GO:0005887; P:GO:0045471; F:GO:0001588; P:GO:0051482; P:GO:0030728; P:GO:0010579; F:GO:0001609; P:GO:0060278; P:GO:0007186; P:GO:0035075; P:GO:0030819; P:GO:0007268; P:GO:0007188; P:GO:0009267; P:GO:0043410; P:GO:0090281; P:GO:00…	F:ecdysone binding; P:habituation; P:regulation of calcium ion import; P:response to starvation; P:male courtship behavior; F:G-protein coupled acetylcholine receptor activity; P:G-protein coupled acetylcholine receptor signaling pathway; P:neurogenesis; P:octopamine or tyramine signaling pathway; P:associative learning; P:learning; F:G-protein coupled amine receptor activity; C:integral componen…	F:GO:0004930; P:GO:0007186; C:GO:0016021
TRINITY_GG_7961_c0_g1_i1	Lko057S000591	4	flanking	CG5435	744	gi|24583904|ref|NP_609567.2|CG5435, isoform A [Drosophila melanogaster] gi|665407779|ref|NP_001285873.1| CG5435, isoform B [Drosophila melanogaster] gi|21429730|gb|AAM50543.1| AT11334p [Drosophila melanogaster] gi|22946335|gb|AAF53190.2| CG5435, isoform A [Drosophila melanogaster] gi|599125340|gb|AHN54387.1| CG5435, isoform B [Drosophila melanogaster]	NP_609567, NP_001285873, AAM50543, AAF53190, AHN54387	7.06e-07	44.7552	49.2914	143	64			no GO terms
TRINITY_GG_7959_c0_g1_i1	Lko057S000591	4	flanking	octopamine beta1 receptor	402	gi|24649037|ref|NP_651057.1|octopamine beta1 receptor, isoform A [Drosophila melanogaster] gi|442620487|ref|NP_001262843.1| octopamine beta1 receptor, isoform E [Drosophila melanogaster] gi|75026733|sp|Q9VCZ3.1|OCTB1_DROME RecName: Full=Octopamine receptor beta-1R; Short=DmOA2; Short=DmOct-beta-1R gi|7300871|gb|AAF56012.1| octopamine beta1 receptor, isoform A [Drosophila melanogaster] gi|56561270…	NP_651057, NP_001262843, Q9VCZ3, AAF56012, CAE84925, CAI56428, AGB96223	2.28e-05	53.9474	43.5134	76	41	P:GO:0007186; P:GO:0007377; P:GO:0045886; P:GO:0006355; P:GO:0009566; P:GO:0007210; P:GO:0007188; F:GO:0043565; F:GO:0004993; P:GO:0045887; F:GO:0008227; C:GO:0005886; F:GO:0001587; C:GO:0005887; F:GO:0003700; F:GO:0004935; F:GO:0004989; P:GO:0051482; P:GO:0030728; C:GO:0016021; P:GO:0010579; P:GO:2000253	P:G-protein coupled receptor signaling pathway; P:germ-band extension; P:negative regulation of synaptic growth at neuromuscular junction; P:regulation of transcription, DNA-templated; P:fertilization; P:serotonin receptor signaling pathway; P:adenylate cyclase-modulating G-protein coupled receptor signaling pathway; F:sequence-specific DNA binding; F:G-protein coupled serotonin receptor activity…	F:GO:0004930; P:GO:0007186; C:GO:0016021
TRINITY_GG_7962_c0_g1_i1	Lko057S000591	4	flanking	RE11711p [Drosophila melanogaster]	204	gi|21392088|gb|AAM48398.1|RE11711p [Drosophila melanogaster]	AAM48398	1.05e-05	59.6774	41.9726	62	37	C:GO:0016592; F:GO:0001104; P:GO:0006367	C:mediator complex; F:RNA polymerase II transcription cofactor activity; P:transcription initiation from RNA polymerase II promoter	no IPS match
TRINITY_GG_7965_c0_g1_i1;TRINITY_GG_7965_c2_g1_i1;TRINITY_GG_7965_c4_g1_i1	Lko057S000591	4	flanking	RE48314p [Drosophila melanogaster]	433	gi|41058078|gb|AAR99103.1|RE48314p [Drosophila melanogaster]	AAR99103	1.32e-35	65.7343	130.568	143	94	P:GO:0007297;F:GO:0005030;C:GO:0009897;F:GO:0043167;P:GO:0007498;P:GO:0007411;P:GO:0007155;P:GO:0060026;P:GO:0060049;P:GO:0048935;P:GO:0002752;P:GO:0003401;P:GO:0007507;P:GO:0030703;P:GO:0010632;P:GO:0051607;C:GO:0031012;P:GO:0070983;P:GO:0008078;P:GO:0035295;P:GO:0009887;F:GO:0046790;P:GO:0007419;P:GO:0010508;F:GO:0004888;F:GO:0005515;F:GO:0008329;P:GO:0002227;P:GO:0010906;C:GO:0005737;P:GO:0048…	P:ovarianfolliclecellmigration;F:neurotrophinreceptoractivity;C:externalsideofplasmamembrane;F:ionbinding;P:mesodermdevelopment;P:axonguidance;P:celladhesion;P:convergentextension;P:regulationofproteinglycosylation;P:peripheralnervoussystemneurondevelopment;P:cellsurfacepatternrecognitionreceptorsignalingpathway;P:axiselongation;P:heartdevelopment;P:eggshellformation;P:regulationofepithelialcellm…	F:GO:0005515;noGOterms
TRINITY_GG_7964_c1_g1_i1;TRINITY_GG_7964_c1_g1_i2	Lko057S000591	4	flanking	Rfx	4893	gi|442618464|ref|NP_001097738.2|Rfx, isoform I [Drosophila melanogaster] gi|440217304|gb|ABW08636.2| Rfx, isoform I [Drosophila melanogaster]	NP_001097738, ABW08636	0	76.4	633.639	500	382	P:GO:0007605;P:GO:0010906;P:GO:0006355;F:GO:0043565;P:GO:0048813	P:sensoryperceptionofsound;P:regulationofglucosemetabolicprocess;P:regulationoftranscription,DNA-templated;F:sequence-specificDNAbinding;P:dendritemorphogenesis	F:GO:0003677;P:GO:0006355
TRINITY_GG_7968_c0_g1_i1	Lko057S000591	4	flanking	suppressor of variegation 2-10	1120	gi|24652000|ref|NP_724756.1|suppressor of variegation 2-10, isoform E [Drosophila melanogaster] gi|4761233|gb|AAD29288.1|AF114486_2 Zimp-B [Drosophila melanogaster] gi|16198051|gb|AAL13812.1| LD27861p [Drosophila melanogaster] gi|21627623|gb|AAM68809.1| suppressor of variegation 2-10, isoform E [Drosophila melanogaster]	NP_724756, AAD29288, AAL13812, AAM68809	1.46e-32	50.3546	128.642	282	142	C:GO:0005700; P:GO:0048583; C:GO:0000790; P:GO:0048513; P:GO:0044763; P:GO:0048523; P:GO:0006974; P:GO:0048096	C:polytene chromosome; P:regulation of response to stimulus; C:nuclear chromatin; P:animal organ development; P:single-organism cellular process; P:negative regulation of cellular process; P:cellular response to DNA damage stimulus; P:chromatin-mediated maintenance of transcription	F:GO:0008270
TRINITY_GG_7965_c1_g1_i1	Lko057S000591	4	flanking	tollo [Drosophila melanogaster]	276	gi|24664561|ref|NP_524757.1|tollo [Drosophila melanogaster] gi|74867119|sp|Q9V477.1|TOLL8_DROME RecName: Full=Toll-like receptor Tollo; AltName: Full=Toll-like receptor 8; Flags: Precursor gi|6601447|gb|AAF18983.1|AF204158_1 cell surface receptor TOLLO [Drosophila melanogaster] gi|9246961|gb|AAF86224.1|AF247764_1 Toll-8 [Drosophila melanogaster] gi|7294300|gb|AAF49650.1| tollo [Drosophila melanog…	NP_524757, Q9V477, AAF18983, AAF86224, AAF49650, AAM49920	0.000241	59.6774	38.891	62	37	P:GO:0003401; P:GO:0010906; P:GO:0002227; P:GO:0007165; P:GO:0060026; P:GO:0060049; P:GO:0048935	P:axis elongation; P:regulation of glucose metabolic process; P:innate immune response in mucosa; P:signal transduction; P:convergent extension; P:regulation of protein glycosylation; P:peripheral nervous system neuron development	no GO terms
TRINITY_GG_9179_c1_g1_i1	Lko057S002058	4	flanking	alpha-amylase [Drosophila melanogaster]	1631	gi|12862562|dbj|BAB32542.1|alpha-amylase [Drosophila melanogaster]	BAB32542	0	75.6198	574.318	484	366	P:GO:0030431; C:GO:0005576	P:sleep; C:extracellular region	P:GO:0005975; F:GO:0003824; F:GO:0043169
TRINITY_GG_9179_c1_g1_i2;TRINITY_GG_9179_c2_g1_i1;TRINITY_GG_9179_c2_g1_i2;TRINITY_GG_9179_c4_g1_i1	Lko057S002058	4	flanking	alpha-amylase [Drosophila melanogaster]	1589	gi|348753|gb|AAA92243.1|alpha-amylase [Drosophila melanogaster] gi|12862548|dbj|BAB32535.1| alpha-amylase [Drosophila melanogaster] gi|12862552|dbj|BAB32537.1| alpha-amylase [Drosophila melanogaster] gi|12862554|dbj|BAB32538.1| alpha-amylase [Drosophila melanogaster]	AAA92243, BAB32535, BAB32537, BAB32538	0	71.5884	538.11	447	320	P:GO:0030431;C:GO:0005576	P:sleep;C:extracellularregion	P:GO:0005975;F:GO:0003824;F:GO:0043169
TRINITY_GG_9177_c0_g1_i1	Lko057S002058	4	flanking	Hig-anchoring scaffold protein	325	gi|221476283|ref|NP_001137840.1|Hig-anchoring scaffold protein, isoform D [Drosophila melanogaster] gi|115646386|gb|ABJ17040.1| IP14803p [Drosophila melanogaster] gi|220902076|gb|ACL83046.1| Hig-anchoring scaffold protein, isoform D [Drosophila melanogaster]	NP_001137840, ABJ17040, ACL83046	3.14e-20	88.7324	83.5741	71	63	F:GO:0030414; C:GO:0043083; P:GO:0019233	F:peptidase inhibitor activity; C:synaptic cleft; P:sensory perception of pain	F:GO:0030414; C:GO:0005576
TRINITY_GG_9180_c0_g1_i1	Lko057S002058	4	flanking	peroxidase	3727	gi|45553389|ref|NP_996223.1|peroxidase, isoform A [Drosophila melanogaster] gi|281361949|ref|NP_001163633.1| peroxidase, isoform B [Drosophila melanogaster] gi|290457651|sp|Q01603.2|PERO_DROME RecName: Full=Peroxidase; Short=DmPO; AltName: Full=Chorion peroxidase; Flags: Precursor gi|45446513|gb|AAS65161.1| peroxidase, isoform A [Drosophila melanogaster] gi|272477024|gb|ACZ94929.1| peroxidase, is…	NP_996223, NP_001163633, Q01603, AAS65161, ACZ94929	5.65e-148	59.589	463.381	584	348	P:GO:0022008; P:GO:0060967; P:GO:0007304; P:GO:1901216; C:GO:0005875; C:GO:0042600; C:GO:0005764; P:GO:0045471; P:GO:0070189; P:GO:0006727; P:GO:0001516; P:GO:0006909; P:GO:0030198	P:neurogenesis; P:negative regulation of gene silencing by RNA; P:chorion-containing eggshell formation; P:positive regulation of neuron death; C:microtubule associated complex; C:chorion; C:lysosome; P:response to ethanol; P:kynurenine metabolic process; P:ommochrome biosynthetic process; P:prostaglandin biosynthetic process; P:phagocytosis; P:extracellular matrix organization	F:GO:0004601; P:GO:0006979; P:GO:0055114; F:GO:0020037
TRINITY_GG_9175_c8_g1_i1	Lko057S002058	4	flanking	pol [Drosophila melanogaster]	358	gi|11323019|emb|CAC16871.1|pol [Drosophila melanogaster]	CAC16871	1.15e-08	59.7938	52.373	97	58			no IPS match
TRINITY_GG_9178_c0_g1_i1	Lko057S002058	4	flanking	visgun	4183	gi|24661848|ref|NP_648349.1|visgun, isoform C [Drosophila melanogaster] gi|24661852|ref|NP_729534.1| visgun, isoform D [Drosophila melanogaster] gi|7294888|gb|AAF50218.1| visgun, isoform C [Drosophila melanogaster] gi|23093790|gb|AAN11952.1| visgun, isoform D [Drosophila melanogaster] gi|289526393|gb|ADD01319.1| GH23431p [Drosophila melanogaster]	NP_648349, NP_729534, AAF50218, AAN11952, ADD01319	1e-13	92.3077	72.0182	39	36	P:GO:0007616; P:GO:0032504; P:GO:0007476; C:GO:0031410; P:GO:0008355; C:GO:0098549; P:GO:0048149; C:GO:0035324; P:GO:0042127	P:long-term memory; P:multicellular organism reproduction; P:imaginal disc-derived wing morphogenesis; C:cytoplasmic vesicle; P:olfactory learning; C:somatic ring canal; P:behavioral response to ethanol; C:female germline ring canal; P:regulation of cell proliferation	no GO terms
TRINITY_GG_6199_c13_g1_i1	Lko057S000182	4	LOD1	Bruno-3 transcript variant 8	368	gi|269868241|gb|ACZ52425.1|Bruno-3 transcript variant 8, partial [Drosophila melanogaster]	ACZ52425	2.83e-66	95.4128	204.912	109	104	F:GO:0000166; F:GO:0042803; F:GO:0003729; C:GO:0043234; P:GO:0017148	F:nucleotide binding; F:protein homodimerization activity; F:mRNA binding; C:protein complex; P:negative regulation of translation	F:GO:0003676
TRINITY_GG_6199_c1_g1_i1	Lko057S000182	4	LOD1	bruno 3	651	gi|28574919|ref|NP_524059.4|bruno 3, isoform B [Drosophila melanogaster] gi|23093533|gb|AAF49799.2| bruno 3, isoform B [Drosophila melanogaster]	NP_524059, AAF49799	2.82e-104	80.4545	305.834	220	177	F:GO:0000166; F:GO:0042803; F:GO:0003729; C:GO:0043234; P:GO:0017148	F:nucleotide binding; F:protein homodimerization activity; F:mRNA binding; C:protein complex; P:negative regulation of translation	F:GO:0003676
TRINITY_GG_6195_c0_g1_i1	Lko057S000182	4	LOD1	CG7638 [Drosophila melanogaster]	2385	gi|24662507|ref|NP_648439.1|CG7638 [Drosophila melanogaster] gi|21392134|gb|AAM48421.1| RE42071p [Drosophila melanogaster] gi|23093679|gb|AAF50096.2| CG7638 [Drosophila melanogaster]	NP_648439, AAM48421, AAF50096	0	74.7012	543.117	502	375			no GO terms
TRINITY_GG_6191_c4_g1_i1	Lko057S000182	4	LOD1	GH24215p [Drosophila melanogaster]	2661	gi|17861716|gb|AAL39335.1|GH24215p [Drosophila melanogaster]	AAL39335	7.75e-37	55.1546	146.747	194	107	F:GO:0003676; C:GO:0005634; C:GO:0043232; P:GO:0006355; C:GO:0044446	F:nucleic acid binding; C:nucleus; C:intracellular non-membrane-bounded organelle; P:regulation of transcription, DNA-templated; C:intracellular organelle part	F:GO:0003676
TRINITY_GG_6194_c16_g1_i1	Lko057S000182	4	LOD1	GH27953p [Drosophila melanogaster]	337	gi|15291571|gb|AAK93054.1|GH27953p [Drosophila melanogaster]	AAK93054	3.09e-17	81.4815	76.6406	54	44	F:GO:0008270; C:GO:0008230; P:GO:0035076; P:GO:0007474; P:GO:0008586; F:GO:0003682; P:GO:1900114; P:GO:0045944; C:GO:0044666; C:GO:0005700; C:GO:0000790; F:GO:0042393; P:GO:0018990; F:GO:0018024; F:GO:0030374; P:GO:0006909; P:GO:0051568	F:zinc ion binding; C:ecdysone receptor holocomplex; P:ecdysone receptor-mediated signaling pathway; P:imaginal disc-derived wing vein specification; P:imaginal disc-derived wing vein morphogenesis; F:chromatin binding; P:positive regulation of histone H3-K9 trimethylation; P:positive regulation of transcription from RNA polymerase II promoter; C:MLL3/4 complex; C:polytene chromosome; C:nuclear c…	no GO terms
TRINITY_GG_6191_c0_g1_i1	Lko057S000182	4	LOD1	hypothetical protein [Drosophila melanogaster]	1311	gi|114208068|emb|CAK95944.1|hypothetical protein [Drosophila melanogaster]	CAK95944	1.6e-55	55.5957	187.193	277	154	F:GO:0052689	F:carboxylic ester hydrolase activity	no GO terms
TRINITY_GG_6191_c2_g1_i1	Lko057S000182	4	LOD1	kuzbanian [Drosophila melanogaster]	4401	gi|1531633|gb|AAC47275.1|kuzbanian [Drosophila melanogaster]	AAC47275	0	75.7363	837.795	713	540	P:GO:0061320; P:GO:0035386; P:GO:0035051; P:GO:0007220; P:GO:0008593; P:GO:0007400; P:GO:0007411; P:GO:0007298; F:GO:0004222; P:GO:0008347; P:GO:0007419; C:GO:0098595; P:GO:0003007; P:GO:0030516; P:GO:0007219; P:GO:0006509; P:GO:0007519; P:GO:0048542; C:GO:0016021; P:GO:0006909	P:pericardial nephrocyte differentiation; P:regulation of Roundabout signaling pathway; P:cardiocyte differentiation; P:Notch receptor processing; P:regulation of Notch signaling pathway; P:neuroblast fate determination; P:axon guidance; P:border follicle cell migration; F:metalloendopeptidase activity; P:glial cell migration; P:ventral cord development; C:perivitelline space; P:heart morphogenes…	P:GO:0006508; F:GO:0004222; F:GO:0008237
TRINITY_GG_6193_c0_g1_i1	Lko057S000182	4	LOD1	Niemann-Pick type C-1a	6625	gi|24583258|ref|NP_609357.2|Niemann-Pick type C-1a, isoform A [Drosophila melanogaster] gi|320544872|ref|NP_001188769.1| Niemann-Pick type C-1a, isoform B [Drosophila melanogaster] gi|320544874|ref|NP_001188770.1| Niemann-Pick type C-1a, isoform C [Drosophila melanogaster] gi|320544876|ref|NP_001188771.1| Niemann-Pick type C-1a, isoform D [Drosophila melanogaster] gi|10728700|gb|AAF52874.2| Niema…	NP_609357, NP_001188769, NP_001188770, NP_001188771, AAF52874, ADV37019, ADV37020, ADV37021	0	70.1637	1416.75	1344	943	P:GO:0007391; P:GO:0007291; P:GO:0032374; P:GO:0007591; P:GO:0045456; P:GO:0007422; P:GO:0007444; C:GO:0044444; C:GO:0044425; F:GO:0004872; C:GO:0044446; C:GO:0043227; P:GO:0007417; P:GO:0050794; P:GO:0030299; P:GO:0016125; P:GO:0050896	P:dorsal closure; P:sperm individualization; P:regulation of cholesterol transport; P:molting cycle, chitin-based cuticle; P:ecdysteroid biosynthetic process; P:peripheral nervous system development; P:imaginal disc development; C:cytoplasmic part; C:membrane part; F:receptor activity; C:intracellular organelle part; C:membrane-bounded organelle; P:central nervous system development; P:regulation…	F:GO:0005319; C:GO:0016021
TRINITY_GG_6194_c1_g1_i1	Lko057S000182	4	LOD1	trithorax-related	7585	gi|28571451|ref|NP_726773.2|trithorax-related, isoform D [Drosophila melanogaster] gi|74865454|sp|Q8IRW8.2|TRR_DROME RecName: Full=Histone-lysine N-methyltransferase trr; AltName: Full=Lysine N-methyltransferase 2C; AltName: Full=Trithorax-related protein gi|28381556|gb|AAN09063.2| trithorax-related, isoform D [Drosophila melanogaster]	NP_726773, Q8IRW8, AAN09063	0	83.1169	811.987	539	448	P:GO:0035220; P:GO:0043966; C:GO:0008023; P:GO:0035186; F:GO:0044212; F:GO:0046974; F:GO:0046975; P:GO:0007411; P:GO:1900114; P:GO:0007458; C:GO:0005875; F:GO:0046976; P:GO:0002168; P:GO:0048813; C:GO:0048188; P:GO:0032968; C:GO:0005700; P:GO:0010452; P:GO:0051567; F:GO:0042800; P:GO:0044648; P:GO:0080182; P:GO:2001020; F:GO:0008270; P:GO:0035332; F:GO:0042803; C:GO:0035098; P:GO:0035076; C:GO:00…	P:wing disc development; P:histone H3 acetylation; C:transcription elongation factor complex; P:syncytial blastoderm mitotic cell cycle; F:transcription regulatory region DNA binding; F:histone methyltransferase activity (H3-K9 specific); F:histone methyltransferase activity (H3-K36 specific); P:axon guidance; P:positive regulation of histone H3-K9 trimethylation; P:progression of morphogenetic f…	C:GO:0005634; F:GO:0005515
TRINITY_GG_6191_c1_g1_i1	Lko057S000182	4	LOD1	uncharacterized protein Dmel_CG34150 [Drosophila melanogaster]	766	gi|281362481|ref|NP_001036756.2|uncharacterized protein Dmel_CG34150 [Drosophila melanogaster] gi|272477145|gb|ABI31206.2| uncharacterized protein Dmel_CG34150 [Drosophila melanogaster] gi|1049300645|gb|ANY27266.1| GEO11096p1, partial [Drosophila melanogaster]	NP_001036756, ABI31206, ANY27266	4.16e-22	71.875	89.7373	96	69	P:GO:0008150; C:GO:0005575; F:GO:0003674	P:biological_process; C:cellular_component; F:molecular_function	no GO terms
TRINITY_GG_6990_c0_g1_i1	Lko057S000376	4	LOD1	CG5522	3609	gi|20130059|ref|NP_611158.1|CG5522, isoform C [Drosophila melanogaster] gi|24654251|ref|NP_725616.1| CG5522, isoform D [Drosophila melanogaster] gi|24654253|ref|NP_725617.1| CG5522, isoform F [Drosophila melanogaster] gi|7302878|gb|AAF57951.1| CG5522, isoform D [Drosophila melanogaster] gi|21392018|gb|AAM48363.1| LD24677p [Drosophila melanogaster] gi|21645251|gb|AAM70889.1| CG5522, isoform C [Dro…	NP_611158, NP_725616, NP_725617, AAF57951, AAM48363, AAM70889, AAM70890	0	66.0714	556.984	560	370	P:GO:0007264; P:GO:0030182; F:GO:0005088; P:GO:0046579; P:GO:0048468; C:GO:0044424; P:GO:0043547; P:GO:0009887; F:GO:0005515; P:GO:0032989; P:GO:0097435; P:GO:0035239; P:GO:0061061; P:GO:0030036	P:small GTPase mediated signal transduction; P:neuron differentiation; F:Ras guanyl-nucleotide exchange factor activity; P:positive regulation of Ras protein signal transduction; P:cell development; C:intracellular part; P:positive regulation of GTPase activity; P:animal organ morphogenesis; F:protein binding; P:cellular component morphogenesis; P:supramolecular fiber organization; P:tube morphog…	P:GO:0007264; F:GO:0005085
TRINITY_GG_6994_c0_g1_i1	Lko057S000376	4	LOD1	Cyclin-dependent kinase 9 [Drosophila melanogaster]	2370	gi|24658274|ref|NP_477226.2|Cyclin-dependent kinase 9 [Drosophila melanogaster] gi|2599387|gb|AAB84112.1| positive transcription elongation factor b small subunit [Drosophila melanogaster] gi|7291442|gb|AAF46868.1| Cyclin-dependent kinase 9 [Drosophila melanogaster] gi|21429982|gb|AAM50669.1| GH21935p [Drosophila melanogaster]	NP_477226, AAB84112, AAF46868, AAM50669	0	91.8994	632.484	358	329	P:GO:0008360; P:GO:0007095; P:GO:0008045; P:GO:0008340; P:GO:0008582; P:GO:0090277; P:GO:0046579; P:GO:0007155; C:GO:0008024; P:GO:0006468; C:GO:0005875; P:GO:0040018; P:GO:0006368; P:GO:0051642; F:GO:0005524; C:GO:0005703; P:GO:0009408; P:GO:0048142; P:GO:0000086; C:GO:0071013; C:GO:0071011; P:GO:0007629; P:GO:0030707; P:GO:0000082; P:GO:0034126; C:GO:0032783; C:GO:0016533; P:GO:0035011; F:GO:00…	P:regulation of cell shape; P:mitotic G2 DNA damage checkpoint; P:motor neuron axon guidance; P:determination of adult lifespan; P:regulation of synaptic growth at neuromuscular junction; P:positive regulation of peptide hormone secretion; P:positive regulation of Ras protein signal transduction; P:cell adhesion; C:cyclin/CDK positive transcription elongation factor complex; P:protein phosphoryla…	F:GO:0005524; F:GO:0004672; P:GO:0006468
TRINITY_GG_6997_c0_g1_i1	Lko057S000376	4	LOD1	knockout	4217	gi|24667841|ref|NP_524193.2|knockout, isoform A [Drosophila melanogaster] gi|442633825|ref|NP_001262135.1| knockout, isoform B [Drosophila melanogaster] gi|7296388|gb|AAF51676.1| knockout, isoform A [Drosophila melanogaster] gi|440216103|gb|AGB94828.1| knockout, isoform B [Drosophila melanogaster] gi|544063514|gb|AGV77146.1| FI21431p1 [Drosophila melanogaster]	NP_524193, NP_001262135, AAF51676, AGB94828, AGV77146	5.34e-127	62.5523	421.779	478	299	P:GO:0008045	P:motor neuron axon guidance	no GO terms
TRINITY_GG_6989_c0_g1_i1	Lko057S000376	4	LOD1	mediator complex subunit 23 [Drosophila melanogaster]	4831	gi|19922780|ref|NP_611735.1|mediator complex subunit 23 [Drosophila melanogaster] gi|74872254|sp|Q9W1X7.1|MED23_DROME RecName: Full=Mediator of RNA polymerase II transcription subunit 23; AltName: Full=Mediator complex subunit 23; AltName: Full=dSUR2; AltName: Full=dTRAP150 gi|7291500|gb|AAF46925.1| mediator complex subunit 23 [Drosophila melanogaster]	NP_611735, Q9W1X7, AAF46925	0	74.743	1571.6	1362	1018	C:GO:0016592; F:GO:0001104; P:GO:0006367; P:GO:0006357	C:mediator complex; F:RNA polymerase II transcription cofactor activity; P:transcription initiation from RNA polymerase II promoter; P:regulation of transcription from RNA polymerase II promoter	no GO terms
TRINITY_GG_6987_c0_g1_i1;TRINITY_GG_6987_c3_g1_i1	Lko057S000376	4	LOD1	p130CAS	1128	gi|221330704|ref|NP_001137860.1|p130CAS, isoform E [Drosophila melanogaster] gi|220902399|gb|ACL83216.1| p130CAS, isoform E [Drosophila melanogaster]	NP_001137860, ACL83216	2.38e-110	68.1319	335.109	364	248	P:GO:0016337;C:GO:0005925;P:GO:0030011;P:GO:0007414;P:GO:0007016	P:singleorganismalcell-celladhesion;C:focaladhesion;P:maintenanceofcellpolarity;P:axonaldefasciculation;P:cytoskeletalanchoringatplasmamembrane	F:GO:0005515;noGOterms
TRINITY_GG_6996_c7_g1_i1;TRINITY_GG_7000_c2_g1_i1	Lko057S000376	4	LOD1	Ten-Eleven translocation (TET) family protein	237	gi|386770421|ref|NP_647750.4|Ten-Eleven translocation (TET) family protein, isoform C [Drosophila melanogaster] gi|386770423|ref|NP_001246583.1| Ten-Eleven translocation (TET) family protein, isoform D [Drosophila melanogaster] gi|383291704|gb|AAF47691.4| Ten-Eleven translocation (TET) family protein, isoform C [Drosophila melanogaster] gi|383291705|gb|AFH04254.1| Ten-Eleven translocation (TET) f…	NP_647750, NP_001246583, AAF47691, AFH04254	1.17e-34	92.7536	124.79	69	64	C:GO:0005634;F:GO:0003677;F:GO:0008270;P:GO:0009451;F:GO:0035516;P:GO:0045944;P:GO:1901537;F:GO:0005488	C:nucleus;F:DNAbinding;F:zincionbinding;P:RNAmodification;F:oxidativeDNAdemethylaseactivity;P:positiveregulationoftranscriptionfromRNApolymeraseIIpromoter;P:positiveregulationofDNAdemethylation;F:binding	noGOterms;noIPSmatch
TRINITY_GG_6998_c0_g1_i1	Lko057S000376	4	LOD1	uncharacterized protein Dmel_CG11802 [Drosophila melanogaster]	1178	gi|24641434|ref|NP_572759.1|uncharacterized protein Dmel_CG11802 [Drosophila melanogaster] gi|7292710|gb|AAF48107.1| uncharacterized protein Dmel_CG11802 [Drosophila melanogaster] gi|20152025|gb|AAM11372.1| LD30509p [Drosophila melanogaster]	NP_572759, AAF48107, AAM11372	1.46e-51	62.1005	176.792	219	136			no GO terms
TRINITY_GG_6988_c1_g1_i1	Lko057S000376	4	LOD1	uncharacterized protein Dmel_CG12341 [Drosophila melanogaster]	2641	gi|24652545|ref|NP_610612.1|uncharacterized protein Dmel_CG12341 [Drosophila melanogaster] gi|21430818|gb|AAM51087.1| SD17342p [Drosophila melanogaster] gi|21627513|gb|AAF58751.2| uncharacterized protein Dmel_CG12341 [Drosophila melanogaster]	NP_610612, AAM51087, AAF58751	6.31e-36	77.7778	133.265	126	98			no GO terms
TRINITY_GG_6994_c2_g1_i1;TRINITY_GG_6994_c3_g1_i1;TRINITY_GG_6994_c6_g1_i1	Lko057S000376	4	LOD1	uncharacterized protein Dmel_CG13917	1548	gi|24655363|ref|NP_647628.1|uncharacterized protein Dmel_CG13917, isoform A [Drosophila melanogaster] gi|320545410|ref|NP_001189017.1| uncharacterized protein Dmel_CG13917, isoform B [Drosophila melanogaster] gi|442629469|ref|NP_001261266.1| uncharacterized protein Dmel_CG13917, isoform C [Drosophila melanogaster] gi|939619971|ref|NP_001303399.1| uncharacterized protein Dmel_CG13917, isoform D [D…	NP_647628, NP_001189017, NP_001261266, NP_001303399, AAF47517, AAM50179, ADV37454, AGB93961, ALI30449	8.04e-48	58.8028	179.489	284	167	P:GO:0007154;P:GO:0044763;P:GO:0044700;P:GO:0048519;C:GO:0044424;P:GO:0009966;P:GO:0044237;P:GO:0051246;F:GO:0005515;P:GO:0048592;P:GO:0048522;P:GO:0071704;P:GO:0050896	P:cellcommunication;P:single-organismcellularprocess;P:singleorganismsignaling;P:negativeregulationofbiologicalprocess;C:intracellularpart;P:regulationofsignaltransduction;P:cellularmetabolicprocess;P:regulationofproteinmetabolicprocess;F:proteinbinding;P:eyemorphogenesis;P:positiveregulationofcellularprocess;P:organicsubstancemetabolicprocess;P:responsetostimulus	noGOterms;F:GO:0005515
TRINITY_GG_6995_c0_g1_i1;TRINITY_GG_6995_c0_g1_i2;TRINITY_GG_6995_c0_g1_i3	Lko057S000376	4	LOD1	uncharacterized protein Dmel_CG44247	2700	gi|24762763|ref|NP_611974.2|uncharacterized protein Dmel_CG44247, isoform B [Drosophila melanogaster] gi|665403571|ref|NP_726489.2| uncharacterized protein Dmel_CG44247, isoform A [Drosophila melanogaster] gi|7291866|gb|AAF47285.1| uncharacterized protein Dmel_CG44247, isoform B [Drosophila melanogaster] gi|262331584|gb|ACY46081.1| LP09747p [Drosophila melanogaster] gi|599127446|gb|AAF47283.3| un…	NP_611974, NP_726489, AAF47285, ACY46081, AAF47283	6.54e-37	81.1189	147.517	143	116	C:GO:0016021	C:integralcomponentofmembrane	C:GO:0016021
TRINITY_GG_6988_c0_g1_i1	Lko057S000376	4	LOD1	yeti	1309	gi|221336436|ref|NP_001137537.1|yeti, isoform A [Drosophila melanogaster] gi|665411070|ref|NP_001287636.1| yeti, isoform B [Drosophila melanogaster] gi|19528493|gb|AAL90361.1| RE36623p [Drosophila melanogaster] gi|220902706|gb|EED86089.1| yeti, isoform A [Drosophila melanogaster] gi|601125735|gb|EYR77324.1| yeti, isoform B [Drosophila melanogaster]	NP_001137537, NP_001287636, AAL90361, EED86089, EYR77324	1.08e-14	84.3137	74.3294	51	43	C:GO:0005634; C:GO:0005700; P:GO:0010032; P:GO:0007076; P:GO:0051570; P:GO:2000615; F:GO:0019894; P:GO:0051569	C:nucleus; C:polytene chromosome; P:meiotic chromosome condensation; P:mitotic chromosome condensation; P:regulation of histone H3-K9 methylation; P:regulation of histone H3-K9 acetylation; F:kinesin binding; P:regulation of histone H3-K4 methylation	no GO terms
TRINITY_GG_7307_c0_g1_i1	Lko057S000455	4	LOD1	alpha-Tubulin at 85E [Drosophila melanogaster]	1948	gi|17865841|ref|NP_524297.1|alpha-Tubulin at 85E [Drosophila melanogaster] gi|135410|sp|P06604.1|TBA2_DROME RecName: Full=Tubulin alpha-2 chain gi|158733|gb|AAA28986.1| alpha-tubulin 2 [Drosophila melanogaster] gi|7299237|gb|AAF54433.1| alpha-Tubulin at 85E [Drosophila melanogaster] gi|201065979|gb|ACH92399.1| FI07460p [Drosophila melanogaster]	NP_524297, P06604, AAA28986, AAF54433, ACH92399	0	85.2423	621.698	454	387	P:GO:0007094; P:GO:0035044; P:GO:0040016; P:GO:0035046; P:GO:0007052; P:GO:0009792; P:GO:0022008; C:GO:0000235; F:GO:0005525; F:GO:0003924; P:GO:0000281; F:GO:0017022; C:GO:0055028; P:GO:0035038; P:GO:0051028; P:GO:0007422; F:GO:0005200; C:GO:0005886; C:GO:0005811; C:GO:0005634; C:GO:0005813; C:GO:0048471; P:GO:0007417; P:GO:0051298; P:GO:0019730	P:mitotic spindle assembly checkpoint; P:sperm aster formation; P:embryonic cleavage; P:pronuclear migration; P:mitotic spindle organization; P:embryo development ending in birth or egg hatching; P:neurogenesis; C:astral microtubule; F:GTP binding; F:GTPase activity; P:mitotic cytokinesis; F:myosin binding; C:cortical microtubule; P:female pronucleus assembly; P:mRNA transport; P:peripheral nervo…	F:GO:0005525; F:GO:0003924; F:GO:0005200; P:GO:0007017; C:GO:0005874
TRINITY_GG_7520_c0_g1_i1	Lko057S000496	4	LOD1	ADP ribosylation factor-like 4	3760	gi|386763395|ref|NP_001245408.1|ADP ribosylation factor-like 4, isoform B [Drosophila melanogaster] gi|383293076|gb|AFH06768.1| ADP ribosylation factor-like 4, isoform B [Drosophila melanogaster]	NP_001245408, AFH06768	5.22e-74	89.726	249.595	146	131	P:GO:0000819; P:GO:1903047; P:GO:0032011; P:GO:1902036; P:GO:0045807; C:GO:0005795; P:GO:0001666; P:GO:0048488; P:GO:0072661; P:GO:0048081; C:GO:0005829; F:GO:0019904; P:GO:0000902; P:GO:0000226; P:GO:0006892; P:GO:0042147; C:GO:0005886; P:GO:0007269; C:GO:0005764; C:GO:0005912; P:GO:0030334; P:GO:0008360; P:GO:0035220; C:GO:0032154; P:GO:0033363; P:GO:0090158; P:GO:0007030; P:GO:0007155; P:GO:00…	P:sister chromatid segregation; P:mitotic cell cycle process; P:ARF protein signal transduction; P:regulation of hematopoietic stem cell differentiation; P:positive regulation of endocytosis; C:Golgi stack; P:response to hypoxia; P:synaptic vesicle endocytosis; P:protein targeting to plasma membrane; P:positive regulation of cuticle pigmentation; C:cytosol; F:protein domain specific binding; P:ce…	F:GO:0005525; P:GO:0007264; C:GO:0005622
TRINITY_GG_7513_c0_g1_i1	Lko057S000496	4	LOD1	AF435962_1mitochondrial ribosomal protein S15 [Drosophila melanogaster]	1559	gi|16930613|gb|AAL31972.1|AF435962_1mitochondrial ribosomal protein S15 [Drosophila melanogaster]	AAL31972	1.21e-70	68.3333	228.024	240	164	F:GO:0003735; P:GO:0032543; C:GO:0005763; P:GO:0040008	F:structural constituent of ribosome; P:mitochondrial translation; C:mitochondrial small ribosomal subunit; P:regulation of growth	F:GO:0003735; C:GO:0005840; C:GO:0005622; P:GO:0006412
TRINITY_GG_7512_c12_g1_i1;TRINITY_GG_7512_c13_g1_i1;TRINITY_GG_7512_c14_g1_i1;TRINITY_GG_7512_c15_g1_i1;TRINITY_GG_7512_c17_g1_i1	Lko057S000496	4	LOD1	cacophony	243	gi|386764283|ref|NP_001245638.1|cacophony, isoform N [Drosophila melanogaster] gi|383293348|gb|AFH07352.1| cacophony, isoform N [Drosophila melanogaster]	NP_001245638, AFH07352	2.36e-38	87.6543	135.191	81	71	C:GO:0005891;P:GO:0008344;P:GO:0006887;P:GO:0007632;P:GO:0045887;C:GO:0048786;F:GO:0005509;P:GO:0006936;P:GO:0070588;C:GO:0031594;P:GO:0016057;P:GO:0019722;P:GO:0046928;P:GO:0050908;F:GO:0008331;P:GO:0042045;F:GO:0008332;P:GO:0045433;P:GO:0007602;P:GO:0007269;P:GO:0002027;P:GO:0097352;P:GO:0070050;P:GO:0010524;P:GO:0016322;C:GO:0016323;C:GO:0016324	C:voltage-gatedcalciumchannelcomplex;P:adultlocomotorybehavior;P:exocytosis;P:visualbehavior;P:positiveregulationofsynapticgrowthatneuromuscularjunction;C:presynapticactivezone;F:calciumionbinding;P:musclecontraction;P:calciumiontransmembranetransport;C:neuromuscularjunction;P:regulationofmembranepotentialinphotoreceptorcell;P:calcium-mediatedsignaling;P:regulationofneurotransmittersecretion;P:de…	F:GO:0005509;F:GO:0005216;P:GO:0006811;P:GO:0055085;C:GO:0016020
TRINITY_GG_7512_c3_g1_i1	Lko057S000496	4	LOD1	calcium channel alpha-1 subunit [Drosophila melanogaster]	602	gi|1737064|gb|AAC47406.1|calcium channel alpha-1 subunit [Drosophila melanogaster]	AAC47406	1.45e-14	47.2393	72.4034	163	77	C:GO:0005891; P:GO:0008344; P:GO:0006887; P:GO:0007632; P:GO:0045887; C:GO:0048786; F:GO:0005509; P:GO:0070588; C:GO:0031594; P:GO:0016057; P:GO:0019722; P:GO:0046928; P:GO:0050908; F:GO:0008331; P:GO:0042045; F:GO:0008332; P:GO:0045433; P:GO:0007602; P:GO:0007269; P:GO:0002027; P:GO:0097352; P:GO:0070050; P:GO:0010524; P:GO:0016322; C:GO:0016323; C:GO:0016324	C:voltage-gated calcium channel complex; P:adult locomotory behavior; P:exocytosis; P:visual behavior; P:positive regulation of synaptic growth at neuromuscular junction; C:presynaptic active zone; F:calcium ion binding; P:calcium ion transmembrane transport; C:neuromuscular junction; P:regulation of membrane potential in photoreceptor cell; P:calcium-mediated signaling; P:regulation of neurotran…	no GO terms
TRINITY_GG_7519_c0_g1_i1	Lko057S000496	4	LOD1	CG9657	2034	gi|24640370|ref|NP_572397.1|CG9657, isoform A [Drosophila melanogaster] gi|665390134|ref|NP_001284983.1| CG9657, isoform B [Drosophila melanogaster] gi|22831892|gb|AAF46260.2| CG9657, isoform A [Drosophila melanogaster] gi|226958694|gb|ACO95724.1| FI02094p [Drosophila melanogaster] gi|599137673|gb|AHN59454.1| CG9657, isoform B [Drosophila melanogaster]	NP_572397, NP_001284983, AAF46260, ACO95724, AHN59454	7.53e-135	63.5879	410.223	563	358	P:GO:0051780; P:GO:0008343	P:behavioral response to nutrient; P:adult feeding behavior	P:GO:0055085; C:GO:0016020; P:GO:0006810; F:GO:0005215
TRINITY_GG_7515_c1_g1_i1	Lko057S000496	4	LOD1	G9a	3144	gi|18543183|ref|NP_569834.1|G9a, isoform A [Drosophila melanogaster] gi|16768908|gb|AAL28673.1| LD10743p [Drosophila melanogaster] gi|22831403|gb|AAF45487.2| G9a, isoform A [Drosophila melanogaster]	NP_569834, AAL28673, AAF45487	1.72e-173	53.9759	551.592	830	448	P:GO:0007165; P:GO:0006342; P:GO:0048468; P:GO:0048699; C:GO:0000785; P:GO:0007613; C:GO:0005886; C:GO:0005700; P:GO:0048583; P:GO:0051962; C:GO:0098793; P:GO:0034968; C:GO:0098687; P:GO:0051130; F:GO:0018024	P:signal transduction; P:chromatin silencing; P:cell development; P:generation of neurons; C:chromatin; P:memory; C:plasma membrane; C:polytene chromosome; P:regulation of response to stimulus; P:positive regulation of nervous system development; C:presynapse; P:histone lysine methylation; C:chromosomal region; P:positive regulation of cellular component organization; F:histone-lysine N-methyltra…	C:GO:0005634; F:GO:0008270; F:GO:0005515; P:GO:0034968; F:GO:0018024
TRINITY_GG_7516_c0_g1_i1	Lko057S000496	4	LOD1	GH10876p	2658	gi|40216063|gb|AAL68195.2|GH10876p, partial [Drosophila melanogaster]	AAL68195	9.29e-65	53.6932	223.016	352	189	P:GO:0044699; P:GO:0009987; P:GO:0032501	P:single-organism process; P:cellular process; P:multicellular organismal process	F:GO:0004531; P:GO:0006259
TRINITY_GG_7515_c2_g1_i1	Lko057S000496	4	LOD1	Histone-lysine N-methyltransferase, H3 lysine-9 specific 5 [Zootermopsis nevadensis]	749	gi|646703157|gb|KDR11973.1|Histone-lysine N-methyltransferase, H3 lysine-9 specific 5 [Zootermopsis nevadensis]	KDR11973	4.33e-20	59.1241	97.4413	137	81	C:GO:0005634; F:GO:0008270; P:GO:0034968; F:GO:0018024; F:GO:0008168; C:GO:0005694; F:GO:0016740; P:GO:0032259	C:nucleus; F:zinc ion binding; P:histone lysine methylation; F:histone-lysine N-methyltransferase activity; F:methyltransferase activity; C:chromosome; F:transferase activity; P:methylation	no GO terms
TRINITY_GG_7522_c2_g1_i1	Lko057S000496	4	LOD1	hypothetical protein L798_01153 [Zootermopsis nevadensis]	2209	gi|646697166|gb|KDR09027.1|hypothetical protein L798_01153 [Zootermopsis nevadensis]	KDR09027	9.55e-14	60.9375	77.411	128	78	C:GO:0016020; C:GO:0016021	C:membrane; C:integral component of membrane	no GO terms
TRINITY_GG_7511_c4_g1_i1	Lko057S000496	4	LOD1	hypothetical protein L798_05885 [Zootermopsis nevadensis]	3087	gi|646715363|gb|KDR19005.1|hypothetical protein L798_05885 [Zootermopsis nevadensis]	KDR19005	6.84e-27	52.9644	126.716	253	134			no GO terms
TRINITY_GG_7521_c0_g1_i1	Lko057S000496	4	LOD1	LP16180p	1845	gi|54650722|gb|AAV36940.1|LP16180p, partial [Drosophila melanogaster]	AAV36940	0	70.8758	548.125	491	348	F:GO:0008430	F:selenium binding	F:GO:0005515; F:GO:0008430
TRINITY_GG_7511_c2_g1_i1	Lko057S000496	4	LOD1	Neb-cGP	1543	gi|21358399|ref|NP_652548.1|Neb-cGP, isoform A [Drosophila melanogaster] gi|442615789|ref|NP_001259408.1| Neb-cGP, isoform B [Drosophila melanogaster] gi|7291156|gb|AAF46590.1| Neb-cGP, isoform A [Drosophila melanogaster] gi|17945725|gb|AAL48911.1| RE31692p [Drosophila melanogaster] gi|17946655|gb|AAL49358.1| RH45340p [Drosophila melanogaster] gi|440216616|gb|AGB95251.1| Neb-cGP, isoform B [Droso…	NP_652548, NP_001259408, AAF46590, AAL48911, AAL49358, AGB95251	2.07e-11	74.4681	59.6918	47	35	C:GO:0005615; F:GO:0005179; P:GO:0040008	C:extracellular space; F:hormone activity; P:regulation of growth	no IPS match
TRINITY_GG_7518_c0_g1_i1	Lko057S000496	4	LOD1	obstructor-A	2112	gi|24643464|ref|NP_608378.2|obstructor-A, isoform A [Drosophila melanogaster] gi|386764792|ref|NP_001245778.1| obstructor-A, isoform B [Drosophila melanogaster] gi|22832686|gb|AAF50927.2| obstructor-A, isoform A [Drosophila melanogaster] gi|25012311|gb|AAN71267.1| LD43683p [Drosophila melanogaster] gi|383293512|gb|AFH07490.1| obstructor-A, isoform B [Drosophila melanogaster]	NP_608378, NP_001245778, AAF50927, AAN71267, AFH07490	4.56e-100	74.4493	307.76	227	169	C:GO:0005615; F:GO:0008061; P:GO:0040014; P:GO:0035151; P:GO:0008362; P:GO:0010716; P:GO:0006030	C:extracellular space; F:chitin binding; P:regulation of multicellular organism growth; P:regulation of tube size, open tracheal system; P:chitin-based embryonic cuticle biosynthetic process; P:negative regulation of extracellular matrix disassembly; P:chitin metabolic process	F:GO:0008061; P:GO:0006030; C:GO:0005576
TRINITY_GG_7511_c1_g1_i1	Lko057S000496	4	LOD1	obstructor-B [Drosophila melanogaster]	1901	gi|19921036|ref|NP_609339.1|obstructor-B [Drosophila melanogaster] gi|5052514|gb|AAD38587.1|AF145612_1 BcDNA.GH02976 [Drosophila melanogaster] gi|7297598|gb|AAF52851.1| obstructor-B [Drosophila melanogaster]	NP_609339, AAD38587, AAF52851	6.84e-105	76.9912	322.013	226	174	C:GO:0005615; F:GO:0008061; P:GO:0040014; P:GO:0035151; P:GO:0008362; P:GO:0010716; P:GO:0006030	C:extracellular space; F:chitin binding; P:regulation of multicellular organism growth; P:regulation of tube size, open tracheal system; P:chitin-based embryonic cuticle biosynthetic process; P:negative regulation of extracellular matrix disassembly; P:chitin metabolic process	F:GO:0008061; P:GO:0006030; C:GO:0005576
TRINITY_GG_7513_c1_g1_i1;TRINITY_GG_7513_c1_g1_i2;TRINITY_GG_7513_c1_g1_i3;TRINITY_GG_7513_c1_g1_i4	Lko057S000496	4	LOD1	oscillin	2212	gi|386769147|ref|NP_001245895.1|oscillin, isoform D [Drosophila melanogaster] gi|386769153|ref|NP_001245898.1| oscillin, isoform G [Drosophila melanogaster] gi|383291344|gb|AFH03569.1| oscillin, isoform D [Drosophila melanogaster] gi|383291347|gb|AFH03572.1| oscillin, isoform G [Drosophila melanogaster]	NP_001245895, NP_001245898, AFH03569, AFH03572	9.14e-159	92.8839	461.07	267	248	P:GO:0005975;P:GO:0006091;C:GO:0005737;P:GO:0006043;F:GO:0004342;P:GO:0006044	P:carbohydratemetabolicprocess;P:generationofprecursormetabolitesandenergy;C:cytoplasm;P:glucosaminecatabolicprocess;F:glucosamine-6-phosphatedeaminaseactivity;P:N-acetylglucosaminemetabolicprocess	P:GO:0005975;P:GO:0006044;F:GO:0004342
TRINITY_GG_7516_c1_g1_i1	Lko057S000496	4	LOD1	Rhomboid domain-containing protein 1 [Zootermopsis nevadensis]	2456	gi|646709126|gb|KDR15145.1|Rhomboid domain-containing protein 1 [Zootermopsis nevadensis]	KDR15145	6.35e-97	75.6198	309.301	242	183	C:GO:0016020	C:membrane	C:GO:0016021; F:GO:0004252
TRINITY_GG_7511_c9_g1_i1	Lko057S000496	4	LOD1	Transposable element Tcb2 transposase	545	gi|307191901|gb|EFN75320.1|Transposable element Tcb2 transposase, partial [Harpegnathos saltator]	EFN75320	2.61e-18	48.5207	85.1149	169	82	F:GO:0003677; F:GO:0004803; P:GO:0006313	F:DNA binding; F:transposase activity; P:transposition, DNA-mediated	no IPS match
TRINITY_GG_7511_c5_g1_i1	Lko057S000496	4	LOD1	uncharacterized protein Dmel_CG10933 [Drosophila melanogaster]	1837	gi|45550453|ref|NP_611251.2|uncharacterized protein Dmel_CG10933 [Drosophila melanogaster] gi|1148367328|sp|A1ZAY1.1|DLISH_DROME RecName: Full=SH3 domain-containing protein Dlish; AltName: Full=Dachs ligand with SH3 domains gi|45445492|gb|AAF57808.2| uncharacterized protein Dmel_CG10933 [Drosophila melanogaster] gi|260656079|gb|ACX47665.1| FI04490p [Drosophila melanogaster]	NP_611251, A1ZAY1, AAF57808, ACX47665	1.42e-81	76.7956	261.536	181	139	P:GO:0018108; P:GO:0007293; F:GO:0005070; P:GO:0090136; P:GO:0007294; F:GO:0050839; P:GO:0008302; P:GO:0045886; P:GO:0007411; P:GO:0007254; C:GO:0005794; C:GO:0045169; P:GO:0042059; F:GO:0005158; P:GO:0007009; P:GO:0042062; P:GO:0007409; P:GO:0030707; F:GO:0005509; P:GO:0048167; C:GO:0031594; C:GO:0045170; P:GO:0035556; F:GO:0019901; P:GO:0050807; P:GO:0043277; P:GO:0007026; P:GO:0006099; P:GO:00…	P:peptidyl-tyrosine phosphorylation; P:germarium-derived egg chamber formation; F:SH3/SH2 adaptor activity; P:epithelial cell-cell adhesion; P:germarium-derived oocyte fate determination; F:cell adhesion molecule binding; P:female germline ring canal formation, actin assembly; P:negative regulation of synaptic growth at neuromuscular junction; P:axon guidance; P:JNK cascade; C:Golgi apparatus; C:…	F:GO:0005515
TRINITY_GG_7513_c2_g1_i1	Lko057S000496	4	LOD1	uncharacterized protein Dmel_CG31974	1805	gi|281360460|ref|NP_722609.2|uncharacterized protein Dmel_CG31974, isoform B [Drosophila melanogaster] gi|442624875|ref|NP_001259799.1| uncharacterized protein Dmel_CG31974, isoform C [Drosophila melanogaster] gi|21429784|gb|AAM50570.1| AT24407p [Drosophila melanogaster] gi|272406840|gb|AAF51543.3| uncharacterized protein Dmel_CG31974, isoform B [Drosophila melanogaster] gi|440213045|gb|AGB92336.…	NP_722609, NP_001259799, AAM50570, AAF51543, AGB92336	1.16e-48	49.6063	176.022	381	189	P:GO:0055070	P:copper ion homeostasis	no GO terms
TRINITY_GG_8323_c0_g1_i1;TRINITY_GG_8323_c1_g1_i1	Lko057S000668	4	LOD1	armitage	1021	gi|386770509|ref|NP_001246603.1|armitage, isoform C [Drosophila melanogaster] gi|383291731|gb|AFH04274.1| armitage, isoform C [Drosophila melanogaster]	NP_001246603, AFH04274	8.06e-22	59.6491	97.8265	114	68	P:GO:0007293;P:GO:0046843;C:GO:0043025;C:GO:0045202;P:GO:0048813;P:GO:0007319;P:GO:0007616;C:GO:0030425;P:GO:0007317;F:GO:0005515;P:GO:0007318;P:GO:0000184;C:GO:0005739;C:GO:0043186;C:GO:0005829;P:GO:2000002;P:GO:0031023;C:GO:0070725;P:GO:0016246;C:GO:0030424;P:GO:0016325	P:germarium-derivedeggchamberformation;P:dorsalappendageformation;C:neuronalcellbody;C:synapse;P:dendritemorphogenesis;P:negativeregulationofoskarmRNAtranslation;P:long-termmemory;C:dendrite;P:regulationofpoleplasmoskarmRNAlocalization;F:proteinbinding;P:poleplasmproteinlocalization;P:nuclear-transcribedmRNAcatabolicprocess,nonsense-mediateddecay;C:mitochondrion;C:Pgranule;C:cytosol;P:negativereg…	noGOterms
TRINITY_GG_8323_c4_g1_i1	Lko057S000668	4	LOD1	armitage [Drosophila melanogaster]	201	gi|429892416|gb|AGA18750.1|armitage [Drosophila melanogaster]	AGA18750	5.55e-15	77.4194	68.1662	62	48	P:GO:0007293; P:GO:0046843; C:GO:0043025; C:GO:0045202; P:GO:0007319; P:GO:0007616; C:GO:0030425; F:GO:0003678; P:GO:0007317; F:GO:0005515; P:GO:0007318; P:GO:0000184; C:GO:0005739; C:GO:0043186; C:GO:0005829; P:GO:2000002; P:GO:0031023; C:GO:0070725; P:GO:0016246; C:GO:0030424; P:GO:0016325	P:germarium-derived egg chamber formation; P:dorsal appendage formation; C:neuronal cell body; C:synapse; P:negative regulation of oskar mRNA translation; P:long-term memory; C:dendrite; F:DNA helicase activity; P:regulation of pole plasm oskar mRNA localization; F:protein binding; P:pole plasm protein localization; P:nuclear-transcribed mRNA catabolic process, nonsense-mediated decay; C:mitochon…	no GO terms
TRINITY_GG_8323_c2_g1_i1	Lko057S000668	4	LOD1	cag	285	gi|17137282|ref|NP_477207.1|cag, isoform A [Drosophila melanogaster] gi|442623274|ref|NP_001260876.1| cag, isoform B [Drosophila melanogaster] gi|7303681|gb|AAF58731.1| cag, isoform A [Drosophila melanogaster] gi|28316850|gb|AAO39448.1| RH58567p [Drosophila melanogaster] gi|440214280|gb|AGB93409.1| cag, isoform B [Drosophila melanogaster]	NP_477207, NP_001260876, AAF58731, AAO39448, AGB93409	7.99e-09	67.7966	51.2174	59	40	F:GO:0003677	F:DNA binding	F:GO:0003677
TRINITY_GG_8343_c11_g1_i1;TRINITY_GG_8343_c13_g1_i1;TRINITY_GG_8343_c14_g1_i1;TRINITY_GG_8343_c18_g1_i1	Lko057S000668	4	LOD1	Cd GTPase activating protein-related	292	gi|19921564|ref|NP_610002.1|Cd GTPase activating protein-related, isoform A [Drosophila melanogaster] gi|442628475|ref|NP_001260600.1| Cd GTPase activating protein-related, isoform D [Drosophila melanogaster] gi|74948040|sp|Q9VIS1.2|CDGAP_DROME RecName: Full=GTPase-activating protein CdGAPr; AltName: Full=d-CdGAPr gi|7271811|gb|AAF44627.1| GTPase activating protein [Drosophila melanogaster] gi|22…	NP_610002, NP_001260600, Q9VIS1, AAF44627, AAF53844, AGB93135	7.96e-07	67.4419	46.2098	43	29	P:GO:0031290;F:GO:0005096;P:GO:0016337;P:GO:0007480;P:GO:0043408;P:GO:0007165;P:GO:0007030;F:GO:0005488;P:GO:0048749;P:GO:0023056;P:GO:0044087;P:GO:0010647;P:GO:0043087;P:GO:0045792;P:GO:0034334;P:GO:0051128;P:GO:0044699;P:GO:0009987;P:GO:0050896	P:retinalganglioncellaxonguidance;F:GTPaseactivatoractivity;P:singleorganismalcell-celladhesion;P:imaginaldisc-derivedlegmorphogenesis;P:regulationofMAPKcascade;P:signaltransduction;P:Golgiorganization;F:binding;P:compoundeyedevelopment;P:positiveregulationofsignaling;P:regulationofcellularcomponentbiogenesis;P:positiveregulationofcellcommunication;P:regulationofGTPaseactivity;P:negativeregulatio…	F:GO:0005515;P:GO:0007165;noIPSmatch
TRINITY_GG_8332_c5_g1_i1	Lko057S000668	4	LOD1	CF1a protein (C-term.)	294	gi|7716|emb|CAA36496.1|CF1a protein (C-term.), partial [Drosophila melanogaster]	CAA36496	3.2e-53	89.6907	169.859	97	87	P:GO:0035220; P:GO:0008045; P:GO:0035284; P:GO:0036022; P:GO:0007422; P:GO:0007398; P:GO:0007425; P:GO:0045944; P:GO:0048814; P:GO:0007402; P:GO:0008039; F:GO:0000980; C:GO:0005634; P:GO:0007419; F:GO:0001077; P:GO:0007636; F:GO:0003714; P:GO:0050911; P:GO:0002807; P:GO:0070983; P:GO:0014019; P:GO:0002809	P:wing disc development; P:motor neuron axon guidance; P:brain segmentation; P:limb joint morphogenesis; P:peripheral nervous system development; P:ectoderm development; P:epithelial cell fate determination, open tracheal system; P:positive regulation of transcription from RNA polymerase II promoter; P:regulation of dendrite morphogenesis; P:ganglion mother cell fate determination; P:synaptic tar…	F:GO:0003677; F:GO:0003700; P:GO:0006355
TRINITY_GG_8314_c2_g1_i1	Lko057S000668	4	LOD1	CG7264	1628	gi|21357483|ref|NP_648515.1|CG7264, isoform A [Drosophila melanogaster] gi|442631796|ref|NP_001261727.1| CG7264, isoform B [Drosophila melanogaster] gi|7294663|gb|AAF50001.1| CG7264, isoform A [Drosophila melanogaster] gi|20151737|gb|AAM11228.1| RE41410p [Drosophila melanogaster] gi|440215653|gb|AGB94421.1| CG7264, isoform B [Drosophila melanogaster]	NP_648515, NP_001261727, AAF50001, AAM11228, AGB94421	7.14e-45	54.1787	163.696	347	188			no GO terms
TRINITY_GG_8317_c0_g1_i1	Lko057S000668	4	LOD1	CG7829 [Drosophila melanogaster]	1033	gi|21358525|ref|NP_651732.1|CG7829 [Drosophila melanogaster] gi|7301838|gb|AAF56947.1| CG7829 [Drosophila melanogaster] gi|21064697|gb|AAM29578.1| RH19795p [Drosophila melanogaster]	NP_651732, AAF56947, AAM29578	6.61e-31	46.8085	118.242	235	110	P:GO:0008150; P:GO:0006508; F:GO:0004252; F:GO:0008236; C:GO:0005575; F:GO:0003674	P:biological_process; P:proteolysis; F:serine-type endopeptidase activity; F:serine-type peptidase activity; C:cellular_component; F:molecular_function	P:GO:0006508; F:GO:0004252
[truncated: 772 more rows]

## Sheet: S4
Table S4. All enriched GO terms with at least one annotation in the test set (Significant > 0) after correcting for pseudoreplication. GO ID and Term give the tested GO term, Annotated is the total number of loci that have that particular GO annotation, Significant is the number of loci with that GO annotation in the test set, Expected is the expected number of loci with that annotation in the te…
[truncated: 38 more rows]

## Sheet: S5
Table S5. 20 most strongly enriched GO terms per LG after correcting for pseudoreplication. See Table S4 for details
[truncated: 22 more rows]

[truncated: 3 more sheets: S6, S7, S8]
